# Supplementary material for: Enhanced Outer Membrane Vesicle Production in Escherichia coli: from Metabolic Network Model to Designed Strain Lipidomic Profile
Source: Preprints.org preprint supplement (doi:10.20944/preprints202409.1980.v1), 2024-09-25
Supplement: Supplementary file 1 [file supplementary]

Archive with 3 entries (3 files):
- Table 1.XLSX
- Table 2.XLSX
- Table 3.XLSX
