# Supplementary material for: Enhanced Outer Membrane Vesicle Production in Escherichia coli: from Metabolic Network Model to Designed Strain Lipidomic Profile
Source: Preprints.org preprint supplement (doi:10.20944/preprints202409.1980.v1), 2024-09-25
Supplement: Supplementary file 1 [file supplementary › Table 1.XLSX]

## Sheet: S1_Model_data
Metabolites	Exchange reactions	Transport reactions, periplasm	Transport reactions	Reactions, periplasm	Reactions
12dgr120[p]	EX_12ppd__R_e	12DGR120tipp	12PPDRtex	23DAPPAt2pp	13PPDH2
12dgr120[c]	EX_12ppd__S_e	12DGR140tipp	12PPDStex	23PDE2pp	2AGPEAT120
12dgr140[p]	EX_13ppd_e	12DGR141tipp	14GLUCANtexi	23PDE4pp	2AGPEAT140
12dgr140[c]	EX_14glucan_e	12DGR160tipp	23CAMPtex	23PDE7pp	2AGPEAT141
12dgr141[p]	EX_15dap_e	12DGR161tipp	23CCMPtex	23PDE9pp	2AGPEAT160
12dgr141[c]	EX_23camp_e	12DGR180tipp	23CGMPtex	2DOXG6PP	2AGPEAT161
12dgr160[p]	EX_23ccmp_e	12DGR181tipp	23CUMPtex	3HOXPACt2pp	2AGPEAT180
12dgr160[c]	EX_23cgmp_e	2AGPA120tipp	23DAPPAtex	3NTD2pp	2AGPEAT181
12dgr161[p]	EX_23cump_e	2AGPA140tipp	26DAHtex	3NTD4pp	2AGPGAT120
12dgr161[c]	EX_23dappa_e	2AGPA141tipp	2DGLCtex	3NTD7pp	2AGPGAT140
12dgr180[p]	EX_23dhbzs3_e	2AGPA160tipp	2PGtex	3NTD9pp	2AGPGAT141
12dgr180[c]	EX_26dap__M_e	2AGPA161tipp	34dhpactex	3NTYROXDApp	2AGPGAT160
12dgr181[p]	EX_2ddglcn_e	2AGPA180tipp	3AMPtex	42A12BOOXpp	2AGPGAT161
12dgr181[c]	EX_2dglc_e	2AGPA181tipp	3CMPtex	4HBZt3pp	2AGPGAT180
12ppd__R[e]	EX_2pg_e	2AGPE120tipp	3GMPtex	4HOXPACt2pp	2AGPGAT181
12ppd__R[p]	EX_34dhpac_e	2AGPE140tipp	3HOXPACtex	4HTHRtrpp	2DGULRGx
12ppd__R[c]	EX_3amp_e	2AGPE141tipp	3HPPtex	4PCPpp	2DGULRGy
12ppd__S[e]	EX_3cmp_e	2AGPE160tipp	3PEPTtex	5DGLCNt2rpp	2DGULRx
12ppd__S[p]	EX_3gmp_e	2AGPE161tipp	3PGtex	AAMYLpp	2DGULRy
12ppd__S[c]	EX_3hcinnm_e	2AGPE180tipp	3UMPtex	ABUTt2pp	2HESR
h[c]	EX_3hoxpac_e	2AGPE181tipp	4ABZGLUtex	ACACt2pp	2HH24DDH
3hppnl[c]	EX_3hpp_e	2AGPG120tipp	4HOXPACDtex	ACGAL1PPpp	2HH24DDH1
nadph[c]	EX_3hpppn_e	2AGPG140tipp	4HTHRtex	ACGALptspp	2HPTCOAT
13ppd[c]	EX_3ntym_e	2AGPG141tipp	4PEPTtex	ACGAM1PPpp	2MAHMP
nadp[c]	EX_3pg_e	2AGPG160tipp	5DGLCNtex	ACGAptspp	2PHACTE
14glucan[p]	EX_3ump_e	2AGPG161tipp	5MTRtex	ACMANAptspp	34DHALDD
atp[c]	EX_4abut_e	2AGPG180tipp	ABUTtex	ACMUMptspp	34PHACTE
h2o[c]	EX_4abz_e	2AGPG181tipp	ACACtex	ACNAMt2pp	35PHACTE
adp[c]	EX_4abzglu_e	CLtipp	ACALDtex	ACt2rpp	3AMACHYD
pi[c]	EX_4hoxpac_e	PHEtipp	ACGAL1Ptex	ACt4pp	3HAD100
14glucan[c]	EX_4hoxpacd_e	TRPtipp	ACGALtex	ADEt2rpp	3HAD120
14glucan[e]	EX_4hphac_e	TYRtipp	ACGAM1Ptex	ADNt2pp	3HAD121
23camp[e]	EX_4hthr_e	12PPDRtpp	ACGAtex	ADOCBLPP	3HAD140
23camp[p]	EX_5dglcn_e	12PPDStpp	ACMANAtex	AGM3PApp	3HAD141
23ccmp[e]	EX_5mtr_e	3HPPtpp	ACMUMtex	AGM3Pt2pp	3HAD160
23ccmp[p]	EX_6apa_e	5MTRtpp	ACNAMtex	AGM4PApp	3HAD161
23cgmp[e]	EX_abt__D_e	ACALDtpp	ACOLIPAabctex	AGM4PCPpp	3HAD180
23cgmp[p]	EX_ac_e	ACSERtpp	ACSERtex	AGM4Pt2pp	3HAD181
23cump[e]	EX_acac_e	AI2tpp	ACtex	AGMt2pp	3HAD40
23cump[p]	EX_acald_e	AIRStpp	ADEtex	AKGt2rpp	3HAD60
h[p]	EX_acgal_e	ALAtpp	ADNtex	ALAt2pp	3HAD80
23dappa[p]	EX_acgal1p_e	ARBTNtpp	AEPtex	ALAt4pp	3HBCOAHL
23dappa[c]	EX_acgam_e	ATPPRT	AGMtex	ALLTNt2rpp	3HBZCT
23dappa[e]	EX_acgam1p_e	CADVtpp	AI2tex	ALPATE160pp	3HCINNMH
h2o[p]	EX_acmana_e	CD2tpp	AIRStex	ALPATG160pp	3HPADHi
3ump[p]	EX_acmum_e	CHOLATEtpp	AKGtex	ARBt2rpp	3HPAOX
3cmp[p]	EX_acnam_e	CMtpp	ALAALAtex	ARBt3ipp	3HPPPNH
3amp[p]	EX_acser_e	CO2tpp	ALAtex	ARBTptspp	3KGK
3gmp[p]	EX_ade_e	COBALT2tpp	ALLtex	ARGAGMt7pp	3OAR100
26dap__M[e]	EX_adn_e	CPGNUtpp	ALLTNtex	ARGDCpp	3OAR120
26dap__M[p]	EX_adocbl_e	CU2tpp	AMPtex	ARGORNt7pp	3OAR121
2ddecg3p[p]	EX_AEP_e	CYANSTpp	ANHGMtex	ARGt3pp	3OAR140
2ddecg3p[c]	EX_ag_e	CYSItpp	ARBtex	ASCBptspp	3OAR141
2tdecg3p[p]	EX_agm_e	CYStpp	ARBTNtex	ASNNpp	3OAR160
2tdecg3p[c]	EX_airs_e	DHAtpp	ARBTtex	ASNt2rpp	3OAR161
2tdec7eg3p[p]	EX_akg_e	DMSOtpp	ARGtex	ASO3t8pp	3OAR180
2tdec7eg3p[c]	EX_ala__D_e	DNTPPA	ASCBtex	ASPt2pp	3OAR181
2hdecg3p[p]	EX_ala__L_e	DOXRBCNtpp	ASNtex	ATPS4rpp	3OAR40
2hdecg3p[c]	EX_ala_B_e	DXYLONtpp	ASO3tex	BALAt2pp	3OAR60
2hdec9eg3p[p]	EX_alaala_e	DXYLUDtpp	ASPtex	BTNt2ipp	3OAR80
2hdec9eg3p[c]	EX_all__D_e	ECAtpp	BALAtex	BUTt2rpp	3OAS100
2odecg3p[p]	EX_alltn_e	FALDtpp	BTNtex	CA2t3pp	3OAS120
2odecg3p[c]	EX_amp_e	FE2tpp	BUTSO3tex	CAt6pp	3OAS121
2odec11eg3p[p]	EX_anhgm_e	FE3HOXUtpp	BUTtex	CD2t3pp	3OAS140
2odec11eg3p[c]	EX_arab__D_e	FECRMUtpp	CA2tex	CH4t2pp	3OAS141
2agpe120[p]	EX_arab__L_e	FEENTERtpp	CD2tex	CHLt2pp	3OAS160
2agpe120[c]	EX_arbt_e	FEOXAMUtpp	CGLYtex	CHTBSptspp	3OAS161
2agpe140[p]	EX_arbtn_e	FORtppi	CH4tex	CITt3pp	3OAS180
2agpe140[c]	EX_arbtn_fe3_e	Ftpp	CHLtex	CITt7pp	3OAS181
2agpe141[p]	EX_arg__L_e	FUCtpp	CHTBStex	CLPNH120pp	3OAS60
2agpe141[c]	EX_ascb__L_e	FUSAtpp	CITtex	CLPNH140pp	3OAS80
2agpe160[p]	EX_asn__L_e	GLYALDtpp	CLBtex	CLPNH141pp	3OXCOAT
2agpe160[c]	EX_aso3_e	GLYCtpp	CLIPAabctex	CLPNH160pp	3PHACOAOR
2agpe161[p]	EX_asp__L_e	GUAtpp	CLtex	CLPNH161pp	3PHACTE
2agpe161[c]	EX_btd_RR_e	H2Otpp	CMPtex	CLPNH180pp	3SLAR
2agpe180[p]	EX_btn_e	H2tpp	CMtex	CLPNH181pp	4ABZGLUH
2agpe180[c]	EX_but_e	HYXNtpp	CO2tex	CLPNS120pp	4ABZGLUtr
2agpe181[p]	EX_butso3_e	INOSTtpp	COBALT2tex	CLPNS140pp	4H2KPILY
2agpe181[c]	EX_bz_e	LA4NTpp	COLIPAabctex	CLPNS141pp	4H3NALDD
ddca[c]	EX_ca2_e	LALADGLUtpp	COLIPAPabctex	CLPNS160pp	4HALDD
pe120[c]	EX_cbi_e	LALALGLUtpp	CPGNUtex	CLPNS161pp	4HOXPACMOF
ppi[c]	EX_cbl1_e	LCTStpp	CRNDtex	CLPNS180pp	4HTHRA
amp[c]	EX_cd2_e	MG2tpp	CRNtex	CLPNS181pp	4HTHRK
ttdca[c]	EX_cellb_e	MINCYCtpp	CS1tex	CLt3_2pp	4HTHRS
pe140[c]	EX_cgly_e	MN2tpp	CSNtex	COBALT2t3pp	4PCP
ttdcea[c]	EX_ch4_e	N2Otpp	CU2tex	COLIPAKpp	4PHACTE
pe141[c]	EX_chitob_e	NACtpp	CUtex	CRNDt2rpp	5DKGR
hdca[c]	EX_chol_e	NH4tpp	CYANtex	CRNt2rpp	5DOAN
pe160[c]	EX_chtbs_e	NI2tpp	CYNTtex	CRNt7pp	6APAt1
hdcea[c]	EX_cit_e	NMNPtpp	CYSDtex	CRNt8pp	A5PISO
pe161[c]	EX_cl_e	NOtpp	CYSItex	CSNt2pp	AACPS1
ocdca[c]	EX_cm_e	NOVBCNtpp	CYStex	CTBTt2rpp	AACPS2
pe180[c]	EX_cmp_e	NTPP1	CYTDtex	CU1Opp	AACPS3
ocdcea[c]	EX_co2_e	NTPP10	D_LACtex	CYNTt2pp	AACPS4
pe181[c]	EX_cobalt2_e	NTPP11	DADNtex	CYSabc2pp	AACPS5
2agpg120[p]	EX_colipa20Oag_e	NTPP2	DALAtex	CYTBD2pp	AACPS6
2agpg120[c]	EX_colipaOA_e	NTPP3	DAMPtex	CYTBDpp	AACPS7
2agpg140[p]	EX_cpgn_e	NTPP4	DAPtex	CYTBO3_4pp	AACPS8
2agpg140[c]	EX_cpgn_un_e	NTPP5	DARBtex	CYTDt2pp	AACPS9
2agpg141[p]	EX_crn__D_e	NTPP6	DCAtex	D_LACt2pp	AACTOOR
2agpg141[c]	EX_crn_e	NTPP7	DCMPtex	DADNt2pp	AADDGT
2agpg160[p]	EX_cs1_e	NTPP8	DCYTtex	DALAt2pp	AAMYL
2agpg160[c]	EX_csn_e	NTPP9	DDCAtexi	DARBt2rpp	AB6PGH
2agpg161[p]	EX_cu_e	O2tpp	DDGLCNtex	DARBt3ipp	ABTA
2agpg161[c]	EX_cu2_e	PItpp	DGMPtex	DCYTt2pp	ABUTD
2agpg180[p]	EX_cyan_e	PPALtpp	DGSNtex	DDCAt2pp	ACACCT
2agpg180[c]	EX_cynt_e	PRATPP	DHAtex	DDGLCNt2rpp	ACACT1r
2agpg181[p]	EX_cys__D_e	PSURItpp	DIMPtex	DGSNt2pp	ACACT2r
2agpg181[c]	EX_cys__L_e	PYDAMtpp	DINStex	DINSt2pp	ACACT3r
pg120[c]	EX_cysi__L_e	PYDXNtpp	DMSOtex	DMSOR1pp	ACACT4r
pg140[c]	EX_cytd_e	PYDXtpp	DMStex	DMSOR2pp	ACACT5r
pg141[c]	EX_dad_2_e	QUIN2tpp	DOPAtex	DSERt2pp	ACACT6r
pg160[c]	EX_damp_e	RFAMPtpp	DOXRBCNtex	DURIPP	ACACT7r
pg161[c]	EX_dca_e	RMNtpp	DRIBtex	DURIt2pp	ACACT8r
pg180[c]	EX_dcmp_e	RNAMtpp	DSERtex	E4PP	ACALD
pg181[c]	EX_dcyt_e	SELtpp	DTMPtex	ECA4OALpp	ACANTHAT
2dglc[e]	EX_ddca_e	SERtpp	DUMPtex	ECAP1pp	ACBIPGT
2dglc[p]	EX_dgmp_e	SLNTtpp	DURItex	ECAP2pp	ACCOAC
2dhguln[c]	EX_dgsn_e	SO2tpp	DXYLONtex	ECAP3pp	ACCOAL
nadh[c]	EX_dha_e	SUCASPtpp	DXYLUDtex	ETHAt2pp	ACGAL6PI
nad[c]	EX_dhps_e	SUCFUMtpp	ECA4COLIPAabctex	ETOHtrpp	ACGAL6PISO
glcn[c]	EX_diact_e	SUCMALtpp	ENLIPAabctex	F1PP	ACGAMK
idon__L[c]	EX_dimp_e	SUCTARTtpp	ETHAtex	F6PP	ACGAMT
2doxg6p[c]	EX_din_e	TTRCYCtpp	ETHSO3tex	F6Pt6_2pp	ACGK
2dglc[c]	EX_dms_e	UDCPPtppi	ETOHtex	FACOAL100t2pp	ACGS
gthrd[c]	EX_dmso_e	ULA4Ntppi	F6Ptex	FACOAL120t2pp	ACHBS
dtgcl[c]	EX_dopa_e	URATEtpp	FADtex	FACOAL140t2pp	ACKr
mercpeth[c]	EX_doxrbcn_e	URAtpp	FALDtex	FACOAL141t2pp	ACLS
gthox[c]	EX_drib_e	UREAtpp	FE2tex	FACOAL160t2pp	ACM6PH
2hh24dd[c]	EX_dtmp_e	XANtpp	FE3DCITexs	FACOAL161t2pp	ACMAMUT
4h2kpi[c]	EX_dump_e	ZN2tpp	FE3HOXUtex	FACOAL180t2pp	ACNML
24dhhed[c]	EX_duri_e	14GLUCANabcpp	FE3tex	FACOAL181t2pp	ACOAD1f
2hptcoa[c]	EX_dxyl_e	3PEPTabcpp	FECRMUtex	FACOAL60t2pp	ACOAD2f
2hptcl[c]	EX_dxylnt_e	4PEPTabcpp	FEENTERtex	FACOAL80t2pp	ACOAD3f
coa[c]	EX_eca4colipa_e	ADOCBLabcpp	FEOXAMUtex	FDH4pp	ACOAD4f
2mahmp[c]	EX_enlipa_e	AI2abcpp	FMNtex	FDH5pp	ACOAD5f
4ampm[c]	EX_enter_e	ALAabcpp	FOAMtex	FE2t2pp	ACOAD6f
2pg[e]	EX_etha_e	ALAALAabcpp	FORtex	FE2t3pp	ACOAD7f
2pg[p]	EX_ethso3_e	ALLabcpp	FRULYStex	FEROpp	ACOAD8f
2hphaccoa[c]	EX_etoh_e	ARBabcpp	FRUtex	FORt2pp	ACOATA
2hyoxplac[c]	EX_f6p_e	ARBTNabcpp	FRUURtex	FRULYSt2pp	ACODA
34dhpac[c]	EX_fad_e	ARGabcpp	Ftex	FRUpts2pp	ACONIs
34dhpha[c]	EX_fald_e	ASNabcpp	FUCtex	FRUptspp	ACONMT
34dhpac[e]	EX_fe_e	ASPabcpp	FUMtex	FRUURt2rpp	ACONTa
34dhpac[p]	EX_fe2_e	BUTSO3abcpp	FUSAtex	FUMt2_2pp	ACONTb
34dhphaccoa[c]	EX_fe3_e	CBIuabcpp	G1Ptex	FUMt2_3pp	ACOTA
35dhphaccoa[c]	EX_fe3dcit_e	CBL1abcpp	G3PCtex	G1PP	ACOXT
35dhpha[c]	EX_fe3dhbzs_e	CD2abcpp	G3PEtex	G1PPpp	ACPPAT120
3amac[c]	EX_fe3dhbzs3_e	CGLYabcpp	G3PGtex	G2PP	ACPPAT140
nh4[c]	EX_fe3hox_e	CHLabcpp	G3PItex	G2PPpp	ACPPAT141
msa[c]	EX_fe3hox_un_e	COBALT2abcpp	G3PStex	G6PP	ACPPAT160
3amp[e]	EX_fecrm_e	COLIPAabcpp	G6Ptex	G6Pt6_2pp	ACPPAT161
3cmp[e]	EX_fecrm_un_e	CPGNabcpp	GAL1Ptex	GAL1PPpp	ACPPAT180
3gmp[e]	EX_feenter_e	CRNabcpp	GALAMtex	GALAMPTSpp	ACPPAT181
3hdecACP[c]	EX_feoxam_e	CRNDabcpp	GALBDtex	GALCTNLt2pp	ACPS1
tdec2eACP[c]	EX_feoxam_un_e	CTBTabcpp	GALCTNLtex	GALCTNt2pp	ACS
3hddecACP[c]	EX_feroxB_e	CU1abcpp	GALCTNtex	GALCTt2rpp	ADA
tddec2eACP[c]	EX_feroxBfe_e	CU2abcpp	GALCTtex	GALM2pp	ADCL
3hcddec5eACP[c]	EX_feroxE_e	CYSabcpp	GALtex	GALt2pp	ADCS
t3c5ddeceACP[c]	EX_feroxEfe_e	CYSDabcpp	GALTtex	GALTptspp	ADD
3hmrsACP[c]	EX_feroxG_e	CYSIabcpp	GALURtex	GALURt2rpp	ADK1
tmrs2eACP[c]	EX_feroxGfe_e	DAPabcpp	GAMAN6Ptex	GAM6Pt6_2pp	ADK3
3hcmrs7eACP[c]	EX_fmn_e	DARBabcpp	GAMtex	GAMptspp	ADK4
t3c7mrseACP[c]	EX_for_e	DHBSZ3FEabcpp	GBBTNtex	GAPP	ADMDC
3hpalmACP[c]	EX_frmd_e	ETHSO3abcpp	GDPtex	GLCDpp	ADNCYC
tpalm2eACP[c]	EX_fru_e	FE2abcpp	GLCNtex	GLCNt2rpp	ADNK1
3hcpalm9eACP[c]	EX_frulys_e	FE3abcpp	GLCRtex	GLCptspp	ADNUC
t3c9palmeACP[c]	EX_fruur_e	FE3DCITabcpp	GLCtex	GLCRt2rpp	ADOCBIK
3hoctaACP[c]	EX_fuc__L_e	FE3DHBZSabcpp	GLCUR1Ptex	GLCt2pp	ADOCBLPS
toctd2eACP[c]	EX_fum_e	FE3HOXabcpp	GLCURtex	GLCURt2rpp	ADOCBLS
3hcvac11eACP[c]	EX_fusa_e	FECRMabcpp	GLNtex	GLUABUTt7pp	ADOCBLtonex
t3c11vaceACP[c]	EX_g1p_e	FEENTERabcpp	GLUtex	GLUNpp	ADPRDP
3haACP[c]	EX_g3pc_e	FEOXAMabcpp	GLYALDtex	GLUt2rpp	ADPT
but2eACP[c]	EX_g3pe_e	G3PCabcpp	GLYBtex	GLUt4pp	ADSK
3hhexACP[c]	EX_g3pg_e	G3PEabcpp	GLYC2Ptex	GLYBt2pp	ADSL1r
thex2eACP[c]	EX_g3pi_e	G3PGabcpp	GLYC3Ptex	GLYC3Pt6pp	ADSL2r
3hoctACP[c]	EX_g3ps_e	G3PIabcpp	GLYCAtex	GLYCAt2rpp	ADSS
toct2eACP[c]	EX_g6p_e	G3PSabcpp	GLYCLTtex	GLYCLTt2rpp	AGDC
3hibutcoa[c]	EX_gal_bD_e	GALabcpp	GLYCtex	GLYCLTt4pp	AGM3PA
3hmp[c]	EX_gal_e	GLCabcpp	GLYtex	GLYt4pp	AGM3PH
3hbzcoa[c]	EX_gal1p_e	GLNabcpp	GMPtex	GPDDA1pp	AGM4PA
3hbz[c]	EX_galam_e	GLUabcpp	GSNtex	GPDDA2pp	AGM4PCP
o2[c]	EX_galct__D_e	GLYBabcpp	GTHOXtex	GPDDA3pp	AGM4PH
3hcinnm[c]	EX_galctn__D_e	GLYC2Pabcpp	GTHRDtex	GPDDA4pp	AGMH
dhcinnm[c]	EX_galctn__L_e	GLYC3Pabcpp	GTPtex	GPDDA5pp	AGMHE
3hoxpac[p]	EX_galt_e	GTHRDabcpp	GUAtex	GSNt2pp	AGMT
3hoxpac[c]	EX_galur_e	HG2abcpp	GULNLtex	GTHRDabc2pp	AGPAT120
3hoxpac[e]	EX_gam_e	HISabcpp	H2O2tex	GTHRDHpp	AGPAT140
3hpp[c]	EX_gam6p_e	ILEabcpp	H2Otex	GUAt2pp	AGPAT141
3hpppn[c]	EX_gbbtn_e	ISETACabcpp	H2Stex	GUR1PPpp	AGPAT160
dhpppn[c]	EX_gdp_e	K2L4Aabcpp	H2tex	H2St1pp	AGPAT161
3hpp[e]	EX_glc__D_e	Kabcpp	HCINNMtex	HCINNMt2rpp	AGPAT180
3hpp[p]	EX_glcn_e	LEUabcpp	HDCAtexi	HDCAt2pp	AGPAT181
3dhguln[c]	EX_glcr_e	LIPAabcpp	HDCEAtexi	HEXt2rpp	AGPR
3dhgulnp[c]	EX_glcur_e	LIPACabcpp	HG2tex	HG2t3pp	AGt3
uri[p]	EX_glcur1p_e	LYSabcpp	HIStex	HISt2rpp	AH6PI
pi[p]	EX_gln__L_e	MALTabcpp	HOMtex	HOMt2pp	AHCYSNS
cytd[p]	EX_glu__L_e	MALTHXabcpp	HPAtex	HPPPNt2rpp	AHGDx
adn[p]	EX_gly_e	MALTPTabcpp	HPPPNtex	HYD1pp	AI2K
gsn[p]	EX_glyald_e	MALTTRabcpp	Htex	HYD2pp	AICART
o2[p]	EX_glyb_e	MALTTTRabcpp	HXAtex	HYD3pp	AIRC2
3ntym[p]	EX_glyc__R_e	METabcpp	HYXNtex	IDONt2rpp	AIRC3
nh4[p]	EX_glyc_e	METDabcpp	ICITtex	ILEt2rpp	AKGDH
h2o2[p]	EX_glyc2p_e	METSOX1abcpp	IDONtex	INDOLEt2pp	ALAALAD
4h3npacald[p]	EX_glyc3p_e	METSOX2abcpp	ILEtex	INDOLEt2rpp	ALAALAr
3odecACP[c]	EX_glyclt_e	MG2uabcpp	IMPtex	INSt2pp	ALAGLUE
3oddecACP[c]	EX_gmp_e	MOBDabcpp	INDOLEtex	KDOPP	ALAR
3ocddec5eACP[c]	EX_gsn_e	MSO3abcpp	INStex	Kt2pp	ALATA_D2
3omrsACP[c]	EX_gthox_e	NI2abcpp	INSTtex	Kt3pp	ALATA_L
3ocmrs7eACP[c]	EX_gthrd_e	NI2uabcpp	ISETACtex	L_LACt2rpp	ALATA_L2
3opalmACP[c]	EX_gtp_e	ORNabcpp	K2L4Aabctex	LACZpp	ALATRS
3ocpalm9eACP[c]	EX_gua_e	PA120abcpp	Ktex	LCTSt3ipp	ALCD19
3ooctdACP[c]	EX_guln__L_e	PA140abcpp	L_LACtex	LEUt2rpp	ALCD2x
3ocvac11eACP[c]	EX_h_e	PA141abcpp	LALADGLUtex	LEUt4rpp	ALDD19xr
actACP[c]	EX_h2_e	PA160abcpp	LALALGLUtex	LIPOt2pp	ALDD2x
3ohexACP[c]	EX_h2o_e	PA161abcpp	LCTStex	LPLIPAL1A120pp	ALDD2y
3ooctACP[c]	EX_h2o2_e	PA180abcpp	LEUtex	LPLIPAL1A140pp	ALDD3y
ocACP[c]	EX_h2s_e	PA181abcpp	LIPAabctex	LPLIPAL1A141pp	ALDD4
malACP[c]	EX_hacolipa_e	PE120abcpp	LIPAHTex	LPLIPAL1A160pp	ALKP
co2[c]	EX_halipa_e	PE140abcpp	LIPOtex	LPLIPAL1A161pp	ALLK
ACP[c]	EX_hdca_e	PE141abcpp	LYStex	LPLIPAL1A180pp	ALLPI
dcaACP[c]	EX_hdcea_e	PE160abcpp	LYXtex	LPLIPAL1A181pp	ALLTAMH
cdec3eACP[c]	EX_hg2_e	PE161abcpp	MALDtex	LPLIPAL1E120pp	ALLTN
ddcaACP[c]	EX_his__L_e	PE180abcpp	MALtex	LPLIPAL1E140pp	ALLULPE
cddec5eACP[c]	EX_hom__L_e	PE181abcpp	MALTHXtexi	LPLIPAL1E141pp	ALR2
myrsACP[c]	EX_hxa_e	PG120abcpp	MALTPTtexi	LPLIPAL1E160pp	ALR4x
tdeACP[c]	EX_hxan_e	PG140abcpp	MALTtexi	LPLIPAL1E161pp	ALTRH
palmACP[c]	EX_icit_e	PG141abcpp	MALTTRtexi	LPLIPAL1E180pp	AM3PA
hdeACP[c]	EX_idon__L_e	PG160abcpp	MALTTTRtexi	LPLIPAL1E181pp	AM4PA
butACP[c]	EX_ile__L_e	PG161abcpp	MAN6Ptex	LPLIPAL1G120pp	AM4PCP
hexACP[c]	EX_imp_e	PG180abcpp	MANGLYCtex	LPLIPAL1G140pp	AMALT1
oxadpcoa[c]	EX_indole_e	PG181abcpp	MANtex	LPLIPAL1G141pp	AMALT2
accoa[c]	EX_inost_e	PGP120abcpp	MELIBtex	LPLIPAL1G160pp	AMALT3
succoa[c]	EX_ins_e	PGP140abcpp	MEOHtex	LPLIPAL1G161pp	AMALT4
LalaDgluMdap[p]	EX_isetac_e	PGP141abcpp	MEPNtex	LPLIPAL1G180pp	AMANAPEr
LalaDgluMdap[c]	EX_k_e	PGP160abcpp	METDtex	LPLIPAL1G181pp	AMANK
LalaDgluMdap[e]	EX_kokdolipidA_e	PGP161abcpp	METGLCURtex	LYSt2pp	AMAOTr
3pg[e]	EX_lac__D_e	PGP180abcpp	METSOX1tex	LYSt3pp	AMMQLT8
3pg[p]	EX_lac__L_e	PGP181abcpp	METSOX2tex	LYXt2pp	AMMQT8_2
h2[c]	EX_LalaDglu_e	PHEMEabcpp	METtex	MALDt2_2pp	AMPMS2
phaccoa[c]	EX_LalaDgluMdap_e	PIuabcpp	MG2tex	MALt2_2pp	AMPN
3dhphaccoa[c]	EX_LalaDgluMdapDala_e	PROabcpp	MINCYCtex	MALt3pp	AMPTASECG
3hphaccoa[c]	EX_LalaLglu_e	PROGLYabcpp	MINOHPtexi	MALTptspp	AMPTASEPG
sla[c]	EX_lcts_e	PTRCabcpp	MMETtex	MAN6Pt6_2pp	ANHMK
dhps[c]	EX_leu__L_e	RIBabcpp	MNLtex	MANGLYCptspp	ANPRT
3ump[e]	EX_lipoate_e	SALCHS2FEabcpp	MNtex	MANptspp	ANS
dopa[p]	EX_lys__L_e	SALCHS4FEabcpp	MOBDtex	MCTP1App	AOBUTDs
4abzglu[c]	EX_lyx__L_e	SPMDabcpp	MSO3tex	MCTP1Bpp	AOXSr2
glu__L[c]	EX_mal__D_e	SULabcpp	N2Otex	MCTP2App	AP4AH
4abz[c]	EX_mal__L_e	SULFACabcpp	NACtex	MDDCP1pp	AP4AS
4abzglu[e]	EX_malt_e	TAURabcpp	NAtex	MDDCP2pp	AP5AH
4abzglu[p]	EX_malthx_e	THMabcpp	NH4tex	MDDCP3pp	APCS
sucsal[c]	EX_maltpt_e	THRabcpp	NI2tex	MDDCP4pp	APG3PAT120
pyr[c]	EX_malttr_e	TSULabcpp	NMNtex	MDDCP5pp	APG3PAT140
4h3npacald[c]	EX_maltttr_e	TUNGSabcpp	NO2tex	MDDEP1pp	APG3PAT141
4h3npac[c]	EX_man_e	VALabcpp	NO3tex	MDDEP2pp	APG3PAT160
4hoxpacd[c]	EX_man6p_e	XYLabcpp	NOtex	MDDEP3pp	APG3PAT161
4hphac[c]	EX_manglyc_e	ZN2abcpp	NOVBCNtex	MDDEP4pp	APG3PAT180
4hbz[c]	EX_melib_e	ZNabcpp	O16A4COLIPAabctex	MELIBt2pp	APG3PAT181
4hbz[p]	EX_meoh_e		O2Stex	MELIBt3ipp	APH120
4hoxpacd[e]	EX_mepn_e		O2tex	MEOHtrpp	APH140
4hoxpacd[p]	EX_met__D_e		OAAtex	METGLCURt2pp	APH141
fadh2[c]	EX_met__L_e		OCDCAtexi	METt3pp	APH160
fad[c]	EX_metglcur_e		OCDCEAtexi	MG2t3_2pp	APH161
4hphac[p]	EX_metsox_R__L_e		OCTAtex	MI1PP	APH180
4hthr[c]	EX_metsox_S__L_e		ORNtex	MLDCP1App	APH181
gly[c]	EX_mg2_e		OROTtex	MLDCP1Bpp	APPLDHr
gcald[c]	EX_mincyc_e		PACALDtex	MLDCP2App	APRAUR
phthr[c]	EX_minohp_e		PEAMNtex	MLDCP2Bpp	ARABDI
4hthr[e]	EX_mmet_e		PHEtex	MLDCP3App	ARAI
4hthr[p]	EX_mn2_e		PItex	MLDEP1pp	ARBTNexs
LalaDgluMdapDala[c]	EX_mnl_e		PNTOtex	MLDEP2pp	ARBTNR1
ala__D[c]	EX_mobd_e		PPALtex	MLTGY1pp	ARBTNR2
LalaDgluMdapDala[p]	EX_mso3_e		PPAtex	MLTGY2pp	ARBTNR3
ala__D[p]	EX_mththf_e		PPPNtex	MLTGY3pp	ARBTNtonex
LalaDgluMdapDala[e]	EX_n2o_e		PPTtex	MLTGY4pp	ARGDC
hphaccoa[c]	EX_na1_e		PROGLYtex	MMETt2pp	ARGSL
5dglcn[p]	EX_nac_e		PROtex	MN2t3pp	ARGSS
5dglcn[c]	EX_nh4_e		PSCLYStex	MN6PP	ARGTRS
5dglcn[e]	EX_ni2_e		PSERtex	MNLptspp	ARHGDx
dad_5[c]	EX_nmn_e		PSURItex	MNt2pp	ARMEPNS
5drib[c]	EX_no_e		PTRCtex	NADH16pp	ASAD
ade[c]	EX_no2_e		PYDAMtex	NADH17pp	ASCBPL
5mtr[e]	EX_no3_e		PYDXNtex	NADH18pp	ASNN
5mtr[p]	EX_novbcn_e		PYDXtex	NAMNPP	ASNS1
5mtr[c]	EX_o2_e		PYRtex	NAt3_1p5pp	ASNS2
6apa[e]	EX_o2s_e		QUIN2tex	NAt3_2pp	ASNTRS
6apa[p]	EX_o6a4colipa_e		R5Ptex	NAt3pp	ASP1DC
ru5p__D[c]	EX_oaa_e		RAFFtex	NI2t3pp	ASPCT
ara5p[c]	EX_ocdca_e		RFAMPtex	NMNt7pp	ASPK
octeACP[c]	EX_ocdcea_e		RIBtex	NO2t2rpp	ASPO3
ocdcaACP[c]	EX_octa_e		RMNtex	NO3R1bpp	ASPO4
dca[c]	EX_orn_e		SALCHSXtex	NO3R1pp	ASPO5
octa[c]	EX_orot_e		SALCNtex	NO3R2bpp	ASPO6
aact[c]	EX_pac_e		SBTtex	NO3R2pp	ASPT
mthgxl[c]	EX_pacald_e		SELtex	NO3t7pp	ASPTA
h2o2[c]	EX_peamn_e		SERtex	NTD10pp	ASPTRS
unagamu[c]	EX_peng_e		SKMtex	NTD11pp	ASR
dtdp4aaddg[c]	EX_pep_e		SLNTtex	NTD12pp	AST
unagamuf[c]	EX_phe__L_e		SO2tex	NTD1pp	ATHRDHr
dtdp[c]	EX_pheme_e		SO3tex	NTD2pp	ATPHs
malthx[c]	EX_pi_e		SO4tex	NTD3pp	ATPM
malthx[p]	EX_pnto__R_e		SPMDtex	NTD4pp	BETALDHx
arbt6p[c]	EX_ppa_e		SUCCtex	NTD5pp	BETALDHy
g6p[c]	EX_ppal_e		SUCRtex	NTD6pp	BGLA1
hqn[c]	EX_pppn_e		SULFACtex	NTD7pp	BIOMASS_Ec_iML1515_core_75p37M
akg[c]	EX_ppt_e		TAGtex	NTD8pp	BIOMASS_Ec_iML1515_WT_75p37M
4abut[c]	EX_pro__L_e		TARTRDtex	NTD9pp	BMOCOS
4abutn[c]	EX_progly_e		TARTRtex	NTP3pp	BMOGDS1
4abut[p]	EX_psclys_e		TAURtex	NTRIR3pp	BMOGDS2
4abut[e]	EX_pser__L_e		TCYNTtex	NTRIR4pp	BPNT
acac[c]	EX_ptrc_e		TETtex	OAAt2_2pp	BSORx
ac[c]	EX_pydam_e		THMDtex	OCDCAt2pp	BSORy
aacoa[c]	EX_pydx_e		THMtex	OCDCEAt2pp	BTS5
acac[p]	EX_pydxn_e		THRPtex	OROTt2_2pp	BUTCT
btcoa[c]	EX_pyr_e		THRtex	PACALDt2rpp	BWCOGDS1
3ohcoa[c]	EX_quin_e		THYMtex	PAPA120pp	BWCOGDS2
hxcoa[c]	EX_r5p_e		TMAOtex	PAPA140pp	BWCOS
3oocoa[c]	EX_raffin_e		TMAtex	PAPA141pp	CAT
occoa[c]	EX_rbt_e		TREtex	PAPA160pp	CBIAT
3odcoa[c]	EX_remnant1_e		TRPtex	PAPA161pp	CBItonex
dcacoa[c]	EX_rfamp_e		TSULtex	PAPA180pp	CBL1tonex
3oddcoa[c]	EX_rib__D_e		TTDCAtexi	PAPA181pp	CBLAT
ddcacoa[c]	EX_rmn_e		TTDCEAtexi	PDXPP	CBMD
3otdcoa[c]	EX_rnam_e		TTRCYCtex	PEAMNOpp	CBMKr
tdcoa[c]	EX_salchs2_e		TUNGStex	PETNT161pp	CBPS
3ohdcoa[c]	EX_salchs2fe_e		TYMtex	PETNT181pp	CCGS
3ohodcoa[c]	EX_salchs4_e		TYRPtex	PGPP120pp	CDAPPA120
pmtcoa[c]	EX_salchs4fe_e		TYRtex	PGPP140pp	CDAPPA140
acac[e]	EX_salchsx_e		UACGAMtex	PGPP141pp	CDAPPA141
acald[c]	EX_salcn_e		UDPACGALtex	PGPP160pp	CDAPPA160
acald[e]	EX_sbt__D_e		UDPGALtex	PGPP161pp	CDAPPA161
acald[p]	EX_sel_e		UDPGLCURtex	PGPP180pp	CDAPPA180
anth[c]	EX_ser__D_e		UDPGtex	PGPP181pp	CDAPPA181
acanth[c]	EX_ser__L_e		UMPtex	PHEt2rpp	CDGR
gtp[c]	EX_skm_e		URATEtex	PHYTSpp	CDGS
adocbip[c]	EX_slnt_e		URAtex	PIt2rpp	CDGUNPD
agdpcbi[c]	EX_so2_e		UREAtex	PLIPA1A120pp	CDPMEK
hco3[c]	EX_so3_e		URItex	PLIPA1A140pp	CDPPH
malcoa[c]	EX_so4_e		VALtex	PLIPA1A141pp	CELBpts
ppa[c]	EX_spmd_e		XANtex	PLIPA1A160pp	CFAS160E
ppcoa[c]	EX_sq_e		XMPtex	PLIPA1A161pp	CFAS160G
acgal1p[p]	EX_succ_e		XTSNtex	PLIPA1A180pp	CFAS180E
acgal[p]	EX_sucr_e		XYLtex	PLIPA1A181pp	CFAS180G
acgal1p[e]	EX_sulfac_e		XYLUtex	PLIPA1E120pp	CHITOBpts
acgal6p[c]	EX_tag__D_e		Zn2tex	PLIPA1E140pp	CHITPH
tag6p__D[c]	EX_tartr__D_e			PLIPA1E141pp	CHOLD
galam6p[c]	EX_tartr__L_e			PLIPA1E160pp	CHOLID
pep[c]	EX_taur_e			PLIPA1E161pp	CHORM
acgal[e]	EX_tcb_e			PLIPA1E180pp	CHORS
acgam1p[p]	EX_tcynt_e			PLIPA1E181pp	CHRPL
acgam[p]	EX_tet_e			PLIPA1G120pp	CINNDO
acgam1p[e]	EX_thm_e			PLIPA1G140pp	CITL
acgam[c]	EX_thr__L_e			PLIPA1G141pp	CMCMSAD
acgam6p[c]	EX_thrp_e			PLIPA1G160pp	CMHMI
uacgam[c]	EX_thym_e			PLIPA1G161pp	CMPN
udcpp[c]	EX_thymd_e			PLIPA1G180pp	CPGNexs
ump[c]	EX_tma_e			PLIPA1G181pp	CPGNR1
unaga[c]	EX_tmao_e			PLIPA2A120pp	CPGNR2
acgam[e]	EX_tre_e			PLIPA2A140pp	CPGNR3
acglu[c]	EX_trp__L_e			PLIPA2A141pp	CPGNtonex
acg5p[c]	EX_tsul_e			PLIPA2A160pp	CPH4S
2obut[c]	EX_ttdca_e			PLIPA2A161pp	CPL
2ahbut[c]	EX_ttdcea_e			PLIPA2A180pp	CPMPS
actp[c]	EX_tton_e			PLIPA2A181pp	CPPPGO
alac__S[c]	EX_ttrcyc_e			PLIPA2E120pp	CPPPGO2
acmum6p[c]	EX_tungs_e			PLIPA2E140pp	CRNBTCT
lac__D[c]	EX_tym_e			PLIPA2E141pp	CRNCAL2
uacmamu[c]	EX_tyr__L_e			PLIPA2E160pp	CRNCAR
udp[c]	EX_tyrp_e			PLIPA2E161pp	CRNCBCT
acmana[p]	EX_uacgam_e			PLIPA2E180pp	CRNCDH
acmanap[c]	EX_udcpo4_e			PLIPA2E181pp	CRNDCAL2
acmana[e]	EX_udcpo5_e			PLIPA2G120pp	CS
acmum[p]	EX_udpacgal_e			PLIPA2G140pp	CSND
acmum[e]	EX_udpg_e			PLIPA2G141pp	CTBTCAL2
acnam[p]	EX_udpgal_e			PLIPA2G160pp	CTECOAI6
acnam[c]	EX_udpglcur_e			PLIPA2G161pp	CTECOAI7
acnam[e]	EX_ump_e			PLIPA2G180pp	CTECOAI8
acmana[c]	EX_ura_e			PLIPA2G181pp	CTPS2
b2coa[c]	EX_urate_e			PNTOt4pp	CURR
hx2coa[c]	EX_urea_e			PPAt4pp	CUt3
oc2coa[c]	EX_uri_e			PPPNt2rpp	CXSAMS
dc2coa[c]	EX_val__L_e			PPTHpp	CYANST
dd2coa[c]	EX_xan_e			PROt2rpp	CYNTAH
td2coa[c]	EX_xmp_e			PROt4pp	CYSDDS
hdd2coa[c]	EX_xtsn_e			PSCLYSt2pp	CYSDS
stcoa[c]	EX_xyl__D_e			PSP_Lpp	CYSS
od2coa[c]	EX_xylu__L_e			PTHRpp	CYSSADS
acACP[c]	EX_zn2_e			PTRCORNt7pp	CYSTA
acorn[c]				PTRCt2pp	CYSTL
orn[c]				PYDXPP	CYSTRS
acolipa[p]				PYRt2rpp	CYTD
acolipa[e]				R5PP	CYTDH
acon__T[c]				R5PPpp	CYTDK1
acon__C[c]				RU5PP	CYTDK2
amet[c]				RZ5PP	CYTK1
ahcys[c]				SBTptspp	CYTK2
aconm[c]				SERt2rpp	DAAD
cit[c]				SERt4pp	DADA
icit[c]				SKMt2pp	DADK
acg5sa[c]				SO4t2pp	DAGK120
oxa[c]				SPMDt3pp	DAGK140
oxalcoa[c]				SPODMpp	DAGK141
ddcap[c]				SUCCt2_2pp	DAGK160
ttdcap[c]				SUCCt2_3pp	DAGK161
ttdceap[c]				SUCCt3pp	DAGK180
hdcap[c]				SUCptspp	DAGK181
hdceap[c]				TARTRt7pp	DAPAL
ocdcap[c]				TARTt2_3pp	DAPDC
ocdceap[c]				THD2pp	DAPE
apoACP[c]				THMDt2pp	DASYN120
pap[c]				THRt2pp	DASYN140
acser[e]				THRt2rpp	DASYN141
acser[p]				THRt4pp	DASYN160
acser[c]				THYMt3pp	DASYN161
ac[p]				TMAOR1pp	DASYN180
na1[p]				TMAOR2pp	DASYN181
na1[c]				TMDPP	DATPHs
ac[e]				TMPPP	DB4PS
adn[c]				TRE6PP	DBTS
ins[c]				TREHpp	DC6PDA
4adcho[c]				TREptspp	DC6PH
chor[c]				TRPt2rpp	DCTPD
gln__L[c]				TTDCAt2pp	DCYTD
hxan[c]				TYROXDApp	DDGALK
ade[p]				TYRPpp	DDGLK
ade[e]				TYRt2rpp	DDPA
gdp[c]				UACGALPpp	DDPGALA
itp[c]				UACGAMPpp	DGK1
idp[c]				UDCPDPpp	DGUNC
ametam[c]				UDPGALPpp	DHACOAH
camp[c]				UDPGPpp	DHAD1
adn[e]				UGLCURPpp	DHAD2
rib__D[c]				URAt2pp	DHAPT
adocbi[c]				URIt2pp	DHBD
adocbl[p]				VALt2rpp	DHBS
adocbl[c]				VALt3pp	DHBSH
adocblp[c]				XANt2pp	DHCIND
5prdmbz[c]				XTSNt2rpp	DHCINDO
gmp[c]				XYLt2pp	DHCURR
rdmbzi[c]				XYLUt2pp	DHDPRy
adocbl[e]				ZN2t3pp	DHDPS
adprib[c]					DHEDAA
r5p[c]					DHFR
prpp[c]					DHFS
aps[c]					DHGLYH
paps[c]					DHMPTR
dcamp[c]					DHNAOT4
fum[c]					DHNCOAS
25aics[c]					DHNCOAT
aicar[c]					DHNPA2r
asp__L[c]					DHNPTE
imp[c]					DHORD2
2ameph[e]					DHORD5
2ameph[p]					DHORDfum
gam6p[c]					DHORTS
anhgm3p[c]					DHPDO
anhgm[c]					DHPPD
anhgm3p[p]					DHPPDA2
anhgm[p]					DHPS2
anhm3p[c]					DHPTDCs
anhgm4p[c]					DHPTDCs2
anhgm4p[p]					DHPTDNR
anhm4p[c]					DHPTDNRN
anhm[c]					DHPTPE
adphep_DD[c]					DHQS
adphep_LD[c]					DHQTi
agm[c]					DKGLCNR1
urea[c]					DKGLCNR2x
ptrc[c]					DM_4crsol_c
agm[e]					DM_5drib_c
agm[p]					DM_aacald_c
1ddecg3p[c]					DM_amob_c
pa120[c]					DM_lipidA_core_e_p
1tdecg3p[c]					DM_mththf_c
pa140[c]					DM_oxam_c
1tdec7eg3p[c]					DMALRED
pa141[c]					DMATT
1hdecg3p[c]					DMPPS
pa160[c]					DMQMT
1hdec9eg3p[c]					DMSOR1
pa161[c]					DMSOR2
1odecg3p[c]					DNMPPA
pa180[c]					DOGULNR
1odec11eg3p[c]					DPCOAK
pa181[c]					DPR
h[e]					DRPA
ag[c]					DSBAO1
ag[e]					DSBAO2
ah6p__D[c]					DSBCGT
f6p[c]					DSBDR
rhcys[c]					DSBGGT
S2hglut[c]					DSCLCOCH
mththf[p]					DSERDHr
mththf[c]					DTARTD
dhptd[c]					DTMPK
dhptdp[c]					DURADx
mththf[e]					DURIK1
10fthf[c]					DUTPDP
thf[c]					DXPRIi
fprica[c]					DXPS
air[c]					DXYLK
5caiz[c]					E4PD
5aizc[c]					EAR100x
airs[e]					EAR100y
airs[p]					EAR120x
airs[c]					EAR120y
akg[p]					EAR121x
akg[e]					EAR121y
ala__L[p]					EAR140x
ala__L[c]					EAR140y
alaala[p]					EAR141x
alaala[c]					EAR141y
alaala[e]					EAR160x
LalaDglu[c]					EAR160y
LalaLglu[c]					EAR161x
pydx5p[c]					EAR161y
pyam5p[c]					EAR180x
ala__L[e]					EAR180y
trnaala[c]					EAR181x
alatrna[c]					EAR181y
glyald[c]					EAR40x
glyc[c]					EAR40y
etoh[c]					EAR60x
pacald[c]					EAR60y
pac[c]					EAR80x
ppal[c]					EAR80y
btal[c]					ECOAH1
but[c]					ECOAH2
dhap[c]					ECOAH3
dha[c]					ECOAH4
all__D[p]					ECOAH5
all__D[c]					ECOAH6
all6p[c]					ECOAH7
allul6p[c]					ECOAH8
alltt[c]					EDA
urdglyc[c]					EDD
all__D[e]					EDTXS1
alltn[c]					EDTXS2
alltn[p]					EDTXS3
alltn[e]					EDTXS4
alpp[p]					EGMEACPR
pe160[p]					ENLIPIDAt1ex
lpp[p]					ENLIPIDAt2ex
pg160[p]					ENO
acetol[c]					ENTCS
altrn[c]					ENTERES
2ddglcn[c]					ENTERES2
malt[c]					ENTERH
malttr[c]					EPMEACPR
glc__D[c]					ETHAAL
maltttr[c]					EX_12ppd__R_e
maltpt[c]					EX_12ppd__S_e
malthp[c]					EX_13ppd_e
8aonn[c]					EX_14glucan_e
dann[c]					EX_15dap_e
amob[c]					EX_23camp_e
2dmmql8[c]					EX_23ccmp_e
mql8[c]					EX_23cgmp_e
2dmmq8[c]					EX_23cump_e
mqn8[c]					EX_23dappa_e
for[c]					EX_23dhbzs3_e
cgly[c]					EX_26dap__M_e
cys__L[c]					EX_2ddglcn_e
progly[c]					EX_2dglc_e
pro__L[c]					EX_2pg_e
amp[e]					EX_34dhpac_e
amp[p]					EX_3amp_e
anhgm[e]					EX_3cmp_e
pran[c]					EX_3gmp_e
2aobut[c]					EX_3hcinnm_e
pimACP[c]					EX_3hoxpac_e
ap4a[c]					EX_3hpp_e
ap5a[c]					EX_3hpppn_e
15dap[c]					EX_3ntym_e
5mta[c]					EX_3pg_e
na15dap[c]					EX_3ump_e
glyc3p[c]					EX_4abut_e
appl[c]					EX_4abz_e
5apru[c]					EX_4abzglu_e
5aprbu[c]					EX_4hoxpac_e
arab__D[c]					EX_4hoxpacd_e
rbl__D[c]					EX_4hphac_e
arab__L[c]					EX_4hthr_e
rbl__L[c]					EX_5dglcn_e
arab__L[p]					EX_5mtr_e
arab__L[e]					EX_6apa_e
arbtn_fe3[p]					EX_abt__D_e
arbtn_fe3[c]					EX_ac_e
arbtn[e]					EX_acac_e
fe3[e]					EX_acald_e
arbtn_fe3[e]					EX_acgal_e
fe2[c]					EX_acgal1p_e
arbtn[c]					EX_acgam_e
fmnh2[c]					EX_acgam1p_e
fmn[c]					EX_acmana_e
rbflvrd[c]					EX_acmum_e
ribflv[c]					EX_acnam_e
arbtn[p]					EX_acser_e
arbt[p]					EX_ade_e
arbt[e]					EX_adn_e
arg__L[p]					EX_adocbl_e
arg__L[c]					EX_AEP_e
co2[p]					EX_ag_e
orn[p]					EX_agm_e
argsuc[c]					EX_airs_e
citr__L[c]					EX_akg_e
arg__L[e]					EX_ala__D_e
trnaarg[c]					EX_ala__L_e
argtrna[c]					EX_ala_B_e
r2hglut[c]					EX_alaala_e
mepn[c]					EX_all__D_e
rpntp[c]					EX_alltn_e
aspsa[c]					EX_amp_e
4pasp[c]					EX_anhgm_e
ascb6p[c]					EX_arab__D_e
ascb__L[p]					EX_arab__L_e
ascb__L[e]					EX_arbt_e
asn__L[p]					EX_arbtn_e
asn__L[c]					EX_arbtn_fe3_e
asp__L[p]					EX_arg__L_e
asn__L[e]					EX_ascb__L_e
trnaasn[c]					EX_asn__L_e
asntrna[c]					EX_aso3_e
aso3[c]					EX_asp__L_e
aso3[p]					EX_btd_RR_e
aso3[e]					EX_btn_e
ala_B[c]					EX_but_e
cbp[c]					EX_butso3_e
cbasp[c]					EX_bz_e
q8[c]					EX_ca2_e
q8h2[c]					EX_cbi_e
iasp[c]					EX_cbl1_e
succ[c]					EX_cd2_e
oaa[c]					EX_cellb_e
asp__L[e]					EX_cgly_e
trnaasp[c]					EX_ch4_e
asptrna[c]					EX_chitob_e
aso4[c]					EX_chol_e
sucarg[c]					EX_chtbs_e
athr__L[c]					EX_cit_e
prbatp[c]					EX_cl_e
ala_B[p]					EX_cm_e
ala_B[e]					EX_cmp_e
betald[c]					EX_co2_e
glyb[c]					EX_cobalt2_e
6pgg[c]					EX_colipa20Oag_e
mn2[c]					EX_colipaOA_e
thr__L[c]					EX_cpgn_e
thmpp[c]					EX_cpgn_un_e
ni2[c]					EX_crn__D_e
ser__L[c]					EX_crn_e
sheme[c]					EX_cs1_e
ctp[c]					EX_csn_e
mg2[c]					EX_cu_e
met__L[c]					EX_cu2_e
zn2[c]					EX_cyan_e
tyr__L[c]					EX_cynt_e
dttp[c]					EX_cys__D_e
trp__L[c]					EX_cys__L_e
lys__L[c]					EX_cysi__L_e
dctp[c]					EX_cytd_e
utp[c]					EX_dad_2_e
k[c]					EX_damp_e
datp[c]					EX_dca_e
cobalt2[c]					EX_dcmp_e
ile__L[c]					EX_dcyt_e
fe3[c]					EX_ddca_e
udcpdp[c]					EX_dgmp_e
phe__L[c]					EX_dgsn_e
mlthf[c]					EX_dha_e
kdo2lipid4[e]					EX_dhps_e
cu2[c]					EX_diact_e
ca2[c]					EX_dimp_e
cl[c]					EX_din_e
murein5px4p[p]					EX_dms_e
pheme[c]					EX_dmso_e
2ohph[c]					EX_dopa_e
mobd[c]					EX_doxrbcn_e
his__L[c]					EX_drib_e
so4[c]					EX_dtmp_e
pe161[p]					EX_dump_e
2fe2s[c]					EX_duri_e
btn[c]					EX_dxyl_e
val__L[c]					EX_dxylnt_e
leu__L[c]					EX_eca4colipa_e
4fe4s[c]					EX_enlipa_e
dgtp[c]					EX_enter_e
mocogdp[c]					EX_etha_e
murein3px4p[p]					EX_ethso3_e
clpn161[p]					EX_etoh_e
murein3p3p[p]					EX_f6p_e
5mthf[c]					EX_fad_e
clpn160[p]					EX_fald_e
clpn181[p]					EX_fe_e
colipa[e]					EX_fe2_e
pe181[p]					EX_fe3_e
glycogen[c]					EX_fe3dcit_e
spmd[c]					EX_fe3dhbzs_e
hemeO[c]					EX_fe3dhbzs3_e
murein4p4p[p]					EX_fe3hox_e
pg181[p]					EX_fe3hox_un_e
mococdp[c]					EX_fecrm_e
lipopb[c]					EX_fecrm_un_e
murein4px4p[p]					EX_feenter_e
pg161[p]					EX_feoxam_e
murein4px4px4p[p]					EX_feoxam_un_e
enter[c]					EX_feroxB_e
mptamp[c]					EX_feroxBfe_e
moco[c]					EX_feroxE_e
bmoco[c]					EX_feroxEfe_e
bmoco1gdp[c]					EX_feroxG_e
bmocogdp[c]					EX_feroxGfe_e
btnso[c]					EX_fmn_e
btn[p]					EX_for_e
btn[e]					EX_frmd_e
dtbt[c]					EX_fru_e
2fe1s[c]					EX_frulys_e
butso3[p]					EX_fruur_e
butso3[c]					EX_fuc__L_e
butso3[e]					EX_fum_e
but[p]					EX_fusa_e
but[e]					EX_g1p_e
bwco[c]					EX_g3pc_e
bwco1gdp[c]					EX_g3pe_e
bwcogdp[c]					EX_g3pg_e
wco[c]					EX_g3pi_e
ca2[p]					EX_g3ps_e
ca2[e]					EX_g6p_e
lys__L[p]					EX_gal_bD_e
15dap[p]					EX_gal_e
cbi[c]					EX_gal1p_e
pppi[c]					EX_galam_e
cbi[e]					EX_galct__D_e
cbi[p]					EX_galctn__D_e
cbl1[p]					EX_galctn__L_e
cbl1[c]					EX_galt_e
cbl1[e]					EX_galur_e
cbm[c]					EX_gam_e
cdg[c]					EX_gam6p_e
preq0[c]					EX_gbbtn_e
cd2[c]					EX_gdp_e
cd2[p]					EX_glc__D_e
cd2[e]					EX_glcn_e
cdpdddecg[c]					EX_glcr_e
cmp[c]					EX_glcur_e
cdpdtdecg[c]					EX_glcur1p_e
cdpdtdec7eg[c]					EX_gln__L_e
cdpdhdecg[c]					EX_glu__L_e
cdpdhdec9eg[c]					EX_gly_e
cdpdodecg[c]					EX_glyald_e
cdpdodec11eg[c]					EX_glyb_e
preq1[c]					EX_glyc__R_e
cph4[c]					EX_glyc_e
cdigmp[c]					EX_glyc2p_e
5pg35pg[c]					EX_glyc3p_e
4c2me[c]					EX_glyclt_e
2p4c2me[c]					EX_gmp_e
cdp[c]					EX_gsn_e
cellb[e]					EX_gthox_e
cpe160[c]					EX_gthrd_e
cpg160[c]					EX_gtp_e
cpe180[c]					EX_gua_e
cpg180[c]					EX_guln__L_e
cgly[p]					EX_h_e
cgly[e]					EX_h2_e
ch4[c]					EX_h2o_e
ch4[p]					EX_h2o2_e
ch4[e]					EX_h2s_e
chitob[p]					EX_hacolipa_e
chit6p[c]					EX_halipa_e
chol[p]					EX_hdca_e
chol[c]					EX_hdcea_e
chol[e]					EX_hg2_e
cholate[c]					EX_his__L_e
cholate[p]					EX_hom__L_e
dhcholn[c]					EX_hxa_e
pphn[c]					EX_hxan_e
3psme[c]					EX_icit_e
chtbs[p]					EX_idon__L_e
chtbs6p[c]					EX_ile__L_e
chtbs[e]					EX_imp_e
cinnm[c]					EX_indole_e
cenchddd[c]					EX_inost_e
cit[p]					EX_ins_e
succ[p]					EX_isetac_e
cit[e]					EX_k_e
cellb[p]					EX_kokdolipidA_e
lipa_cold[p]					EX_lac__D_e
lipa_cold[e]					EX_lac__L_e
clpn120[p]					EX_LalaDglu_e
pa120[p]					EX_LalaDgluMdap_e
pg120[p]					EX_LalaDgluMdapDala_e
clpn140[p]					EX_LalaLglu_e
pg140[p]					EX_lcts_e
pa140[p]					EX_leu__L_e
clpn141[p]					EX_lipoate_e
pg141[p]					EX_lys__L_e
pa141[p]					EX_lyx__L_e
pa160[p]					EX_mal__D_e
pa161[p]					EX_mal__L_e
clpn180[p]					EX_malt_e
pg180[p]					EX_malthx_e
pa180[p]					EX_maltpt_e
pa181[p]					EX_malttr_e
glyc[p]					EX_maltttr_e
cl[p]					EX_man_e
cl[e]					EX_man6p_e
5cmhmsa[c]					EX_manglyc_e
5cmhm[c]					EX_melib_e
5cohe[c]					EX_meoh_e
csn[c]					EX_mepn_e
cmp[e]					EX_met__D_e
cmp[p]					EX_met__L_e
cm[e]					EX_metglcur_e
cm[p]					EX_metsox_R__L_e
co2[e]					EX_metsox_S__L_e
cobalt2[p]					EX_mg2_e
cobalt2[e]					EX_mincyc_e
colipa[c]					EX_minohp_e
colipa[p]					EX_mmet_e
udcpdp[p]					EX_mn2_e
colipap[p]					EX_mnl_e
udcpp[p]					EX_mobd_e
colipap[e]					EX_mso3_e
cpgn[p]					EX_mththf_e
cpgn[c]					EX_n2o_e
cpgn_un[e]					EX_na1_e
cpgn[e]					EX_nac_e
cpgn_un[c]					EX_nh4_e
cpgn_un[p]					EX_ni2_e
ahdt[c]					EX_nmn_e
prpmn[c]					EX_no_e
prcp[c]					EX_no2_e
cpmp[c]					EX_no3_e
cpppg3[c]					EX_novbcn_e
pppg9[c]					EX_o2_e
crn[p]					EX_o2s_e
crn[c]					EX_o6a4colipa_e
bbtcoa[c]					EX_oaa_e
gbbtn[c]					EX_ocdca_e
crncoa[c]					EX_ocdcea_e
crnDcoa[c]					EX_octa_e
ctbtcoa[c]					EX_orn_e
ctbt[c]					EX_orot_e
crn__D[p]					EX_pac_e
crn__D[c]					EX_pacald_e
crn__D[e]					EX_peamn_e
gbbtn[p]					EX_peng_e
crn[e]					EX_pep_e
cs1[e]					EX_phe__L_e
cs1[p]					EX_pheme_e
ura[c]					EX_pi_e
csn[p]					EX_pnto__R_e
csn[e]					EX_ppa_e
ctbt[p]					EX_ppal_e
tdecoa[c]					EX_pppn_e
hdcoa[c]					EX_ppt_e
odecoa[c]					EX_pro__L_e
cu[c]					EX_progly_e
cu[p]					EX_psclys_e
cu2[p]					EX_pser__L_e
cu2[e]					EX_ptrc_e
cur[c]					EX_pydam_e
dhcur[c]					EX_pydx_e
cu[e]					EX_pydxn_e
phpyr[c]					EX_pyr_e
cxsam[c]					EX_quin_e
cyan[c]					EX_r5p_e
tsul[c]					EX_raffin_e
tcynt[c]					EX_rbt_e
so3[c]					EX_remnant1_e
cyan[p]					EX_rfamp_e
tsul[p]					EX_rib__D_e
tcynt[p]					EX_rmn_e
so3[p]					EX_rnam_e
cyan[e]					EX_salchs2_e
cynt[c]					EX_salchs2fe_e
cynt[p]					EX_salchs4_e
cynt[e]					EX_salchs4fe_e
cys__L[p]					EX_salchsx_e
cys__D[p]					EX_salcn_e
cys__D[c]					EX_sbt__D_e
h2s[c]					EX_sel_e
cys__D[e]					EX_ser__D_e
cysi__L[p]					EX_ser__L_e
cysi__L[c]					EX_skm_e
cysi__L[e]					EX_slnt_e
3sala[c]					EX_so2_e
so2[c]					EX_so3_e
mercppyr[c]					EX_so4_e
cys__L[e]					EX_spmd_e
cyst__L[c]					EX_sq_e
hcys__L[c]					EX_succ_e
trnacys[c]					EX_sucr_e
cystrna[c]					EX_sulfac_e
cytd[c]					EX_tag__D_e
uri[c]					EX_tartr__D_e
cytd[e]					EX_tartr__L_e
dcmp[c]					EX_taur_e
dcdp[c]					EX_tcb_e
lac__D[p]					EX_tcynt_e
lac__D[e]					EX_tet_e
dad_2[c]					EX_thm_e
din[c]					EX_thr__L_e
damp[c]					EX_thrp_e
dadp[c]					EX_thym_e
dad_2[p]					EX_thymd_e
dad_2[e]					EX_tma_e
ala__D[e]					EX_tmao_e
damp[e]					EX_tre_e
damp[p]					EX_trp__L_e
26dap__M[c]					EX_tsul_e
26dap_LL[c]					EX_ttdca_e
15dap[e]					EX_ttdcea_e
arab__D[p]					EX_tton_e
arab__D[e]					EX_ttrcyc_e
ditp[c]					EX_tungs_e
db4p[c]					EX_tym_e
mchtbs6p[c]					EX_tyr__L_e
dca[e]					EX_tyrp_e
dca[p]					EX_uacgam_e
dcmp[e]					EX_udcpo4_e
dcmp[p]					EX_udcpo5_e
dutp[c]					EX_udpacgal_e
dcyt[c]					EX_udpg_e
duri[c]					EX_udpgal_e
dcyt[p]					EX_udpglcur_e
dcyt[e]					EX_ump_e
ddca[p]					EX_ura_e
ddca[e]					EX_urate_e
2dh3dgal[c]					EX_urea_e
2dh3dgal6p[c]					EX_uri_e
2ddglcn[p]					EX_val__L_e
2ddglcn[e]					EX_xan_e
2ddg6p[c]					EX_xmp_e
e4p[c]					EX_xtsn_e
2dda7p[c]					EX_xyl__D_e
g3p[c]					EX_xylu__L_e
dgmp[c]					EX_zn2_e
dgdp[c]					F6PA
dgmp[e]					FA100ACPHi
dgmp[p]					FA120ACPHi
dgsn[p]					FA140ACPHi
dgsn[c]					FA141ACPHi
dgsn[e]					FA160ACPHi
23dhacoa[c]					FA161ACPHi
3hadpcoa[c]					FA80ACPHi
23dhmb[c]					FACOAE100
3mob[c]					FACOAE120
23dhmp[c]					FACOAE140
3mop[c]					FACOAE141
dha[e]					FACOAE160
dha[p]					FACOAE161
23ddhb[c]					FACOAE180
23dhb[c]					FACOAE181
23dhba[c]					FACOAE60
23dhbzs[c]					FACOAE80
fe3dhbzs3[p]					FADRx
fe3dhbzs3[c]					FADRx2
hkntd[c]					FADt
thcur[c]					FALDH2
23dhdp[c]					FALGTHLs
thdp[c]					FBA
dhf[c]					FBA3
dhpt[c]					FBP
dhgly[c]					FCI
glx[c]					FCLK
dhmpt[c]					FCLPA
thmnp[c]					FCLT
dhna[c]					FDMO
octdp[c]					FDMO2
sbzcoa[c]					FDMO3
14dhncoa[c]					FDMO4
dhnpt[c]					FDMO6
6hmhpt[c]					FE3DCITR5
dhor__S[c]					FE3DCITtonex
orot[c]					FE3DHBZR
cechddd[c]					FE3DHBZS3R
25drapp[c]					FE3DHBZStonex
6hmhptpp[c]					FE3HOXexs
hmfurn[c]					FE3HOXR1
mdhdhf[c]					FE3HOXR2
dhptdn[c]					FE3HOXR3
thptdn[c]					FE3HOXtonex
dhmptp[c]					FE3Ri
3dhq[c]					FECRMexs
3dhsk[c]					FECRMR1
dimp[e]					FECRMR2
dimp[p]					FECRMR3
din[p]					FECRMtonex
din[e]					FEENTERES
25dkglcn[c]					FEENTERexs
4crsol[c]					FEENTERR1
aacald[c]					FEENTERR2
lipidA_core_e[p]					FEENTERR3
oxam[c]					FEENTERR4
mal__L[c]					FEENTERtonex
ipdp[c]					FEOXAMexs
dmpp[c]					FEOXAMR1
grdp[c]					FEOXAMR2
h2mb4p[c]					FEOXAMR3
2omhmbl[c]					FEOXAMtonex
dmso[c]					FESD1s
dms[c]					FESD2s
dmso[p]					FESR
dms[p]					FHL
dmso[e]					FLDR2
dms[e]					FLVR
dhpmp[c]					FLVRx
23doguln[c]					FMETTRS
dopa[e]					FMNAT
doxrbcn[e]					FMNRx
doxrbcn[p]					FMNRx2
dpcoa[c]					FMNt
2dhp[c]					FOMETRi
pant__R[c]					FORCT
drib[e]					FRD2
drib[p]					FRD3
2dr5p[c]					FRUK
dsbard[p]					FRULYSDG
dsbaox[p]					FRULYSE
dsbcox[p]					FRULYSK
gthrd[p]					FTHFD
dsbcrd[p]					FTHFLi
gthox[p]					FUM
dsbdox[c]					G1PACT
trdrd[c]					G1PTT
dsbdrd[c]					G1SAT
trdox[c]					G3PAT120
dsbgox[p]					G3PAT140
dsbgrd[p]					G3PAT141
dscl[c]					G3PAT160
copre2[c]					G3PAT161
ser__D[c]					G3PAT180
2amsa[c]					G3PAT181
ser__D[p]					G3PCT
ser__D[e]					G3PD2
tartr__D[c]					G3PD5
dtmp[c]					G3PD6
dtmp[e]					G3PD7
dtmp[p]					G3PT
dump[e]					G5SADs
dump[p]					G5SD
56dura[c]					G6PDA
dump[c]					G6PDH2r
2dr1p[c]					GALAM6PISO
duri[p]					GALCTD
duri[e]					GALCTLO
dxyl5p[c]					GALCTND
2me4p[c]					GALKr
dxyl[c]					GALR1TRA1
dxylnt[e]					GALR1TRA2
dxylnt[p]					GALR1TRB1
dxylnt[c]					GALR1TRB2
dxyl[e]					GALS3
dxyl[p]					GALT1
4per[c]					GALUi
erthrs[c]					GAPD
eca4colipa[p]					GARFT
eca4colipa[e]					GART
eca4und[p]					GCALDD
unagamuf[p]					GDMANE
eca2und[p]					GDPDPK
eca3und[p]					GDPMNH
3hbcoa[c]					GDPMNP
3hhcoa[c]					GDPTPDP
3hocoa[c]					GF6PTA
3hdcoa[c]					GGGABADr
3hddcoa[c]					GGGABAH
3htdcoa[c]					GGPTRCO
3hhdcoa[c]					GGPTRCS
3hodcoa[c]					GHBDHx
6pgc[c]					GHMT2r
kdo2lipid4[c]					GK1
kdo2lipid4L[c]					GLBRAN2
lipa[c]					GLCATr
kdo2lipid4p[c]					GLCOAS
lipa_cold[c]					GLCP
egmeACP[c]					GLCR1TRA1
gmeACP[c]					GLCR1TRA2
enlipa[p]					GLCR1TRB1
enlipa[e]					GLCRAL
LptA[p]					GLCRD
enlipidA[p]					GLCS1
enlipidA_LptA[p]					GLCTR1
enlipidA[e]					GLCTR2
2pg[c]					GLCTR3
seramp[c]					GLCTRA1
feenter[c]					GLDBRAN2
23dhbzs3[c]					GLGC
epmeACP[c]					GLNS
pmeACP[c]					GLNTRS
etha[c]					GLTPD
etha[p]					GLU5K
etha[e]					GLUCYS
ethso3[p]					GLUDC
ethso3[c]					GLUDy
ethso3[e]					GLUN
etoh[e]					GLUPRT
etoh[p]					GLUR
13ppd[e]					GLUSy
23dhbzs3[e]					GLUTRR
3hcinnm[e]					GLUTRS
3hpppn[e]					GLXCL
3ntym[e]					GLYAT
4abz[e]					GLYCDx
4hoxpac[e]					GLYCK
4hphac[e]					GLYCL
abt__D[e]					GLYCLTDx
btd_RR[e]					GLYCLTDy
bz[e]					GLYCTO2
chitob[e]					GLYCTO3
colipa20Oag[e]					GLYCTO4
colipaOA[e]					GLYK
dhps[e]					GLYOX
diact[e]					GLYOX3
enter[e]					GLYTRS
f6p[e]					GMAND
fad[e]					GMHEPAT
fald[e]					GMHEPK
fe[e]					GMHEPPA
fe2[e]					GMPR
fe3dcit[e]					GMPS
fe3dhbzs[e]					GMPS2
fe3dhbzs3[e]					GND
fe3hox[e]					GNK
fe3hox_un[e]					GNP
fecrm[e]					GOFUCR
fecrm_un[e]					GP4GH
feenter[e]					GPDDA1
feoxam[e]					GPDDA2
feoxam_un[e]					GPDDA3
feroxB[e]					GPDDA4
feroxBfe[e]					GPDDA5
feroxE[e]					GRTT
feroxEfe[e]					GRXR
feroxG[e]					GSNK
feroxGfe[e]					GSPMDA
fmn[e]					GSPMDS
for[e]					GTHOr
frmd[e]					GTHPi
fru[e]					GTHS
frulys[e]					GTPCI
fruur[e]					GTPCII2
fuc__L[e]					GTPDPDP
fum[e]					GTPDPK
fusa[e]					GTPHs
g1p[e]					GUACYC
g3pc[e]					GUAD
g3pe[e]					GUAPRT
g3pg[e]					GUI1
g3pi[e]					GUI2
g3ps[e]					H2SO
g6p[e]					HACD1
gal_bD[e]					HACD1i
gal[e]					HACD2
gal1p[e]					HACD2i
galam[e]					HACD3
galct__D[e]					HACD3i
galctn__D[e]					HACD4
galctn__L[e]					HACD4i
galt[e]					HACD5
galur[e]					HACD5i
gam[e]					HACD6
gam6p[e]					HACD6i
gbbtn[e]					HACD7
gdp[e]					HACD7i
glc__D[e]					HACD8
glcn[e]					HACD8i
glcr[e]					HADPCOADH3
glcur[e]					HBZOPT
glcur1p[e]					HCO3E
gln__L[e]					HEMEOS
glu__L[e]					HEPK1
gly[e]					HEPK2
glyald[e]					HEPKA2
glyb[e]					HEPKB2
glyc__R[e]					HEPT1
glyc[e]					HEPT2
glyc2p[e]					HEPT3
glyc3p[e]					HEPT4
glyclt[e]					HETZK
gmp[e]					HEX1
gsn[e]					HEX4
gthox[e]					HEX7
gthrd[e]					HHDDI
gtp[e]					HISTD
gua[e]					HISTP
guln__L[e]					HISTRS
h2[e]					HKNDDH
h2o[e]					HKNTDH
h2o2[e]					HMBS
h2s[e]					HMPK1
hacolipa[e]					HOPNTAL
halipa[e]					HPA3MO
hdca[e]					HPACOAT
hdcea[e]					HPPK2
hg2[e]					HPPPNDO
his__L[e]					HPYRI
hom__L[e]					HPYRP
hxa[e]					HPYRRx
hxan[e]					HPYRRy
icit[e]					HSDy
idon__L[e]					HSK
ile__L[e]					HSST
imp[e]					HSTPT
indole[e]					HXAND
inost[e]					HXCT
ins[e]					HXPRT
isetac[e]					HYPOE
k[e]					I2FE2SR
kokdolipidA[e]					I2FE2SS
lac__L[e]					I2FE2SS2
LalaDglu[e]					I2FE2ST
LalaLglu[e]					I4FE4SR
lcts[e]					I4FE4ST
leu__L[e]					ICDHyr
lipoate[e]					ICHORS
lys__L[e]					ICHORT
lyx__L[e]					ICL
mal__D[e]					ICYSDS
mal__L[e]					IG3PS
malt[e]					IGPDH
malthx[e]					IGPS
maltpt[e]					ILETA
malttr[e]					ILETRS
maltttr[e]					IMPC
man[e]					IMPD
man6p[e]					INOSTO
manglyc[e]					INSH
melib[e]					INSK
meoh[e]					INSTt2
mepn[e]					IPDDI
met__D[e]					IPDPS
met__L[e]					IPMD
metglcur[e]					IPPMIa
metsox_R__L[e]					IPPMIb
metsox_S__L[e]					IPPS
mg2[e]					KARA1
mincyc[e]					KARA2
minohp[e]					KAS14
mmet[e]					KAS15
mn2[e]					KDOCT2
mnl[e]					KDOPS
mobd[e]					KDUI
mso3[e]					KG6PDC
n2o[e]					L_LACD2
na1[e]					L_LACD3
nac[e]					LACZ
nh4[e]					LADGMDH
ni2[e]					LALDO2x
nmn[e]					LALDO3
no[e]					LALGP
no2[e]					LCADi
no3[e]					LCARR
novbcn[e]					LCARS
o2[e]					LCARSyi
o2s[e]					LDGUNPD
o6a4colipa[e]					LDH_D
oaa[e]					LEUTAi
ocdca[e]					LEUTRS
ocdcea[e]					LGTHL
octa[e]					LIPAHT2ex
orn[e]					LIPAMPL
orot[e]					LIPATPT
pac[e]					LIPOCT
pacald[e]					LIPOS
peamn[e]					LKDRA
peng[e]					LPADSS
pep[e]					LPLIPAL2A120
phe__L[e]					LPLIPAL2A140
pheme[e]					LPLIPAL2A141
pi[e]					LPLIPAL2A160
pnto__R[e]					LPLIPAL2A161
ppa[e]					LPLIPAL2A180
ppal[e]					LPLIPAL2A181
pppn[e]					LPLIPAL2ATE120
ppt[e]					LPLIPAL2ATE140
pro__L[e]					LPLIPAL2ATE141
progly[e]					LPLIPAL2ATE160
psclys[e]					LPLIPAL2ATE161
pser__L[e]					LPLIPAL2ATE180
ptrc[e]					LPLIPAL2ATE181
pydam[e]					LPLIPAL2ATG120
pydx[e]					LPLIPAL2ATG140
pydxn[e]					LPLIPAL2ATG141
pyr[e]					LPLIPAL2ATG160
quin[e]					LPLIPAL2ATG161
r5p[e]					LPLIPAL2ATG180
raffin[e]					LPLIPAL2ATG181
rbt[e]					LPLIPAL2E120
remnant1[e]					LPLIPAL2E140
rfamp[e]					LPLIPAL2E141
rib__D[e]					LPLIPAL2E160
rmn[e]					LPLIPAL2E161
rnam[e]					LPLIPAL2E180
salchs2[e]					LPLIPAL2E181
salchs2fe[e]					LPLIPAL2G120
salchs4[e]					LPLIPAL2G140
salchs4fe[e]					LPLIPAL2G141
salchsx[e]					LPLIPAL2G160
salcn[e]					LPLIPAL2G161
sbt__D[e]					LPLIPAL2G180
sel[e]					LPLIPAL2G181
ser__L[e]					LSERDHr
skm[e]					LYSAM
slnt[e]					LYSDC
so2[e]					LYSTRS
so3[e]					LYXI
so4[e]					M1PD
spmd[e]					MACPD
sq[e]					MALCOAMT
succ[e]					MALDDH
sucr[e]					MALS
sulfac[e]					MALTATr
tag__D[e]					MAN1PT2
tartr__D[e]					MAN6PI
tartr__L[e]					MANAO
taur[e]					MANPGH
tcb[e]					MC6PH
tcynt[e]					MCITD
tet[e]					MCITL2
thm[e]					MCITS
thr__L[e]					MCOATA
thrp[e]					MCPST
thym[e]					MDH
thymd[e]					MDH2
tma[e]					MDH3
tmao[e]					ME1
tre[e]					ME2
trp__L[e]					MECDPDH2
tsul[e]					MECDPDH5
ttdca[e]					MECDPS
ttdcea[e]					MEPCT
tton[e]					METAT
ttrcyc[e]					METGLCUR
tungs[e]					METNA
tym[e]					METOX1s
tyr__L[e]					METOX2s
tyrp[e]					METS
uacgam[e]					METSOXR1
udcpo4[e]					METSOXR2
udcpo5[e]					METTRS
udpacgal[e]					MGSA
udpg[e]					MICITDr
udpgal[e]					MLTG1
udpglcur[e]					MLTG2
ump[e]					MLTG3
ura[e]					MLTG4
urate[e]					MLTG5
urea[e]					MLTP1
uri[e]					MLTP2
val__L[e]					MLTP3
xan[e]					MMCD
xmp[e]					MMM
xtsn[e]					MMM2
xyl__D[e]					MNNH
xylu__L[e]					MOADSUx
zn2[e]					MOAT
f1p[c]					MOAT2
fru[c]					MOAT3C
f6p[p]					MOCDS
hxa[c]					MOCOS
ttdca[p]					MOGDS
ttdcea[p]					MOHMT
hdca[p]					MOX
hdcea[p]					MPTAT
ocdca[p]					MPTG
ocdcea[p]					MPTG2
hxa[p]					MPTS
octa[p]					MPTSS
fad[p]					MSAR
hmgth[c]					MTAN
Sfglutth[c]					MTHFC
fald[p]					MTHFD
fald[c]					MTHFR2
fdp[c]					MTHTHFSs
s17bp[c]					MTRPOX
fuc__L[c]					NACODA
fcl__L[c]					NADDP
fc1p[c]					NADH10
lald__L[c]					NADH5
ppp9[c]					NADH9
for[p]					NADHHR
isetac[c]					NADHHS
mso3[c]					NADHPO
sulfac[c]					NADHXD
fe2[p]					NADHXE
fe3[p]					NADK
fe3dcit[p]					NADN
fe3dcit[c]					NADPHHR
fe3dhbzs[c]					NADPHHS
fe3dhbzs[p]					NADPHQR2
fe3hox[p]					NADPHQR3
fe3hox[c]					NADPHQR4
fe3hox_un[c]					NADPHXD
fe3hox_un[p]					NADPHXE
fecrm[p]					NADPPPS
fecrm[c]					NADS1
fecrm_un[c]					NADTRHD
fecrm_un[p]					NDP3
feenter[p]					NDP7
enter[p]					NDPK1
feoxam[p]					NDPK2
feoxam[c]					NDPK3
feoxam_un[c]					NDPK4
feoxam_un[p]					NDPK5
3fe4s[c]					NDPK6
no[c]					NDPK7
n2o[c]					NDPK8
flxso[c]					NHFRBO
flxr[c]					NMNAT
mettrna[c]					NMNDA
fmettrna[c]					NMNN
fmn[p]					NMNR
frmd[p]					NNAM
5fthf[c]					NNATr
methf[c]					NNDMBRT
forcoa[c]					NNDPR
frulysp[c]					NODOx
psclys[c]					NODOy
frulys[c]					NPHS
frulys[p]					NTD1
fru[p]					NTD10
fruur[p]					NTD11
fruur[c]					NTD12
f[p]					NTD2
f[e]					NTD3
f[c]					NTD4
fuc__L[p]					NTD5
fum[p]					NTD6
fusa[p]					NTD7
gam1p[c]					NTD8
acgam1p[c]					NTD9
g1p[c]					NTP1
g1p[p]					NTP10
glc__D[p]					NTP11
dtdpglu[c]					NTP12
glu1sa[c]					NTP3
5aop[c]					NTP5
glyc2p[c]					NTP7
glyc2p[p]					NTPTP1
g3pc[p]					NTPTP2
g3pc[c]					NTRIR2x
cdpglyc[c]					O16AT
g3pe[p]					O16GLCT2
g3pe[c]					OAADC
g3pg[p]					OBTFL
g3pg[c]					OCBT
g3pi[p]					OCTDPS
g3pi[c]					OCTNLL
g3ps[p]					OGMEACPD
g3ps[c]					OGMEACPR
glu5sa[c]					OGMEACPS
1pyr5c[c]					OHEDH
glu5p[c]					OHPBAT
6pgl[c]					OHPHM
g6p[p]					OMBZLM
gal1p[p]					OMCDC
gal[p]					OMMBLHX
gal[c]					OMMBLHX3
galam[p]					OMMBLHXy
gal_bD[p]					OMPDC
galct__D[c]					OMPHHX
5dh4dglc[c]					OMPHHX3
galctn__L[c]					OMPHHXy
tagur[c]					OP4ENH
galctn__D[c]					OPETDC
galctn__L[p]					OPHBDC
galctn__D[p]					OPHHX
galct__D[p]					OPHHX3
gal1p[c]					OPHHXy
udpgal[c]					OPMEACPD
gggicolipaAR1[c]					OPMEACPR
gagggicolipaAR1[c]					OPMEACPS
gggicolipaBR1[c]					OPTCCL
gagggicolipaBR1[c]					ORNDC
colipaB[c]					ORPT
melib[c]					OXAMTC
gicolipa[c]					OXCDC
udpg[c]					OXCOAHDH
gagicolipa[c]					OXDHCOAT
galt[p]					OXPTNDH
galt1p[c]					P5CD
galur[p]					P5CR
galur[c]					PACCOAE
gam6p[p]					PACCOAL
gam[p]					PACOAT
13dpg[c]					PACt1
gar[c]					PAI2I
fgam[c]					PAI2T
glyclt[c]					PANTS
gdpddman[c]					PAPA120
gdpofuc[c]					PAPA140
ppgpp[c]					PAPA141
gdpmann[c]					PAPA160
man[c]					PAPA161
man1p[c]					PAPA180
gdp[p]					PAPA181
gdptp[c]					PAPPT3
ggbutal[c]					PAPSR
gg4abut[c]					PAPSR2
ggptrc[c]					PCNO
ghb[c]					PDE1
bglycogen[c]					PDE4
acglc__D[c]					PDH
glcn[p]					PDX5PO2
glutar[c]					PDX5POi
glutcoa[c]					PDX5PS
gicolipaAR1[c]					PENGt1
ggicolipaAR1[c]					PERD
gicolipaBR1[c]					PFK
ggicolipaBR1[c]					PFL
2h3oppan[c]					PFOR
glcr[c]					PGAMT
glcr[p]					PGCD
adpglc[c]					PGI
icolipa[c]					PGK
ggagicolipa[c]					PGL
gggagicolipa[c]					PGLYCP
icolipaAR1[c]					PGM
glcur1p[p]					PGMT
glcur[p]					PGPP120
glcur[c]					PGPP140
gln__L[p]					PGPP141
trnagln[c]					PGPP160
glntrna[c]					PGPP161
glu__L[p]					PGPP180
glucys[c]					PGPP181
pram[c]					PGSA120
glu__D[c]					PGSA140
glutrna[c]					PGSA141
trnaglu[c]					PGSA160
glyald[p]					PGSA161
glyb[p]					PGSA180
glyc3p[p]					PGSA181
glyc__R[p]					PHACOAOR
glyc__R[c]					PHACTE
3pg[c]					PHDA
glyclt[p]					PHEMEtiex
lgt__S[c]					PHETA1
gly[p]					PHETRS
trnagly[c]					PMANM
glytrna[c]					PMDPHT
gmhep1p[c]					PMEACPE
gmhep7p[c]					PMPK
gmhep17bp[c]					PNSPA
xmp[c]					PNTK
gmp[p]					POAACR
gdpfuc[c]					POR5
gp4g[c]					POX
ser__L[p]					PPA
inost[c]					PPA2
inost[p]					PPAKr
frdp[c]					PPBNGS
grxox[c]					PPC
grxrd[c]					PPCDC
gsn[c]					PPCK
gtspmd[c]					PPCSCT
xtp[c]					PPDOy
gtp[p]					PPGPPDP
35cgmp[c]					PPK
gua[c]					PPM
xan[c]					PPNCL2
gua[p]					PPND
guln__L[p]					PPNDH
h2s[p]					PPOR
h2[p]					PPPGO
3ophb[c]					PPPGO3
3hcinnm[p]					PPPNDO
hhlipa[c]					PPRDNDH
phhlipa[c]					PPS
hphhlipa[c]					PRAGSr
phphhlipa[c]					PRAIi
hphhlipaB[c]					PRAIS
icolipaBR1[c]					PRAMPC
hlipa[c]					PRASCSi
4mhetz[c]					PRCPD
4mpetz[c]					PRFGS
man6p[c]					PRMICI
hg2[c]					PROD2
hg2[p]					PROD3
2ohed[c]					PROTRS
his__L[p]					PRPPS
histd[c]					PSCVT
hisp[c]					PSD120
trnahis[c]					PSD140
histrna[c]					PSD141
hkndd[c]					PSD160
op4en[c]					PSD161
ppbng[c]					PSD180
hmbil[c]					PSD181
4ahmmp[c]					PSERT
hom__L[c]					PSP_L
hom__L[p]					PSSA120
4h2opntn[c]					PSSA140
34dphacoa[c]					PSSA141
3hpppn[p]					PSSA160
hpyr[c]					PSSA161
3php[c]					PSSA180
phom[c]					PSSA181
suchms[c]					PSURIK
imacp[c]					PTAr
pydam[c]					PTPATi
hxan[p]					PTRCTA
iscssh[c]					PUACGAMS
iscu[c]					PUACGAMtr
iscu_2fe2s[c]					PUNP1
iscs[c]					PUNP2
iscu_2fe2s2[c]					PUNP3
iscu_4fe4s[c]					PUNP4
ichor[c]					PUNP5
icit[p]					PUNP6
idon__L[p]					PUNP7
prlp[c]					PYAM5PO
eig3p[c]					PYDAMK
2cpr5p[c]					PYDXK
3ig3p[c]					PYDXNK
ile__L[p]					PYK
trnaile[c]					PYNP2r
iletrna[c]					PYROX
imp[p]					QMO2
indole[c]					QMO3
indole[p]					QUINDH
ins[p]					QUINDHyi
3c2hmp[c]					QULNS
3c4mop[c]					R09083
2ippm[c]					R15BPK
3c3hmp[c]					R1PK
isetac[p]					RBFK
kdo2lipid4[p]					RBFSa
k[p]					RBFSb
kdo[c]					RBK
ckdo[c]					RBK_L1
kdo8p[c]					RBP4E
dt5hsu[c]					REPHACCOAI
dkdglcn[c]					RHAT1
xu5p__L[c]					RHCCE
lac__L[c]					RHMND
lac__L[p]					RMI
uLa4n[p]					RMK
lcts[c]					RMPA
lcts[p]					RNDR1
LalaDglu[p]					RNDR1b
LalaLglu[p]					RNDR2
lald__D[c]					RNDR2b
leu__L[p]					RNDR3
4mop[c]					RNDR3b
trnaleu[c]					RNDR4
leutrna[c]					RNDR4b
lipa[p]					RNMK
lipa[e]					RNTR1c2
lipoamp[c]					RNTR2c2
lipoate[c]					RNTR3c2
octapb[c]					RNTR4c2
lipoate[p]					RPE
lkdr[c]					RPI
u23ga[c]					RPNTPH
lipidX[c]					S2FE2SR
lipidAds[c]					S2FE2SS
1ddecg3p[p]					S2FE2SS2
1tdecg3p[p]					S2FE2ST
1tdec7eg3p[p]					S4FE4SR
1hdecg3p[p]					S4FE4ST
1hdec9eg3p[p]					S7PI
1odecg3p[p]					SADH
1odec11eg3p[p]					SADT2
1agpe120[p]					SALCHS2FEexs
1agpe140[p]					SALCHS4FEexs
1agpe141[p]					SALCHS4FEtonex
1agpe160[p]					SARCOX
1agpe161[p]					SBTPD
1agpe180[p]					SCYSDS
1agpe181[p]					SCYSSL
1agpg120[p]					SDPDS
1agpg140[p]					SDPTA
1agpg141[p]					SELCYSS
1agpg160[p]					SELGTHR
1agpg161[p]					SELGTHR2
1agpg180[p]					SELGTHR3
1agpg181[p]					SELNPS
apg120[c]					SELR
apg140[c]					SEPHCHCS
apg141[c]					SERASr
apg160[c]					SERAT
apg161[c]					SERD_D
apg180[c]					SERD_L
apg181[c]					SERTRS
36dahx[c]					SERTRS2
trnalys[c]					SFGTHi
lystrna[c]					SGDS
lyx__L[c]					SGSAD
xylu__L[c]					SHCHCS3
lyx__L[p]					SHCHD2
mnl1p[c]					SHCHF
malcoame[c]					SHGO
mal__D[c]					SHK3Dr
mal__D[p]					SHKK
mal__L[p]					SHSL1
malt[p]					SLCYSS
acmalt[c]					SOTA
maltpt[p]					SPMDAT1
malt6p[c]					SPMDAT2
malttr[p]					SPMS
maltttr[p]					SPODM
man6p[p]					SSALx
mana[c]					SSALy
manglyc[p]					SUCBZL
man6pglyc[c]					SUCBZS
man[p]					SUCDi
gam[c]					SUCOAS
2mcit[c]					SULR
2mcacn[c]					T2DECAI
micit[c]					TAG1PK
murein5p5p[p]					TAGURr
murein5px3p[p]					TALA
murein5p5p5p[p]					TARTD
murein5px4px4p[p]					TAUDO
murein5p4p[p]					TCBt2ex
murein5p3p[p]					TDP
murein4p3p[p]					TDPADGAT
murein4px4p4p[p]					TDPAGTA
2mecdp[c]					TDPDRR
melib[p]					TDPGDH
meoh[p]					TDSK
meoh[c]					TDSR1
mepn[p]					TDSR2
met__L[p]					TGBPA
met__D[p]					ThDPAT
met__D[c]					THDPS
metglcur[c]					THFAT
metglcur[p]					THIORDXi
acmet[c]					THRA
metsox_S__L[c]					THRD
metsox_R__L[c]					THRD_L
metsox_S__L[p]					THRS
metsox_R__L[p]					THRTRS
trnamet[c]					THZPSN
mg2[p]					THZPSN3
mi1p__D[c]					TKT1
mincyc[p]					TKT2
minohp[p]					TMAOR1
murein3px3p[p]					TMDK1
mmcoa__S[c]					TMDS
mmet[p]					TMK
mmet[c]					TMPK
mmcoa__R[c]					TPI
mn2[p]					TPRDCOAS
mnl[p]					TRDR
moadamp[c]					TRE6PH
moadcosh[c]					TRE6PS
lipidA[c]					TREH
kdolipid4[c]					TRPAS2
kphphhlipa[c]					TRPS1
mobd[p]					TRPS2
mpt[c]					TRPS3
uaagmda[c]					TRPTA
moadcoo[c]					TRPTRS
mso3[p]					TRSARr
Nmtrp[c]					TYRL
n2o[p]					TYRTA
nac[p]					TYRTRS
nac[c]					U23GAAT
nmn[c]					UAAGDS
nadhx__R[c]					UACMAMO
nadhx__S[c]					UAG2E
ncam[c]					UAG4Ei
nadphx__R[c]					UAGAAT
nadphx__S[c]					UAGCVT
dnad[c]					UAGDP
nicrnt[c]					UAGPT3
dudp[c]					UAMAGS
ni2[p]					UAMAS
nmn[p]					UAPGR
dmbzid[c]					UDCPDP
quln[c]					UDCPDPS
no2[p]					UDPG4E
no2[c]					UDPGD
no3[p]					UDPGDC
no3[c]					UDPKAAT
no[p]					UGLT
novbcn[p]					UGLYCH
xtsn[c]					UGMDDS
xmp[p]					UHGADA
xtsn[p]					ULA4NFT
dimp[c]					UM3PL
ump[p]					UM4PCP
thymd[c]					UM4PL
thymd[p]					UMPK
didp[c]					UNK3
xdp[c]					UPLA4FNF
o16a4colipa[p]					UPLA4FNT
o16a4colipa[e]					UPLA4NT
ragund[c]					UPP3MT
aragund[c]					UPP3S
gfgaragund[c]					UPPDC1
o16aund[c]					UPPRT
o2s[p]					URACPAH
oaa[p]					URDGLYCD
hgmeACP[c]					URFGTT
ogmeACP[c]					URIC
ohpb[c]					URIDK2r
2omph[c]					URIH
2ombzl[c]					URIK1
2ommbl[c]					URIK2
orot5p[c]					UROCANH
2oph[c]					USHD
hpmeACP[c]					VALTA
opmeACP[c]					VALTRS
orot[p]					WCOS
oxur[c]					X5PL3E
2oxpaccoa[c]					XAND
3oxdhscoa[c]					XPPT
oxptn[c]					XTSNH
pacald[p]					XYHDL
rephaccoa[c]					XYLI1
pac[p]					XYLI2
dhptdd[c]					XYLK
pnto__R[c]					XYLK2
ugmda[c]					YUMPS
uagmda[c]
prpncoa[c]
pdx5p[c]
pydxn[c]
pe120[p]
pe140[p]
pe141[p]
pe180[p]
peamn[p]
peng[p]
fldox[c]
fldrd[c]
2pglyc[c]
pgp120[c]
pgp120[p]
pgp140[c]
pgp140[p]
pgp141[c]
pgp141[p]
pgp160[c]
pgp160[p]
pgp161[c]
pgp161[p]
pgp180[c]
pgp180[p]
pgp181[c]
pgp181[p]
2dhphaccoa[c]
5phdt[c]
5phua[c]
pheme[p]
phe__L[p]
trnaphe[c]
phetrna[c]
4r5au[c]
gmplys[c]
nalme[c]
4ppan[c]
pnto__R[p]
poaac[c]
ppap[c]
ppal[p]
ppa[p]
4ppcys[c]
pan4p[c]
r1p[c]
34hpp[c]
pppn[c]
pppn[p]
pprdn[c]
5aptn[c]
ppt[p]
fpram[c]
prbamp[c]
prfp[c]
r15bp[c]
pro__L[p]
progly[p]
trnapro[c]
protrna[c]
psclys[p]
skm5p[c]
ps120[c]
ps140[c]
ps141[c]
ps160[c]
ps161[c]
ps180[c]
ps181[c]
pser__L[c]
pser__L[p]
psuri[c]
psd5p[c]
psuri[e]
psuri[p]
thrp[p]
thr__L[p]
ptrc[p]
puacgam[c]
puacgam[p]
pydam[p]
pydx[c]
pydxn[p]
pydx[p]
uracp[c]
pyr[p]
o2s[c]
quin[p]
quin[c]
r5p[p]
rib__D[p]
raffin[p]
dmlz[c]
ru5p__L[c]
xu5p__D[c]
rfamp[p]
dtdprmn[c]
rhmn[c]
rmn[c]
rml[c]
rml1p[c]
rmn[p]
rnam[p]
rnam[c]
sufsesh[c]
sufbcd[c]
sufbcd_2fe2s[c]
sufse[c]
sufbcd_2fe2s2[c]
sufbcd_4fe4s[c]
s7p[c]
sucorn[c]
salchs2fe[p]
salchs2fe[c]
salchs4fe[p]
salchs4fe[c]
salchsx[p]
salcn[p]
sarcs[c]
sbt6p[c]
sbt__D[p]
scys__L[c]
sl26da[c]
sl2a6o[c]
selnp[c]
sertrna_sec[c]
sectrna[c]
slnt[c]
dgslnt[c]
gslnt[c]
seln[c]
sel[c]
sel[p]
2sephchc[c]
trnaser[c]
sertrna[c]
trnasecys[c]
sucglu[c]
sucgsa[c]
2shchc[c]
scl[c]
skm[c]
skm[p]
slnt[p]
so2[p]
so4[p]
spmd[p]
N1aspmd[c]
n8aspmd[c]
sucbz[c]
sucr[p]
suc6p[c]
tartr__D[p]
sulfac[p]
tag1p__D[c]
tagdp__D[c]
tag__D[p]
tartr__L[c]
tartr__L[p]
taur[c]
taur[p]
tcb[p]
thmmp[c]
dtdp4addg[c]
dtdp4d6dg[c]
dtdp4d6dm[c]
tet[p]
athtp[c]
thm[p]
thm[c]
trnathr[c]
thrtrna[c]
thym[c]
thym[p]
4hba[c]
tmao[c]
tma[c]
tmao[p]
[truncated: 58 more rows]

## Sheet: OF
Name	Class	Feature
PG(16:0/0:0)	Glycerophospholipids	484.283@1.89	1.6215	-1.31677	-2.34532	-1.76765
PG(16:0/0:0)	Glycerophospholipids	522.2387@1.89	1.62683	-1.24344	-2.31169	-1.7227
PG(20:5(5Z,8Z,11Z,14Z,17Z)/0:0)	Glycerophospholipids	530.2669@1.94	-1.26211	-1.51623	-2.6123	-1.67901
PG(15:0/12:0)	Glycerophospholipids	652.434@6.58	-1.2304	-1.48624	-2.29138	-1.69032
PG(15:0/14:0)	Glycerophospholipids	662.4467@16.03	1.12563	-1.1186	-1.86348	-1.2673
PG(14:1(9Z)/17:0)	Glycerophospholipids	706.4841@16.02	1.03363	-1.21868	-2.15111	-1.45527
PE(P-16:0/17:2(9Z,12Z))	Glycerophospholipids	707.482@1.44	1.27868	3.5968	6.4568	35.0378
PG(18:1(9Z)/14:0)	Glycerophospholipids	720.4997@16.02	-1.07831	-1.31107	-2.17758	-1.42453
PG	Glycerophospholipids	828.6616@24.98	1.35615	-1.0541	1.02006	1.0148

## Sheet: PE
PE(P-16:0/17:2(9Z,12Z))	27.8683	259.68	545.68	3403.78

## Sheet: byCATEGORY
Category	Feature	prom G1-G5			Category		Percent	Percent W/UK
Fatty Acyls	100.0525@0.97	213.379			Fatty Acyls	1.03456e+06	0.0614304	0.0485795
Fatty Acyls	100.0526@4	11298.4			Prenol Lipids	882194	0.0523832	0.0414249
	104.0736@1.03	11625.4			Sphingolipids	44076.3	0.00261717	0.00206967
	105.058@0.98	216.336			Saccharolipids	13034.9	0.000773992	0.000612077
Fatty Acyls	110.0369@0.96	5698.37			Glycerolipids	1.10603e+07	0.65674	0.519353
Fatty Acyls	110.1096@1.62	4663.54			Sterol Lipids	84033.5	0.00498976	0.00394593
Fatty Acyls	120.0435@1.05	11206.8			Glycerophospholipids	2.43492e+06	0.144581	0.114336
Fatty Acyls	128.0458@4	58521.6			Polyketides	1.28808e+06	0.0764842	0.0604841
Fatty Acyls	128.0473@4	58780.2			total	1.68412e+07
	129.0692@1.09	4522.67
Fatty Acyls	129.1518@0.9	7295.36			Other/Unknown	4.45507e+06		0.209195
	132.0699@1.06	16100
Prenol Lipids	132.0939@1.89	9332.58			total w UK	2.12962e+07
Fatty Acyls	146.058@4	3617.75
	148.016@1.39	8996.98
Fatty Acyls	149.0317@1.06	24971
	157.1581@1.08	2883.68
	165.0692@1.1	12598.3
Fatty Acyls	172.0734@0.96	19806.4
	172.1006@1.06	212.397
Fatty Acyls	188.1048@1.89	7936.71
Fatty Acyls	199.1939@1.41	11528
	200.1072@1.1	9726.21
	200.1079@1.07	526.464
Fatty Acyls	201.173@0.88	2677.49
	206.0251@1.23	4111.46
	206.0251@1.47	4985.14
	206.0251@20.28	1359.48
	206.0255@17.12	1664.83
Fatty Acyls	213.2093@1.66	4369.57
	220.0773@17.13	4376.3
	220.0773@13.82	3965.93
	220.0773@22.4	2108.58
	220.0774@21.58	3649.72
	222.0563@1.9	5749.39
	222.0566@1.23	4121.91
	222.0566@1.47	5685.78
	222.0566@2.65	2576.56
Fatty Acyls	224.1363@1.1	36058.6
Fatty Acyls	224.1427@1.1	19807.3
Sphingolipids	227.2251@1.68	6885.83
Fatty Acyls	241.2408@2	5001.65
Fatty Acyls	254.1672@1.58	1639.02
Fatty Acyls	255.2564@2.28	17547.7
Fatty Acyls	256.2406@2.45	20676.5
Fatty Acyls	257.2358@1.71	2713.17
Fatty Acyls	257.2359@1.54	8277.65
Fatty Acyls	258.1835@4	8618.97
Fatty Acyls	264.2457@2.53	183558
Fatty Acyls	266.2611@3.35	45896.8
Fatty Acyls	269.2722@2.45	6737.04
	272.1593@0.97	386.457
Sphingolipids	273.2672@1.23	2529.46
	280.0439@1.9	5138.68
	280.0439@10.36	4725.05
	280.0441@1.47	5223.93
	280.0441@20.28	6428.51
	280.0441@22.4	1808.66
	280.0443@17.12	3381.15
	280.0443@13.82	4988.16
	280.1024@1.03	329.346
Fatty Acyls	280.1436@1.06	6451.71
Fatty Acyls	282.2563@2.45	18192.6
	282.2876@1.11	1928.83
Fatty Acyls	283.2874@2.94	2413.4
Fatty Acyls	283.2875@3.23	2204.16
Fatty Acyls	289.262@1.31	9886.07
Saccharolipids	294.096@22.4	1215.11
Saccharolipids	294.0965@17.13	1474.41
Fatty Acyls	297.3035@3.36	12555.8
Fatty Acyls	297.3036@3.96	6821.78
Fatty Acyls	303.2542@2.53	3287.85
Fatty Acyls	303.3047@1.05	2674.37
Fatty Acyls	310.2877@3.35	29427.9
Fatty Acyls	311.3189@4.08	4838.92
Fatty Acyls	315.2048@0.97	3968.05
Fatty Acyls	320.3082@4.86	13036.9
Fatty Acyls	320.3085@4.64	91210.5
Fatty Acyls	325.3349@4.84	9509.85
Glycerolipids	330.2775@2.45	29991.8
Fatty Acyls	336.194@1.89	4445.02
Fatty Acyls	337.335@4.86	12827
Fatty Acyls	339.35@6.32	2566.25
	340.0109@20.28	2308.6
	340.0111@17.12	3954.27
Fatty Acyls	353.366@7.6	4923.09
Fatty Acyls	353.3662@6.5	5528.99
	354.0628@20.28	5345.96
	354.0629@13.82	16666
	354.0629@2.65	3402.38
	354.063@22.4	5155.83
	354.063@17.12	9329.35
	354.0631@21.58	11100.5
	354.0631@24.34	1308.97
Fatty Acyls	356.274@2.45	4179.48
Glycerolipids	358.3087@3.35	89035.2
	362.3033@1.92	390.487
Fatty Acyls	367.3816@7.79	2475.32
Fatty Acyls	367.3817@8.61	9470.22
	370.0942@2.65	8079.64
	370.0943@3.9	3631.77
Fatty Acyls	370.3089@4	54318.5
	381.3974@9.14	5788.34
Fatty Acyls	386.1791@1.03	17034.6
	393.3401@7.98	88905.8
Fatty Acyls	408.2646@4	6640.02
	412.1758@1.03	4384.28
	414.0295@10.36	2515.42
	414.0296@20.28	1988.87
	414.0297@13.82	2620.28
Fatty Acyls	414.2037@1.06	74930.7
Fatty Acyls	426.2985@1.54	4789.98
	428.0817@20.28	8227.08
	428.0819@21.58	4203.71
	428.0819@22.4	6548.74
	428.082@17.13	17735.1
	428.082@24.34	1278.75
	428.0821@23.28	3213.18
Sterol Lipids	430.3121@23.36	43184.6
	440.2079@1.06	13769.4
Sterol Lipids	444.3266@2.45	32655.9
Fatty Acyls	452.1669@1.06	3392.09
	452.2119@2.84	7597.68
	470.3246@1.53	6989.27
Prenol Lipids	472.3579@3.35	75009.5
Sterol Lipids	482.2823@2.45	2597.01
Glycerophospholipids	484.283@1.89	43518
Sterol Lipids	484.3531@0.98	5205.44
	488.0483@17.12	2226.78
	488.0486@13.81	2924.23
	502.1003@22.4	1873.87
	502.1004@20.28	13765.8
	502.1004@10.36	5875.39
	502.1006@23.28	3060.97
	502.1007@21.58	4994.1
	502.1016@24.34	3175.11
	505.3601@2.45	3387.76
Polyketides	510.2795@1.89	9056.86
	514.351@1.51	10569.5
Polyketides	518.1319@10.36	37754.9
Polyketides	521.1303@10.36	3844.21
Glycerophospholipids	522.2387@1.89	1635.62
	523.5693@17.11	4768.72
Glycerophospholipids	530.2669@1.94	5561.67
	530.3474@2.45	955.315
	535.5695@20.52	1672.88
	536.5284@12.47	5557.28
	551.6009@19.81	25245.2
	553.1688@2.65	2858.74
	558.377@1.49	11318.7
Polyketides	562.067@17.12	1585.26
Polyketides	562.0671@20.28	1131.86
	562.5439@2.53	22786.1
	564.5594@15.19	7994.84
	576.1193@21.58	6448.02
	576.1193@13.81	9126.18
	576.1194@22.4	1962.18
	576.1196@24.33	1026
Fatty Acyls	576.5121@28.41	11136.4
Glycerolipids	578.5279@18.98	37721.9
	579.1177@13.82	1355.62
	579.6324@21.3	18719.4
	592.1505@13.82	1868.91
Glycerolipids	596.5383@18.97	21937.3
Prenol Lipids	598.3841@1.05	3932.32
	600.3109@2.08	503.652
Saccharolipids	602.4033@1.47	10345.4
Glycerolipids	604.5434@29.96	6845.17
Prenol Lipids	606.3839@16.02	16098.2
Glycerophospholipids	606.4628@16.24	3463.29
Glycerolipids	606.5594@20.89	177500
	607.6636@22.13	49158.6
Polyketides	609.1772@13.82	212886
Polyketides	614.1737@13.82	1922.93
Sterol Lipids	617.3928@1.89	390.579
	627.1875@3.9	6867.84
Glycerophospholipids	634.4941@18.98	6997.85
	635.6944@22.95	7465.63
Glycerolipids	641.5964@20.89	18550.2
	646.4292@1.46	8160.74
Glycerophospholipids	646.452@21.33	234890
Glycerolipids	648.5094@22.34	16126.3
	650.1378@22.4	3185.6
	650.1379@17.12	7809.84
Glycerophospholipids	652.434@6.58	3647.42
	653.1361@17.12	1466.23
Glycerolipids	655.575@20.89	74808.4
Glycerophospholipids	662.4467@16.03	701409
	663.7258@23.87	9285.86
	666.1693@17.12	1613.06
Glycerolipids	668.5407@2.45	8835.42
	674.6692@4.64	7799.03
Glycerophospholipids	680.4132@21.33	16130
Glycerolipids	682.5939@23.36	1.77139e+06
	683.196@17.12	389104
Glycerolipids	683.6066@21.76	90617.7
	689.1913@17.12	1479.5
	697.2482@21.11	56637.4
Glycerolipids	698.5885@21.51	131072
Glycerophospholipids	700.4025@16.02	31565.6
	701.2066@5.77	6957.63
Polyketides	704.125@17.12	940.952
Glycerophospholipids	704.5358@21.77	57597.5
Glycerophospholipids	706.4841@16.02	18718.5
Glycerophospholipids	707.482@1.44	5629.06
Glycerolipids	707.6066@21.53	23187
Glycerolipids	709.6217@22.04	56211.4
Glycerolipids	711.6378@22.54	59290.4
Glycerophospholipids	716.5194@2.45	2314.24
Glycerophospholipids	720.4997@16.02	22853.4
Glycerophospholipids	720.5501@23.36	424869
Polyketides	724.1565@20.28	5418.99
Glycerolipids	724.6035@3.35	31650
Glycerophospholipids	730.5509@22.03	28438.1
Glycerophospholipids	732.5662@22.51	37489.6
Glycerophospholipids	735.5356@16.02	4492.91
Glycerophospholipids	736.5443@21.52	35685.6
Glycerophospholipids	736.5445@23.36	59927.4
Glycerolipids	737.6532@22.75	42821.3
Glycerolipids	739.6692@23.35	106955
Polyketides	740.1883@20.28	470615
Glycerophospholipids	749.515@16.02	7441.34
Glycerophospholipids	751.5077@1.41	3413.86
Glycerolipids	756.5674@22.27	7818.79
Polyketides	757.2151@20.28	445590
Prenol Lipids	758.2157@20.28	254984
Glycerophospholipids	758.5821@22.75	21243.3
Glycerophospholipids	760.5982@23.21	31687.5
Polyketides	763.2101@20.28	2718.11
Glycerophospholipids	763.531@16.02	2168.38
Sphingolipids	767.6267@3.35	8769.54
Glycerolipids	767.7006@24.07	85172
	771.2668@22.09	34087.3
Glycerophospholipids	772.5985@23.08	10875.4
Glycerophospholipids	774.6139@23.59	15239.5
	775.225@8.29	6107.97
Polyketides	778.1436@20.28	2220.69
Sphingolipids	779.5611@16.02	3639.31
Glycerolipids	779.7006@23.97	61152.8
Glycerolipids	781.7161@24.53	64491.8
Polyketides	784.2256@20.28	4044.5
Glycerophospholipids	784.5985@23.03	14617.2
Glycerophospholipids	786.614@23.52	37294.4
Glycerophospholipids	788.6297@24.08	50265.7
Glycerophospholipids	789.5469@16.02	3379.67
Glycerophospholipids	790.4915@16.02	16283.3
Glycerolipids	791.7006@23.91	70892.3
Glycerolipids	793.7169@24.46	144742
Glycerolipids	795.732@25.1	136188
	798.241@20.28	1587.99
Glycerolipids	798.6719@24.47	42224.2
Glycerolipids	799.6166@2.45	1625.89
Glycerophospholipids	800.6297@23.96	38079.2
Glycerolipids	800.687@25.1	36683.4
Glycerophospholipids	802.6453@24.53	40302.3
Glycerolipids	805.7163@24.39	60589.2
Glycerolipids	807.7322@24.98	113958
Glycerolipids	809.7475@25.64	89746.8
Glycerophospholipids	812.6297@23.91	43861
	814.2068@21.58	492257
Glycerophospholipids	814.6462@24.46	92600.7
Glycerolipids	814.7022@25.69	24843.7
Glycerophospholipids	816.6608@25.1	84209.4
Glycerolipids	817.716@24.29	38933
Glycerolipids	819.7325@24.91	147324
Glycerolipids	821.7478@25.51	229822
Glycerolipids	823.7635@26.35	184687
Glycerophospholipids	824.6299@23.82	8353.87
Glycerolipids	824.6878@24.91	43210.2
Glycerolipids	826.6457@24.39	41086.9
Glycerophospholipids	828.6616@24.98	74630.5
Glycerolipids	828.7185@26.33	46473.9
Glycerolipids	830.6768@25.67	57998.8
Glycerolipids	833.7474@25.43	72771.8
Glycerophospholipids	834.4989@16.02	2559.88
Glycerolipids	835.7631@26.14	110422
Glycerolipids	837.7787@27.06	61264.9
Glycerophospholipids	838.6456@24.3	26818.3
Glycerolipids	838.7031@25.43	23652.5
Glycerolipids	840.6622@24.91	95077.3
Glycerolipids	840.7183@26.14	31146.5
Glycerophospholipids	841.7@22.87	10886.1
Glycerolipids	842.6771@25.52	154829
Glycerolipids	842.734@27.06	15350.8
Glycerolipids	844.6928@26.35	118068
	845.2853@23	29967.7
Glycerolipids	845.7474@25.34	70103.2
Glycerolipids	847.7636@25.91	218534
	849.2435@11.31	7171.23
Glycerolipids	849.7792@26.83	525620
Glycerolipids	851.7948@27.87	114976
Fatty Acyls	852.1624@21.58	4375.05
Glycerolipids	852.661@24.79	17533.9
Glycerolipids	852.7185@25.92	65152.5
Glycerolipids	854.6774@25.43	55952.6
Glycerolipids	854.7345@26.83	135651
Glycerolipids	856.6925@26.14	77274.7
prenol Lipids	858.2442@21.58	7454.35
Glycerolipids	858.708@27.06	38536.3
Glycerolipids	861.779@26.62	54548.3
Glycerophospholipids	862.6296@22.86	10530.1
Glycerolipids	863.7948@27.59	67960.8
Glycerolipids	865.8098@28.67	28557.9
Glycerolipids	866.6768@25.35	48334.9
Glycerolipids	868.6928@25.92	151940
Glycerolipids	870.7085@26.83	324969
Glycerolipids	871.7633@25.44	42310.8
Polyketides	872.2597@21.58	9502.1
Glycerolipids	872.7237@27.87	83912.2
Glycerolipids	873.7789@26.32	125827
	874.7797@26.32	49603.9
Glycerolipids	875.7948@27.34	376315
Glycerolipids	877.8105@28.41	529777
Glycerolipids	878.7344@26.32	38984.4
Glycerolipids	879.8258@29.46	69912
Glycerolipids	880.6924@25.93	16908.7
Glycerolipids	880.7501@27.34	109557
Glycerophospholipids	881.5623@1.48	2383.42
Glycerolipids	882.7081@26.61	40138.7
Glycerolipids	882.7658@28.41	140069
Glycerolipids	884.7237@27.6	55041.7
prenol Lipids	888.2257@22.4	515383
Glycerolipids	889.8101@28.15	28183.6
Glycerophospholipids	890.661@23.63	14635.9
	891.2245@22.4	2191.73
Glycerolipids	891.8257@29.2	31458.2
Glycerolipids	892.6928@25.44	32787.3
Glycerolipids	893.8411@30.23	17359.4
Glycerolipids	894.7085@26.33	95437.9
Glycerolipids	894.7648@28.15	9374.12
Glycerolipids	896.7242@27.34	275615
	897.7623@24.44	23495.2
	897.7643@24.44	23468.7
Glycerolipids	898.7396@28.41	396009
Glycerolipids	899.7944@26.79	68492.8
Glycerolipids	900.755@29.47	68672.5
Glycerolipids	901.8103@27.88	150350
Glycerolipids	903.826@28.95	142117
Glycerolipids	905.8419@29.96	264892
Glycerolipids	906.7653@27.88	46988.2
Glycerolipids	907.8514@30.92	40407.1
Glycerolipids	908.7812@28.95	47510.2
Glycerolipids	910.7972@29.96	69686.7
Glycerolipids	912.812@30.91	10197.4
Glycerolipids	917.8408@29.72	9602.11
Glycerophospholipids	918.6928@24.45	24323.4
Glycerolipids	918.7081@25.85	30308.2
Polyketides	919.3038@24	26468.9
Glycerolipids	919.8566@30.95	18143.6
Glycerolipids	920.7238@26.79	49829
Glycerolipids	922.7397@27.88	124987
	923.2622@14.55	6451.93
	923.7788@24.78	22947.9
Glycerolipids	924.7554@28.95	142320
Polyketides	926.1808@22.4	5670.67
Glycerolipids	929.8412@29.43	12851.2
Glycerolipids	931.8568@30.47	23103.7
Polyketides	932.2626@22.4	7887.05
sphingolipids	944.7086@24.78	22252.1
	946.213@23.28	2840.56
	946.2783@22.4	14263.7
	946.7238@25.32	7623.85
Polyketides	949.2777@22.4	3686.13
Glycerolipids	952.7864@30.48	22396.6
	962.2448@23.28	549953
	974.7551@26.81	6385.74
	993.3228@25.21	24667.6
	1000.1997@23.28	8516.03
Polyketides	1006.2811@23.28	9296.41
	1020.2971@23.28	17598.5
Polyketides	1023.2964@23.28	5217.92
	1036.2635@24.34	721515
	1053.29@24.34	396819
	1067.3416@26.74	20822.3
Fatty Acyls	1071.2997@20.33	5931.34
	1074.2184@24.34	10229.6
	1080.3004@24.34	14311.6
	1094.3155@24.34	26121.2
	1110.2814@25.68	7389.56
	1127.3087@25.69	734854
	1141.36@28.64	20815.2
	1148.2372@25.69	11230.1
Polyketides	1154.3187@25.69	16250.4
	1164.7404@2.18	2646.04
	1168.3349@25.68	31574
Polyketides	1184.3006@27.45	4373.42

## Sheet: Categories
Category	Feature	PROM G1-G5	PROM QC			Category		Percent	Percent W/UK
Fatty Acyls	100.0525@0.97	213.379	382.618			Fatty Acyls	1.02686e+06	0.0609731	0.0482178
Fatty Acyls	100.0526@4	11298.4	14377.5			Prenol Lipids	856763	0.0508731	0.0402307
	104.0736@1.03	11625.4	8671.63			Sphingolipids	44076.3	0.00261717	0.00206967
	105.058@0.98	216.336	360.829			Saccharolipids	13034.9	0.000773992	0.000612077
Fatty Acyls	110.0369@0.96	5698.37	15377.5			Glycerolipids	1.09952e+07	0.652879	0.5163
Fatty Acyls	110.1096@1.62	4663.54	2453.89			Sterol Lipids	84033.5	0.00498976	0.00394593
Fatty Acyls	120.0435@1.05	11206.8	22314.1			Glycerophospholipids	2.53308e+06	0.15041	0.118945
Fatty Acyls	128.0458@4	58521.6	74273.7			Polyketides	1.28808e+06	0.0764842	0.0604841
Fatty Acyls	128.0473@4	58780.2	74666.5			total	1.68412e+07
	129.0692@1.09	4522.67	8230.03
Fatty Acyls	129.1518@0.9	7295.36	8639.07			total2	2.12962e+07		1
	132.0699@1.06	16100	24970.6
Fatty Acyls	132.0939@1.89	9332.58	25995.3			unk	4.45507e+06		0.209195
Fatty Acyls	146.058@4	3617.75	4390.86
	148.016@1.39	8996.98	16758.9
Fatty Acyls	149.0317@1.06	24971	43884.9
	157.1581@1.08	2883.68	8727.42			Category		Percent	Percent W/UK
	165.0692@1.1	12598.3	21664.6			Fatty Acyls	1.70081e+06	0.0810099	0.185952
Fatty Acyls	172.0734@0.96	19806.4	65594.2			Prenol Lipids	1.80649e+06	0.0860438	0.0848269
	172.1006@1.06	212.397	330.049			Sphingolipids	66829.5	0.00318311	0.00313809
Fatty Acyls	188.1048@1.89	7936.71	21801.7			Saccharolipids	52603.9	0.00250554	0.0024701
Fatty Acyls	199.1939@1.41	11528	12605.2			Glycerolipids	1.12362e+07	0.535184	0.527615
	200.1072@1.1	9726.21	17999.2			Sterol Lipids	157793	0.00751572	0.00740943
	200.1079@1.07	526.464	920.501			Glycerophospholipids	2.58018e+06	0.122895	0.121156
Fatty Acyls	201.173@0.88	2677.49	9379.03			Polyketides	3.39412e+06	0.161663	0.159377
	206.0251@1.23	4111.46	4433.24			total	2.0995e+07
	206.0251@1.47	4985.14	4819.21
	206.0251@20.28	1359.48	4283.06			total total	3.01415e+07
	206.0255@17.12	1664.83	5409.3
Fatty Acyls	213.2093@1.66	4369.57	8029.82			other unk	9.1465e+06
	220.0773@17.13	4376.3	14397
	220.0773@13.82	3965.93	12326.7
	220.0773@22.4	2108.58	5953.85
	220.0774@21.58	3649.72	8987.5
	222.0563@1.9	5749.39	5715.95
	222.0566@1.23	4121.91	4387.14
	222.0566@1.47	5685.78	5644.75
	222.0566@2.65	2576.56	2815.54
Fatty Acyls	224.1363@1.1	36058.6	43495.8
Fatty Acyls	224.1427@1.1	19807.3	35406.1
Sphingolipids	227.2251@1.68	6885.83	12344
Fatty Acyls	241.2408@2	5001.65	9568.71
Fatty Acyls	254.1672@1.58	1639.02	3564.43
Fatty Acyls	255.2564@2.28	17547.7	16672.6
Fatty Acyls	256.2406@2.45	20676.5	57727.7
Fatty Acyls	257.2358@1.71	2713.17	4279.94
Fatty Acyls	257.2359@1.54	8277.65	12255.1
Fatty Acyls	258.1835@4	8618.97	10978.1
Fatty Acyls	264.2457@2.53	183558	207185
Fatty Acyls	266.2611@3.35	45896.8	77939.3
Fatty Acyls	269.2722@2.45	6737.04	11465.4
	272.1593@0.97	386.457	167.022
Sphingolipids	273.2672@1.23	2529.46	9514.27
	280.0439@1.9	5138.68	4779.69
	280.0439@10.36	4725.05	14828.7
	280.0441@1.47	5223.93	5032.11
	280.0441@20.28	6428.51	20397.4
	280.0441@22.4	1808.66	5262
	280.0443@17.12	3381.15	10883.3
	280.0443@13.82	4988.16	15801.9
	280.1024@1.03	329.346	309.953
Fatty Acyls	280.1436@1.06	6451.71	13733.6
Fatty Acyls	282.2563@2.45	18192.6	49872
	282.2876@1.11	1928.83	2169.82
Fatty Acyls	283.2874@2.94	2413.4	5149.95
Fatty Acyls	283.2875@3.23	2204.16	4281.22
Fatty Acyls	289.262@1.31	9886.07	25578.5
Saccharolipids	294.096@22.4	1215.11	3043.43
Saccharolipids	294.0965@17.13	1474.41	4744.8
Fatty Acyls	297.3035@3.36	12555.8	21231.9
Fatty Acyls	297.3036@3.96	6821.78	11656.9
Fatty Acyls	303.2542@2.53	3287.85	4115.85
Fatty Acyls	303.3047@1.05	2674.37	2684.36
Fatty Acyls	310.2877@3.35	29427.9	47715.2
Fatty Acyls	311.3189@4.08	4838.92	8972.6
Fatty Acyls	315.2048@0.97	3968.05	2780.81
Fatty Acyls	320.3082@4.86	13036.9	46159.2
Fatty Acyls	320.3085@4.64	91210.5	145987
Fatty Acyls	325.3349@4.84	9509.85	17951.5
Glycerolipids	330.2775@2.45	29991.8	92329.4
Fatty Acyls	336.194@1.89	4445.02	12210.1
Fatty Acyls	337.335@4.86	12827	45988.5
Fatty Acyls	339.35@6.32	2566.25	4908.99
	340.0109@20.28	2308.6	7132.87
	340.0111@17.12	3954.27	12591.7
Fatty Acyls	353.366@7.6	4923.09	8557.59
Fatty Acyls	353.3662@6.5	5528.99	9196.49
	354.0628@20.28	5345.96	17592
	354.0629@13.82	16666	53895.8
	354.0629@2.65	3402.38	3656.33
	354.063@22.4	5155.83	15096.2
	354.063@17.12	9329.35	30253.2
	354.0631@21.58	11100.5	32256.3
	354.0631@24.34	1308.97	3269.93
Fatty Acyls	356.274@2.45	4179.48	10529.3
Glycerolipids	358.3087@3.35	89035.2	159064
	362.3033@1.92	390.487	1518.93
Fatty Acyls	367.3816@7.79	2475.32	4025.61
Fatty Acyls	367.3817@8.61	9470.22	18054.8
	370.0942@2.65	8079.64	8496.1
	370.0943@3.9	3631.77	4125.76
Fatty Acyls	370.3089@4	54318.5	70142.4
	381.3974@9.14	5788.34	10554.9
Glycerophospholipids	386.1791@1.03	17034.6	15908.8
	393.3401@7.98	88905.8	113607
Fatty Acyls	408.2646@4	6640.02	8381.45
	412.1758@1.03	4384.28	4008.94
	414.0295@10.36	2515.42	7775.46
	414.0296@20.28	1988.87	6047.93
	414.0297@13.82	2620.28	8105.24
Fatty Acyls	414.2037@1.06	74930.7	147561
Fatty Acyls	426.2985@1.54	4789.98	21230.6
	428.0817@20.28	8227.08	26395.4
	428.0819@21.58	4203.71	11669.4
	428.0819@22.4	6548.74	19207.3
	428.082@17.13	17735.1	59149.8
	428.082@24.34	1278.75	3731.68
	428.0821@23.28	3213.18	9364.09
Sterol Lipids	430.3121@23.36	43184.6	40211.6
	440.2079@1.06	13769.4	27473.6
Sterol Lipids	444.3266@2.45	32655.9	92371.9
Fatty Acyls	452.1669@1.06	3392.09	6339.8
	452.2119@2.84	7597.68	8921.47
	470.3246@1.53	6989.27	30973.7
Prenol Lipids	472.3579@3.35	75009.5	121757
Sterol Lipids	482.2823@2.45	2597.01	6816.42
Glycerophospholipids	484.283@1.89	43518	125208
Sterol Lipids	484.3531@0.98	5205.44	17229.1
	488.0483@17.12	2226.78	6796.84
	488.0486@13.81	2924.23	9079.1
	502.1003@22.4	1873.87	5483.77
	502.1004@20.28	13765.8	45048
	502.1004@10.36	5875.39	18470.4
	502.1006@23.28	3060.97	8919.83
	502.1007@21.58	4994.1	14806.2
	502.1016@24.34	3175.11	8766.43
	505.3601@2.45	3387.76	9020.57
Polyketides	510.2795@1.89	9056.86	25010
	514.351@1.51	10569.5	46015.2
Polyketides	518.1319@10.36	37754.9	124927
Polyketides	521.1303@10.36	3844.21	11997.4
Glycerophospholipids	522.2387@1.89	1635.62	4575.32
	523.5693@17.11	4768.72	11080.1
Glycerophospholipids	530.2669@1.94	5561.67	1829.97
	530.3474@2.45	955.315	1845.56
	535.5695@20.52	1672.88	3605.48
	536.5284@12.47	5557.28	16123.3
	551.6009@19.81	25245.2	59799.1
	553.1688@2.65	2858.74	2980.97
	558.377@1.49	11318.7	48983
Polyketides	562.067@17.12	1585.26	4940.08
Polyketides	562.0671@20.28	1131.86	3194.45
	562.5439@2.53	22786.1	27522.2
	564.5594@15.19	7994.84	21109
	576.1193@21.58	6448.02	18813.8
	576.1193@13.81	9126.18	29400.1
	576.1194@22.4	1962.18	5527.11
	576.1196@24.33	1026	2611.28
Fatty Acyls	576.5121@28.41	11136.4	11750.7
Glycerolipids	578.5279@18.98	37721.9	137226
	579.1177@13.82	1355.62	4166.92
	579.6324@21.3	18719.4	44094.8
	592.1505@13.82	1868.91	5583.12
Glycerolipids	596.5383@18.97	21937.3	78154.3
Prenol Lipids	598.3841@1.05	3932.32	2272.18
	600.3109@2.08	503.652	493.833
Saccharolipids	602.4033@1.47	10345.4	44815.7
Glycerolipids	604.5434@29.96	6845.17	7557.88
Glycerophospholipids	606.3839@16.02	16098.2	21578.9
Glycerophospholipids	606.4628@16.24	3463.29	8600.7
Glycerolipids	606.5594@20.89	177500	219341
	607.6636@22.13	49158.6	116211
Polyketides	609.1772@13.82	212886	696953
Polyketides	614.1737@13.82	1922.93	6014.85
Sterol Lipids	617.3928@1.89	390.579	1163.88
	627.1875@3.9	6867.84	7620.05
Glycerophospholipids	634.4941@18.98	6997.85	24228.4
	635.6944@22.95	7465.63	16690
Glycerolipids	641.5964@20.89	18550.2	81615.5
	646.4292@1.46	8160.74	35917.1
Glycerophospholipids	646.452@21.33	234890	16185.1
Glycerophospholipids	648.5094@22.34	16126.3	13631.5
	650.1378@22.4	3185.6	8969.07
	650.1379@17.12	7809.84	24866.2
Glycerophospholipids	652.434@6.58	3647.42	5347.19
	653.1361@17.12	1466.23	4527.1
Glycerolipids	655.575@20.89	74808.4	57871.3
Glycerophospholipids	662.4467@16.03	701409	851125
	663.7258@23.87	9285.86	20885.9
	666.1693@17.12	1613.06	5074.04
Glycerolipids	668.5407@2.45	8835.42	68934.7
	674.6692@4.64	7799.03	11063.8
Glycerophospholipids	680.4132@21.33	16130	3301
Glycerolipids	682.5939@23.36	1.77139e+06	1.71173e+06
	683.196@17.12	389104	1.15606e+06
Glycerolipids	683.6066@21.76	90617.7	76822.8
	689.1913@17.12	1479.5	4798.6
	697.2482@21.11	56637.4	54691
Glycerolipids	698.5885@21.51	131072	118470
Glycerophospholipids	700.4025@16.02	31565.6	41304.8
	701.2066@5.77	6957.63	8320.68
Polyketides	704.125@17.12	940.952	2996.4
Glycerophospholipids	704.5358@21.77	57597.5	55261.4
Glycerophospholipids	706.4841@16.02	18718.5	24853.2
Glycerophospholipids	707.482@1.44	5629.06	25549.6
Glycerolipids	707.6066@21.53	23187	19848.1
Glycerolipids	709.6217@22.04	56211.4	52702
Glycerolipids	711.6378@22.54	59290.4	59730.6
Glycerophospholipids	716.5194@2.45	2314.24	11295.3
Glycerophospholipids	720.4997@16.02	22853.4	29741.3
Glycerophospholipids	720.5501@23.36	424869	406881
Polyketides	724.1565@20.28	5418.99	16639.3
Glycerolipids	724.6035@3.35	31650	90807.6
Glycerophospholipids	730.5509@22.03	28438.1	27461.9
Glycerophospholipids	732.5662@22.51	37489.6	33960.3
Glycerophospholipids	735.5356@16.02	4492.91	5809.69
Glycerophospholipids	736.5443@21.52	35685.6	34600.8
Glycerophospholipids	736.5445@23.36	59927.4	56694.2
Glycerolipids	737.6532@22.75	42821.3	42496.3
Glycerolipids	739.6692@23.35	106955	97215.4
Polyketides	740.1883@20.28	470615	1.17765e+06
Glycerophospholipids	749.515@16.02	7441.34	9518.35
Glycerophospholipids	751.5077@1.41	3413.86	16559.4
Glycerophospholipids	756.5674@22.27	7818.79	6927.48
Polyketides	757.2151@20.28	445590	1.11202e+06
Prenol Lipids	758.2157@20.28	254984	691244
Glycerophospholipids	758.5821@22.75	21243.3	20597.4
Glycerophospholipids	760.5982@23.21	31687.5	30750.1
Polyketides	763.2101@20.28	2718.11	8481.76
Glycerophospholipids	763.531@16.02	2168.38	2729.05
Sphingolipids	767.6267@3.35	8769.54	17046.5
Glycerolipids	767.7006@24.07	85172	82304.1
	771.2668@22.09	34087.3	33328.7
Glycerophospholipids	772.5985@23.08	10875.4	10485.1
Glycerophospholipids	774.6139@23.59	15239.5	14711.1
	775.225@8.29	6107.97	7552.06
Polyketides	778.1436@20.28	2220.69	6675.69
Sphingolipids	779.5611@16.02	3639.31	4884.59
Glycerolipids	779.7006@23.97	61152.8	55518.8
Glycerolipids	781.7161@24.53	64491.8	62638.6
Polyketides	784.2256@20.28	4044.5	11735.5
Glycerophospholipids	784.5985@23.03	14617.2	13839
Glycerophospholipids	786.614@23.52	37294.4	36775.7
Glycerophospholipids	788.6297@24.08	50265.7	49264.6
Glycerophospholipids	789.5469@16.02	3379.67	4298.28
Glycerophospholipids	790.4915@16.02	16283.3	21893.6
Glycerolipids	791.7006@23.91	70892.3	63839.4
Glycerolipids	793.7169@24.46	144742	139122
Glycerolipids	795.732@25.1	136188	135953
	798.241@20.28	1587.99	4203.45
Glycerolipids	798.6719@24.47	42224.2	39742.8
Glycerolipids	799.6166@2.45	1625.89	10589.5
Glycerophospholipids	800.6297@23.96	38079.2	37076.8
Glycerolipids	800.687@25.1	36683.4	35030.6
Glycerophospholipids	802.6453@24.53	40302.3	38509.5
Glycerolipids	805.7163@24.39	60589.2	56716.4
Glycerolipids	807.7322@24.98	113958	112834
Glycerolipids	809.7475@25.64	89746.8	84410
Glycerophospholipids	812.6297@23.91	43861	44460
	814.2068@21.58	492257	927049
Glycerophospholipids	814.6462@24.46	92600.7	88040.7
Glycerolipids	814.7022@25.69	24843.7	21855.4
Glycerophospholipids	816.6608@25.1	84209.4	83075.9
Glycerolipids	817.716@24.29	38933	35923.7
Glycerolipids	819.7325@24.91	147324	145257
Glycerolipids	821.7478@25.51	229822	220892
Glycerolipids	823.7635@26.35	184687	186361
Glycerophospholipids	824.6299@23.82	8353.87	7509.53
Glycerolipids	824.6878@24.91	43210.2	41733.4
Glycerophospholipids	826.6457@24.39	41086.9	38494.7
Glycerophospholipids	828.6616@24.98	74630.5	68972.3
Glycerolipids	828.7185@26.33	46473.9	45909.1
Glycerolipids	830.6768@25.67	57998.8	53779.8
Glycerolipids	833.7474@25.43	72771.8	73461.4
Glycerophospholipids	834.4989@16.02	2559.88	3288.32
Glycerolipids	835.7631@26.14	110422	112471
Glycerolipids	837.7787@27.06	61264.9	60385.8
Glycerophospholipids	838.6456@24.3	26818.3	25795.9
Glycerolipids	838.7031@25.43	23652.5	22301.2
Glycerolipids	840.6622@24.91	95077.3	93273.7
Glycerolipids	840.7183@26.14	31146.5	28052.2
Glycerophospholipids	841.7@22.87	10886.1	11349.1
Glycerolipids	842.6771@25.52	154829	145131
Glycerolipids	842.734@27.06	15350.8	15768.9
Glycerolipids	844.6928@26.35	118068	111272
	845.2853@23	29967.7	29649
Glycerolipids	845.7474@25.34	70103.2	68380.1
Glycerolipids	847.7636@25.91	218534	216712
	849.2435@11.31	7171.23	8842.93
Glycerolipids	849.7792@26.83	525620	527796
Glycerolipids	851.7948@27.87	114976	120586
Fatty Acyls	852.1624@21.58	4375.05	12139.4
Glycerolipids	852.661@24.79	17533.9	16523.5
Glycerolipids	852.7185@25.92	65152.5	63226.1
Glycerolipids	854.6774@25.43	55952.6	48713.7
Glycerolipids	854.7345@26.83	135651	132265
Glycerolipids	856.6925@26.14	77274.7	72674.4
prenol Lipids	858.2442@21.58	7454.35	19662
Glycerolipids	858.708@27.06	38536.3	37515.1
Glycerolipids	861.779@26.62	54548.3	54680.3
Glycerophospholipids	862.6296@22.86	10530.1	10276.4
Glycerolipids	863.7948@27.59	67960.8	66591.3
Glycerolipids	865.8098@28.67	28557.9	28831.2
Glycerolipids	866.6768@25.35	48334.9	46229.7
Glycerolipids	868.6928@25.92	151940	147659
Glycerolipids	870.7085@26.83	324969	311592
Glycerolipids	871.7633@25.44	42310.8	37793.3
Polyketides	872.2597@21.58	9502.1	24680.3
Glycerolipids	872.7237@27.87	83912.2	83791.2
Glycerolipids	873.7789@26.32	125827	126003
	874.7797@26.32	49603.9	53588.2
Glycerolipids	875.7948@27.34	376315	358561
Glycerolipids	877.8105@28.41	529777	540007
Glycerolipids	878.7344@26.32	38984.4	38343
Glycerolipids	879.8258@29.46	69912	67356.6
Glycerolipids	880.6924@25.93	16908.7	15664.4
Glycerolipids	880.7501@27.34	109557	104593
Glycerophospholipids	881.5623@1.48	2383.42	2195.26
Glycerolipids	882.7081@26.61	40138.7	39307.9
Glycerolipids	882.7658@28.41	140069	139930
Glycerolipids	884.7237@27.6	55041.7	50736.2
prenol Lipids	888.2257@22.4	515383	971558
Glycerolipids	889.8101@28.15	28183.6	29380.9
Glycerophospholipids	890.661@23.63	14635.9	13541.7
	891.2245@22.4	2191.73	5973.65
Glycerolipids	891.8257@29.2	31458.2	30921
Glycerolipids	892.6928@25.44	32787.3	31766.9
Glycerolipids	893.8411@30.23	17359.4	17768.7
Glycerolipids	894.7085@26.33	95437.9	90914.8
Glycerolipids	894.7648@28.15	9374.12	9348.36
Glycerolipids	896.7242@27.34	275615	261484
	897.7623@24.44	23495.2	23001
	897.7643@24.44	23468.7	20617.9
Glycerolipids	898.7396@28.41	396009	392639
Glycerolipids	899.7944@26.79	68492.8	68975.5
Glycerolipids	900.755@29.47	68672.5	66483.9
Glycerolipids	901.8103@27.88	150350	153760
Glycerolipids	903.826@28.95	142117	145947
Glycerolipids	905.8419@29.96	264892	272192
Glycerolipids	906.7653@27.88	46988.2	46210.9
Glycerolipids	907.8514@30.92	40407.1	41873.5
Glycerolipids	908.7812@28.95	47510.2	46389.4
Glycerolipids	910.7972@29.96	69686.7	68415.1
Glycerolipids	912.812@30.91	10197.4	9958.16
Glycerolipids	917.8408@29.72	9602.11	10453.8
Glycerophospholipids	918.6928@24.45	24323.4	24308.8
Glycerolipids	918.7081@25.85	30308.2	29510.1
Polyketides	919.3038@24	26468.9	26378.4
Glycerolipids	919.8566@30.95	18143.6	18367.7
Glycerolipids	920.7238@26.79	49829	47314.2
Glycerolipids	922.7397@27.88	124987	124117
	923.2622@14.55	6451.93	8033.02
	923.7788@24.78	22947.9	22946.1
Glycerolipids	924.7554@28.95	142320	140697
Polyketides	926.1808@22.4	5670.67	15759.7
Glycerolipids	929.8412@29.43	12851.2	12184.5
Glycerolipids	931.8568@30.47	23103.7	23318.7
Polyketides	932.2626@22.4	7887.05	20601.6
sphingolipids	944.7086@24.78	22252.1	23040.1
	946.213@23.28	2840.56	7554.72
	946.2783@22.4	14263.7	35608
	946.7238@25.32	7623.85	7030.84
Polyketides	949.2777@22.4	3686.13	8815.3
Glycerolipids	952.7864@30.48	22396.6	19305.5
	962.2448@23.28	549953	1.07685e+06
	974.7551@26.81	6385.74	5679.43
	993.3228@25.21	24667.6	24671
	1000.1997@23.28	8516.03	23855.5
Polyketides	1006.2811@23.28	9296.41	23855.9
	1020.2971@23.28	17598.5	42913.9
Polyketides	1023.2964@23.28	5217.92	12218.8
	1036.2635@24.34	721515	1.5481e+06
	1053.29@24.34	396819	810934
	1067.3416@26.74	20822.3	20692
Fatty Acyls	1071.2997@20.33	5931.34	7215.06
	1074.2184@24.34	10229.6	28997.4
	1080.3004@24.34	14311.6	36081.4
	1094.3155@24.34	26121.2	61921.1
	1110.2814@25.68	7389.56	20046.6
	1127.3087@25.69	734854	1.71935e+06
	1141.36@28.64	20815.2	20658.3
	1148.2372@25.69	11230.1	32748.9
Polyketides	1154.3187@25.69	16250.4	41101.3
	1164.7404@2.18	2646.04	2571.71
	1168.3349@25.68	31574	73791.3
Polyketides	1184.3006@27.45	4373.42	11471.7
