# Supplementary material for: Enhanced Outer Membrane Vesicle Production in Escherichia coli: from Metabolic Network Model to Designed Strain Lipidomic Profile
Source: Preprints.org preprint supplement (doi:10.20944/preprints202409.1980.v1), 2024-09-25
Supplement: Supplementary file 1 [file supplementary › Table 2.XLSX]

## Sheet: S2_Lipidomic_data
							Putative	MOLECULAR FEATURES				JC8031			ΔgmhA			ΔsgbE			ΔallD			ΔpoxB			QC
	Adduct	mz Error (ppm)	Molecular Weight	Name	Formula	Category	Identification level	[M+H]	Mass	RT	Feature	JC8031-001	JC8031-002	JC8031-003	ΔgmhA-004	ΔgmhA-005	ΔgmhA-006	ΔsgbE-007	ΔsgbE-008	ΔsgbE-009	ΔallD-010	ΔallD-011	ΔallD-012	ΔpoxB-013	ΔpoxB-014	ΔpoxB-015	QC-001	QC-002	QC-003	QC-004	QC-005	QC-006	QC-007	QC-008	QC-009	CV in QCs (%)
	M+H-H2O	5	118.063	Fatty Acyls	C5H10O3	Fatty Acyls	Putative	101.06	100.052	0.97	100.0525@0.97	261.875	353.902	160.234	372.581	191.39	192.003	285.488	186.579	145.942	214.012	182.428	75.7524	169.166	214.531	194.803	406.929	375.945	409.407	433.608	404.021	314.278	395.527	288.539	415.312	12.7931
	M+H	8	100.052	Fatty Acyls	C5H8O2	Fatty Acyls	Putative	101.061	100.053	4	100.0526@4	10892.5	15663.7	8471.9	14422.6	14725.7	15069.5	11495.6	11727.5	11020.8	11909.3	11218	137.084	10996.9	11240.6	10484.8	14293.9	14696.8	14418.6	14856.8	15253.5	14004.7	13857.7	14007.2	14008.2	3.29044
				Unknown			-	105.082	104.074	1.03	104.0736@1.03	1985.23	18464.5	12310	13129.7	8802.77	8658.71	20454.5	19297.3	17642.7	12296.3	6578.78	9.68014	12535.3	10789.2	11427	9588.4	5105.42	10029.9	10039.3	7378.22	9023	8619.1	9193.98	9067.34	18.0052
				Unknown			-	106.066	105.058	0.98	105.058@0.98	93.5794	177.455	146.113	521.67	468.623	275.801	239.218	138.215	241.92	162.688	269.829	85.9782	143.41	150.241	130.301	340.779	443.656	311.284	469.634	324.517	324.46	307.823	328.907	396.4	16.7694
	M+H	7	110.037	Fatty Acyls	C6H6O2	Fatty Acyls	Putative	111.045	110.037	0.96	110.0369@0.96	7626.78	12555.6	4729.08	11233.3	5489.93	6041.24	9312.89	3538.8	3149.05	4082.37	2895.01	101.037	3513.67	6090.16	5116.65	15277.9	17564	15785.4	15608.8	15929.7	14413.7	14322.5	14599.9	14895.3	6.58178
	M+H-H2O	5	128.12	Fatty Acyls	C8H16O	Fatty Acyls	Putative	111.118	110.11	1.62	110.1096@1.62	5032.43	8682.06	3328.08	5606.24	4714.59	5077.87	5832.41	4794.36	4577.08	4071.73	6927.82	139.213	3807	5324.53	2037.71	2103.62	2659.32	2698.36	2874.93	2588.83	2381.26	2677.3	1876.97	2224.4	13.3677
	M+H-H2O	5	128.12	Fatty Acyls	C8H16O	Fatty Acyls	Putative	121.051	120.043	1.05	120.0435@1.05	459.543	6332.86	10421.3	5033.9	4518.17	3215.19	26414.8	27266.1	15771.2	15328.9	12006.3	130.579	21228.8	10110	9863.85	23570	17970.5	24819	25114.5	15442.3	23725.5	23509.4	23234.3	23441.7	14.8059
	M+H-H2O	7	146.058	Fatty Acyls	C6H10O4	Fatty Acyls	Putative	129.054	128.046	4	128.0458@4	55709.9	80502.7	43697.3	76920.1	74048	78568.7	60512.4	59666.7	57777.2	60558.8	59073.1	393.182	57748.5	57144	55504	73662.1	75979	75734.7	73188.5	79319.8	72152.4	71727.1	72854.7	73845	3.20171
	M+H	5	128.047	Fatty Acyls	C6H8O3	Fatty Acyls	Putative	129.055	128.047	4	128.0473@4	56352.6	81862.3	43758.9	76691.8	74410.4	78633	60525.3	59701.2	57703.5	60631.9	59100.3	628.185	58800.9	57346.4	55555.7	73652.3	75944	75970.3	75986	79432	72284.3	72045	72801.3	73883.1	3.1923
				Unknown			-	130.077	129.069	1.09	129.0692@1.09	921.639	5548.44	3587.94	2377.17	3227.88	2333.61	3722.69	4389.34	3888.62	4370.01	4275.99	183.661	16696.8	5004.19	7312.11	8077.95	6828.03	6534.78	9374.78	7679.43	7891.69	9562.01	9090.91	9030.64	13.4118
	M+NH4	6	112.125	Fatty Acyls 8:1	C8H16	Fatty Acyls	MS/MS	130.16	129.152	0.9	129.1518@0.9	6126.73	8439.06	5590.9	9351.18	9598.09	8193.71	9396.35	6985.58	6813.51	7100.62	11234.1	20.9144	8060.96	6938.45	5580.27	8229.73	9349.22	9223.66	8486.59	9193.55	8378.32	8109.55	8068.81	8712.23	5.82118
				Unknown			-	133.078	132.07	1.06	132.0699@1.06	5419.49	24333.6	10805.1	14406.5	14211.6	10925	21775	17852.9	18986.6	20174.5	21592.1	155.205	22686.5	18614.4	19561.9	23895.6	23487.9	24195.7	26710	22693.3	25454.1	26710	25098.3	26490.7	5.96561
	M+H-H2O	4	150.105	Fatty Acyls	C10H14O	Fatty Acyls	Putative	133.102	132.094	1.89	132.0939@1.89	7275.45	16027.1	8382.12	9666.69	7959.8	32792.4	10161.2	7182.63	8380.99	7797.2	5382.49	89.4864	6043.83	6540.16	6307.17	26284.1	26343.4	25989.2	26419.8	27135.8	25871.3	24486.6	25598.2	25829.1	2.77481
	M+H-H2O	4	164.069	Fatty Acyls	C6H12O5	Fatty Acyls	Putative	147.066	146.058	4	146.058@4	3632.62	4900.63	2565.93	4645.63	4748.72	5104.6	3597.03	3607.26	3349.92	3637.4	3655.58	185.89	3720.07	3559.51	3355.49	4249.32	4526.28	4407.87	4573.75	4505.28	4493.59	4028.08	4311.15	4422.43	3.901
				Unknown			-	149.024	148.016	1.39	148.016@1.39	8980.56	16448.8	5420.57	15645.9	7340.27	11921	10835.2	8067.52	11452.5	3585.6	8810.9	525.844	6746.32	11476.3	7697.4	15799.7	19494.2	20264	15511.1	15703.7	16679.5	15661.2	15097.6	16619.1	11.0326
	M+NH4	1	132.006	Fatty Acyls	C4H4O5	Fatty Acyls	Putative	150.04	149.032	1.06	149.0317@1.06	1472.57	16186.6	18655.3	10054.5	9728.88	5210.83	51644.8	55755	33787.5	46208.6	37221.2	86.1822	45868.1	18401.9	24282.2	46329.9	36425	47470.3	47208.6	31677.9	46745	46429.4	46216.7	46461.1	13.0222
				Unknown			-	158.166	157.158	1.08	157.1581@1.08	753.982	6094.9	3849.11	2256.4	2964.87	1439.07	3969.04	3350.25	3385.01	3327.43	4265.19	40.2625	3099.67	2728.56	1731.49	8542.15	8579.97	8775.32	9537.46	7553.74	9150.5	8851.35	8616.24	8940.04	6.20219
				Unknown			-	166.077	165.069	1.1	165.0692@1.1	3840.82	20833.7	11795.2	10146.1	11643.3	6848.15	15917	14874	16464.4	16933.5	16767	61.4117	15424.8	13747.7	13677.9	20094.4	22414.8	20390.9	24186	21088.3	20860.4	21402.3	21284.2	23259.5	6.26637
	M+H	3	172.074	Fatty Acyls	C8H12O4	Fatty Acyls	Putative	173.081	172.073	0.96	172.0734@0.96	25359.8	44078.1	15857.5	43507.1	19036.6	17418.2	36022.8	12139.6	6963.82	13553.7	9897.48	851.142	12126.5	22184.9	18098.8	65175.7	71790.9	66996.7	67367.3	68814.5	61584.3	61555.2	63085.4	63977.7	5.26335
				Unknown			-	173.108	172.101	1.06	172.1006@1.06	69.8704	312.973	140.492	255.998	205.542	196.956	300.218	209.716	269.154	243.689	203.143	9.34002	311.913	209.631	247.325	289.02	331.331	318.738	301.325	330.604	361.95	443.502	265.762	328.206	15.3986
	M+H	3	188.105	Fatty Acyls	C9H16O4	Fatty Acyls	Putative	189.113	188.105	1.89	188.1048@1.89	6516.47	13931.4	6868.07	8139.16	6901.67	27976.4	8637.45	5957.36	6715.18	6750.45	4956.11	70.1552	5145.25	5325.9	5159.65	21749.3	21997.5	21935.4	22649.1	23393.6	20807	21074.5	21013.2	21595.3	3.80109
	M+NH4	5	182.167	Fatty Acyls	C12H22O	Fatty Acyls	Putative	200.202	199.194	1.41	199.1939@1.41	10755.1	15654.7	8593.58	15703.2	15328.6	15811	11811.5	10735.9	11699.9	11565.6	12327.4	234.096	11155.9	11489.7	10054	12692.9	12590.8	12884	13044.6	13627.2	12269.2	12050.4	12106.7	12181.2	4.13372
				Unknown			-	201.115	200.107	1.1	200.1072@1.1	3173.8	15039.1	9609.37	6326.57	9441.39	5787.23	11992.5	13301	11915.7	12587.8	13477.4	106.126	12569.5	10726.1	9839.53	18069.2	18368	17143.6	19085.3	16794.6	17594.6	19297.2	17839.7	17800.6	4.57169
				Unknown			-	201.116	200.108	1.07	200.1079@1.07	389.078	878.823	251.045	495.405	509.201	478.655	650.919	531.558	723.254	638.315	520.708	13.9961	562.228	725.209	528.56	861.14	990.979	952.096	987.183	961.856	857.538	800.179	867.952	1005.58	8.06476
	M+NH4	4	184.146	Fatty Acyls	C11H20O2	Fatty Acyls	Putative	202.181	201.173	0.88	201.173@0.88	673.914	574.218	595.284	1181.51	1055.06	920.633	12701.6	3718.25	6738.58	2435.83	4519.84	26.1531	2248.07	1046.25	1727.22	9384.63	9507.47	9220.28	9601.54	9644.01	9249.56	9443.17	9119.13	9241.48	1.95437
				Unknown			-	207.033	206.025	1.23	206.0251@1.23	5260.06	4249.4	2061.55	3603.18	6645.71	4181.12	4515.19	2860.35	3355.36	2769.7	4905.21	2015.26	4676.93	4742.54	5830.38	4280.23	4013.44	4223.02	5505.38	3427.97	4961.48	3712.95	5827.74	3947	18.5028
				Unknown			-	207.033	206.025	1.47	206.0251@1.47	6343.42	4272.6	2501.27	4547.44	8919.54	5224.46	5762.83	3163.43	3810.14	3531.88	6337.11	2891.28	5667.57	5313.04	6491.06	4537.98	4197.08	4787.77	4905.34	4082.81	5775.58	4251.42	6793.91	4041.03	19.0728
				Unknown			-	207.033	206.025	20.28	206.0251@20.28	2358.4	2171.59	688.367	1471.42	387.98	2997.43	1616.36	1532.85	1297.46	1011.57	1085.33	322.508	939.887	1939.79	571.204	4187.52	4187.39	4487.03	4383.58	4592.37	4039.6	4162.85	4252.07	4255.11	4.05342
				Unknown			-	207.033	206.025	17.12	206.0255@17.12	2869.28	2827.19	938.217	1694.09	486.829	3913.71	2075.88	1589.36	1726.74	1216.73	1417.42	265.086	1115.81	2182.71	653.447	5347.88	5426.98	5317.06	5647.28	6437.84	4888.67	5156.67	5344.41	5116.88	8.14185
	M+H	3	213.209	Tridecanamide	C13H27NO	Fatty Acyls	Putative	214.217	213.209	1.66	213.2093@1.66	4292.22	6475.31	3593.64	6495.42	4540.76	6577.55	5281.78	4068.27	4765.89	3150.65	3779.43	22.3342	4083.85	4926.98	3489.52	7990.48	7724.2	8226.44	8408.47	8744.8	7800.84	7591.24	7814.87	7967.04	4.58232
				Unknown			-	221.085	220.077	17.13	220.0773@17.13	7593.66	7286.15	2436.52	4770.25	1404.27	9520.37	5328.19	4196.92	4734.3	3584.04	3525.31	236.943	3002.57	6204.07	1820.93	14441.9	14657.6	14465.6	15159.4	15069.7	13897	14007.3	13539.8	14334.2	3.68277
				Unknown			-	221.085	220.077	13.82	220.0773@13.82	6252.95	7110.71	2330.5	4375.16	2058.22	8880.25	4801.37	3916.29	4108.44	3196.99	2786.35	59.8376	3062.82	4856.07	1693	12238.5	12450.1	12231.2	12789.7	13234.8	12195.9	12209.3	11607.7	11983.4	3.78
				Unknown			-	221.085	220.077	22.4	220.0773@22.4	4175.7	3446.5	1025.79	2217.81	1503.34	3858.39	2577.45	2090.28	1977.07	1729.65	1836.22	264.571	1382.15	2828.59	715.176	5785.69	6019.04	5864.13	6526.61	6214.23	5835.21	5706.07	5919.68	5713.94	4.48571
				Unknown			-	221.085	220.077	21.58	220.0774@21.58	5434.16	4700.19	2005.8	3316.45	2182.16	6995.44	4943.02	3774.71	3601.64	4102.92	3543.48	500.319	3556.82	3159.39	2929.28	9201.34	9521.3	5578.47	9993.17	11352.1	8933.98	8766.2	10569.4	6971.64	19.7369
				Unknown			-	223.064	222.056	1.9	222.0563@1.9	7427.78	5166.78	2895.22	5071.17	11258.4	5207.97	6051.04	3985.73	4269.55	4572.77	6975.92	2841.49	7493.49	6201.67	6821.87	6056.82	5473.55	5299.42	6070.18	4454.39	6442.81	4871.53	7273.68	5501.18	14.87
				Unknown			-	223.065	222.057	1.23	222.0566@1.23	5958.97	3421.4	2305.06	3303.36	6745.45	4112.76	5068.65	2997.14	3136.11	2646.13	5153.91	2110.64	5300.52	4198.5	5370.09	4723.93	3924.66	4165.5	4637.79	3445.02	5028.63	3855.49	5666.78	4036.48	15.6713
				Unknown			-	223.065	222.057	1.47	222.0566@1.47	7955.95	4961.8	3006.81	4337.16	10644.2	5886.28	6003.41	3965.54	4042.67	3633.22	7483.25	3093.06	7160.23	5978.15	7134.91	5886.24	4710.9	5484.44	5623.93	4344.52	6464.99	5069.47	7859.61	5358.65	18.4088
				Unknown			-	223.065	222.057	2.65	222.0566@2.65	3264.76	2399.31	1328.64	2225.57	5342.83	2560.13	2404	1822.51	2118.45	1835.28	3078.71	1464.06	3623.86	2699.8	2480.46	3015.15	2445.18	2597.35	3222.65	2132.08	3414.49	2488.44	3669.79	2354.7	18.8999
	M+Na	9	202.157	Fatty Acyls	C11H22O3	Fatty Acyls	Putative	225.144	224.136	1.1	224.1363@1.1	35958.5	50600.2	26537.4	45912.5	43558.9	45216.3	37883	35748.3	36212.4	38815.8	37275.5	73.7219	36057.3	36534.7	34493.8	43562.8	44170.1	44601.5	45198.3	45650.7	42472	42229.2	40914.7	42662.4	3.56475
	M+H	9	224.141	Fatty Acyls	C13H20O3	Fatty Acyls	Putative	225.151	224.143	1.1	224.1427@1.1	9052	32240	18181	15778.5	21610.4	10602.5	25397.1	23704.9	24263.9	23245.8	28153.9	8.89583	23144.2	20776.7	20949.3	33732.4	34584.2	34683.1	39126.4	31938.1	36218.8	36211.1	35695.8	36465.2	5.68231
	M+NH4	4	210.198	Fatty Acyls	C14H26O	Fatty Acyls	Putative	228.233	227.225	1.68	227.2251@1.68	6632.33	10415.9	5422.36	10412.9	7755.86	10610.2	8095.64	6055.88	7628.72	5040.22	5439.48	146.344	6076.18	8055.38	5500.24	12535.6	12422.9	12251.4	12165	13455.4	11951.6	12196.5	11964.3	12153.4	3.70684
	M+NH4	4	224.214	Fatty Acyls	C15H28O	Fatty Acyls	Putative	242.249	241.241	2	241.2408@2	4924.11	7993.24	4268	6779.05	4774.94	7694.53	5556.63	4723.59	5187.21	3423.65	3963.47	115.199	5456.89	6063.37	4100.8	9547.88	9183.03	9024.23	9837.03	10209.1	9468.51	9274.97	9758.82	9814.82	3.91156
	M+H-H2O	2	272.178	Fatty Acyls	C18H24O2	Fatty Acyls	Putative	255.175	254.167	1.58	254.1672@1.58	3466.75	2110.43	681.013	575.221	2857.15	3850.02	1389.87	2297.42	1688.88	1180.48	719.28	61.8306	801.445	2503.78	401.746	3642.03	3633.38	3635.58	3739.75	3538.65	3494.09	3472.57	3420.53	3503.27	2.89307
	M+H	3	255.256	Palmitamide	C16H33NO	Fatty Acyls	Putative	256.264	255.256	2.28	255.2564@2.28	16020.6	22379.2	10884.7	20580.4	16618.9	18572.2	20251.8	13297.3	29345.6	13697.1	15226.8	410.895	12770.3	39896.7	13262.3	16088.1	17058.8	17172.6	17690.4	17888.8	15981.5	16018.1	16176.2	15978.7	4.68915
	M+H	4	256.24	Fatty Acyls	C16H32O2	Fatty Acyls	Putative	257.248	256.241	2.45	256.2406@2.45	16993.1	28611	25824.7	19571.4	25777.6	25856	15655.4	23030.3	32260.9	18492.3	23309.7	429.314	19085	18643.4	16607	56915	57293.9	59691.6	60192.9	62100.6	54493.3	55779.5	55486.4	57595.9	4.29601
	M+NH4	4	240.209	Fatty Acyls	C15H28O2	Fatty Acyls	Putative	258.244	257.236	1.71	257.2358@1.71	2284.94	3948.54	2222.61	4062.66	3055.6	4160.6	3263.89	2603.41	2873.86	2063.06	2119.79	382.869	2589.59	2933.57	2132.54	4185.67	4359.28	4182.57	4828.81	4497.7	4379.35	3941.67	4085.29	4059.16	6.31432
	M+NH4	4	240.209	Fatty Acyls	C15H28O2	Fatty Acyls	Putative	258.244	257.236	1.54	257.2359@1.54	7231.01	11796.2	8092.41	10527.1	8675.25	16042.9	8901.09	7029.2	9011.55	6288.02	7018.43	270.081	7164.41	10011	6106.04	11861.8	12583.7	12465.9	12988.5	13035.3	11961.1	11366.4	11655.6	12377.4	4.74417
	M+H	4	258.183	Fatty Acyls	C14H26O4	Fatty Acyls	Putative	259.191	258.183	4	258.1835@4	8275.37	11966.5	6456.35	11145.8	11020.5	11281.4	8948.46	8885.12	8403.36	9106.31	8488.45	75.9577	8691.45	8811.76	7727.77	10865	11496.9	11040.5	11038.9	11922.2	10529.8	10739.5	10358.7	10811.2	4.38078
	M+H	4	264.245	Fatty Acyls	C18H32O	Fatty Acyls	Putative	265.254	264.246	2.53	264.2457@2.53	176469	248710	133695	242973	223750	242153	186728	175240	192194	186527	183247	1164.71	172653	219140	168726	206231	208359	211015	213124	218165	201898	199880	202127	203865	2.90955
	M+H	4	264.245	Prenol Lipids	C18H32O	Prenol Lipids	Putative
	M+H-H2O	3	282.256	Fatty Acyls	C18H34O2	Fatty Acyls	Putative
	M+H	3	266.261	Fatty Acyls	C18H34O	Fatty Acyls	Putative	267.269	266.261	3.35	266.2611@3.35	45415.5	88181.4	31815.8	51194	50523.2	71536.6	44702.5	39037.9	46026.7	49536.8	36251.8	435.093	43294.9	46987.3	43513	77583.4	76464.1	78736.3	81405.2	84387.8	75692	75453.7	75297.8	76433.4	3.98074
	M+H-H2O	2	284.272	Fatty Acyls	C18H36O2	Fatty Acyls	Putative
	M+NH4	4	252.245	Fatty Acyls	C17H32O	Fatty Acyls	Putative	270.28	269.272	2.45	269.2722@2.45	6051.78	9326.9	5279.09	9731.69	7368.31	11615.3	9858.95	5775.86	7067.37	4713.14	5628.04	150.852	6221.43	7001.37	5265.51	11781.4	11893.1	11461.5	12266.3	11872.8	11222.6	11196.3	10783.7	10710.8	4.63147
	M+H-H2O	3	287.282	C17 Sphinganine	C17H37NO2	Sphingolipids	MS/MS
				Unknown			-	273.167	272.159	0.97	272.1593@0.97	472.562	816.606	297.179	710.76	537.703	302.509	185.661	213.404	792.366	406.501	116.889	29.8666	139.682	199.351	575.814	166.899	170.995	188.747	184.5	133.773	149.913	136.875	193.494	178.004	13.2561
	M+H	4	273.267	C16 Sphinganine	C16H35NO2	Sphingolipids	MS/MS	274.275	273.267	1.23	273.2672@1.23	3202.07	3012.74	2538.73	2054.53	1338.62	2336.07	4684.05	2104.93	2489.78	2026.14	2547.74	283.839	2129.36	2891.82	4301.45	8805.7	9535.91	11964.3	9490.19	10282.4	8992.2	8921.73	8658.61	8977.33	10.9859
				Unknown			-	281.052	280.044	1.9	280.0439@1.9	7368.33	4829.5	2291.78	4491.52	10599.4	5038.59	5219.85	3953.51	4170.34	3061.62	6506.67	2721.74	6327.11	4802.23	5697.93	4880.98	3950.34	4287.02	5749.08	3705.37	5650.01	4098.16	6230.34	4465.95	18.7998
				Unknown			-	281.052	280.044	10.36	280.0439@10.36	5509.28	8151.89	3163.8	4809.75	2600.46	9699.98	5739.3	5188.57	5079.54	4542.73	3933.9	341.816	4122.82	5512.94	2479.04	14425.9	15192.6	15272.5	15591.8	16065.4	14005.1	14443.8	14220.7	14240.6	4.85432
				Unknown			-	281.052	280.044	1.47	280.0441@1.47	6564.4	4418.89	2628.81	4737.52	10777.4	5452.92	5315.95	4078.2	4367.17	3232.3	6590.79	2753.71	6521.71	5050.73	5868.43	5742.83	3916.72	4657.36	5845.19	3981.75	5399.86	4313.49	6638.5	4793.31	18.5133
				Unknown			-	281.052	280.044	20.28	280.0441@20.28	10931.1	10597.2	3779.07	6618.42	1864.4	13662.7	8471.72	6254.74	6610.19	5572.12	5690.46	639.563	4218.34	8905.57	2612.02	19730.1	20705.8	20583.3	21411.9	21604.8	19670.9	19776.6	19882.7	20210.9	3.58386
				Unknown			-	281.052	280.044	22.4	280.0441@22.4	3943.31	3011.2	799.497	1783.85	342.438	3335.68	2128.13	1645.42	1782.56	1396.75	1521.83	1130.35	1190.24	2392.41	726.26	5017.76	5188.24	5421.73	5604.02	5528.25	5173.93	5291.03	5194.64	4938.4	4.2299
				Unknown			-	281.052	280.044	17.12	280.0443@17.12	5753.04	5816.37	1773.21	3659.29	1140.99	7296.36	4070.61	3336.65	3536.36	2558.04	2819.13	470.309	2480.02	4595.65	1411.27	10738.5	10965.8	10708.2	11577.1	11723.9	10868.7	10310.1	10372.3	10684.7	4.4492
				Unknown			-	281.052	280.044	13.82	280.0443@13.82	7664.04	8581.51	3014.75	5652.5	2348.58	11214.7	6080.21	4849.94	5088.49	3900.46	3753.5	165.085	3654.58	6600.61	2253.47	15642.7	16291.5	15887.3	16681.4	17383.1	15117.1	14969.2	14971.8	15272.8	5.3312
				Unknown			-	281.11	280.102	1.03	280.1024@1.03	195.829	621.847	300.894	538.694	376.917	481.469	483.985	309.085	377.642	244.318	235.791	14.732	260.554	290.038	208.39	279.857	339.116	348.072	245.087	277.438	272.954	408.67	332.141	286.242	16.3886
	M+Na	1	258.162	Fatty Acyls	C17H22O2	Fatty Acyls	Putative	281.151	280.144	1.06	280.1436@1.06	3471.05	10046	4350.46	5086.97	4700.24	3026.86	10172.1	6141.16	7506.67	8264.95	9749.72	62.1301	9144.26	7589.98	7463.19	12575.9	12403.9	14856.8	15938.1	11988.9	15140.9	13042.7	13079.5	14576.1	10.2553
	M+H	4	282.256	Fatty Acyls	C18H34O2	Fatty Acyls	Putative	283.264	282.256	2.45	282.2563@2.45	15044.5	24254.7	22057.5	18150.9	22362.2	22402.2	14281.5	20272.4	28849.3	16232	19839.6	525.185	17168.7	16717.8	14730	49848.4	50203.6	49149.9	49916.7	51490.2	49128.8	49464.3	50165.5	49480.3	1.45469
				Unknown			-	283.296	282.288	1.11	282.2876@1.11	621.013	2733.89	1445.11	1898.02	2242.14	1453.83	2225.72	2450.62	2347.04	2497.13	2235.9	33.2848	2472.07	2022.96	2253.78	2178.47	1892.94	2109.45	2399.34	1796.85	2488.63	2068.73	2302.66	2291.31	10.5149
	M+H	2	283.288	Stearamide	C18H37NO	Fatty Acyls	Stearamide	284.295	283.287	2.94	283.2874@2.94	1897.97	2780.04	2078.83	3200.52	2445.96	3325.48	7103.22	1987.1	2193.83	1494.53	1672.3	148.507	1865.59	2373.08	1634.11	4978.11	5037.72	5143.9	5342.78	5768.83	5143.58	5090.07	4936.83	4907.76	5.18335
	M+NH4	2	266.261	Fatty Acyls	C18H34O	Fatty Acyls	Putative	284.295	283.288	3.23	283.2875@3.23	1717.65	2633.88	1547.84	3400.26	2355.91	2805.16	2737.62	2243.43	3124.38	1957.39	2226.9	390.446	1907.13	2863.67	1150.74	4383.5	4465.21	4323.18	4143.54	4498.76	3967.73	3931.63	4224.21	4593.23	5.43693
	M+NH4	3	272.235	Fatty Acyls	C16H32O3	Fatty Acyls	Putative	290.27	289.262	1.31	289.262@1.31	8627.44	18052.4	10963.5	13261.9	11477.4	6564.91	13152.9	9411.66	11752.2	5361.73	10736	46.3501	11130.7	7856.25	9895.88	25542.7	25883.8	26019.2	26303.4	26863.3	24826.9	24738.7	24669.7	25359	2.96745
	M+H	5	294.095		C11H18O9	Saccharolipids	Putative	295.104	294.096	22.4	294.096@22.4	2364.84	1862.89	554.49	1087.41	1086.52	2205.79	1197.92	1438.38	976.877	1070.88	1056.91	637.017	646.136	1544.34	496.296	2804.38	3245.15	3044.2	3231.2	3205.09	3013.71	2844.21	3037.39	2965.52	5.27137
	M+H	7	294.095		C11H18O9	Saccharolipids	Putative	295.104	294.096	17.13	294.0965@17.13	2376.75	2377.6	805.956	1655.79	944.154	3099.1	1807.74	1332.9	1517.32	1181.94	1235.12	222.635	1018.74	1999.87	540.479	4632.35	5007.17	4897.42	4766.1	5154.83	4585.07	4476.33	4496.29	4687.68	4.91996
	M+NH4	3	280.277	Fatty Acyls	C19H36O	Fatty Acyls	Putative
	M+NH4	4	280.277	Fatty Acyls	C19H36O	Fatty Acyls	Putative	298.311	297.303	3.36	297.3035@3.36	11843.5	16865.3	10033.8	18442.1	13609.1	21445.9	15190.3	11199.9	13692.3	9315.95	10356.7	258.579	12200.3	14464.3	9419.11	20894	21237.5	21215.3	21843.9	22407.9	21208.9	20830.9	20640.2	20808.5	2.66577
	M+NH4	4	280.277	Fatty Acyls	C19H36O	Fatty Acyls	Putative	298.312	297.304	3.96	297.3036@3.96	6126.06	9832.45	5586.39	9352.16	7730.07	11281	7929.19	6246.17	7542.85	5189.78	5820.67	124.398	6587.59	7858.24	5119.72	11429.5	11716.8	11733.9	12059.4	12291.4	11521	11296.9	11652.1	11210.7	2.99192
	M+H	5	303.256	Arachidonoyl amine	C20H33NO	Fatty Acyls	Putative	304.262	303.254	2.53	303.2542@2.53	3253.9	4243.76	2368.42	4278.44	3936.44	4391.03	3398.31	3087.07	3558.52	3193.27	3301.89	91.0121	3213.6	4186.24	2815.93	4133.58	4208.89	4276.8	4219.22	4436.86	3850.78	4028.02	3919.51	3968.98	4.59953
	M+H	6	303.307	Palmitoyl-EA-d4	C18H33D4NO2	Fatty Acyls	Putative	304.313	303.305	1.05	303.3047@1.05	672.202	3255.66	3132.71	3285.28	3178.29	2539.71	3359.87	3569.09	2904.05	2637.03	1880.83	26.1121	3470.06	2961.32	3243.29	2512.92	2235.16	2592.38	2910.43	1914.84	3233.94	2934.65	2917.7	2907.21	15.3128
	M+H	4	310.287	Fatty Acyls	C20H38O2	Fatty Acyls	Putative	311.296	310.288	3.35	310.2877@3.35	30342.8	53399	20600.4	33686.1	31570.4	46579.3	26196.9	25482.7	31865.6	31952.9	23251.6	363.833	27729.4	30052.3	28344.6	47607.6	48418.4	47389.7	49286.6	50070.7	46613.2	46649.7	47041.6	46359.6	2.69927
	M+H-H2O	3	328.298	Hydroxyphytanic acid	C20H40O3	Prenol Lipids	Putative
	M+H-H2O	3	328.298	Hydroxy-eicosanoic acid	C20H40O3	Fatty Acyls	Putative
	M+NH4	2	294.292	Fatty Acyls	C20H38O	Fatty Acyls	Putative	312.327	311.319	4.08	311.3189@4.08	4385.91	6502.09	4153.27	6955.78	4953.12	7652.95	7765.4	4062.86	5122.33	3850.26	3709.94	89.8359	4436.32	5525.48	3418.26	8938.14	9492.94	9075.58	9267.8	9512.1	8817.53	8528.26	8458.28	8662.74	4.39271
	M+NH4	2	294.292	Phytenal	C20H38O	Prenol Lipids	Putative
	M+H-H2O	2	329.329	N,N-dimethyl-Safingol	C20H43NO2	Sphingolipids	Putative
	M+NH4	3	298.178	Fatty Acyls	C16H26O5	Fatty Acyls	Putative	316.213	315.205	0.97	315.2048@0.97	4929.13	1200.3	1030.76	1171.38	1001.41	1132.89	10214.9	6542.74	10215.8	4316.03	4693.23	18.147	3894.38	5880.11	3279.43	2674.29	2933.29	2861.53	3063.31	2694.82	2667.87	2551.39	2653.96	2926.86	6.11225
	M+H-H2O	2	338.318	Fatty Acyls	C22H42O2	Fatty Acyls	Putative	321.316	320.308	4.86	320.3082@4.86	12588.7	17530.2	7276.31	35317.7	16773.4	11630.2	11279.9	5689.22	18910.8	12672.4	8938.84	1959.83	6210.31	20731.3	8043.69	46745.1	46020.1	48110	47680.8	49069.5	45144.4	44272.6	43707.2	44682.9	4.03371
	M+H-H2O	2	338.318	Fatty Acyls	C22H42O2	Fatty Acyls	Putative	321.316	320.308	4.64	320.3085@4.64	75536.3	157433	45693.8	147757	66388.6	53555.3	102360	42455.5	217905	45381.7	58128.4	1385.12	42035.3	277264	34878.1	147084	147025	147591	149114	154685	141441	140097	142943	143904	3.05614
	M+NH4	3	308.308	Fatty Acyls	C21H40O	Fatty Acyls	Putative	326.343	325.335	4.84	325.3349@4.84	8979.41	13334.2	7674.52	13423.5	10137	17226	10775	8536.13	10426.7	7564.38	7970.94	128.156	8964.53	10620.1	6887.22	17335.2	17973.5	18314.5	18628.7	19208.4	17763.1	16770.9	17602.4	17966.3	3.98885
	M+H	3	330.277	MG(16:0)	C19H38O4	Glycerolipids	MG(16:0)	331.285	330.277	2.45	330.2775@2.45	24262.4	40184.1	38508.9	27807.7	38500.3	36247	22350.3	33903.9	48021	26493.4	33897.4	573.762	28212	27616.3	23299.1	89469.5	91668.6	96795.2	97733.9	101803	87280.4	86008.1	89759.8	90446.1	5.71972
	M+H-H2O	2	354.204	Hydroperoxy--[epidioxy-(octenyl)-cyclopentyl]-heptenoic acid	C19H30O6	Fatty Acyls	Putative	337.202	336.194	1.89	336.194@1.89	3569.73	7608.33	3773.72	4542.46	3757.19	15919	4791.79	3203.83	3842.92	3774.85	2838.34	24.3753	3072.59	3001.18	2955.03	12214	12385.5	12033.7	12562.6	13223.1	11878.3	11678.7	11977.7	11937.1	3.81215
	M+H-H2O	3	355.345	Eicosanoyl-EA	C22H45NO2	Fatty Acyls	Putative	338.343	337.335	4.86	337.335@4.86	12440	16212.8	6340.54	35224.9	16918.7	11658.5	10259.9	7058.24	18766.9	12564.8	9449.25	1230.39	6482.78	20823.6	6973.57	45962.9	45456.8	47785.3	48225	48996.5	45066.8	43920.5	43748	44734.8	4.15996
	M+H	1	339.35	Docosanamide	C22H45NO	Fatty Acyls	Putative	340.358	339.35	6.32	339.35@6.32	2265.86	3940.98	2004.48	3620.66	2710.12	4629.31	2729.63	2280.2	2802.69	1927.64	2196.51	159.919	2393.15	2943.69	1888.98	4918.85	4962.25	5143.06	5218.42	5086.18	4764.31	4660.76	4797.4	4629.7	4.30851
				Unknown			-	341.019	340.011	20.28	340.0109@20.28	3974.34	4020.35	1235.66	2577.71	775.2	4625.34	2548.09	2270.31	2522.84	1927.63	2016.42	268.196	1749.29	3183.65	934.038	7157.08	7007.21	7362.1	7322.43	7800.05	6877	6716.17	7055.79	6898.01	4.57035
				Unknown			-	341.019	340.011	17.12	340.0111@17.12	6600.06	6775.72	2124.3	4274.09	1492.9	8646.22	4698.55	3930.04	4177.27	3262.52	3321.25	233.8	2815.77	5232.47	1729.08	12211.3	12367.9	12747.2	13676.3	13755.1	12187.4	12161	12261	11958.2	5.33376
	M+NH4	3	336.339	Tricosenone	C23H44O	Fatty Acyls	Putative	354.374	353.366	7.6	353.366@7.6	4162.17	7118.58	3882.85	6884.85	5228.38	9057.66	5447.51	4535.78	5386.66	4089.43	4081.23	20.0296	4591.47	5672.58	3687.19	8472.01	8526.57	8497.12	8759.93	9433.87	8331.27	8152.44	8307.03	8538.1	4.33168
	M+NH4	3	336.339	Tricosenone	C23H44O	Fatty Acyls	Putative	354.374	353.366	6.5	353.3662@6.5	5097.63	7504.14	4394.05	7788.97	6014.42	9942.76	6668.25	4964.46	5878.27	4189.31	4576.87	9.52006	4945.46	6413.71	4547	9290.59	9216.65	9324.08	9618.87	9607.03	8965.32	8722.93	8680.81	9342.09	3.72198
				Unknown			-	355.071	354.063	20.28	354.0628@20.28	9587.44	9187.28	2959.39	6073.56	1728.08	11479.6	6899.36	5069.8	5856.75	4116.33	3721.49	357.623	3672.97	7496.71	1982.97	17365.2	17909.3	17813.7	18228	19040.1	16829.4	16521.7	17423.8	17197.2	4.31701
				Unknown			-	355.071	354.063	13.82	354.0629@13.82	25461.7	28663.4	9704.95	18718.1	8051.55	37648.5	20343.7	16106.1	17704.5	13202.4	13126.5	122.12	12333.8	21536.8	7266.28	53106.2	53930.8	55149.4	56791.2	58380	51382.8	51467.7	52553.1	52301.2	4.50892
				Unknown			-	355.071	354.063	2.65	354.0629@2.65	4607.47	3423.23	1679.43	3030.62	6561.96	3577.94	2929.39	2688.71	2990.94	2321.07	3990.42	2025.06	4216.43	3847.11	3145.94	3885.06	3010.07	3518.2	4324.41	2875.87	4265.11	3083.38	4773.14	3171.69	18.6639
				Unknown			-	355.071	354.063	22.4	354.063@22.4	8871.45	8463.09	2592.27	5104.24	1738.04	10663.5	6238.83	5024.74	5451.28	4781.39	4682.56	801.633	3381.73	7249.32	2293.35	14774.4	15460.2	15069.9	15925.5	16491.5	14347.8	14496.8	14614	14685.6	4.79493
				Unknown			-	355.071	354.063	17.12	354.063@17.12	16229.9	15738.6	4913.98	10527.5	3155.04	20661.3	11408.2	9086.58	9630.22	7936.31	7928.43	91.2918	6296.51	12575.6	3760.74	29800.4	30947.7	30301.9	31772.3	33288	29232.6	28756.4	28805.3	29374.1	5.00733
				Unknown			-	355.071	354.063	21.58	354.0631@21.58	18372.8	17495.7	6013.79	11786.9	4230.14	22852.6	12957.8	10299.8	11953.3	10063	9794.41	2049.91	7890.05	15025.4	5721.33	31627.4	32481.5	33104.6	33011.2	34604.7	31438	31212.8	31487.5	31339	3.54178
				Unknown			-	355.071	354.063	24.34	354.0631@24.34	1817.36	2144	633.275	1261.37	698.434	2878.22	1367.12	1197.58	1484.67	1277.43	1318.14	554.863	769.136	1609.1	623.917	3439.6	3153.06	3133.89	3592.97	3528.55	3217.61	3071.95	3069.82	3221.93	6.08252
	M+H	9	356.272	Fatty Acyls	C24H36O2	Fatty Acyls	Putative	357.282	356.274	2.45	356.274@2.45	3614.09	5705.05	4869.4	4207.33	5059.12	5219.04	3275.12	4481.2	6384	3885.96	4841.34	90.6406	3950.55	3822.7	3286.62	10478.4	10408.2	10802.9	11285	11356	9695.95	9715.55	10584.8	10436.7	5.53264
	M+H	9	356.272	Sterol Lipids	C24H36O2	Sterol Lipids	Putative
	M+H	3	358.308	MG(18:0)	C21H42O4	Glycerolipids	Putative	359.317	358.309	3.35	358.3087@3.35	88948.6	174597	61413.4	98956.5	95975	139221	87319.4	74677	90566	94828.4	68659.3	595.214	84419.6	90735	84617.3	155248	157177	162608	167496	174974	153106	151455	152841	156672	4.9339
				Unknown			-	363.311	362.303	1.92	362.3033@1.92	238.35	231.315	438.585	1007.99	227.166	483.549	864.191	412.278	86.3982	348.162	236.989	75.3019	198.461	653.947	354.621	1578.61	1698.57	1505.21	1608.1	1560.55	1411.03	1413.47	1342.54	1552.28	7.38613
	M+NH4	2	350.355	Tetracosenal	C24H46O	Fatty Acyls	Putative	368.389	367.382	7.79	367.3816@7.79	2116.18	3576.11	1967.32	3530.6	2577.38	4365.64	2708.44	2212.02	2803.89	2105.01	1976.99	124.78	2189.37	2917.44	1958.69	4119.79	4046.8	4050.94	4045.09	4498.99	3773.71	3835.01	3870.09	3990.06	5.26713
	M+NH4	2	350.355	Tetracosenal	C24H46O	Fatty Acyls	Putative	368.39	367.382	8.61	367.3817@8.61	8934.83	13483.7	7465.24	13360.4	9872.6	17730.8	10538.6	8481.29	10195.5	7758.19	7952.53	213.921	8854.62	10049.7	7161.37	18030.1	18077.3	18654.4	18715.2	19278.6	16918.7	17540	17533.8	17745.4	4.02135
				Unknown			-	371.102	370.094	2.65	370.0942@2.65	10633.5	7643.91	3998.6	6271.94	15990.9	8496.91	7882.97	6278.98	6793.34	5724.47	10247.9	4728.07	9997.29	8827.98	7677.88	8613.73	7725.27	8103.73	9622	6402.83	9710.15	7129.35	11211.9	7945.88	17.3743
				Unknown			-	371.102	370.094	3.9	370.0943@3.9	4481.98	4046.87	1972.04	3220.67	7488.09	3909	2815.97	3191.97	3164.05	2866.46	4115.42	2430.04	4290.48	4378.21	2105.3	4520.77	3490.77	3950.99	4651.43	3117.49	5113.22	3365.04	5233.85	3688.31	18.8833
	M+H	3	370.308	Fatty Acyls	C22H42O4	Fatty Acyls	Putative	371.317	370.309	4	370.3089@4	51734	76061.4	39933	72356.6	70499.9	71828.2	57357.7	54995.8	53038.9	55035.9	53760.4	524.445	54034	53103.8	50513.2	69483.4	71601.1	70682.9	70014.9	75662.4	68252.1	67925.9	67576	70082.6	3.50733
				Unknown			-	382.405	381.397	9.14	381.3974@9.14	5327.96	7853.31	4608.97	8089.9	6190.3	10806.1	6621.16	5073.27	6164.43	4853.12	4982.56	31.0387	5575.93	6178.61	4468.47	10159.9	10256.5	10940.8	10896.8	11517	10466	10265.3	10084.7	10407.4	4.45777
	M+H	6	386.182	Bromo-eicosa-dienoic acid	C20H35BrO2	Fatty Acyls	Putative	387.187	386.179	1.03	386.1791@1.03	12538.8	35914.3	14965.8	24719.3	15313.8	20684.6	24632.7	18762.6	21449.4	18167.2	13234.5	112.174	11538.4	13141.7	10344.2	16417.8	16783.9	15976.6	16169.5	16659.8	15051.8	15544.9	15126.7	15447.9	4.0691
	M+NH4	6	369.155	PC(6:0)	C14H28NO8P	Glycerophospholipids	Putative
				Unknown			-	394.348	393.34	7.98	393.3401@7.98	85712.5	124512	66253.1	116676	112910	118666	90709.1	87466	89005.4	92876.7	89475.8	704.076	88075.1	87678.3	82865.2	112960	114781	114207	116690	121464	110393	110362	110099	111508	3.27828
	M+K	3	370.308	Phellogenic acid	C22H42O4	Fatty Acyls	Putative	409.272	408.265	4	408.2646@4	6453.84	9316.13	4737.62	8714.9	8598.9	8981.61	6875.23	6534.33	6280.98	6741.9	6818.82	147.737	6562.62	6607.04	6228.66	8361.04	8435.95	8567.44	8356.51	9006.88	8231.83	8130.45	7941.7	8401.22	3.55169
	M+H-H2O	3	426.277	Hydroxy-didehydrovitamin D3 26,23-lactone	C27H38O4	Sterol Lipids	Putative
				Unknown			-	413.184	412.176	1.03	412.1758@1.03	3117.84	9114.14	3979.52	6283.76	3865.26	5426.63	6237.47	4762.82	5588.19	4584.53	3314.02	17.1392	3145.27	3642.71	2684.97	4150.69	3979.5	4051.3	4086.24	4166.96	4134.79	3747.13	4006.47	3757.4	3.95747
				Unknown			-	415.037	414.029	10.36	414.0295@10.36	3037.72	4463.43	1708.82	2461.25	1388.16	5204.51	3061.33	2661.76	2833.6	2146.34	2175.76	45.435	2254.17	2943.62	1345.47	7913.62	7816.77	7898.01	8238.63	8516.45	7475.54	7389.77	7235.4	7494.99	5.3963
				Unknown			-	415.038	414.03	20.28	414.0296@20.28	3359.42	3405.67	1108.12	2045.24	734.455	4302.38	2562.46	2012.01	2113.81	1354.9	1677.88	169.896	1554.51	2599.23	833.083	5931.27	5952.96	6126.23	6239.96	6669.71	5853.3	5773.53	5886.15	5998.29	4.50569
				Unknown			-	415.038	414.03	13.82	414.0297@13.82	4002.78	4158.37	1491.82	3059.23	1236.78	5877.1	3202.53	2543.1	2824.47	2153.36	2194.96	69.5475	1950.28	3283.58	1256.36	7864.25	8226.26	8243.59	8644.26	8789.53	7686.24	7669	7820.08	8003.96	4.98896
	M+Na	6	392.22	Fatty Acyls	C22H32O6	Fatty Acyls	Putative	415.212	414.204	1.06	414.2037@1.06	86437.9	110973	41370.1	71766.3	55910.2	73150	98195.4	57116.4	75270.5	87989.5	109869	178.086	87356.8	90718.6	77658.7	147053	150279	150558	153289	155178	141099	143466	143042	144088	3.37543
	M+Na	8	404.314	Ventosic acid	C22H44O6	Fatty Acyls	Putative	427.306	426.298	1.54	426.2985@1.54	213.863	336.515	182.175	288.806	248.877	354.275	4461.2	2723.33	1397.76	11485	1683.43	99.2988	23984.5	7941.52	16449.2	20696.4	21872.6	21891.4	22338.4	22477.4	20817.1	20138.6	20417.5	20425.5	4.2746
				Unknown			-	429.09	428.082	20.28	428.0817@20.28	14199.1	13439.3	4241.45	9081.97	2707.79	17537.2	10289.8	7867.38	8793.72	6952.16	7284.25	593.483	5675.83	11551	3191.88	25987.5	26475.2	27018.4	27755.7	28711	25430.3	24945.6	25394.3	25840.5	4.66248
				Unknown			-	429.09	428.082	21.58	428.0819@21.58	6603.21	7034.42	2329.32	4926.07	1855	8356.01	4628.15	4203.27	4560.05	3682.29	3647.93	683.167	2911.29	5672.45	1963.05	11345	11909.9	11587.2	12284.6	12565.5	11207.1	11115.9	11692.3	11317.1	4.28047
				Unknown			-	429.09	428.082	22.4	428.0819@22.4	11070.1	10957.7	3270.58	6867.25	2512.61	13660.6	7636.86	6149.98	6913.69	5951.23	6357.31	946.289	4397	8854.28	2685.55	19368	19394.7	19218.8	19859.9	21144.7	18527.6	18352.2	18615.3	18384.1	4.67905
				Unknown			-	429.09	428.082	17.13	428.082@17.13	30443.7	29841.4	9435.68	19492	6851.73	38979.9	21558.7	16852.3	18167.8	14631.7	14737.4	305.395	12382.2	24553.2	7792.91	57619.1	59874.3	59969.3	61904.8	64056.4	56445.4	56702.1	57062.6	58714.4	4.35379
				Unknown			-	429.09	428.082	24.34	428.082@24.34	2174.8	2099.76	644.36	1269.17	391.834	2564.83	1566.49	1251.82	1426.9	1088.87	1306.83	281.698	899.4	1768.46	445.996	3858.21	3644.17	3707.88	3928.68	4186.94	3658.25	3538.97	3499.15	3562.83	5.95767
				Unknown			-	429.09	428.082	23.28	428.0821@23.28	5153.84	5525.04	1693.59	3256.4	1160.62	6936.51	3678.61	2910.63	3365.25	2995.76	3306.39	576.465	2064.81	4260.87	1312.9	9388.53	9131.44	9568.14	9756.06	9939.11	8969.76	8951.86	9280.32	9291.58	3.61821
	M+H-H2O	10	448.319	Sterol Lipids	C27H44O5	Sterol Lipids	Putative	431.32	430.312	23.36	430.3121@23.36	41284.8	58286.2	31613.2	50150.2	53138.4	55634.7	36669.5	35906	40203.9	46307.5	44447.2	41455.2	38881.1	37849.4	35940.9	39211.5	45999.7	38408.5	40389	38293.6	38407.8	42002.5	41952.3	37239.2	6.79861
				Unknown			-	441.216	440.208	1.06	440.2079@1.06	15957	19961.8	7859.67	13218	10786.8	13351	17911.7	10251.5	13586.6	16129.3	20141.8	72.2756	16050.9	17065.3	14197.2	27943.5	27851.2	27968.9	27609.9	29101.1	26636.6	27015.2	26398.2	26737.9	3.12169
	M+H	7	444.324	Sterol Lipids	C28H44O4	Sterol Lipids	Putative	445.334	444.327	2.45	444.3266@2.45	26920.8	42956	40046	32138.2	40421.8	40485.5	24965.7	36010.1	52549.4	28861.9	36069.1	257.931	31186	30278.2	26691.9	93375.9	92658.4	93191.9	94379.6	95920.2	90479.7	90767.9	90077.7	90496.2	2.20932
	M+K	4	414.213	Bromo-docosa-dienoic acid	C22H39BrO2	Fatty Acyls	Putative	453.175	452.167	1.06	452.1669@1.06	3754.57	5252.37	1948.04	3256.18	2635.75	3528.86	4560.43	2744.01	3460.37	3863.69	4761.89	62.4423	3776.28	4130.55	3145.94	6297.26	6597.75	6274.09	6609.6	6650.98	6249.52	6274.59	6249.04	5855.42	3.93369
				Unknown			-	453.22	452.212	2.84	452.2119@2.84	7861.07	11061.7	5727.15	9584.72	10062.4	10469.5	7062.31	6624.62	6578.79	8230	7911.94	21.1111	7737.83	7625.2	7406.78	9042.15	9070.33	9141.85	9035.25	9577.42	8582.24	8522.61	8910.31	8411.1	4.08638
				Unknown			-	471.332	470.325	1.53	470.3246@1.53	403.226	581.675	353.094	549.166	451.337	595.639	5857.28	3459.2	2069.07	16205.8	2013.64	63.6356	36916.6	11088.3	24231.4	31067.8	31234.2	31415.4	32304.5	33193.9	30051.9	29879.5	29585.7	30030	3.9271
	M+H	7	472.355	Prenol Lipids	C30H48O4	Prenol Lipids	Putative	473.366	472.358	3.35	472.3579@3.35	77222.8	138932	52233.4	87121.5	81626.4	115875	67971.6	63794.9	79319.1	82038.9	57961.6	37.5185	71892.2	76079.3	73035.6	121830	123126	122659	122135	126692	120153	119543	120652	119023	1.91203
	M+H	7	472.355	Sterol Lipids	C30H48O4	Sterol Lipids	Putative
	M+H	5	482.286	Sterol Lipids	C30H42O3S	Sterol Lipids	Putative	483.29	482.282	2.45	482.2823@2.45	2261.34	3467.17	3083.1	2684.35	3325.09	3133.29	2037.02	2743.91	4204.17	2352.51	2650.62	68.3343	2422.48	2407.64	2114.11	6943.78	6962.49	6942.27	6821.92	7348.24	6384.32	6742.82	6451.96	6749.98	4.2317
	M+Na	0	460.301	Vitamin D2-sulfur dioxide adduct	C28H44O3S	Sterol Lipids	Putative
	M+K	7	444.324	Sterol Lipids	C28H44O4	Sterol Lipids	Putative
	M+H	7	484.28	PG(16:0)	C22H45O9P	Glycerophospholipids	Putative	485.291	484.283	1.89	484.283@1.89	33774	77331	38166.6	43661.8	36301.7	162081	46564.2	30855.9	35941.6	36620.4	26834.6	191.658	27924.7	29134.6	27387.3	124384	125895	127804	130719	134065	120697	119973	121219	122119	3.89152
	M+Na	8	462.298	Sterol Lipids	C27H42O6	Sterol Lipids	Putative
	M+H	3	484.355	Sterol Lipids	C31H48O4	Sterol Lipids	Putative	485.361	484.353	0.98	484.3531@0.98	1767.65	499.189	289.429	652.993	625.655	372.249	17102	7613.13	17003	6300.01	9548.62	55.8599	6406.56	5624.63	4220.64	17384	17471.7	17741.7	17296.7	18687.6	16639.1	16212.4	16946.9	16681.8	4.22458
	M+Na	2	462.371	(Hydroxypropyl)-dihydroxy-norvitamin D3	C29H50O4	Sterol Lipids	Putative
				Unknown			-	489.056	488.048	17.12	488.0483@17.12	3659.09	3699.17	1151.23	2593.06	913.985	4938.92	2781.29	2161.99	2284.79	1820.56	1650.98	156.981	1583.89	2964.92	1040.81	6772.53	6748.19	6913.54	7248.04	7394.56	6529.06	6345.38	6632.63	6587.65	4.99927
				Unknown			-	489.057	488.049	13.81	488.0486@13.81	4409.61	5075.5	1805.27	3322.33	1419.01	6371	3598.84	2965.56	3144.2	2398.65	2327.92	87.293	2147.52	3545.45	1245.23	8838.68	9277.59	9036.94	9897.53	9596.09	8624.68	8638.61	8822.93	8978.86	4.78882
				Unknown			-	503.108	502.1	22.4	502.1003@22.4	3253.92	2863.83	1014.36	1904.5	740.409	4018.04	2253.86	1922.11	2084.85	1561.75	1712.41	201.878	1275.4	2590.15	710.534	5270.33	5837.55	5306.05	5615.99	6127.67	5254.59	5026.46	5563.99	5351.26	6.18416
				Unknown			-	503.108	502.1	20.28	502.1004@20.28	24191.6	23151.5	7264.28	15491	4455.94	29844.9	16896.3	12636.3	14865.9	11238	11922	559.016	9370.08	19022.2	5577.67	44190.5	46123.2	45195.6	45790.6	48808.6	44089.2	42705.5	43735.1	44793.9	3.90862
				Unknown			-	503.108	502.1	10.36	502.1004@10.36	7184.28	10426.6	3886.96	5932.99	3387.92	12225.8	7073.29	6208.8	6522.82	5225.9	4799.38	114.3	5103.41	6722.57	3315.83	18561.3	18580.6	18745.1	19858.2	19871.3	17409.1	17760	17592.5	17855.1	4.97854
				Unknown			-	503.108	502.101	23.28	502.1006@23.28	5029.39	4774.47	1764.99	3038.77	1094.71	6338.32	3492.6	2940.55	3404.37	2898.54	3069.3	609.825	2036.4	4085.28	1337.1	8928.25	8822.88	9223.48	9376.33	9739.19	8663.55	8379.91	8454.08	8690.8	5.02621
				Unknown			-	503.109	502.101	21.58	502.1007@21.58	8566.49	7911.45	2665.32	5534.78	1808.94	10407.5	6067.13	4584.55	5164.85	4449.8	4707.63	594.082	3395.77	6837.5	2215.73	14371.7	15457.7	14897.7	15487.3	16180.4	14157.3	13933.7	14575.7	14194.5	5.11226
				Unknown			-	503.11	502.102	24.34	502.1016@24.34	5231.46	5116.79	1813.12	3301.42	1169.78	6454.81	3852.86	2949.81	3428.84	2935.59	2980.3	676.968	2129.43	4129.76	1455.7	8870.81	8926.47	8804.66	9191.2	9872.11	8334.34	8010.45	8407.29	8480.58	6.26075
				Unknown			-	506.368	505.36	2.45	505.3601@2.45	2792.73	4529.57	4002.42	3506.63	4129.3	4342.76	2574.09	3624.86	5251.01	3090.95	3726.18	17.7318	3269.45	3075.25	2883.42	9140.76	8862.69	9204.3	9192.47	9443.64	8744.38	9145.84	8370.56	9080.48	3.50507
	M+NH4	8	493.25	Epothilone A	C26H39NO6S	Polyketides	Putative	511.287	510.279	1.89	510.2795@1.89	7406.85	15996.1	8082.49	9555.38	7769.08	31775	9793.77	6587.27	7498.49	7810.97	5654.54	41.6456	6031.36	6003.94	5845.97	25427	25085.9	25829.5	25578.6	26673.6	24047.1	24043.7	24097.9	24306.6	3.77463
				Unknown			-	515.359	514.351	1.51	514.351@1.51	667.194	828.851	620.475	820.005	962.161	888.454	7968.85	4597.89	2975.95	24128	2913.82	153.017	59169.3	15419.7	36428.6	46046.4	46534.3	46921.6	47789.6	49496	44383.2	43847.2	44292.7	44825.9	4.07305
	M+NH4	5	501.103	Carboxypyranopelargonidin O-beta-glucopyranoside	C24H21O12	Polyketides	Putative	519.14	518.132	10.36	518.1319@10.36	46411.3	67447.1	25047.4	37740.9	19943.4	80207.2	46617.9	39287.4	42096.7	33583.8	31229	350.903	32828.2	44263.4	19269.1	123831	125270	126472	132087	138170	117851	118053	119233	123375	5.38825
	M+H	3	521.13	Petunidin (acetylglucoside)	C24H25O13	Polyketides	Putative	522.138	521.13	10.36	521.1303@10.36	4481.4	6910.62	2489.35	4110.43	2069.75	7784.87	4764.42	4044.79	4307.13	3568.66	3258.34	91.1194	3445.68	4351.89	1984.76	11841.6	12026.7	12000.6	12683.7	12977.8	11570.3	11590.9	11337.2	11947.5	4.41386
	M+K	7	484.28	PG(16:0)	C22H45O9P	Glycerophospholipids	Putative	523.247	522.239	1.89	522.2387@1.89	1312.04	2723.76	1484.82	1928.51	1450.9	5601.68	1936.23	1256.31	1247.26	1296.19	1084.51	7.41855	1127.77	1055.99	1020.87	4447.4	4737.1	4627.85	4737.98	4912.63	4455.64	4317.96	4503.84	4437.44	4.16287
				Unknown			-	524.577	523.569	17.11	523.5693@17.11	4714.6	10939.6	5411.75	7722.47	5331.08	1137.68	5430.89	4741.8	6098.3	1711.25	5096.04	14.2065	4490.85	3666.06	5024.29	11060.6	11187.9	11262.4	11534.2	12197.3	10315.1	10977.5	10294.1	10891.8	5.29001
	M+H	6	530.264	PG(20:5)	C26H43O9P	Glycerophospholipids	Putative	531.275	530.267	1.94	530.2669@1.94	6194.44	13989.1	4136.9	6532.18	4841.94	7895.54	5975.64	4547.92	5516.49	4467.94	4834.17	7.86049	3805.35	7607.97	3071.66	1832.62	1859.02	1744	1935.56	2012.81	1763.43	1792.03	1718.06	1812.23	5.16716
	M+H-H2O	1	548.277	Myristinin A	C33H40O7	Polyketides	Putative
				Unknown			-	531.355	530.347	2.45	530.3474@2.45	942.411	1092.34	1025.93	1296.62	1458.96	1108.06	967.518	986.902	1318.2	711.66	972.636	197.171	760.517	769.663	721.147	1651.49	1866.3	1673.96	2157.62	1940.15	1864.97	1888.08	1834.92	1732.56	8.3269
				Unknown			-	536.577	535.569	20.52	535.5695@20.52	977.578	1883.35	882.034	1201.76	1142.07	8656.54	1448.32	1400.25	1183.96	2628.95	855.336	51.701	832.376	1065.97	882.924	3459.97	3448.74	3646.97	3549.74	3869.73	3513.69	3725.81	3578.23	3656.48	3.75514
				Unknown			-	537.536	536.528	12.47	536.5284@12.47	193.791	2322.52	330.389	9770.5	11921.3	3387.29	3509.35	5141.6	2563.98	1491.89	14490.5	527.846	24682.1	869.348	2156.75	15544.9	17019.8	15905.7	16538.7	17698.8	15597.8	15348.6	15732.8	15723.1	4.91764
				Unknown			-	552.609	551.601	19.81	551.6009@19.81	25650.1	58884.9	28146.6	39277.3	28556.2	6448.52	29828.4	27037.2	33765.8	9147.95	24694.4	100.271	22856.4	17096.6	27187.1	59878.3	60603.9	60529.6	61145.8	64357.8	57488.9	57460.2	58105.7	58621.5	3.68488
				Unknown			-	554.177	553.169	2.65	553.1688@2.65	3771.32	2830.68	1518.5	2311.84	5533.07	2771.77	2620.06	2299.41	2386.73	2194.56	3548.85	1592.71	3623.03	3256.84	2621.76	2873.37	2693.43	2809.45	3425.57	2268.15	3644.73	2473.6	3924.49	2715.95	18.7075
				Unknown			-	559.385	558.377	1.49	558.377@1.49	770.505	1137.09	645.452	1052.47	965.814	1159.7	7607.12	4722.58	3092.07	24657	2977.62	150.149	66969.4	15690.5	38183.1	48934	49674.6	49717	50104.1	52645.1	47019.2	47985.6	47362	47405	3.65598
	M+K	9	524.117	Pentahydroxy-dimethoxyflavone glucoside	C23H24O14	Polyketides	Putative	563.075	562.067	17.12	562.067@17.12	2583.81	2585.36	855.484	1888.29	611.552	3415.36	1949.71	1574.75	1689.2	1388.04	1322.4	56.4952	1081.66	2086.08	690.648	4775.05	4882.23	4876.57	5303.9	5449.87	4835.42	4705.03	4804.39	4828.29	5.18055
	M+K	9	524.117	Pentahydroxy--dimethoxyflavone glucoside	C23H24O14	Polyketides	Putative	563.075	562.067	20.28	562.0671@20.28	1883.2	1834.44	609.7	1336.08	494.049	2174.01	1393.88	1120.06	1102.22	1031.83	1141.25	27.1674	803.019	1495.48	531.559	3204.13	3275.53	3047.99	3275.46	3465.44	3088.61	3081.53	3048.65	3262.67	4.39911
				Unknown			-	563.552	562.544	2.53	562.5439@2.53	21152.5	31117.7	15983.3	29712.8	26160.9	29503.1	23094.5	20461.1	25214.4	22857.7	21742.6	16.8859	20479.7	34094.3	20199.3	27476.5	27581.1	28144.7	29192	30226.4	26145.1	26100	26057.5	26776.4	5.3144
				Unknown			-	565.567	564.559	15.19	564.5594@15.19	1435.19	4637.59	1167.34	12943.9	15798.2	6361.86	4711.83	6394.53	4049	2545.17	20152.4	878.56	33159.6	2715.4	2971.98	21110.6	20808	21186.3	22160.9	23135.8	20522.6	20289.7	20334.8	20432	4.55126
				Unknown			-	577.127	576.119	21.58	576.1193@21.58	10806.1	10467.4	3321.42	6727.32	2794.54	13371	7564.02	5804.98	6404.64	5896.56	6341.34	1151.63	4670.44	8688.32	2710.53	18514.2	18892.9	18917.2	19069.1	20697.8	17809.7	18383.6	18428.1	18611.8	4.24571
				Unknown			-	577.127	576.119	13.81	576.1193@13.81	13896.7	15236.5	5295.11	10062.8	4281.62	20890.1	11390.2	8884.36	9462.81	7216.64	7328.7	259.724	6896.08	11756.7	4034.64	29202.7	29651.8	29713.3	30893	31869.4	27975.8	28339.2	28485	28470.4	4.3992
				Unknown			-	577.127	576.119	22.4	576.1194@22.4	3492.89	3311.11	1052.39	1891.75	615.628	3902.97	2246.82	1762.4	2102.9	1868.01	1854.42	436.92	1402.14	2572.6	919.735	5180.28	5609.85	5452.84	5626.38	6217.28	5332.33	5456.37	5479.54	5389.08	5.28689
				Unknown			-	577.127	576.12	24.33	576.1196@24.33	1668.35	1533.64	521.362	1030.66	441.849	1958.26	1110.11	813	992.811	1165.62	1181.12	351.775	750.243	1391.77	479.406	2529.55	2543.09	2589.76	2711.02	2929.89	2572.49	2416.2	2516.77	2692.81	5.71859
	M+H	2	576.512	Phenolic phthiocerol	C37H68O4	Fatty Acyls	Putative	577.52	576.512	28.41	576.5121@28.41	10645.5	13412.7	8200.08	12639.4	13920.2	14104.5	10322	10123.4	11104.2	10132.6	10526.5	10576.7	11138.7	10189	10009.9	13774.5	12287.6	10835.9	10893	10445.7	12405.9	11390.1	12443.4	11280.4	8.98615
	M+H-H2O	1	594.522	DG(34:1)	C37H70O5	Glycerolipids	Putative
	M+H-H2O	2	596.538	DG(34:0)	C37H72O5	Glycerolipids	Putative	579.536	578.528	18.98	578.5279@18.98	31177	45593.6	36856.3	40322.6	60740.7	52818.4	28298.8	30491.8	45080.8	41081.9	39117.1	3042.81	44101.3	29450.6	37655.5	133596	137332	139461	142516	149250	130509	131875	134660	135840	4.25691
				Unknown			-	580.126	579.118	13.82	579.1177@13.82	1966.45	2305.07	807.158	1489.94	634.592	3071.91	1621.27	1340.2	1421.8	1148.74	1088.83	17.2441	1029.03	1839.22	552.884	4016.74	4166.91	4191.22	4458.43	4589.02	4029.31	3887.51	4068	4095.15	5.35442
				Unknown			-	580.64	579.632	21.3	579.6324@21.3	18559.4	44969.4	20766.3	27753.9	20581.4	5294.87	22149.2	20825.6	24928.7	7930.14	19519.8	122.511	15796.3	11598.7	19994.1	43647.1	44765.9	44805.2	44466.3	47559	42490	42210.6	43487.5	43421.5	3.60742
				Unknown			-	593.158	592.15	13.82	592.1505@13.82	2843.77	3181.48	1087.27	2081.58	1018.34	4159.1	2095.63	1832.51	2002.73	1483.86	1492.54	56.9548	1414.39	2396.74	886.722	5566.58	5467.8	5582.5	5758.3	5899.44	5442.42	5333.53	5824.56	5372.94	3.6316
	M+H	2	596.538	DG(34:0)	C37H72O5	Glycerolipids	Putative	597.546	596.538	18.97	596.5383@18.97	18771.4	28715.9	24499.1	20097.2	32726.3	28958.5	14734	19081.6	24408	23210.6	23981.2	4760.62	22861.1	19821.8	22432.3	74707.2	78333.5	79759.1	80104.1	87100.5	74552.6	75729.5	76869.2	76233.4	5.00731
	M+H-H2O	4	616.398	Phorbol acetate myristate	C36H56O8	Prenol Lipids	Putative	599.392	598.384	1.05	598.3841@1.05	6006.44	4594.45	2455.26	1370.2	1121.22	1172.62	6125.78	4801.75	6466.69	4727.05	4104.98	82.6639	4575.43	7999.58	3380.65	2184.75	2385.37	2424.38	2235.6	2395.27	2210.66	2330.09	2157.36	2126.16	4.96354
				Unknown			-	601.319	600.311	2.08	600.3109@2.08	559.833	1478.28	411.593	512.19	506.953	649.675	590.654	405.251	513.731	401.189	395.367	20.0697	321.853	567.731	220.405	590.707	438.966	610.967	541.549	456.605	586.265	357.033	385.324	477.077	18.8185
	M+H-H2O	1	620.414	Butyl O-hexadecanoyl-neohesperidoside	C32H60O11	Saccharolipids	Putative	603.411	602.403	1.47	602.4033@1.47	865.735	1254.51	632.463	996.226	1093.28	1224.81	6346.13	3916.36	2802.15	21615.3	2680.15	192.773	64206.5	13482	33872.9	44611	44578.7	45448.4	45886.1	48632.6	43842.4	43051.3	43913.1	43378	3.79618
	M+H-H2O	1	622.554	DG(36:1)	C39H74O5	Glycerolipids	Putative	605.551	604.543	29.96	604.5434@29.96	6449.46	7892.23	4633.69	8405.62	8167	8459.52	6908.47	6174.93	6698.98	6815.88	6088.67	6728.53	6626.78	5800.35	6827.42	8625.09	6931.8	7946.4	7470.96	8113.18	7117.76	7473.66	6938.2	7403.82	7.5521
	M+K	1	568.428	Zeaxanthin	C40H56O2	Prenol Lipids	Putative	607.392	606.384	16.02	606.3839@16.02	15899.1	31814.2	13401.5	21552	17199.7	19803.4	17286.7	14395.7	17710.8	11842.1	15201.5	1524.51	14757.4	16433.4	12651.6	20417.6	21573.3	22829.6	22953	23777.3	21102.5	20517.4	21128.4	19910.9	6.12454
	M+H-H2O	8	624.4	PG(25:0)	C31H61O10P	Glycerophospholipids	Putative
	M+H	2	606.462	PA(O-30:0)	C33H67O7P	Glycerophospholipids	Putative	607.471	606.463	16.24	606.4628@16.24	2707.99	3798.55	3604.19	3936.08	4785.98	8029.97	2231.8	2573.41	3254.22	3447.07	2938.53	784.946	3188.64	3638.54	3029.4	8194.4	7597.34	8459.94	8693.34	10662.5	8037.75	9315.53	7817.05	8628.49	10.7933
	M+K	2	568.507	DG(32:0)	C35H68O5	Glycerolipids	Putative
	M+H-H2O	2	624.475	DG(37:7)	C40H64O5	Glycerolipids	Putative
	M+H-H2O	2	624.569	DG(36:0)	C39H76O5	Glycerolipids	Putative	607.567	606.559	20.89	606.5594@20.89	191948	252252	150796	237816	237727	241134	165702	152699	174361	115100	122147	62629.4	192032	178381	187773	217730	223296	206576	219982	227038	220448	220552	225519	212924	2.89631
				Unknown			-	608.671	607.664	22.13	607.6636@22.13	48240.6	123249	55277.7	70590.8	50271.1	16829.6	56765.6	56004	66244	24174.9	50932.5	340.075	38343.4	27704.9	52410.2	116053	118410	117379	117607	124710	111193	112085	113442	115019	3.49136
	M+H	7	609.182	Peonidin rutinoside	C28H33O15	Polyketides	Putative	610.185	609.177	13.82	609.1772@13.82	331446	373273	119785	235448	91933.6	502309	261053	204811	223721	168202	155887	2423.6	156129	277293	89574.7	688923	700097	704952	723437	754047	669517	667928	679570	684106	3.98209
	M+NH4	4	597.146	Polyketides	C26H29O16	Polyketides	Putative	615.182	614.174	13.82	614.1737@13.82	2913.75	3264.33	1172.57	2150	955.26	4391.11	2337.68	1835.08	2035.69	1511.85	1483.02	64.4094	1439.13	2363.71	926.311	5986.62	6026.65	6132.16	6271.95	6420.22	5940.92	5718.17	5920.08	5716.84	3.88308
	M+Na	5	595.408	Jurubine	C33H57NO8	Sterol Lipids	Putative	618.401	617.393	1.89	617.3928@1.89	196.208	432.59	165.654	191.508	176.938	495.423	3060.47	231.365	116.166	190.413	107.843	29.9761	80.6458	206.14	177.35	1084.18	1161.81	1154.75	1226.72	1340.56	1095.3	1089.62	1132.01	1189.98	7.02763
				Unknown			-	628.195	627.188	3.9	627.1875@3.9	8452.3	7741.28	3893.33	6776.4	14360.3	7576.72	5249.54	5987.89	6059.37	5264.71	7260.59	4590.71	7956.18	7708.64	4139.61	7607.3	6547.05	7413.25	8585	6045.38	8905.39	6428.76	10064	6984.32	17.3934
	M+H	2	634.494	PA(O-32:0)	C35H71O7P	Glycerophospholipids	Putative	635.502	634.494	18.98	634.4941@18.98	6097.6	8741.45	7116.55	9307.36	10099.1	11331.4	4861.11	5295.03	8610.37	6905.66	7404.67	1882.08	6052.7	4973.84	6288.85	24738.4	24708.4	24656.5	25826.6	25695	23302.8	21805.8	23471.9	23850	5.22489
	M+K	1	596.538	DG(34:0)	C37H72O5	Glycerolipids	Putative
				Unknown			-	636.702	635.694	22.95	635.6944@22.95	6874.73	18889.4	7840.6	9862.52	7106.9	3931.67	8233.27	8918.6	9804.97	4972.58	7598.95	20.2269	5674.36	4307.54	7948.14	16401.1	16771	16705.8	17102.1	17857.3	16328.2	15941.7	16594.7	16508	3.25132
	M+NH4	2	624.569	DG(36:0)	C39H76O5	Glycerolipids	Putative	642.604	641.596	20.89	641.5964@20.89	16458.6	19500.5	14333.7	29506.2	31615.9	28337	15080.3	12908	17756.3	16563.7	15685	7837.33	19507.8	15937.7	17225.8	78500	84211.8	81020.1	79345.7	86571.6	81627.9	79675.6	81759.3	81827.3	3.07371
				Unknown			-	647.437	646.429	1.46	646.4292@1.46	689.162	990.959	519.364	944.935	893.261	921.661	4744.4	2786.46	2137.33	15805.9	2010.12	120.469	53517.8	9685.99	26643.2	35920.4	36496.1	36127.6	36314.5	39197	35303.4	34363.4	34779.3	34751.7	4.02725
	M+H	7	646.457	PA(32:1)	C35H67O8P	Glycerophospholipids	Putative	647.46	646.452	21.33	646.452@21.33	278547	518344	181045	301823	207739	340821	259386	208509	239882	190090	207010	10882.9	160587	297994	120695	15503.8	16554.6	16111.7	15354.8	16091	16602.9	15771.4	17187.7	16488.3	3.62065
	M+Na	8	624.475	DG(37:7)	C40H64O5	Glycerolipids	Putative
	M+H-H2O	7	664.468	PG(P-29:0)	C35H69O9P	Glycerophospholipids	Putative
	M+H	3	648.512	(ladderane-octanoyl)-(ladderane-octanyl)-sn-glycerol	C43H68O4	Glycerolipids	Putative	649.517	648.509	22.34	648.5094@22.34	13893.9	20190.7	11754.9	20622.6	19315.5	15575.2	16250.4	16735.3	15473.6	17264.8	13342.4	16839.3	15653.6	14381.4	14600.5	14834.9	16171	8628.99	15802.5	13389.5	12608.6	16738.3	11260.5	13248.9	19.0878
	M+H	1	648.509	PA(O-33:0)	C36H73O7P	Glycerophospholipids	Putative
	M+H-H2O	3	666.522	DG(40:7)	C43H70O5	Glycerolipids	Putative
				Unknown			-	651.146	650.138	22.4	650.1378@22.4	5338.56	5096.89	1604.35	3498.48	1278.78	6331.97	3930.23	3079.2	3252.54	2783.8	3108.98	478.376	2162.34	4311.88	1527.57	8861.24	9134.05	9148.17	9467.33	9778.1	8471.12	8417.65	8843.31	8600.68	5.10514
				Unknown			-	651.146	650.138	17.12	650.1379@17.12	12973.1	12720.9	4139.45	8961.17	3150.84	17055.8	9529.81	7484.23	8263.87	6543.1	6406.61	268.887	5701.67	10577.5	3370.61	24726.1	25648	24719.6	25728.3	27055.4	23774.2	24467.3	23735.7	23941.6	4.42196
	M+H	5	652.432	PG(27:0)	C33H65O10P	Glycerophospholipids	Putative	653.442	652.434	6.58	652.434@6.58	4162.89	8715.37	2693	4020.77	3933.98	4700.66	3537.52	3193.49	3745.95	3347.33	3420.4	27.8539	2775.52	3970.5	2466.01	5180.47	5376.57	5395.25	5444.05	5964.89	5065.75	5190.08	5100.34	5407.32	5.08023
				Unknown			-	654.144	653.136	17.12	653.1361@17.12	2459.09	2361.7	786.439	1563.36	616.783	3204.05	1769.45	1470.19	1620.39	1259.26	1236.97	38.0353	1048.92	1932.97	625.868	4482.93	4579.41	4656.6	4572.3	4979.83	4425.5	4352.13	4278.81	4416.38	4.57591
	M+NH4	1	638.548	Trilauroyl-glycerol	C39H74O6	Glycerolipids	Putative	656.583	655.575	20.89	655.575@20.89	62867	90864.7	52333.4	97413.8	87609.5	90888.8	53158.4	58284	109145	73506.5	74591.6	73253.5	67620	66062.1	64528	51852	79754.2	49978.3	53895.7	56637.6	59949.9	61042	51625.3	56107.1	15.5903
	M+H-H2O	7	680.463	PG(29:0)	C35H69O10P	Glycerophospholipids	Putative	663.455	662.447	16.03	662.4467@16.03	667691	1.16725e+06	586319	986268	823603	915573	720166	658148	786224	604576	689563	5180.31	638890	682199	589486	842041	899093	845875	844708	940550	811304	810016	831070	835466	4.97992
				Unknown			-	664.734	663.726	23.87	663.7258@23.87	8260.28	22961.3	9004.96	12147.4	9078.02	6680.78	10006.3	10265.8	11292.8	7820.9	9251.03	88.6044	7134.06	5983.81	9311.8	20715.6	20612.4	21130.2	21526.5	21868.1	20286.2	20421.5	20827.6	20584.6	2.51543
				Unknown			-	667.177	666.169	17.12	666.1693@17.12	2808.47	2551.61	826.883	1847.26	633.526	3456.99	1891.34	1588.02	1734.64	1385.39	1379.27	19.1492	1210.57	2205.05	657.74	4958.15	5107.76	5035.87	5507.47	5339.6	5105.13	4732.22	4777.95	5102.21	4.83093
	M+H	5	668.538	DG(40:6)	C43H72O5	Glycerolipids	Putative	669.549	668.541	2.45	668.5407@2.45	5660.67	11225.2	17117.3	6077.68	9492.23	9550.21	4928.77	10296.1	21321.6	6271.27	10107.5	7.81879	7604.4	7142.59	5728.05	67522.9	70146.1	70735.2	73238.7	76979	65711.8	64421.5	65744.7	65912.2	6.06862
	M+Na	9	646.554	DG(38:3)	C41H74O5	Glycerolipids	Putative
				Unknown			-	675.677	674.669	4.64	674.6692@4.64	3815.73	10028.9	1992.27	9208.36	2583.4	1631.15	6397.75	1512.15	25955.4	1601.79	2218.94	145.924	1450.06	47385.6	1058.09	10901.4	10719.4	11323.4	11538.5	12526.7	10650.8	10593.1	10531.2	10789.4	5.83048
	M+K	7	642.462	PA(P-33:2)	C36H67O7P	Glycerophospholipids	Putative	681.421	680.413	21.33	680.4132@21.33	17664	28873.7	12416	21540.6	16710	23195.7	17226.7	14653.8	16191.6	15139.6	14891.7	1219.57	13414.6	18071.3	10741.4	2501.93	3173.94	3733.83	2959.28	3509.17	3705.03	3217.67	3441.87	3466.25	11.8275
	M+H-H2O	6	700.601	DG(42:4)	C45H80O5	Glycerolipids	Putative	683.602	682.594	23.36	682.5939@23.36	1.63516e+06	2.10474e+06	1.20223e+06	2.22247e+06	2.18752e+06	2.21991e+06	1.66289e+06	1.60433e+06	1.65908e+06	1.79014e+06	1.70161e+06	1.69962e+06	1.69022e+06	1.54383e+06	1.64709e+06	1.72594e+06	1.74268e+06	1.67454e+06	1.66867e+06	1.62314e+06	1.73572e+06	1.73769e+06	1.75372e+06	1.7435e+06	2.63423
				Unknown			-	684.204	683.196	17.12	683.196@17.12	674016	656765	199294	434259	139804	865387	482892	367154	411855	322943	319852	3934.7	273291	524382	160724	1.1557e+06	1.16645e+06	1.16443e+06	1.18153e+06	1.22409e+06	1.12458e+06	1.12062e+06	1.13141e+06	1.1357e+06	2.85651
	M+NH4	1	666.58	TG(38:0)	C41H78O6	Glycerolipids	Putative	684.614	683.607	21.76	683.6066@21.76	67431.5	108854	66052.3	115808	123885	113505	88634.9	82592.8	86967.8	94484.6	89720.5	88373.8	87477.2	59605.2	85874.9	75204.6	73777.5	75396.2	70584.6	93198.5	73851.4	74002.3	75092.7	80297.5	8.64498
				Unknown			-	690.199	689.191	17.12	689.1913@17.12	2478.38	2370.1	772.559	1658.34	534.105	3221.56	1868.08	1386.36	1608.76	1172.83	1214.75	51.7794	1155.6	2056.19	643.184	4802.71	4862.31	4827.19	4869.1	5094.36	4669.88	4764.54	4404.74	4892.55	3.89185
				Unknown			-	698.256	697.248	21.11	697.2482@21.11	50013.9	71105.5	35051.3	62080.9	63365.9	70584.6	60450	51409.8	62321.6	59569	55362.4	47919.5	54857.9	45918.4	59550.4	58970.8	63973.1	50469.7	62184	57202.6	55601	42617.7	44979.9	56220	13.3737
	M+H	6	698.585	DG(42:5)	C45H78O5	Glycerolipids	Putative	699.596	698.588	21.51	698.5885@21.51	126253	169581	80436.5	165678	150741	149324	127199	109763	136699	145240	134521	134193	122512	103839	110106	119995	122014	111225	111904	120759	107583	130546	120810	121396	5.92464
	M+Na	10	676.601	DG(40:2)	C43H80O5	Glycerolipids	Putative
	M+H-H2O	6	716.596	TG(42:3)	C45H80O6	Glycerolipids	Putative
	M+Na	7	678.426	PA(35:6)	C38H63O8P	Glycerophospholipids	Putative	701.41	700.403	16.02	700.4025@16.02	30681.9	60729.6	28172.5	41909.7	35320.5	41145.5	35054.7	26864.8	34802.2	24346.6	29475.7	803.057	26133.8	35074.7	22968.6	40974.5	41925.9	42677	42698.2	44245.5	38879.3	40366.6	40374.1	39602	4.14911
				Unknown			-	702.214	701.207	5.77	701.2066@5.77	7649.6	8418.13	4376.52	7509.1	13823.1	8750.41	4217.87	6764.66	6422.77	5819.65	7600.11	5479.17	7086.45	7855.55	2591.37	8304.76	7644.59	8753.42	9838.93	7116.42	9381.83	7056.02	9513.08	7277.06	13.1902
	M+H	0	704.126	Isorhamnetin (sulfatorutinoside)	C28H32O19S	Polyketides	Putative	705.133	704.125	17.12	704.125@17.12	1627.43	1574.9	476.524	1026.07	239.588	2082.8	1113.52	892.01	1035.44	840.327	823.855	9.55383	711.561	1265.36	395.318	2924.25	3093.21	3066.75	2909.78	3306.88	2927.76	2971.5	2907.34	2860.13	4.64924
	M+H	1	704.536	PA(36:0)	C39H77O8P	Glycerophospholipids	Putative	705.544	704.536	21.77	704.5358@21.77	50356.6	65666.3	38077.2	71162.7	70164.4	77786.1	54069.8	52018.7	53995.5	59737.8	54349.9	55492.7	54003.7	54302.4	52777.9	58617.1	55919.2	54627.5	53793.6	55508.8	53343.9	56582.9	53805	55154.3	2.9917
	M+Na	1	682.554	DG(41:6)	C44H74O5	Glycerolipids	Putative
	M+K	1	666.58	TG(38:0)	C41H78O6	Glycerolipids	Putative
	M+H-H2O	1	722.546	Mannosyl-phosphomycoketide C33	C39H79O9P	Polyketides	Putative
	M+H-H2O	1	722.546	PG(O-33:0)	C39H79O9P	Glycerophospholipids	Putative
	M+H	9	706.479	PG(31:1)	C37H71O10P	Glycerophospholipids	Putative	707.492	706.484	16.02	706.4841@16.02	18899.6	35435.9	15750	27822.2	20813.9	23806.5	20150.8	16261.8	21096.6	14462.2	17534.4	584.447	15794.1	18485.8	13879.8	24336.2	25108.7	24662.1	25775.2	26363.8	24292.4	23876.6	24506.2	24757.8	3.14859
	M+Na	10	684.509	PA(O-36:3)	C39H73O7P	Glycerophospholipids	Putative
	M+NH4	7	689.463	PS(P-30:1)	C36H68NO9P	Glycerophospholipids	Putative
	M+Na	6	685.505	PE(P-33:2)	C38H72NO7P	Glycerophospholipids	Putative	708.49	707.482	1.44	707.482@1.44	508.315	767.341	506.818	732.621	759.548	787.049	3081.69	1766.81	1562.69	9925.1	1537.71	46.2683	38387.6	6220.44	17845.9	25545.4	25830.6	25776.1	26424.3	27664	24794.5	24621	24500.2	24789.8	4.02901
	M+NH4	1	690.455	Butyl O-butanoyl-O-hexadecanoyl-neohesperidoside	C36H66O12	Sterol Lipids	Putative
	M+NH4	1	690.58	TG(40:2)	C43H78O6	Glycerolipids	Putative	708.614	707.607	21.53	707.6066@21.53	21830.1	26419.2	16398.4	29235.8	27967.7	32569.4	19540.1	19924.3	21339.1	22120.8	21858.5	21506.2	22633.3	22259.6	22202.7	20999.4	22343.8	18799.7	17904.6	23598.3	21697.9	16723.2	19457.4	17108.5	12.256
	M+NH4	0	692.596	TG(40:1)	C43H80O6	Glycerolipids	Putative	710.63	709.622	22.04	709.6217@22.04	57870.3	72805.5	42252	72205.8	74777	79389.3	50022.3	55520.3	49646.1	60699	41112.3	40031.4	51374.8	38434.7	57030.4	60927.8	60478.9	33361.4	58208.8	60080.1	44119	49748.2	63267.9	44125.7	19.6108
	M+NH4	1	694.611	TG(40:0)	C43H82O6	Glycerolipids	Putative	712.646	711.638	22.54	711.6378@22.54	37688.5	86560.6	50319.4	50321	77163.8	91414.1	41404.2	55954.8	66173.5	40939.7	59022.5	40282.9	59406.9	65585.5	67119.2	57442.2	34034.7	69411.3	68168	70577.4	62093.2	53125	60374.9	62349.2	18.7606
	M+H-H2O	7	734.525	PA(O-40:6)	C43H75O7P	Glycerophospholipids	Putative	717.527	716.519	2.45	716.5194@2.45	1710.69	2992.52	3964.91	1762.28	2713.52	2536.66	1307.9	2809.33	4882	1797.68	2599.1	131.855	1960.64	1958.11	1586.47	11136.3	11380	11526.2	11781.9	12137.6	10712.6	10862.3	10976.9	11143.4	4.0612
	M+H	9	720.494	PG(32:1)	C38H73O10P	Glycerophospholipids	Putative	721.508	720.5	16.02	720.4997@16.02	22717.3	46573	19718.3	30938.1	25241.3	26365.3	23599.8	19567.1	24723.3	17008.6	23081	785.408	21120.2	22467.7	18895	28415	29796	30844.2	30237.5	33484.5	28358	28305.6	30029.4	28201.5	5.78297
	M+Na	10	698.525	PA(P-37:2)	C40H75O7P	Glycerophospholipids	Putative
	M+NH4	7	703.479	PS(P-31:1)	C37H70NO9P	Glycerophospholipids	Putative
	M+H-H2O	7	738.556	PA(O-40:4)	C43H79O7P	Glycerophospholipids	Putative	721.558	720.55	23.36	720.5501@23.36	372699	519588	283523	530839	518522	543145	396212	394147	400233	405963	413148	417258	403183	373162	401412	411619	428224	410669	399719	419005	381423	408210	403785	399277	3.26042
	M+Na	6	702.18	Hexaacetylpyracanthoside	C33H34O17	Polyketides	Putative	725.164	724.157	20.28	724.1565@20.28	9143.24	9178.95	3046.17	6056.1	1745.08	11805.2	7087.42	4822.14	5706.82	4276.4	4253.28	254.651	4269.95	7385.31	2254.25	16465.2	16448.2	17042.4	17483.6	17572.2	15768.9	16074	16284.7	16614.8	3.69003
	M+H-H2O	9	742.174	Quercetin L-arabinopyranosyl-(1->6)-(p-coumaroylglucoside)	C35H34O18	Polyketides	Putative
	M+H	5	724.601	DG(44:6)	C47H80O5	Glycerolipids	Putative	725.611	724.604	3.35	724.6035@3.35	31932	82506.2	19618.4	30199.5	27079.5	55021.1	30274.4	21861.4	34406.7	33638.6	17720.4	15.9782	28093.5	32986.4	29395.6	89122.9	91984.8	92865.6	95250.6	102755	85646.6	85584.3	86810.7	87247.9	6.19908
	M+Na	8	702.616	DG(42:3)	C45H82O5	Glycerolipids	Putative
	M+H-H2O	5	742.611	TG(44:4)	C47H82O6	Glycerolipids	Putative
	M+H	0	730.551	PA(38:1)	C41H79O8P	Glycerophospholipids	Putative	731.559	730.551	22.03	730.5509@22.03	25382.7	34293.9	19575.1	36308	35788.3	36445.2	29142.5	26635.6	26467.3	23797	28505.8	26238.9	26409.5	24437.1	27144.5	28893.3	27560.1	26174	27844.5	27940.7	27145.7	25500.8	27505	28593.3	3.93053
	M+K	0	692.596	TG(40:1)	C43H80O6	Glycerolipids	Putative
	M+H-H2O	0	748.562	PG(P-35:0)	C41H81O9P	Glycerophospholipids	Putative
	M+H	0	732.567	PA(38:0)	C41H81O8P	Glycerophospholipids	Putative	733.574	732.566	22.51	732.5662@22.51	33799.6	46476.9	25550.7	39471.5	45710.9	47792.5	35864.4	33852.1	36120.9	38205.6	36471.5	35951.2	37496.5	34972.1	34608.2	36121.2	37929.7	36009.7	34005.7	36576.1	31904.9	33046.4	24641.1	35407.5	11.6616
	M+Na	0	710.585	DG(43:6)	C46H78O5	Glycerolipids	Putative
	M+H-H2O	0	750.577	PG(O-35:0)	C41H83O9P	Glycerophospholipids	Putative
	M+H	7	735.541	PS(O-33:0)	C39H78NO9P	Glycerophospholipids	Putative	736.543	735.536	16.02	735.5356@16.02	4405.59	8615.34	3718.75	6263.92	4855.18	5480.41	4943.63	3908.04	5151.43	3528.54	4214.91	225.308	3945.31	4563.26	3574.09	6032.67	6074.21	5399.42	5803.33	6040.58	6036.32	5659.13	5842.8	5398.72	4.65611
	M+NH4	7	718.515	PG(O-33:2)	C39H75O9P	Glycerophospholipids	Putative
	M+H	6	736.541	PA(O-40:5)	C43H77O7P	Glycerophospholipids	Putative	737.552	736.544	21.52	736.5443@21.52	35689.9	43671	27353.8	48291.7	47060.3	48328.9	22671	33006.2	33718.9	23334.3	36028.9	36660.1	35365.5	34030.8	30072.5	35503	39039.3	36674.5	33350.9	36980.2	25751.6	30809.7	36283.4	37014.2	11.8007
	M+Na	6	714.568	PE-Cer(d38:2)	C40H79N2O6P	Sphingolipids	Putative
	M+Na	10	714.556	Glycerophospholipids	C41H79O7P	Glycerophospholipids	Putative
	M+H-H2O	5	754.551	PA(40:3)	C43H79O8P	Glycerophospholipids	Putative
	M+H-H2O	5	754.559	MGDG(34:2)	C43H78O10	Glycerolipids	Putative
	M+H	6	736.541	PA(O-40:5)	C43H77O7P	Glycerophospholipids	Putative	737.552	736.544	23.36	736.5445@23.36	57769.2	71531	42927.3	70112.1	74910.9	78925.7	57633.5	52167.4	57407.1	54076.3	58934.5	54485.5	58601.3	51698	57731.7	55661.6	61456.7	59979.4	59475.9	60980.6	52518.3	47242.5	59026.5	53906.2	8.38146
	M+Na	6	714.568	PE-Cer(d38:2)	C40H79N2O6P	Sphingolipids	Putative
	M+Na	10	714.556	Glycerophospholipids	C41H79O7P	Glycerophospholipids	Putative
	M+K	6	698.585	DG(42:5)	C45H78O5	Glycerolipids	Putative
	M+H-H2O	6	754.551	PA(40:3)	C43H79O8P	Glycerophospholipids	Putative
	M+H-H2O	5	754.559	MGDG(34:2)	C43H78O10	Glycerolipids	Putative
	M+NH4	1	720.627	TG(42:1)	C45H84O6	Glycerolipids	Putative	738.661	737.653	22.75	737.6532@22.75	35702.8	51942	29959.1	54020.6	53477.3	56015.5	42339.4	41166.9	41420.3	44331.1	41558.4	42106.4	39955.3	28840.9	39482.8	42522.5	43646.1	42782.2	38290.5	41974	44117.8	42979.8	41733.7	44420.2	4.28376
	M+NH4	1	722.642	TG(42:0)	C45H86O6	Glycerolipids	Putative	740.677	739.669	23.35	739.6692@23.35	95401.8	126539	70631.3	137539	143707	138547	93852.9	97949.8	91245.4	100787	93796.4	105577	105171	99768.9	103818	96127.5	100807	94193.6	94850.6	96836	101863	96667.6	99921.2	93672.1	3.05848
	M+H	9	740.195	Polyketides	C36H36O17	Polyketides	Putative	741.196	740.188	20.28	740.1883@20.28	811648	806271	255534	544584	172131	1.00213e+06	605540	465312	530083	375421	386193	7849.85	312787	611025	172727	1.16697e+06	1.18433e+06	1.18152e+06	1.19396e+06	1.2228e+06	1.15312e+06	1.15594e+06	1.16952e+06	1.17072e+06	1.81761
	M+H	7	749.521	PS(33:0)	C39H76NO10P	Glycerophospholipids	Putative	750.523	749.515	16.02	749.515@16.02	7371.92	14832.1	6373.99	9525.53	8870.4	9280.23	7626.46	6848.43	7597.73	5490.47	7127.48	466.569	6537.64	8010.66	5660.52	9041.76	9761.77	9373.44	10228.8	11655.9	8577.57	9127.54	8925.62	8972.79	9.87513
	M+K	7	711.565	GlcCer(d35:2)	C41H77NO8	Sphingolipids	Putative
	M+NH4	7	732.494	PG(33:1)	C39H73O10P	Glycerophospholipids	Putative
	M+H	9	751.515	Glycerophospholipids	C42H74NO8P	Glycerophospholipids	Putative	752.516	751.508	1.41	751.5077@1.41	271.445	473.245	330.916	411.37	552.729	603.212	1740.69	1113.39	796.992	5302.96	842.984	8.84333	24492.1	3436.25	10830.7	16869.8	16670.8	16712.6	16713.5	17753.2	16259.9	15953.7	15930	16170.6	3.43272
	M+NH4	9	734.489	PA(39:6)	C42H71O8P	Glycerophospholipids	Putative
	M+H-H2O	9	769.526	PS(O-36:4)	C42H76NO9P	Glycerophospholipids	Putative
	M+H	9	756.575	MGDG(34:1)	C43H80O10	Glycerolipids	Putative	757.575	756.567	22.27	756.5674@22.27	7361.35	10034.4	3405.93	10384.4	8499.93	9905.51	6979.59	7547.95	7662.79	7790.11	8369.69	8242.24	6851.68	7157.27	7089.03	8074.09	8372.52	7493.53	6636.26	8312.12	6423.86	5643.93	5329.54	6061.43	16.8729
	M+H	1	756.567	PA(40:2)	C43H81O8P	Glycerophospholipids	Putative
	M+K	1	718.611	TG(42:2)	C45H82O6	Glycerolipids	Putative
	M+H-H2O	1	774.577	Glycerophospholipids	C43H83O9P	Glycerophospholipids	Putative
	M+H	4	757.219	Polyketides	C33H41O20	Polyketides	Putative	758.223	757.215	20.28	757.2151@20.28	760034	750034	226647	495629	125610	946792	559878	426684	492647	393372	402827	10710.1	311238	609396	172345	1.10506e+06	1.12112e+06	1.11515e+06	1.12845e+06	1.15241e+06	1.08587e+06	1.08997e+06	1.10313e+06	1.10702e+06	1.83098
	M+NH4	8	740.195	Polyketides	C36H36O17	Polyketides	Putative
	M+K	3	720.263	Prenol Lipids	C35H44O16	Prenol Lipids	Putative	759.224	758.216	20.28	758.2157@20.28	448811	427302	124094	277207	68846.7	553562	321665	241917	280257	219496	227813	5686.24	175916	355518	96672.3	685717	696825	695602	701521	718916	673548	677785	684523	686758	1.98858
	M+NH4	3	741.188	Malonylmalvin	C32H37O20	Polyketides	Putative
	M+H	0	758.583	PA(40:1)	C43H83O8P	Glycerophospholipids	Putative	759.59	758.582	22.75	758.5821@22.75	19124.2	28858.2	14045	24275.6	27785.6	27117.5	20374.7	17164.7	19786	20213.3	20446.5	20071	19962.8	18223.8	21199.9	21728.3	21182.6	19289.3	21866.7	20920.9	18935.2	19972.5	18297.3	23184	7.7113
	M+K	0	720.627	TG(42:1)	C45H84O6	Glycerolipids	Putative
	M+H-H2O	0	776.593	Glycerophospholipids	C43H85O9P	Glycerophospholipids	Putative
	M+H	1	760.598	PA(40:0)	C43H85O8P	Glycerophospholipids	Putative	761.606	760.598	23.21	760.5982@23.21	24395.4	33781.5	21737.5	41217.7	40968.2	40748.4	26136.7	30329.7	31963.1	29334.1	31577.5	32093.9	31514.7	29629.3	29885.1	33774.7	32867.7	31797.1	32735.9	32685.6	30709.4	33093.4	25903.9	23183.2	11.9849
	M+K	1	722.642	TG(42:0)	C45H86O6	Glycerolipids	Putative
	M+H-H2O	8	778.603	Prenol Lipids	C50H83O4P	Prenol Lipids	Putative
	M+H-H2O	1	778.609	PG(O-37:0)	C43H87O9P	Glycerophospholipids	Putative
	M+Na	6	741.224	Polyketides	C33H41O19	Polyketides	Putative	764.218	763.21	20.28	763.2101@20.28	5084.73	4623.23	1437.85	2647.18	1082.97	5262.42	3512.58	2685.05	2945.07	1970.26	2230.69	191.102	2080.1	3728.29	1290.09	8470.89	8626.28	8527.58	8522.72	9163.97	8070	8170.6	8416.75	8367.09	3.66708
	M+H	6	763.536	PS(34:0)	C40H78NO10P	Glycerophospholipids	Putative	764.539	763.531	16.02	763.531@16.02	2279.56	4180.85	1770.19	2987.9	2681.28	2433.55	2038.5	1953.25	2055.46	1796.7	2155.6	57.0739	1995.49	2324.35	1815.95	2602.17	2675.38	2919.63	2974.23	3276.45	2491.3	2364.43	2582.53	2675.35	10.2737
	M+K	7	725.581	GlcCer(d36:2)	C42H79NO8	Sphingolipids	Putative
	M+K	5	725.572	Tetradecanyl-(ladderane-octanyl)-sn-glycerophosphocholine	C42H80NO6P	Glycerophospholipids	Putative
	M+NH4	6	746.51	Glycerophospholipids	C40H75O10P	Glycerophospholipids	Putative
	M+H-H2O	6	781.547	PI-Cer(d34:0)	C40H80NO11P	Sphingolipids	Putative
	M+H	0	767.628	Sphingolipids	C45H85NO8	Sphingolipids	Putative	768.635	767.627	3.35	767.6267@3.35	9129.47	18834	5622.65	9086.27	8542.61	14790.1	8037.96	6831.69	9655.42	9589.04	5538.6	24.3289	8110.11	9175.6	8575.27	17169.5	17231	16899.9	17091.4	18276.4	16724.2	16602.5	16797.7	16625.7	3.02374
	M+H-H2O	0	785.638	Dioctadecanoyl-O-(deoxy-amino-alpha-D-glucosyl)-sn-glycerol	C45H87NO9	Glycerolipids	Putative
	M+NH4	1	750.674	TG(44:0)	C47H90O6	Glycerolipids	Putative	768.708	767.701	24.07	767.7006@24.07	76701.9	96401.1	60722.2	114911	101015	113883	86702.8	72542.3	78560.9	90866.3	76242.6	84724.9	75898.9	72944.6	75462.6	83097	91073.3	73202	68895.6	87276.9	83738.5	89466.5	80649.4	83338.1	8.82509
				Unknown			-	772.275	771.267	22.09	771.2668@22.09	32452.6	39840.4	21232.6	42095.7	41964.7	44670.5	31645.3	30530	31701.7	34743.1	33748.4	33806.1	32555.2	30877.7	29445.7	33247.8	34022.8	33711	33883.2	31747.2	31975.1	33477.8	34303.1	33589.9	2.66582
	M+H	1	772.598	PA(411:0)	C44H85O8P	Glycerophospholipids	Putative	773.606	772.598	23.08	772.5985@23.08	9113.37	14145.8	7377.89	14086.3	13761.6	13324	10133.7	10568.7	11588	9837.72	9702.46	9661.64	10146.4	10321.8	9360.99	11890.2	10285.1	10043.3	11298.7	12496.2	9362.47	9224.31	9521.17	10244	11.0574
	M+K	1	734.642	TG(43:1)	C46H86O6	Glycerolipids	Putative
	M+H-H2O	1	790.609	Glycerophospholipids	C44H87O9P	Glycerophospholipids	Putative
	M+H-H2O	2	790.611	TG(48:8)	C51H82O6	Glycerolipids	Putative
	M+H	1	774.614	PA(41:0)	C44H87O8P	Glycerophospholipids	Putative	775.622	774.614	23.59	774.6139@23.59	13601.8	17632.6	10967.2	20685.8	18023.4	17196.6	15667.5	12854.2	15693.1	16907.3	15136.2	13299.1	15511.9	12905	12511.5	14288	14995.3	14513.7	13198.6	15943.1	14339	15067.8	13628.1	16426.3	7.0005
	M+K	1	736.658	TG(43:0)	C46H88O6	Glycerolipids	Putative
	M+H-H2O	1	792.624	PG(O-38:0)	C44H89O9P	Glycerophospholipids	Putative
	M+H-H2O	2	792.627	TG(48:7)	C51H84O6	Glycerolipids	Putative
				Unknown			-	776.233	775.225	8.29	775.225@8.29	5636.44	8743.33	4403.04	7167.73	10962.5	8643.16	3401.65	6666.42	5916.49	5487.48	6019.21	5280.83	5118.19	6404.83	1768.33	7444.24	7094.94	8869.92	9221.76	7084.83	7705.43	6391.64	7808.63	6347.13	13.1178
	M+Na	9	756.169	Quercetin-(di-coumarylglucoside)	C39H32O16	Polyketides	Putative	779.151	778.144	20.28	778.1436@20.28	4028.23	3526.48	1174.23	2475.93	864.701	4565.6	2631.63	2058.78	2442.14	1872.83	1885.34	117.594	1745.32	2944.81	976.731	6670.97	6678.93	6685.81	6628.05	7069.37	6428.67	6629.03	6451.63	6838.75	2.88809
	M+K	9	740.195	Polyketides	C36H36O17	Polyketides	Putative
	M+K	8	741.612	GlcCer(d37:1)	C43H83NO8	Sphingolipids	Putative	780.569	779.561	16.02	779.5611@16.02	4130.73	6926.75	3366.22	5272.18	3799.94	4484.85	3861.35	3118.93	4002.5	2740.84	3162.49	471.553	2971.99	3543.48	2735.91	4585.06	4919.85	5032.01	4978.08	5280.18	4608.1	5029.84	5027.1	4501.1	5.33294
	M+NH4	8	762.541	PG(35:1)	C41H79O10P	Glycerophospholipids	Putative
	M+NH4	1	762.674	TG(45:1)	C48H90O6	Glycerolipids	Putative	780.708	779.701	23.97	779.7006@23.97	59651	69719.2	41267	75572.3	72438.7	74443.6	62329.4	54579.4	59296	59508.2	55184.7	59894.2	59965.9	52123.2	61318.8	62780	59287.3	62366.8	44886.3	45571.1	59585.6	62858.4	56737	45596.2	14.1852
	M+NH4	1	764.689	TG(45:0)	C48H92O6	Glycerolipids	MS/MS	782.724	781.716	24.53	781.7161@24.53	59093.7	76079.6	42320.7	80669.3	78753.8	78132.8	67548	61880.3	61672.4	64346.4	64931.5	58867.9	59935.1	55814.2	57330.8	65354	62475.8	65842.2	47955.4	61041.7	59847.1	64733.8	66821.5	69675.9	10.0179
	M+H	6	784.221	Isoswertisin-O-feruloyl-O-glucoside	C38H40O18	Polyketides	Putative	785.233	784.226	20.28	784.2256@20.28	6999.82	6715.13	1977.91	5245.67	1826.86	8315.56	4878.6	3217.73	4232.34	3301.53	3339.03	266.574	3048.82	5385.5	1916.4	11872.3	11659.8	12004.9	11275.3	11813.3	11544.1	11323.7	12379.2	11746.8	2.91417
	M+H	1	784.598	PA(42:2)	C45H85O8P	Glycerophospholipids	Putative	785.606	784.598	23.03	784.5985@23.03	13690.1	19481.3	9371.96	18658.2	18243.5	18280	14298.4	13191.9	14013	14723.9	10716.8	14026.3	14553.9	12524.9	13483.2	12361.7	15157.2	13820.3	13396.2	14392	12985.6	14160.6	13876.3	14401.3	6.03031
	M+K	1	746.642	TG(44:2)	C47H86O6	Glycerolipids	Putative
	M+H-H2O	1	802.609	PG(P-39:1)	C45H87O9P	Glycerophospholipids	Putative
	M+H	1	786.614	PA(42:1)	C45H87O8P	Glycerophospholipids	Putative	787.622	786.614	23.52	786.614@23.52	30759.4	44439	25172.1	46684.7	49968.3	45670.2	38672.6	33942.9	34446.6	33857.7	38309.1	36128.8	35363.7	32712.9	33288.4	39325.9	36811	39178.3	37790.8	35534.1	33242.6	34678.8	38723.1	35696.7	5.82297
	M+K	1	748.658	TG(44:1)	C47H88O6	Glycerolipids	Putative
	M+H-H2O	1	804.624	Glycerophospholipids	C45H89O9P	Glycerophospholipids	Putative
	M+H-H2O	2	804.627	TG(49:8)	C52H84O6	Glycerolipids	Putative
	M+H	1	788.63	PA(42:0)	C45H89O8P	Glycerophospholipids	Putative	789.638	788.63	24.08	788.6297@24.08	45111.8	59251.8	36536.5	59483	66540.6	61305.2	52108.2	45921.3	52366.4	49383.5	46549.7	47263.9	44438.3	43435.5	44289.2	47761	49644.9	52327.3	52118.6	54993.6	43135.4	45240.1	51887.3	46273.8	7.93783
	M+K	1	750.674	TG(44:0)	C47H90O6	Glycerolipids	Putative
	M+H-H2O	1	806.64	PG(O-39:0)	C45H91O9P	Glycerophospholipids	Putative
	M+H-H2O	2	806.642	TG(49:7)	C52H86O6	Glycerolipids	Putative
	M+H	6	789.552	PS(36:1)	C42H80NO10P	Glycerophospholipids	Putative	790.555	789.547	16.02	789.5469@16.02	3368.67	6704.32	2947.1	4421.08	4162.34	4184.79	3350.03	3063.05	3523.25	2516.65	3283	235.691	2750.63	3511.32	2673.16	4438.32	4245.77	4464.26	4618.86	5105.79	3819.42	3950.47	4053.28	3988.32	9.41859
	M+K	6	751.596	Sphingolipids	C44H81NO8	Sphingolipids	Putative
	M+NH4	6	772.525	PG(36:3)	C42H77O10P	Glycerophospholipids	Putative
	M+H-H2O	6	807.553	Sphingolipids	C42H81NO11S	Sphingolipids	Putative
	M+Na	7	768.515	PI(O-30:0)	C39H77O12P	Glycerophospholipids	Putative	791.499	790.491	16.02	790.4915@16.02	16195.3	32928	13841.4	21397.4	17918.4	20188.3	17525.5	14953.4	19263	12375.8	15538.5	277.025	13542.9	16425.9	11878.4	21548.9	21284.5	21634	22618.7	23881	21739	20846.7	21058.7	22431.2	4.3147
	M+K	1	752.536	PA(40:4)	C43H77O8P	Glycerophospholipids	Putative
	M+H-H2O	9	808.51	PI(32:1)	C41H77O13P	Glycerophospholipids	Putative
	M+NH4	1	774.674	TG(46:2)	C49H90O6	Glycerolipids	Putative	792.708	791.701	23.91	791.7006@23.91	64517.2	80325.8	50175.5	90961.7	91743.5	91500.6	65278.8	61775.7	66041.2	74106.4	70480.7	68809.1	64347.9	62928.4	60392.4	54575.5	65159.7	56326.1	68220.9	56675.3	74414.2	68647.3	59266	71269.2	11.4252
	M+NH4	2	776.689	TG(46:1)	C49H92O6	Glycerolipids	MS/MS	794.725	793.717	24.46	793.7169@24.46	130465	168076	102917	178257	174751	174207	144556	123924	145456	158033	129820	144588	134861	122139	139075	141297	152597	133399	130521	145683	145852	132088	144800	125862	6.42367
	M+H	4	795.736	TG(42:1)	C50H89D5O6	Glycerolipids	Putative	796.74	795.732	25.1	795.732@25.1	124353	159553	92448.4	184475	166119	168641	131757	132722	125978	133918	127963	126633	127079	118601	122581	138397	136952	132961	127616	132315	133954	133885	148862	138639	4.3577
	M+NH4	1	778.705	Glycerolipids	C49H94O6	Glycerolipids	Putative
				Unknown			-	799.249	798.241	20.28	798.241@20.28	2776.39	2658.71	859.286	1926.47	519.776	3338.4	1995.61	1403.08	1670.34	1321.91	1507.76	43.6173	1113.24	1995.04	690.264	3988.92	3906.85	4189.12	4462.69	4757.08	4084.5	4061.29	4212.05	4168.57	6.20114
	M+H	2	798.674	TG(48:4)	C51H90O6	Glycerolipids	Putative	799.68	798.672	24.47	798.6719@24.47	38940.1	47958.7	29923.3	51331.6	56024.6	53580.9	40665.2	35964.1	41277.4	45350.4	40200.8	39676.3	36799.3	37369	38301.4	41508.6	41650.3	40048.6	39070.2	41266.4	37761.5	36914	38773.1	40693	4.30285
	M+Na	2	776.689	TG(46:1)	C49H92O6	Glycerolipids	Putative
	M+NH4	4	781.643	Sphingolipids	C46H87NO8	Sphingolipids	Putative
	M+NH4	0	782.591	MGDG(36:2)	C45H82O10	Glycerolipids	Putative	800.624	799.617	2.45	799.6166@2.45	1132.81	2075.04	3083.93	1168.73	1798.24	1856.23	906.022	1911.95	3820.39	1106.65	1778.29	8.0474	1338.36	1314.47	1089.17	10438.3	10693	10938.2	10681.4	11481	10132.4	10368.4	10366.1	10206.2	3.96875
	M+H-H2O	10	817.62	Glycerophospholipids	C45H88NO9P	Glycerophospholipids	Putative
	M+H	1	800.63	PA(43:1)	C46H89O8P	Glycerophospholipids	Putative	801.638	800.63	23.96	800.6297@23.96	33175.8	48136.6	28075.2	48070.3	45140.6	39314.8	37566.7	36028.9	34730.1	38754.6	37903.4	38247.2	35928.7	35526.2	34589.3	38214.6	37932.6	37462.3	36267.8	38391.9	34472.9	35827.3	37057.6	38063.9	3.55206
	M+K	1	762.674	TG(45:1)	C48H90O6	Glycerolipids	Putative
	M+H-H2O	1	818.64	Glycerophospholipids	C46H91O9P	Glycerophospholipids	Putative
	M+H-H2O	2	818.642	TG(50:8)	C53H86O6	Glycerolipids	Putative
	M+H	2	800.689	TG(48:3)	C51H92O6	Glycerolipids	Putative	801.695	800.687	25.1	800.687@25.1	32489.4	43373.3	24326.8	45697.7	43467.9	45533.2	38134.6	36063.1	34581.5	35698	32391.5	36239.1	37109.4	32298.4	32847.4	35246	37519.5	33526.5	36893.6	34427.5	33121.4	34360.3	33836	36345	4.46667
	M+Na	1	778.705	TG(46:0)	C49H94O6	Glycerolipids	Putative
	M+NH4	3	783.659	Sphingolipids	C46H89NO8	sphingolipids	Putative
	M+H	1	802.645	PA(43:0)	C46H91O8P	Glycerophospholipids	Putative	803.653	802.645	24.53	802.6453@24.53	36542.6	47157.7	27322.3	47431	46818.2	48181.5	41828.5	35060.1	41225.5	43747.9	37235.9	40024	41864.9	34872.2	35222.6	43989.1	38207.2	39003.8	37301.5	38120	39775.3	36104.9	36052.3	38031.4	6.20128
	M+K	1	764.689	TG(45:0)	C48H92O6	Glycerolipids	Putative
	M+H-H2O	1	820.656	PG(O-40:0)	C46H93O9P	Glycerophospholipids	Putative
	M+H-H2O	2	820.658	TG(50:7)	C53H88O6	Glycerolipids	Putative
	M+NH4	1	788.689	TG(47:2)	C50H92O6	Glycerolipids	Putative	806.724	805.716	24.39	805.7163@24.39	55474.2	74416.5	42552.8	73201.6	72511.5	77241.1	55939.7	56531.2	53504.6	64138.2	56243.2	60228.3	55057.1	54364.5	57433	61610.7	54386.8	58113.7	57631.8	51483.2	60841.1	59317.4	60342.8	46720.4	8.73623
	M+NH4	2	790.705	TG(47:1)	C50H94O6	Glycerolipids	MS/MS	808.74	807.732	24.98	807.7322@24.98	105389	144635	74836.3	139903	129228	138470	108751	104387	113190	122605	105457	103768	106027	101113	111607	117036	119979	111314	105956	117570	105775	108343	115560	113977	4.64209
	M+H	4	809.752	TG(48:1)	C51H91D5O6	Glycerolipids	Putative	810.755	809.747	25.64	809.7475@25.64	78339.6	102649	66644.3	112804	109756	107159	83544.8	80518.9	90496.4	89020.5	91281.6	83844.3	91965.5	75793.3	82385.5	83179.7	91772.3	78870.1	85673.6	80390.1	85629.2	84528.2	85152	84494.4	4.31687
	M+NH4	1	792.721	TG(47:0)	C50H96O6	Glycerolipids	Putative
	M+H	1	812.63	PA(44:2)	C47H89O8P	Glycerophospholipids	Putative	813.638	812.63	23.91	812.6297@23.91	39704.8	56687.8	30466.6	57611.8	52871	57771.8	39251.1	40716.4	39113.3	38328.2	45401.1	36842.5	43210.3	36950.2	42988.2	46065.9	44735.3	46605.5	44873.2	43169.4	42737	41680.8	43420.2	46852.9	4.10088
	M+K	1	774.674	TG(46:2)	C49H90O6	Glycerolipids	Putative
	M+H-H2O	2	830.642	TG(51:9)	C54H86O6	Glycerolipids	Putative
				Unknown			-	815.215	814.207	21.58	814.2068@21.58	719129	780618	285709	587923	208743	922031	584262	490953	545718	460349	475317	68923.6	389324	623246	241610	919725	933898	926669	939493	950922	915665	913010	925533	918527	1.33595
	M+H	2	814.645	PA(44:1)	C47H91O8P	Glycerophospholipids	Putative	815.654	814.646	24.46	814.6462@24.46	82237.2	110096	61827.8	113823	121205	114963	87664.5	82299	85906.1	99982.2	85906.3	87732.6	86868.5	77861.2	90637.5	89177.3	90951.5	87062	92949.8	88039.4	80162.7	82534.1	85121.6	96367.6	5.75067
	M+K	2	776.689	TG(46:1)	C49H92O6	Glycerolipids	Putative
	M+H-H2O	2	832.656	PG(P-41:0)	C47H93O9P	Glycerophospholipids	Putative
	M+H-H2O	1	832.658	TG(51:8)	C54H88O6	Glycerolipids	Putative
	M+H	3	814.705	TG(49:3)	C52H94O6	Glycerolipids	Putative	815.71	814.702	25.69	814.7022@25.69	22441.5	32865.8	15119.8	29013.7	29767.6	28426.1	25118	22045.5	24846.9	25511.5	23329.3	25269.9	21317.2	22449.1	25133.2	22606.8	22475.5	20447.1	23848	22477.8	21311.3	22278.2	20917.5	20336.8	5.35326
	M+Na	0	792.721	TG(47:0)	C50H96O6	Glycerolipids	MS/MS
	M+NH4	2	797.674	Sphingolipids	C47H91NO8	sphingolipids	Putative
	M+H	1	816.661	PA(44:0)	C47H93O8P	Glycerophospholipids	Putative	817.669	816.661	25.1	816.6608@25.1	75699.3	113747	62891	105530	101786	114739	79141.2	75567.1	77736.5	79179.6	77989.9	82333.9	68509.4	73019.9	75269.9	81603.7	93662.5	90880.9	79931.3	80356.2	83104.3	88304.4	68976.6	80862.9	8.75775
	M+K	1	778.705	TG(46:0)	C49H94O6	Glycerolipids	Putative
	M+H-H2O	1	834.671	PG(O-41:0)	C47H95O9P	Glycerophospholipids	Putative
	M+H-H2O	2	834.674	TG(51:7)	C54H90O6	Glycerolipids	Putative
	M+Na	2	795.736	TG(47:1)	C50H89D5O6	Glycerolipids	Putative	818.724	817.716	24.29	817.716@24.29	36491.8	46844.8	27888.2	52189.4	49503.3	44356.1	39120	33167.9	34382.5	39608.1	33949.8	34521.1	37600.3	36015.3	38355.6	37807.1	38154.9	32713.7	30558.2	36212	37760.9	37630.5	38046.6	34429.8	7.66948
	M+NH4	1	800.689	TG(48:3)	C51H92O6	Glycerolipids	Putative
	M+NH4	2	802.705	TG(48:2)	C51H94O6	Glycerolipids	Putative	820.74	819.732	24.91	819.7325@24.91	138188	177886	101941	187971	182221	187277	144046	123170	141527	150826	140533	127998	137684	132870	135718	154267	152090	132975	142448	143080	142989	142618	145334	151510	4.50476
	M+NH4	1	804.721	TG(48:1)	C51H96O6	Glycerolipids	Putative	822.756	821.748	25.51	821.7478@25.51	208008	271604	156161	290756	277028	286421	219510	218095	214227	227059	217786	218323	217357	202827	222172	223658	221918	212343	204214	212075	226571	235204	226881	225161	4.32106
	M+NH4	2	806.736	TG(48:0)	C51H98O6	Glycerolipids	Putative	824.771	823.764	26.35	823.7635@26.35	169314	218799	131123	242352	222896	237282	178773	162552	175230	186332	175254	169853	170940	162491	167110	190431	188296	179153	176648	180073	191987	187774	192057	190833	3.24311
	M+Na	4	802.645	PA(43:0)	C46H91O8P	Glycerophospholipids	Putative	825.638	824.63	23.82	824.6299@23.82	6402.8	11461.1	5479.19	12419.9	10152.2	9929.05	7422.71	7158.06	8771.86	9415.16	8022.72	7568.85	7206.98	7237.61	6659.84	7366.14	7952.62	7534.17	8629.69	8387.41	7612.2	6552.55	5852.48	7698.48	11.485
	M+K	1	786.674	TG(47:3)	C50H90O6	Glycerolipids	Putative
	M+H-H2O	1	842.64	PG(P-42:2)	C48H91O9P	Glycerophospholipids	Putative
	M+H-H2O	2	842.642	TG(52:10)	C55H86O6	Glycerolipids	Putative
	M+H	1	824.689	TG(50:5)	C53H92O6	Glycerolipids	Putative	825.696	824.688	24.91	824.6878@24.91	39780.7	52280.4	29722	51810.1	50921.5	55760	40653.5	40138.4	41080.2	43853.1	41681.4	40483.5	39819.9	38874.1	41293.9	44582.4	44130.2	39313.4	42082.7	41843.6	41350.1	40487.7	40077.8	41732.3	4.17546
	M+Na	2	802.705	TG(48:2)	C51H94O6	Glycerolipids	MS/MS
	M+H-H2O	1	842.7	Sphingolipids	C53H94O7	sphingolipids	Putative
	M+K	1	788.689	TG(47:2)	C50H92O6	Glycerolipids	Putative	827.654	826.646	24.39	826.6457@24.39	39710.4	43913.1	30558	51708.5	47476.8	56723.6	40325.9	32323.9	39370.6	43493.3	41517.1	39889.4	37734.4	38742.5	32815.5	41468.6	41638.7	40679.6	31953.9	41035.9	37919.8	32444.7	38738	40573.4	9.80873
	M+H-H2O	1	844.656	PG(O-42:2)	C48H93O9P	Glycerophospholipids	Putative
	M+H-H2O	2	844.658	TG(52:9)	C55H88O6	Glycerolipids	Putative
	M+Na	5	806.677	PG	C46H95O8P	Glycerophospholipids	Putative	829.669	828.662	24.98	828.6616@24.98	66863.9	88723.5	54060.9	97216.4	89429.5	97668.6	62339.4	65699.2	70849.6	61739.2	74718.2	77397.4	69717.7	70962.6	72071.1	71416	70165.8	73360.8	69473.7	68600.6	64949.4	63013.8	68324.9	71446.1	4.73346
	M+K	2	790.705	TG(47:1)	C50H94O6	Glycerolipids	Putative
	M+NH4	4	811.633	(octadecadienoyl)-(docosatetraenoyl)-O-[hydroxymethyl-N,N,N-trimethyl-beta-alanine]-glycerol	C50H85NO7	Glycerolipids	Putative
	M+H-H2O	9	846.665	Prenol Lipids	C55H91O4P	prenol Lipids	Putative
	M+H-H2O	2	846.671	Glycerophospholipids	C48H95O9P	Glycerophospholipids	Putative
	M+H-H2O	1	846.674	TG(52:7)	C55H90O6	Glycerolipids	Putative
	M+H	2	828.721	TG(50:3)	C53H96O6	Glycerolipids	Putative	829.726	828.718	26.33	828.7185@26.33	45130.1	57393.2	31759.1	57529.9	55380.3	60891.5	44633.5	37804.8	44508.2	46280.5	44543.2	47589.9	42541.8	41673.2	39449.5	45900	47492.4	45651.8	43805.6	47941.9	42055.4	48766.5	46561	45006.9	4.58108
	M+Na	1	806.736	TG(48:0)	C51H98O6	Glycerolipids	MS/MS
	M+NH4	3	811.69	Sphingolipids	C48H93NO8	sphingolipids	Putative
	M+K	1	792.721	TG(47:0)	C50H96O6	Glycerolipids	Putative	831.685	830.677	25.67	830.6768@25.67	51604	69056	38180.6	70484.7	68290.7	70434.7	61094	51060.3	52467.1	57407.1	54727	61569.9	58838	53876	50892.6	54674.9	54730.5	52940.8	61455.2	54432.3	48601.3	50660.5	51889.7	54633.5	6.65885
	M+NH4	3	813.648	DGTA(40:5)	C50H87NO7	Glycerolipids	Putative
	M+H-H2O	1	848.687	PG(O-42:0)	C48H97O9P	Glycerophospholipids	Putative
	M+NH4	1	816.721	TG(49:2)	C52H96O6	Glycerolipids	Putative	834.755	833.747	25.43	833.7474@25.43	66267.2	85331.1	50793.1	90098.5	89909.2	94988.3	63143.8	67721.3	67696.4	72497.1	71077.9	70158.3	72820	63959.1	65116.2	73713.2	75356.5	78006.1	70385.7	69679.7	73216.6	75071.5	73332.8	72390.2	3.46676
	M+K	4	796.547	PI(O-32:0)	C41H81O12P	Glycerophospholipids	Putative	835.507	834.499	16.02	834.4989@16.02	2471.37	5031.9	2273.49	3656.75	2683.3	3222.79	2707.94	2287.79	2925.7	1974.02	2292.05	258.801	2155.13	2635.13	1822.12	3123.81	3409.09	3292.94	3427.13	3461.45	3145.95	3323.36	3073.72	3337.41	4.31242
	M+NH4	1	818.736	TG(49:1)	C52H98O6	Glycerolipids	Putative	836.771	835.763	26.14	835.7631@26.14	103064	132374	74193.1	140239	133938	139355	104709	97707.3	106860	112460	105012	103285	103979	98970.7	100178	115551	110555	108147	105996	109099	115470	115534	116618	115270	3.56428
	M+NH4	1	820.752	TG(49:0)	C52H100O6	Glycerolipids	Putative	838.787	837.779	27.06	837.7787@27.06	55564.9	71800.9	41326	77303.8	72729.8	76754.5	57880.8	59210.5	59981.5	66020.5	56817.2	55640.6	60204.9	53450.1	54287.2	61226.7	51546.7	63319.9	54642.5	60368.2	66099.4	61195.2	62024.8	63048.9	7.48675
	M+Na	4	816.661	PA(44:0)	C47H93O8P	Glycerophospholipids	Putative	839.653	838.646	24.3	838.6456@24.3	25579.3	33517.8	16725.5	34372	33641.5	30489.4	25959.3	22844.8	26890.7	24618.2	26825.9	25737.3	25613.3	23966.6	25493.1	27610.9	26558.3	24486.9	26027.7	27335.8	23566.7	25440.7	25643	25493.5	4.98407
	M+K	1	800.689	TG(48:3)	C51H92O6	Glycerolipids	Putative
	M+H-H2O	2	856.658	TG(53:10)	C56H88O6	Glycerolipids	Putative
	M+H	2	838.705	TG(51:5)	C54H94O6	Glycerolipids	Putative	839.711	838.703	25.43	838.7031@25.43	21790.1	26947.5	16261.7	29368.6	30496.2	29541.9	22464.6	21674.7	21406	23956.1	22675.2	22556.2	22340.3	21473.7	21834.4	23090.9	22250.6	22579.7	22872.2	23672.6	22993.7	23002.7	19806.1	20442.6	5.83839
	M+Na	1	816.721	TG(49:2)	C52H96O6	Glycerolipids	Putative
	M+H-H2O	2	856.716	20:0-Glc-Campesterol	C54H96O7	sphingolipids	Putative
	M+K	2	802.705	TG(48:"2)	C51H94O6	Glycerolipids	Putative	841.67	840.662	24.91	840.6622@24.91	90766.2	109967	62972.1	114937	120056	111034	86858	89217.3	93257.1	100631	93402.1	90514.3	85409.4	87524.2	89613.5	92962.8	95560.3	96178.9	97028	96587.6	83835.9	89577.3	93693.2	94039.5	4.52229
	M+H-H2O	1	858.674	TG(53:9)	C56H90O6	Glycerolipids	Putative
	M+H	2	840.721	TG(51:4)	C54H96O6	Glycerolipids	Putative	841.726	840.718	26.14	840.7183@26.14	29245.8	36035.9	22700.2	39912.6	39053.8	39207.3	27636.9	29571.6	26224.5	31322.3	31028.1	31487	27915.2	27340.2	28515.8	24587.6	32484.3	26469.6	25018.9	31372.7	25058.4	29881.1	30356.8	27240.2	10.7431
	M+Na	1	818.736	TG(49:1)	C52H98O6	Glycerolipids	MS/MS
	M+H-H2O	9	859.703	Glycerophospholipids	C49H98NO8P	Glycerophospholipids	Putative	842.708	841.7	22.87	841.7@22.87	9739.2	14106.9	5450.63	13867.4	13885	11660.2	9675.57	10765.8	10095.2	10756.8	13751.4	10509.3	10062.9	9509.86	9454.72	10086.4	10794.8	9757.84	13461.4	9244.31	12725.2	10102.1	15474.1	10495.3	18.3031
	M+K	1	804.721	TG(48:1)	C51H96O6	Glycerolipids	Putative	843.685	842.677	25.52	842.6771@25.52	148582	195060	102588	200591	186696	189379	138742	136471	140789	148188	144088	148942	150235	144393	147690	146638	150319	143656	152889	145275	130555	138512	141810	156523	5.38522
	M+H-H2O	1	860.689	TG(53:8)	C56H92O6	Glycerolipids	Putative
	M+H	2	842.736	TG(51:3)	C54H98O6	Glycerolipids	Putative	843.742	842.734	27.06	842.734@27.06	15783.8	18444.4	10118.8	20275.3	19439.8	19363.8	15135.8	14465.3	15968.2	13870.5	13564.7	14477.4	12667.5	13168.7	13518.5	15840.9	15680.7	15787.2	15770.3	14831.6	16387.8	15319.3	15915.7	16386.1	3.07382
	M+Na	1	820.752	TG(49:0)	C52H100O6	Glycerolipids	Putative
	M+K	1	806.736	TG(48:0)	C51H98O6	Glycerolipids	Putative	845.701	844.693	26.35	844.6928@26.35	114054	150436	76935.5	152942	146917	145193	109430	104398	108355	117305	120594	109245	107895	102740	104585	115086	117016	109913	110112	112917	105563	104621	112942	113276	3.71996
	M+H-H2O	1	862.705	TG(53:7)	C56H94O6	Glycerolipids	Putative
				Unknown			-	846.293	845.285	23	845.2853@23	27864.7	36634.5	19947.9	37023.9	37739.2	38510.7	28506.8	27799	26247.3	29460.4	27926.4	29803.7	28172.6	27147.8	26729.8	29459.5	30053.9	29358.3	29439.5	30559.5	29377	29387.5	28409.6	30795.8	2.42948
	M+NH4	1	828.721	TG(50:3)	C53H96O6	Glycerolipids	Putative	846.755	845.747	25.34	845.7474@25.34	65076.3	84716.7	47822.4	88573.6	86230.3	86638.7	73368.1	62314.8	67291.2	62966.8	69349.4	67287.9	61548.5	64638.5	63725.5	73409.6	76224.2	69594.8	61079.5	67633.3	63349	61369	70548.3	72213.3	7.94328
	M+NH4	2	830.736	TG(50:2)	C53H98O6	Glycerolipids	MS/MS	848.771	847.764	25.91	847.7636@25.91	197499	253568	143029	281303	272147	271906	210887	201954	201359	227190	216137	196858	213114	187576	203486	219628	218927	205688	202378	206800	230438	228159	219109	219285	4.52847
				Unknown			-	850.251	849.244	11.31	849.2435@11.31	5787.44	10599	5347.58	9081.13	11515.5	10573.3	4368.14	8704.04	6770.49	6354.66	7067.58	6984.66	5101.91	7268.3	2044.7	8843.48	8757.11	10723.5	11064.5	9555.69	8207.01	7377.52	7998.09	7059.43	15.7071
	M+NH4	2	832.752	TG(50:1)	C53H100O6	Glycerolipids	MS/MS	850.787	849.779	26.83	849.7792@26.83	484922	624028	358078	668054	640760	659463	508316	479808	498938	530522	490468	490002	496847	471950	482143	547863	531639	510720	495196	516951	535065	528716	546393	537624	3.27178
	M+H	4	851.798	TG(51:0)	C54H97D5O6	Glycerolipids	MS/MS	852.803	851.795	27.87	851.7948@27.87	106700	139021	77131.6	143125	137419	149640	112999	103011	112410	121449	98730.2	105243	109028	102635	106104	124472	124556	111859	115136	111157	129095	121179	128008	119810	5.51687
	M+NH4	1	834.768	TG(50:0)	C53H102O6	Glycerolipids	Putative
	M+H	6	852.168	Fatty Acyls	C25H43N8O17P3S	Fatty Acyls	Putative	853.17	852.162	21.58	852.1624@21.58	7301.27	6557.42	2415.52	4973.9	1957.7	8589.57	5373.7	4273.82	4674.21	3733.4	3990.42	718.852	3182.6	5577.81	2305.48	12115.6	12459.8	12313.4	12058.7	12531.4	11968.9	11840.7	12085.5	11880.4	2.02185
	M+NH4	6	835.141	Fatty Acyls	C25H40N7O17P3S	Fatty Acyls	Putative
	M+K	1	814.705	TG(49:3)	C52H94O6	Glycerolipids	Putative	853.669	852.661	24.79	852.661@24.79	15581.3	22097	11731.2	21332.9	21428.6	22482	16965.9	15415.1	16634.8	17357	17760.4	16695.7	15801.9	16176.9	15548.4	17039.1	15838.9	16846.4	16421.7	16522.5	15537.4	17277.2	16635.7	16592.9	3.31966
	M+H-H2O	2	870.674	TG(54:10)	C57H90O6		Putative
	M+H	2	852.721	TG(52:5)	C55H96O6	Glycerolipids	Putative	853.726	852.718	25.92	852.7185@25.92	62046.2	78607.7	43946.5	82648.6	79246	82739.6	61445.8	58525.8	60701.4	64530.2	59895.6	64394.1	61063.9	58232.3	59263.4	64596	64954.8	59810.3	61426.6	64438.6	61605.9	63547.9	64144.4	64509.8	2.8765
	M+Na	1	830.736	TG(50:2)	C53H98O6	Glycerolipids	Putative
	M+H-H2O	2	870.731	Sphingolipids	C55H98O7	sphingolipids	Putative
	M+K	2	816.721	TG(49:2)	C52H96O6	Glycerolipids	Putative	855.685	854.677	25.43	854.6774@25.43	52513	65845.2	37974.5	69999.5	66288	74395.5	55316.9	48767.4	52456.3	58053.8	54775.6	52364.4	54107.2	44665.8	51765.9	57494.6	45007.5	44072.8	55414.8	49581.9	42851	48898.4	50948.6	44153.6	10.7217
	M+H-H2O	1	872.689	TG(54:9)	C57H92O6	Glycerolipids	Putative
	M+H	1	854.736	TG(52:4)	C55H98O6	Glycerolipids	Putative	855.742	854.735	26.83	854.7345@26.83	124326	163733	92715.2	168790	166275	170822	127956	124318	128085	136239	127687	131135	127174	122414	123095	136597	135180	131163	128866	132578	127405	130711	133781	134102	2.26558
	M+Na	1	832.752	TG(50:1)	C53H100O6	Glycerolipids	MS/MS
	M+NH4	3	837.706	Sphingolipids	C50H95NO8	Sphingolipids	Putative
	M+K	1	818.736	TG(49:1)	C52H98O6	Glycerolipids	Putative	857.7	856.692	26.14	856.6925@26.14	74405.1	96898.2	51087.7	95135	93281.6	92338.7	72057.5	71536.3	70735.2	83148.5	71158.4	77180.9	71856.6	69908.9	68392	75015	80683.3	71945.1	71860.7	76246.8	70880.1	61807.6	71192.7	74438.6	7.05312
	M+H-H2O	2	874.705	TG(54:8)	C57H94O6	Glycerolipids	Putative
	M+H	2	858.243	Genistein -bis(O-glucosylapioside)	C37H46O23	prenol Lipids	Putative	859.252	858.244	21.58	858.2442@21.58	12067.5	10678.8	3832.34	8335.77	3816.61	14457.8	8782.25	7144.07	7903.25	6924.41	6813.47	2610.2	5422.32	9207.12	3819.45	19699.4	19922.5	19599.4	19698.4	20298.8	18973.6	19346.6	19776.1	19642.9	1.85726
	M+K	1	820.752	TG(50:0)	C52H100O6	Glycerolipids	Putative	859.716	858.708	27.06	858.708@27.06	35358.9	46032.6	26039.3	47312.6	47670.4	49242.7	35927.5	35102.9	35774.6	37372.4	36411.7	35333.9	40179.5	34519.2	35766.3	37494.9	38773.3	41732.9	37668.2	37887	34190.6	35942.6	36280.1	37666.3	5.54419
	M+H-H2O	2	876.721	TG(54:7)	C57H96O6	Glycerolipids	Putative
	M+Na	1	839.798	TG(50:0)	C53H97D5O6	Glycerolipids	Putative	862.787	861.779	26.62	861.779@26.62	48479.3	64377.2	37222.4	69136.2	65313.2	68514	55967.4	47762.2	50633.4	55189.6	53381.3	52350.5	51862.4	48764.2	49270.6	54813.2	54737.5	52364.7	50101.5	52846.2	56217.1	57310	55997.2	57735.1	4.57455
	M+NH4	1	844.752	TG(51:2)	C54H100O6	Glycerolipids	Putative
	M+H-H2O	0	880.64	PI(O-38:0)	C47H93O12P	Glycerophospholipids	Putative	863.637	862.63	22.86	862.6296@22.86	9841.91	14154.3	6384.34	14959	12820	13238.1	9270.3	10294	10316.8	9526.4	8621.86	9240.16	10185.1	8678.06	10421.4	11095.6	10044.9	9380.95	9716.28	10273.2	10139.2	9573.2	11018.5	11245.7	6.74518
	M+NH4	1	846.768	TG(51:1)	C54H102O6	Glycerolipids	Putative	864.803	863.795	27.59	863.7948@27.59	60789.2	82646.7	46882.4	86139.7	84653.2	83434.8	65100.2	64359.3	64075	67704.6	63140.3	61755.8	64440.2	60104.3	64186	68037	66316.8	64841.5	62690.6	64129	70122.1	66956.4	68225	68003.7	3.51256
	M+NH4	1	848.783	TG(51:0)	C54H104O6	Glycerolipids	Putative	866.818	865.81	28.67	865.8098@28.67	26098.5	35632.9	18524.9	34780.4	36173.8	34823.9	28112.4	26525.7	26022	29321.6	28641.6	27764.9	26420.6	24562.3	24962.4	27747.3	29981.1	28926.5	26703.1	27126.7	29853.8	29310.5	30995.5	28836.5	4.88979
	M+K	1	828.721	TG(50:3)	C53H96O6	Glycerolipids	Putative	867.685	866.677	25.35	866.6768@25.35	44191.1	57747.2	32969.4	63460.3	59442.1	62370	45985.3	39531.3	47225.9	50000.5	44756.7	44129.1	46080.6	43573.8	43560.5	48486.5	48034	45248.8	46160.5	44536.5	42628	46137.6	47269.1	47566.6	4.04904
	M+H-H2O	2	884.689	TG(55:10)	C58H92O6	Glycerolipids	Putative
	M+K	1	830.736	TG(50:2)	C53H98O6	Glycerolipids	Putative	869.701	868.693	25.92	868.6928@25.92	139437	180948	102451	191639	183362	188262	149041	137418	142041	151663	147945	146750	140217	134128	143806	150542	153679	145045	142866	148326	139618	145235	148111	155512	3.44664
	M+H-H2O	1	886.705	TG(55:9)	C58H94O6	Glycerolipids	Putative
	M+K	2	832.752	TG(50:1)	C53H100O6	Glycerolipids	Putative	871.716	870.708	26.83	870.7085@26.83	294222	389394	220402	404231	400733	406021	309550	296403	309193	332137	312961	308449	303793	290831	296220	319890	324215	311884	307528	311427	294265	305258	312003	317856	2.83571
	M+H-H2O	1	888.721	TG(55:8)	C58H96O6	Glycerolipids	Putative
	M+NH4	1	854.736	TG(52:4)	C55H98O6	Glycerolipids	Putative	872.771	871.763	25.44	871.7633@25.44	43714.9	51263.3	29380.4	50571.4	51296.3	49346.8	44569.4	44271.8	41845.3	40411.1	36343.8	38861.1	38338.1	39452	34996.2	32306.6	39794	38564.4	43655.5	40578	34110.1	33711.8	45594.7	31824.9	13.346
	M+H	2	872.259	Polyketides	C38H48O23	Polyketides	Putative	873.268	872.26	21.58	872.2597@21.58	15332.8	14868	5151.16	10750.2	4474.84	19275.6	11202.8	9042	10291.5	7995.04	8401.61	923.453	7282	12438.1	5102.41	24145.3	24862.6	25274.9	25500.1	26837.4	23340.1	23913.9	24336.1	23912	4.3191
	M+NH4	1	855.235	Palargonidin-(ferulylglucoside)-(malonylglucoside)	C41H43O20	Polyketides	Putative
	M+K	1	834.768	TG(50:0)	C53H102O6	Glycerolipids	Putative	873.732	872.724	27.87	872.7237@27.87	78196.3	101671	57815.2	101245	99991.3	110942	80645.2	81273	76591.5	77396.1	80320	83205.2	77706.6	77383.5	74301.3	84708.4	83938.2	80471.6	84252.1	83827.6	83615.6	81550	85824.8	85932.4	2.14613
	M+H-H2O	2	890.736	TG(55:7)	C58H98O6	Glycerolipids	Putative
	M+Na	1	851.798	TG(51:0)	C54H97D5O6	Glycerolipids	Putative	874.787	873.779	26.32	873.7789@26.32	117774	151184	86092.5	160021	153911	161065	119702	113162	122414	127535	109693	117775	119379	113060	114635	131640	127810	126193	119164	113446	116570	130631	136683	131887	6.26536
	M+NH4	1	856.752	TG(52:3)	C55H100O6	Glycerolipids	Putative
				Unknown			-	875.788	874.78	26.32	874.7797@26.32	47126	64162.6	34499.1	62416.2	61137.2	63437.1	41067.7	45941.8	41826	49112.9	49184.4	45666.6	46897.3	45953.8	45629.4	51615.2	52663.9	51355.6	51736.7	53353	54522.1	54817.3	56259.1	55970.5	3.51641
	M+NH4	1	858.768	TG(52:2)	C55H102O6	Glycerolipids	Putative	876.803	875.795	27.34	875.7948@27.34	336225	441218	262126	479279	467804	465576	358606	344483	353616	379634	352420	362398	364725	324546	352072	360247	356159	347380	333817	342048	380088	368405	374280	364620	4.25562
	M+NH4	1	860.783	TG(52:1)	C55H104O6	Glycerolipids	Putative	878.818	877.811	28.41	877.8105@28.41	494077	637097	362890	657266	648435	667233	512187	480549	501153	531549	507945	495144	499965	470051	481115	535545	530564	522840	499885	508649	577117	563523	568760	553175	5.04057
	M+H	1	878.736	TG(54:6)	C57H98O6	Glycerolipids	Putative	879.742	878.734	26.32	878.7344@26.32	36385.2	47362.9	26466	43985.4	48253.5	49587.4	37269.9	36562.1	36506.9	39578.1	37398.3	37751	36252.2	35791.7	35615.2	38813.3	39834.4	37703.3	37087.6	38221.9	38327.5	36829.9	38815.2	39453.8	2.63916
	M+Na	1	856.752	TG(52:3)	C55H100O6	Glycerolipids	Putative
	M+H-H2O	2	896.747	Sphingolipids	C57H100O7	sphingolipids	Putative
	M+NH4	1	862.799	TG(52:0)	C55H106O6	Glycerolipids	Putative	880.834	879.826	29.46	879.8258@29.46	62436.3	81120.5	47078.4	88326.3	90139.6	83584.7	67931.2	63588.7	65019.1	71031.1	64254.3	69802	66465.6	60002.8	67900	68601	66811.5	66513.9	62824.9	57991.9	70583.3	71291.5	71939.3	69652.6	6.70057
	M+K	1	842.736	TG(51:3)	C54H98O6	Glycerolipids	Putative	881.7	880.692	25.93	880.6924@25.93	16310.6	19788.9	11748.9	20766.9	19274.7	19339.5	15072.9	16097.9	17133.6	16899.1	15997.2	16613.1	18143.8	14148.5	16294.5	14284.9	16631.9	15672.2	15906.8	16432.9	14440.9	15564.3	15474.8	16571.3	5.46086
	M+H-H2O	2	898.705	TG(56:10)	C59H94O6	Glycerolipids	Putative
	M+H	1	880.752	TG(54:5)	C57H100O6	Glycerolipids	Putative	881.758	880.75	27.34	880.7501@27.34	98645.3	131196	75411.8	138628	135600	138081	104029	99573.6	102674	109112	103466	107141	101645	97758.3	100393	105566	106726	104039	101319	106093	104660	102565	105593	104776	1.65345
	M+Na	1	858.768	TG(52:2)	C55H102O6	Glycerolipids	Putative
	M+H-H2O	2	898.763	22:0-Glc-Sitosterol	C57H102O7	sphingolipids	Putative
	M+K	10	843.599	PS(40:2)	C46H86NO10P	Glycerophospholipids	Putative	882.57	881.562	1.48	881.5623@1.48	2809.43	4849.87	2592.82	1171.83	839.042	1508	2870.25	2112.38	2616.27	2433.68	1952.45	69.6838	2709.85	4995.33	2220.45	2071.68	2324.77	2208.17	2239.31	2374.3	2018.7	2304.37	2126.49	2089.57	5.69829
	M+K	1	844.752	TG(51:2)	C54H100O6	Glycerolipids	Putative	883.716	882.708	26.61	882.7081@26.61	36740.9	48917.4	26782.1	52233.9	49994.4	50474.9	36729	38608.9	38364.6	41170.3	35614	38211.8	36829.2	34812.8	36595.7	40127.1	40367.2	39336.6	37769.1	39243.9	38824.9	39376.5	38233	40492.5	2.37337
	M+H-H2O	2	900.721	TG(56:9)	C59H96O6	Glycerolipids	Putative
	M+H	1	882.768	TG(54:4)	C57H102O6	Glycerolipids	Putative	883.774	882.766	28.41	882.7658@28.41	129874	167780	96997.6	169537	172576	176972	130091	128951	133304	139739	134971	134765	133487	122507	129478	142111	141154	135667	134658	136502	141753	139791	144592	143146	2.51901
	M+Na	1	860.783	TG(52:1)	C55H104O6	Glycerolipids	MS/MS
	M+K	1	846.768	TG(51:1)	C54H102O6	Glycerolipids	Putative	885.732	884.724	27.6	884.7237@27.6	47967.9	66085	36902.4	65734.4	70100.5	67939.6	53786.7	51298.5	55353.4	53423.4	52693.8	49849.1	55662.8	49536.5	49290.9	48261.4	52521.8	49753.1	49944.5	51524.1	50111.7	49538.1	51985.8	52985.2	3.11421
	M+H-H2O	2	902.736	TG(56:8)	C59H98O6	Glycerolipids	Putative
	M+H	7	888.232	Kaempferol apioside-rhamnosyl-(1->6)-(caffeoylglactoside)	C41H44O22	prenol Lipids	Putative	889.234	888.226	22.4	888.2257@22.4	757765	821889	286863	596500	213704	955875	613634	508248	560976	498643	517250	104146	393159	659528	242557	965572	968619	972868	972947	993569	969422	964809	965763	970453	0.90429
	M+NH4	1	872.783	TG(53:2)	C56H104O6	Glycerolipids	Putative	890.818	889.81	28.15	889.8101@28.15	24981.1	31989.3	19588.6	36224.5	33456.4	37904.7	27728.5	24584	25633.5	29299.6	27689	25344.5	26683.6	26169.7	25476.9	30363.4	28449.7	28967.2	26557.8	28204.7	31034.6	29357.6	31619.4	29873.9	5.29279
	M+H-H2O	0	908.672	PI(O-40:0)	C49H97O12P	Glycerophospholipids	Putative	891.669	890.661	23.63	890.661@23.63	10559.4	20085	9478.55	17310.2	18096.5	22703.1	11168.2	14017.8	15124.8	18616.3	13058.1	11776.2	12007.4	11490.6	14047	14588.4	13800.5	11566.2	14534.9	14289.4	15962.4	11001.7	13174.9	12957	11.4991
				Unknown			-	892.232	891.225	22.4	891.2245@22.4	3650.11	3387.03	1282.7	2296.82	976.021	4383.68	2466.17	2121.14	2395.01	1956.88	2182.27	447.075	1565.25	2882.22	883.505	6000.55	6102.36	5990.52	6144.89	6629.07	5601.38	5636.97	5856.46	5800.62	5.20051
	M+NH4	1	874.799	TG(53:1)	C56H106O6	Glycerolipids	Putative	892.834	891.826	29.2	891.8257@29.2	29156.1	35546.8	21190.9	40042.9	39865.1	38926	30168.3	29336.4	29888	31568.5	30241.8	28698.4	30029.4	28042.6	29171.8	31905.7	27092.9	30084.6	29337.1	29783.2	34576	33127.3	32078.3	30303.6	7.23824
	M+K	1	854.736	TG(52:4)	C55H98O6	Glycerolipids	Putative	893.701	892.693	25.44	892.6928@25.44	29186.9	40085.9	22441.5	41862.1	40830.6	41149.5	31825.2	30778.4	29893	32883.5	31570.5	30869.9	31390	27794.4	29247.5	33447.8	33584.5	28236.5	32339	32991.2	29570.2	31148	31211.7	33373.1	5.94326
	M+NH4	6	875.662	PS(42:0)	C48H94NO10P	Glycerophospholipids	Putative
	M+H-H2O	1	910.705	TG(57:11)	C60H94O6	Glycerolipids	Putative
	M+NH4	1	876.815	TG(53:0)	C56H108O6	Glycerolipids	Putative	894.849	893.841	30.23	893.8411@30.23	16287.6	20852.3	11907.8	21307.5	21203.7	22504.9	16776.6	15870	16025.9	17155.2	16979.8	16239.4	15889.8	15388	16002.7	17648.3	17798.6	17530.8	17047.9	16373.4	19032.8	19153.5	17881.1	17451.6	4.94136
	M+K	1	856.752	TG(52:2)	C55H100O6	Glycerolipids	Putative	895.716	894.708	26.33	894.7085@26.33	88558.9	113464	65054.8	117625	118218	122501	90419.3	87732.4	93197.1	96287.1	91656.9	90853.5	85327.7	84414	86260.3	92682.8	95527.5	88708.6	89386.5	93236.5	85839	88759.7	91350	92742.6	3.27529
	M+H-H2O	1	912.721	TG(57:10)	C60H96O6	Glycerolipids	Putative
	M+H	2	894.768	TG(55:5)	C58H102O6	Glycerolipids	Putative	895.773	894.765	28.15	894.7648@28.15	8878.54	11529.2	6399.34	11323	10704.4	11640.2	8626.95	8884.87	8631.35	9675.54	8798.15	9285.34	8999.37	8188.89	9046.68	9858.03	9737.03	8589.72	9081.04	9278.52	9444.68	9054.39	9543.07	9548.8	4.20545
	M+Na	0	872.783	TG(53:2)	C56H104O6	Glycerolipids	Putative
	M+K	2	858.768	TG(52:2)	C55H102O6	Glycerolipids	Putative	897.732	896.724	27.34	896.7242@27.34	248561	327868	190070	341638	338847	346656	263086	256563	259741	277834	264833	264232	261902	243099	249291	263938	271674	261151	259805	266641	251505	254664	262333	261647	2.28744
	M+H-H2O	1	914.736	TG(57:9)	C60H98O6	Glycerolipids	Putative
				Unknown			-	898.77	897.762	24.44	897.7623@24.44	18541.1	25576.4	13317.5	30821.2	31920.6	32383.5	21217.9	20829.7	21769.6	25833.6	23270.2	23272.7	21964.1	20155.2	21554.6	23659.4	21767.1	22811.6	21649.5	21056.1	25959.7	24907.6	21964.5	23233.3	7.06379
	M+K	1	860.783	TG(52:1)	C55H104O6	Glycerolipids	Putative	899.747	898.74	28.41	898.7396@28.41	362107	482449	268014	488225	483841	502236	373512	362664	367217	390419	384245	383269	372525	357091	362326	394205	396925	387087	382870	387716	393240	391989	398734	400989	1.50396
	M+H-H2O	1	916.752	TG(57:8)	C60H100O6	Glycerolipids	Putative
	M+NH4	1	882.768	TG(54:4)	C57H102O6	Glycerolipids	Putative	900.802	899.794	26.79	899.7944@26.79	66290.8	81927.3	43381.3	86550.9	82979.8	85831.5	62581.9	66779.3	64744.6	70960.1	62730.1	62967.7	66474	61351.9	61841.2	70084.3	70921.9	66630.6	63986.7	66996.5	69663	70626.7	71139.2	70730.5	3.63468
	M+K	1	862.799	TG(52:0)	C55H106O6	Glycerolipids	Putative	901.763	900.755	29.47	900.755@29.47	61188.2	81010.8	48478.6	86207.4	85322.6	87200.5	63229.3	64212.5	65336.4	68487.5	66401.4	67881.1	62358.8	61042.2	61729.6	67350.5	66837	65518.1	65609.4	65561	65885.7	66123.1	66632.5	68837.5	1.6369
	M+H-H2O	2	918.768	TG(58:7)	C60H102O6	Glycerolipids	Putative
	M+NH4	1	884.783	TG(54:3)	C57H104O6	Glycerolipids	Putative	902.818	901.81	27.88	901.8103@27.88	139570	177532	103053	188756	182264	191384	143467	140794	141641	151747	141174	139404	142679	134681	137111	154519	154553	149138	143848	146734	160520	158873	159589	156067	3.85666
	M+NH4	1	886.799	TG(54:2)	C57H106O6	Glycerolipids	Putative	904.834	903.826	28.95	903.826@28.95	130245	171800	96307.3	179416	174572	179450	135340	129949	135301	144914	135600	133480	131543	122461	131376	148084	145098	139199	135389	135916	155982	150925	152377	150557	5.14445
	M+NH4	2	888.815	TG(54:1)	C57H108O6	Glycerolipids	Putative	906.85	905.842	29.96	905.8419@29.96	246010	316477	181293	328079	326118	333204	258532	238216	251523	264250	253910	251683	247819	236929	239335	278213	267618	263589	252873	252416	293503	280074	282417	279025	5.13527
	M+H	2	906.768	TG(56:7)	C59H102O6	Glycerolipids	Putative	907.773	906.765	27.88	906.7653@27.88	43015	57286.3	31977.4	57216.4	58107.1	60141.7	44281	43682.9	43528	45661.4	44287.5	46033	44452.3	41604.6	43547.8	46823.7	46188.7	46878.8	42843.5	46865.3	45864.5	46507.8	46344	47581.3	2.93275
	M+Na	1	884.783	TG(54:3)	C57H104O6	Glycerolipids	Putative
	M+NH4	5	890.83	TG(54:0)	C57H110O6	Glycerolipids	Putative	908.859	907.851	30.92	907.8514@30.92	37529.5	48770.3	28009.8	51739	51322.7	48756.9	39509.8	36594.9	36795.5	41711.4	38110.4	37669.3	36764.5	35247.8	37575.3	43358.1	41221.5	40570.9	40586.2	40777.7	43442	41215.1	42661.1	43029.2	2.92896
	M+H	2	908.783	TG(56:4)	C59H104O6	Glycerolipids	Putative	909.789	908.781	28.95	908.7812@28.95	44363.4	56544.4	31150.2	58846.3	59780.1	60828.4	45603.6	44321.6	44503.3	48320.7	45864.1	45536.3	43958.5	40976.7	42055	47420.6	47725.8	44989.3	44386	46583.4	45319.3	47113	46814	47153.6	2.56127
	M+Na	1	886.799	TG(54:2)	C57H106O6	Glycerolipids	Putative
	M+H	1	910.799	TG(56:4)	C59H106O6	Glycerolipids	Putative	911.805	910.797	29.96	910.7972@29.96	64442.9	83419.3	48424.4	87441	84890.3	87282.9	66240.6	63970.7	64918.6	69476	66438	67990.7	64157.6	62054.1	64154	70042.4	68972	66641.5	65299.5	67989.6	69232.6	68380.5	69000.5	70177	2.31739
	M+Na	1	888.815	TG(54:1)	C57H108O6	Glycerolipids	Putative
	M+H	2	912.815	TG(56:3)	C59H108O6	Glycerolipids	Putative	913.82	912.812	30.91	912.812@30.91	9311.37	11693.2	6755.19	12599.8	13044.1	12965.4	9761.05	9364.56	9965.27	10449	9855.03	9120.72	9550.08	9111.6	9414.58	10196.9	10443	10135.1	9645.62	10524.1	9710.01	9615.99	9705.36	9647.35	3.69062
	M+Na	0	890.83	TG(56:0)	C57H110O6	Glycerolipids	Putative
	M+NH4	0	900.815	TG(55:2)	C58H108O6	Glycerolipids	Putative	918.849	917.841	29.72	917.8408@29.72	9691.07	11591.2	6864.59	12623.2	12962.6	13163.4	9606.39	9377.21	7475.26	10310.5	9728.28	10050.2	9553.04	7609.18	3425.54	11046.5	10623.4	10198.3	9516.22	9443.74	11171.8	10783.1	10593.3	10708.1	5.90911
	M+H-H2O	1	936.703	PI(O-42:0)	C51H101O12P	Glycerophospholipids	Putative	919.701	918.693	24.45	918.6928@24.45	21015.6	30010.3	14410	30938.7	29220.1	32214	20927.9	22412.8	21252.9	24787	25192.5	23747.2	23038	23274.6	22410.3	24130.5	24621.3	24408.7	23714.3	23398.1	24361.3	24409.1	25611.8	24123.8	2.54712
	M+H-H2O	1	936.703	PI(O-42:0)	C51H101O12P	Glycerophospholipids	Putative	919.701	918.693	24.45	918.6928@24.45	21015.6	29714.6	14376.3	29337.6	27188.1	26899.7	24676	23334.9	24631	24836	25336.8	23829.8	21703	22965.1	22157.1	23487.7	21199.9	23930	21593.2	21615.7	23262.9	23832.9	23360.3	22723.4	4.59545
	M+K	1	880.752	TG(54:5)	C57H100O6	Glycerolipids	Putative	919.716	918.708	25.85	918.7081@25.85	27721.6	37444.6	19112.7	38119.6	38010	36266.8	28467	30814.7	27185.1	28471.5	30112	29262.8	28314.8	27752.6	27567.2	30334.1	30493.2	29521.5	29389	30947	27114.4	28809.4	28439	30543.2	4.17952
	M+NH4	6	901.677	PS(44:1)	C50H96NO10P	Glycerolipids	Putative
	M+H-H2O	2	936.721	TG(59:12)	C62H96O6	Glycerolipids	Putative
	M+NH4	10	902.269	Polyketides	C39H50O24	Polyketides	Putative	920.312	919.304	24	919.3038@24	25315.2	30919.7	17824.7	33483	31713.9	33528.7	24269	24469.1	25168.4	26491.8	25635.8	25453	24728.3	23311.9	24721.1	26239.9	27002.5	26814.6	24699.7	26607.3	26501.7	26644.1	26786.5	26109.6	2.61068
	M+NH4	0	902.83	TG(55:1)	C58H110O6	Glycerolipids	Putative	920.864	919.857	30.95	919.8566@30.95	16466.9	21406.7	12448.1	23337.8	22583.6	21948	17680.2	16442.3	17403.9	18522.9	16900.4	17906.1	16303.5	16281.3	16522.8	19006.3	18393.5	17615.2	17073.3	17327.9	19806.4	19014.8	18636.4	18436	4.83008
	M+K	1	882.768	TG(54:4)	C57H102O6	Glycerolipids	Putative	921.732	920.724	26.79	920.7238@26.79	46256.1	60386	34710	62706	60593.3	60757.6	46780.5	47319.7	43685	49400.9	47656.8	48517.2	47528.6	45796.8	45340.4	47448.4	49018.3	47143.4	48190.6	48582.2	43458.4	45901.1	47347.9	48737.9	3.67742
	M+NH4	6	903.693	PS(44:0)	C50H98NO10P	Glycerophospholipids	Putative
	M+H-H2O	2	938.736	TG(59:11)	C62H98O6	Glycerolipids	Putative
	M+K	1	884.783	TG(54:3)	C57H104O6	Glycerolipids	Putative	923.748	922.74	27.88	922.7397@27.88	115926	152856	84715.3	152889	153084	158922	116130	120184	115252	123465	117287	122348	115656	112768	113329	124879	125487	119504	121814	123722	125609	124528	127689	123821	1.899
	M+H-H2O	1	940.752	TG(59:10)	C62H100O6	Glycerolipids	Putative
				Unknown			-	924.27	923.262	14.55	923.2622@14.55	5562.53	9860.04	4758.6	8092.27	8642.48	10259.2	4733.3	7745.83	6281.4	5083.41	6703.31	6726.95	4011.21	6195.39	2123.11	7327.72	8034.2	10404.9	9782.69	9778.56	6969.88	6857.92	7088.41	6052.91	19.4632
				Unknown			-	924.787	923.779	24.78	923.7788@24.78	21818.6	27287.8	16104.4	27906.4	26651.7	28553.5	22096.6	20411.5	22666.4	23284.8	21775.4	21283.8	22728.6	20805.3	20843.3	25621.6	23974.3	21211.1	20030.6	21488.7	24491.2	23569.8	23763.7	22363.5	7.80112
	M+K	1	886.799	Glycerolipids	C57H106O6	Glycerolipids	Putative	925.763	924.755	28.95	924.7554@28.95	130723	174172	96615.7	174144	179500	178315	135653	133706	132281	139986	137510	138344	129483	125688	128675	141606	142576	136771	138266	140523	143001	139265	144310	139952	1.71681
	M+H-H2O	1	942.768	TG(59:9)	C62H102O6	Glycerolipids	Putative
	M+K	8	888.232	Kaempferol apioside-rhamnosyl-(1->6)-(caffeoylglactoside)	C41H44O22	Polyketides	Putative	927.189	926.181	22.4	926.1808@22.4	9618.56	8471.98	2867.66	5667.63	2795.04	11314	7256.15	5304.54	5919.37	5086.71	5373.1	1228.38	4099.38	7290.7	2766.88	15925.7	15860.5	15938.4	16067.1	16508.8	15279.1	14830.8	15855.5	15571.8	3.06257
	M+H-H2O	6	944.186	Apigenin glucuronide-(coumaroylglucuronosyl)-(1->2)-glucuronide	C42H40O25	Polyketides	Putative
	M+NH4	1	912.815	TG(56:3)	C59H108O6	Glycerolipids	Putative	930.849	929.841	29.43	929.8412@29.43	11554.3	14806.7	8796.18	15389.1	16592.1	16904.3	12878.2	11764.7	11724	13079.4	11511.6	12933.9	12094.4	10583.8	12155	12841.8	11391	11796.8	11393.7	12154	12512.3	13126.8	13032.3	11411.8	5.91098
	M+NH4	1	914.83	TG(56:2)	C59H110O6	Glycerolipids	Putative	932.865	931.857	30.47	931.8568@30.47	22946.1	29398	16322.5	30241.5	26467.9	27622.3	22549.4	17568.6	21908.1	23550.5	19238	22025.9	22616.7	21978.7	22121.2	24750.2	23386.7	22608.7	17949.3	23509.3	26886.3	22253	23455.7	25069.1	10.545
	M+H	5	932.259	Polyketides	C43H48O23	Polyketides	Putative	933.27	932.263	22.4	932.2626@22.4	13259.3	11955.8	4040.83	8523.37	3825.63	15519.9	9131.03	7255.41	8121.46	7570.32	7338.22	2072.07	5790.05	10024.1	3878.28	20742.6	20986.8	20608.9	20049.4	21307.9	20483.2	20047.9	20948.3	20239.7	2.13241
	M+H	8	944.716	DAT(39:0(2Me[S],4Me[S]))	C53H100O13	sphingolipids	Putative	945.716	944.709	24.78	944.7086@24.78	20862.4	25191.1	13898.7	28499.9	28215	27338.5	22093.5	20184.6	21459.4	23760.5	20722.3	21406.5	20603.8	19078.7	20467.2	24409.1	23805.4	23251.5	22354.9	21896.4	21659.7	23151.9	23429.9	23402.2	3.90716
				Unknown			-	947.221	946.213	23.28	946.213@23.28	4778.39	4711.91	1487.91	3202.37	1336.18	5532.39	3108.35	2663.44	2871.76	2636.72	2833.57	544.798	1997.94	3619.44	1283.22	7450.84	7581.26	7766.74	7931.11	8226.14	7331.2	7136.46	7109.55	7459.16	4.86606
				Unknown			-	947.286	946.278	22.4	946.2783@22.4	23756.3	21891.6	7490.8	15609.2	7068.21	28520.2	15964.4	13225.8	14811.4	12902.7	14059.6	2754.02	10421.2	18207.7	7272.85	34830.1	35595.9	36193.7	35742.6	38449.2	34678.7	33725	35730.7	35526.3	3.64407
				Unknown			-	947.732	946.724	25.32	946.7238@25.32	6517.92	9028.06	5386.39	8400.24	9526.62	9605.22	6984.96	6681.8	6461.78	8219.64	8079.08	8571.11	6706.76	6646.66	7541.53	8881.58	6381.15	6934.46	6857.47	7359.67	7150.6	6117.07	6737.36	6858.24	11.1993
	M+H	4	949.282	Lauroyl-CoA	C33H58N7O17P3S	Fatty Acyls	Putative	950.286	949.278	22.4	949.2777@22.4	5969.03	5556.61	2008.14	4102.4	1992.9	7368.39	4173.32	3495.09	3763.93	3188.89	3591.99	783.994	2796.35	4640.17	1860.7	8763.87	8920.28	8789.98	8904.17	9631.43	8657.53	8360.91	8687.34	8622.2	3.95678
	M+NH4	7	932.259	Polyketides	C43H48O23	Polyketides	Putative
	M+K	1	914.83	TG(56:2)	C59H110O6	Glycerolipids	Putative	953.794	952.786	30.48	952.7864@30.48	21728	27087.7	16138.7	25120.5	28951.9	29961.5	19186.9	21473.8	19701.8	22505	21779.3	22889.4	21848.5	15379.2	22196.9	12797.2	19194.6	22546.5	20929.6	22860.4	18382.8	14589.7	22776.6	19672.4	18.6243
	M+H-H2O	1	970.799	TG(61:9)	C64H106O6	Glycerolipids	Putative
				Unknown			-	963.253	962.245	23.28	962.2448@23.28	837731	873643	297090	621807	212663	1.04878e+06	652476	533408	607363	528825	556909	100153	413883	710730	253845	1.06845e+06	1.07575e+06	1.08083e+06	1.08405e+06	1.10109e+06	1.06489e+06	1.06911e+06	1.07473e+06	1.07272e+06	1.01262
				Unknown			-	975.763	974.755	26.81	974.7551@26.81	5522.2	7523.83	4064.78	8012.41	7973.44	8217.64	5838.25	5808.48	6349.91	6812.13	5786.7	6505.81	6017.18	5008.67	6344.71	6456.99	5695.59	5500.87	5951.25	5781.15	3160.32	6153.8	6203.13	6211.76	17.441
				Unknown			-	994.331	993.323	25.21	993.3228@25.21	23101	29503.8	16795.3	30997.6	30593.2	31515.6	22360.2	22489.3	22515.1	24746.2	23629	23235.5	22790.6	23226.2	22515	24781.2	25350.4	24547.6	23963.9	24347.3	24253	24170.3	25504.9	25120.7	2.22786
				Unknown			-	1001.21	1000.2	23.28	1000.1997@23.28	14337.5	13017.1	4319.96	9264.05	3600.7	17234.1	9837.89	7714.06	9032.12	7760.64	8098.83	1904.84	6316.78	11249.2	4052.69	24335	24252.3	23937	24195.9	24028.3	23158.1	23464.7	23761.5	23566.6	1.67095
	M+NH4	1	989.256	Pelargonidin (ferulylsambubioside)-(malonylglucoside)	C45H49O25	Polyketides	Putative	1007.29	1006.28	23.28	1006.2811@23.28	15270.3	14057.1	4813.1	10210.9	4134	18446.4	10759.1	8359.34	10045.8	8701.61	8830.11	2399.37	6797.35	11914.8	4706.76	23607.1	24172.5	23880.9	23109.4	24000	23669.5	23858.6	24782.1	23622.8	1.92534
				Unknown			-	1021.3	1020.3	23.28	1020.2971@23.28	28930.1	26506.1	9063.3	19228.3	8432.3	34551.4	20501.4	16167.7	18376.5	16220.2	17652.8	4496.78	12884.6	22649	8317.13	42297.4	43440.2	43602	43811.8	45714.3	41547.1	41643.8	42877.9	41290.6	3.2848
	M+H	1	1023.3	Pelargonidin rutinoside-(((glucosyl)-hydroxybenzoyl)glucoside)	C46H55O26	Polyketides	Putative	1024.3	1023.3	23.28	1023.2964@23.28	8346.13	7749.12	2809.24	5765.83	2420.61	10140.8	5963.64	4912.09	5661.89	4798.56	5317.36	1357.18	3959.52	6466.36	2600.41	12273.2	12514.1	12115.6	12227.2	12856.4	11764.6	11930.9	12545.1	11742.4	3.07592
	M+H-H2O	1	1041.31	Enoyl-OPC8-CoA	C39H62N7O18P3S	Fatty Acyls	Putative
				Unknown			-	1037.27	1036.26	24.34	1036.2635@24.34	1.15923e+06	1.13829e+06	375210	795506	276921	1.40233e+06	872544	687416	805708	691192	708812	132669	513189	953882	309825	1.5287e+06	1.55591e+06	1.54732e+06	1.55727e+06	1.58794e+06	1.54217e+06	1.53562e+06	1.53742e+06	1.54052e+06	1.13542
				Unknown			-	1054.3	1053.29	24.34	1053.29@24.34	624099	624700	209636	444152	154174	761969	479756	379836	445949	383153	392860	71365.7	286240	521734	172655	799861	813843	810451	814782	828614	809525	807397	805808	808123	0.982038
				Unknown			-	1068.35	1067.34	26.74	1067.3416@26.74	18854	25464.6	14252.7	25973.4	25881.6	26930.6	19415.5	18874.6	18731.8	19999.8	19426.4	20079.6	19816.8	19489.4	19143.1	21301.9	21513.5	20358.2	19828.6	20755	21251.3	19831.4	20463	20925	2.99276
	M+K	5	1033.34	Oxoisoheptadecanoyl-CoA	C38H66N7O18P3S	Fatty Acyls	Putative	1072.31	1071.3	20.33	1071.2997@20.33	6230.35	8414.78	3835.58	6781.5	7493.86	8826.22	5108.05	7445.64	6667.65	4148.2	6796.85	5813.96	3638.6	4824.99	2943.93	6192.41	7544.16	8967.9	8151.73	9134.37	6447.63	6499.53	6320.14	5677.64	17.7041
				Unknown			-	1075.23	1074.22	24.34	1074.2184@24.34	17819.8	14969.2	5250.36	11175.8	4450.01	21013	12200.1	9334.27	11370.3	9262.66	9630.55	2255.28	6998.16	13181.5	4533.2	29285.2	29489	29430.4	28998.7	30329	27977.6	28304.1	28702.1	28460.8	2.49309
				Unknown			-	1081.31	1080.3	24.34	1080.3004@24.34	24237.4	20811.4	7378.24	16157.8	6476.71	27131.1	17323.7	13135.5	15530.9	13721.6	13247.1	3797.92	10656.6	18103.6	6964.61	36427.6	37698.9	35036.6	35179.2	37323.8	36036.3	35977.2	35102.5	35950.8	2.62446
				Unknown			-	1095.32	1094.32	24.34	1094.3155@24.34	42872	39159.5	13716.1	29367.5	13094.7	46868.2	31017.6	23914.7	29044.2	25426.6	24397.3	7001.35	19673.3	33487.6	12778	63290.6	64750.2	60714.5	62324.1	67188.1	60478	60119.8	57374.9	61049.3	4.6384
				Unknown			-	1111.29	1110.28	25.68	1110.2814@25.68	12179	11394.8	4029.49	7584.46	3345.33	14861.9	8164.86	7014.17	8056.66	6737.33	7416.71	1967.97	5145.62	9620.9	3324.27	20309.9	19902.6	20079.7	20918.6	22267.6	19062.5	18815.9	19664.4	19398	5.24206
				Unknown			-	1128.32	1127.31	25.69	1127.3087@25.69	1.23447e+06	1.14844e+06	373788	778121	272119	1.4785e+06	884147	693320	829380	686958	720967	137299	500587	986991	297729	1.69909e+06	1.7243e+06	1.72314e+06	1.72659e+06	1.7672e+06	1.70481e+06	1.70284e+06	1.72086e+06	1.70529e+06	1.21227
				Unknown			-	1142.37	1141.36	28.64	1141.36@28.64	18688.1	25570.8	13774	25702.8	25709	26026	19692.2	18767.6	19270.5	20704.6	20307.9	20624.1	19341.7	18826.7	19222.1	20947.5	21221.6	20499	19261.7	20899.9	21082.5	20815	21069.2	20128.6	3.00804
				Unknown			-	1149.25	1148.24	25.69	1148.2372@25.69	19705	16318	5647.56	11843.6	4882.11	22458.4	13502.2	10035.8	12945.4	10571.6	10733.9	2614.67	7879.36	14504.2	4810.54	32989	34005.9	32893	32401.9	34374.8	31466.2	31780.9	32071.9	32756.6	2.9493
	M+NH4	1	1137.29	Cyanidin O-[-O-(xylosyl)-O-(O-(glucosyl) coumaroyl) glucoside] O-[O-(malonyl) glucoside]	C50H57O30	Polyketides	Putative	1155.33	1154.32	25.69	1154.3187@25.69	26870.8	23697.4	8565.81	17814.9	7314.83	31715.8	19442.2	14843.1	18334.2	15461.5	15469.3	4094.05	11881.4	20673	7576.9	41646.1	41666.8	40186	39951.8	41287.2	41633.6	41017.6	41933.7	40589.2	1.73239
				Unknown			-	1165.75	1164.74	2.18	1164.7404@2.18	2594.52	5611.92	4178.41	2129.89	1799.74	2470.53	3037.73	1914.94	2458.58	2218.14	2153.66	211.804	2814.85	4146.81	1949.14	2261.27	2658.25	2721.43	2415.49	2894.04	2778.24	2247.89	2533.67	2635.08	8.77667
				Unknown			-	1169.34	1168.33	25.68	1168.3349@25.68	50017.8	46488.6	16500.8	35255.3	15440.3	60984.7	37180.3	30162	33898.5	30097.6	31116.7	8425.46	23081.4	39793.2	15167	73577.3	74775.5	74502.4	74270.1	77868	72239.2	71096	73359.9	72432.9	2.62751
	M+NH4	7	1167.28	Polyketides	C54H55O29	Polyketides	Putative	1185.31	1184.3	27.45	1184.3006@27.45	7573.2	6689.34	2281.03	4491.66	1986	8568.95	4861.1	4067.21	4766.86	3956.01	4271.38	1118.73	3041.18	5917.95	2010.69	11381.6	11667.8	11501.9	11978.1	12896.2	10895.5	10438.8	11240.1	11245.3	6.03699

## Sheet: OF
Name	Class	Feature
PG(16:0/0:0)	Glycerophospholipids	484.283@1.89	1.6215	-1.31677	-2.34532	-1.76765
PG(16:0/0:0)	Glycerophospholipids	522.2387@1.89	1.62683	-1.24344	-2.31169	-1.7227
PG(20:5(5Z,8Z,11Z,14Z,17Z)/0:0)	Glycerophospholipids	530.2669@1.94	-1.26211	-1.51623	-2.6123	-1.67901
PG(15:0/12:0)	Glycerophospholipids	652.434@6.58	-1.2304	-1.48624	-2.29138	-1.69032
PG(15:0/14:0)	Glycerophospholipids	662.4467@16.03	1.12563	-1.1186	-1.86348	-1.2673
PG(14:1(9Z)/17:0)	Glycerophospholipids	706.4841@16.02	1.03363	-1.21868	-2.15111	-1.45527
PE(P-16:0/17:2(9Z,12Z))	Glycerophospholipids	707.482@1.44	1.27868	3.5968	6.4568	35.0378
PG(18:1(9Z)/14:0)	Glycerophospholipids	720.4997@16.02	-1.07831	-1.31107	-2.17758	-1.42453
PG	Glycerophospholipids	828.6616@24.98	1.35615	-1.0541	1.02006	1.0148

## Sheet: PE
PE(P-16:0/17:2(9Z,12Z))	27.8683	259.68	545.68	3403.78

## Sheet: byCATEGORY
Category	Feature	prom G1-G5			Category		Percent	Percent W/UK
Fatty Acyls	100.0525@0.97	213.379			Fatty Acyls	1.03456e+06	0.0614304	0.0485795
Fatty Acyls	100.0526@4	11298.4			Prenol Lipids	882194	0.0523832	0.0414249
	104.0736@1.03	11625.4			Sphingolipids	44076.3	0.00261717	0.00206967
	105.058@0.98	216.336			Saccharolipids	13034.9	0.000773992	0.000612077
Fatty Acyls	110.0369@0.96	5698.37			Glycerolipids	1.10603e+07	0.65674	0.519353
Fatty Acyls	110.1096@1.62	4663.54			Sterol Lipids	84033.5	0.00498976	0.00394593
Fatty Acyls	120.0435@1.05	11206.8			Glycerophospholipids	2.43492e+06	0.144581	0.114336
Fatty Acyls	128.0458@4	58521.6			Polyketides	1.28808e+06	0.0764842	0.0604841
Fatty Acyls	128.0473@4	58780.2			total	1.68412e+07
	129.0692@1.09	4522.67
Fatty Acyls	129.1518@0.9	7295.36			Other/Unknown	4.45507e+06		0.209195
	132.0699@1.06	16100
Prenol Lipids	132.0939@1.89	9332.58			total w UK	2.12962e+07
Fatty Acyls	146.058@4	3617.75
	148.016@1.39	8996.98
Fatty Acyls	149.0317@1.06	24971
	157.1581@1.08	2883.68
	165.0692@1.1	12598.3
Fatty Acyls	172.0734@0.96	19806.4
	172.1006@1.06	212.397
Fatty Acyls	188.1048@1.89	7936.71
Fatty Acyls	199.1939@1.41	11528
	200.1072@1.1	9726.21
	200.1079@1.07	526.464
Fatty Acyls	201.173@0.88	2677.49
	206.0251@1.23	4111.46
	206.0251@1.47	4985.14
	206.0251@20.28	1359.48
	206.0255@17.12	1664.83
Fatty Acyls	213.2093@1.66	4369.57
	220.0773@17.13	4376.3
	220.0773@13.82	3965.93
	220.0773@22.4	2108.58
	220.0774@21.58	3649.72
	222.0563@1.9	5749.39
	222.0566@1.23	4121.91
	222.0566@1.47	5685.78
	222.0566@2.65	2576.56
Fatty Acyls	224.1363@1.1	36058.6
Fatty Acyls	224.1427@1.1	19807.3
Sphingolipids	227.2251@1.68	6885.83
Fatty Acyls	241.2408@2	5001.65
Fatty Acyls	254.1672@1.58	1639.02
Fatty Acyls	255.2564@2.28	17547.7
Fatty Acyls	256.2406@2.45	20676.5
Fatty Acyls	257.2358@1.71	2713.17
Fatty Acyls	257.2359@1.54	8277.65
Fatty Acyls	258.1835@4	8618.97
Fatty Acyls	264.2457@2.53	183558
Fatty Acyls	266.2611@3.35	45896.8
Fatty Acyls	269.2722@2.45	6737.04
	272.1593@0.97	386.457
Sphingolipids	273.2672@1.23	2529.46
	280.0439@1.9	5138.68
	280.0439@10.36	4725.05
	280.0441@1.47	5223.93
	280.0441@20.28	6428.51
	280.0441@22.4	1808.66
	280.0443@17.12	3381.15
	280.0443@13.82	4988.16
	280.1024@1.03	329.346
Fatty Acyls	280.1436@1.06	6451.71
Fatty Acyls	282.2563@2.45	18192.6
	282.2876@1.11	1928.83
Fatty Acyls	283.2874@2.94	2413.4
Fatty Acyls	283.2875@3.23	2204.16
Fatty Acyls	289.262@1.31	9886.07
Saccharolipids	294.096@22.4	1215.11
Saccharolipids	294.0965@17.13	1474.41
Fatty Acyls	297.3035@3.36	12555.8
Fatty Acyls	297.3036@3.96	6821.78
Fatty Acyls	303.2542@2.53	3287.85
Fatty Acyls	303.3047@1.05	2674.37
Fatty Acyls	310.2877@3.35	29427.9
Fatty Acyls	311.3189@4.08	4838.92
Fatty Acyls	315.2048@0.97	3968.05
Fatty Acyls	320.3082@4.86	13036.9
Fatty Acyls	320.3085@4.64	91210.5
Fatty Acyls	325.3349@4.84	9509.85
Glycerolipids	330.2775@2.45	29991.8
Fatty Acyls	336.194@1.89	4445.02
Fatty Acyls	337.335@4.86	12827
Fatty Acyls	339.35@6.32	2566.25
	340.0109@20.28	2308.6
	340.0111@17.12	3954.27
Fatty Acyls	353.366@7.6	4923.09
Fatty Acyls	353.3662@6.5	5528.99
	354.0628@20.28	5345.96
	354.0629@13.82	16666
	354.0629@2.65	3402.38
	354.063@22.4	5155.83
	354.063@17.12	9329.35
	354.0631@21.58	11100.5
	354.0631@24.34	1308.97
Fatty Acyls	356.274@2.45	4179.48
Glycerolipids	358.3087@3.35	89035.2
	362.3033@1.92	390.487
Fatty Acyls	367.3816@7.79	2475.32
Fatty Acyls	367.3817@8.61	9470.22
	370.0942@2.65	8079.64
	370.0943@3.9	3631.77
Fatty Acyls	370.3089@4	54318.5
	381.3974@9.14	5788.34
Fatty Acyls	386.1791@1.03	17034.6
	393.3401@7.98	88905.8
Fatty Acyls	408.2646@4	6640.02
	412.1758@1.03	4384.28
	414.0295@10.36	2515.42
	414.0296@20.28	1988.87
	414.0297@13.82	2620.28
Fatty Acyls	414.2037@1.06	74930.7
Fatty Acyls	426.2985@1.54	4789.98
	428.0817@20.28	8227.08
	428.0819@21.58	4203.71
	428.0819@22.4	6548.74
	428.082@17.13	17735.1
	428.082@24.34	1278.75
	428.0821@23.28	3213.18
Sterol Lipids	430.3121@23.36	43184.6
	440.2079@1.06	13769.4
Sterol Lipids	444.3266@2.45	32655.9
Fatty Acyls	452.1669@1.06	3392.09
	452.2119@2.84	7597.68
	470.3246@1.53	6989.27
Prenol Lipids	472.3579@3.35	75009.5
Sterol Lipids	482.2823@2.45	2597.01
Glycerophospholipids	484.283@1.89	43518
Sterol Lipids	484.3531@0.98	5205.44
	488.0483@17.12	2226.78
	488.0486@13.81	2924.23
	502.1003@22.4	1873.87
	502.1004@20.28	13765.8
	502.1004@10.36	5875.39
	502.1006@23.28	3060.97
	502.1007@21.58	4994.1
	502.1016@24.34	3175.11
	505.3601@2.45	3387.76
Polyketides	510.2795@1.89	9056.86
	514.351@1.51	10569.5
Polyketides	518.1319@10.36	37754.9
Polyketides	521.1303@10.36	3844.21
Glycerophospholipids	522.2387@1.89	1635.62
	523.5693@17.11	4768.72
Glycerophospholipids	530.2669@1.94	5561.67
	530.3474@2.45	955.315
	535.5695@20.52	1672.88
	536.5284@12.47	5557.28
	551.6009@19.81	25245.2
	553.1688@2.65	2858.74
	558.377@1.49	11318.7
Polyketides	562.067@17.12	1585.26
Polyketides	562.0671@20.28	1131.86
	562.5439@2.53	22786.1
	564.5594@15.19	7994.84
	576.1193@21.58	6448.02
	576.1193@13.81	9126.18
	576.1194@22.4	1962.18
	576.1196@24.33	1026
Fatty Acyls	576.5121@28.41	11136.4
Glycerolipids	578.5279@18.98	37721.9
	579.1177@13.82	1355.62
	579.6324@21.3	18719.4
	592.1505@13.82	1868.91
Glycerolipids	596.5383@18.97	21937.3
Prenol Lipids	598.3841@1.05	3932.32
	600.3109@2.08	503.652
Saccharolipids	602.4033@1.47	10345.4
Glycerolipids	604.5434@29.96	6845.17
Prenol Lipids	606.3839@16.02	16098.2
Glycerophospholipids	606.4628@16.24	3463.29
Glycerolipids	606.5594@20.89	177500
	607.6636@22.13	49158.6
Polyketides	609.1772@13.82	212886
Polyketides	614.1737@13.82	1922.93
Sterol Lipids	617.3928@1.89	390.579
	627.1875@3.9	6867.84
Glycerophospholipids	634.4941@18.98	6997.85
	635.6944@22.95	7465.63
Glycerolipids	641.5964@20.89	18550.2
	646.4292@1.46	8160.74
Glycerophospholipids	646.452@21.33	234890
Glycerolipids	648.5094@22.34	16126.3
	650.1378@22.4	3185.6
	650.1379@17.12	7809.84
Glycerophospholipids	652.434@6.58	3647.42
	653.1361@17.12	1466.23
Glycerolipids	655.575@20.89	74808.4
Glycerophospholipids	662.4467@16.03	701409
	663.7258@23.87	9285.86
	666.1693@17.12	1613.06
Glycerolipids	668.5407@2.45	8835.42
	674.6692@4.64	7799.03
Glycerophospholipids	680.4132@21.33	16130
Glycerolipids	682.5939@23.36	1.77139e+06
	683.196@17.12	389104
Glycerolipids	683.6066@21.76	90617.7
	689.1913@17.12	1479.5
	697.2482@21.11	56637.4
Glycerolipids	698.5885@21.51	131072
Glycerophospholipids	700.4025@16.02	31565.6
	701.2066@5.77	6957.63
Polyketides	704.125@17.12	940.952
Glycerophospholipids	704.5358@21.77	57597.5
Glycerophospholipids	706.4841@16.02	18718.5
Glycerophospholipids	707.482@1.44	5629.06
Glycerolipids	707.6066@21.53	23187
Glycerolipids	709.6217@22.04	56211.4
Glycerolipids	711.6378@22.54	59290.4
Glycerophospholipids	716.5194@2.45	2314.24
Glycerophospholipids	720.4997@16.02	22853.4
Glycerophospholipids	720.5501@23.36	424869
Polyketides	724.1565@20.28	5418.99
Glycerolipids	724.6035@3.35	31650
Glycerophospholipids	730.5509@22.03	28438.1
Glycerophospholipids	732.5662@22.51	37489.6
Glycerophospholipids	735.5356@16.02	4492.91
Glycerophospholipids	736.5443@21.52	35685.6
Glycerophospholipids	736.5445@23.36	59927.4
Glycerolipids	737.6532@22.75	42821.3
Glycerolipids	739.6692@23.35	106955
Polyketides	740.1883@20.28	470615
Glycerophospholipids	749.515@16.02	7441.34
Glycerophospholipids	751.5077@1.41	3413.86
Glycerolipids	756.5674@22.27	7818.79
Polyketides	757.2151@20.28	445590
Prenol Lipids	758.2157@20.28	254984
Glycerophospholipids	758.5821@22.75	21243.3
Glycerophospholipids	760.5982@23.21	31687.5
Polyketides	763.2101@20.28	2718.11
Glycerophospholipids	763.531@16.02	2168.38
Sphingolipids	767.6267@3.35	8769.54
Glycerolipids	767.7006@24.07	85172
	771.2668@22.09	34087.3
Glycerophospholipids	772.5985@23.08	10875.4
Glycerophospholipids	774.6139@23.59	15239.5
	775.225@8.29	6107.97
Polyketides	778.1436@20.28	2220.69
Sphingolipids	779.5611@16.02	3639.31
Glycerolipids	779.7006@23.97	61152.8
Glycerolipids	781.7161@24.53	64491.8
Polyketides	784.2256@20.28	4044.5
Glycerophospholipids	784.5985@23.03	14617.2
Glycerophospholipids	786.614@23.52	37294.4
Glycerophospholipids	788.6297@24.08	50265.7
Glycerophospholipids	789.5469@16.02	3379.67
Glycerophospholipids	790.4915@16.02	16283.3
Glycerolipids	791.7006@23.91	70892.3
Glycerolipids	793.7169@24.46	144742
Glycerolipids	795.732@25.1	136188
	798.241@20.28	1587.99
Glycerolipids	798.6719@24.47	42224.2
Glycerolipids	799.6166@2.45	1625.89
Glycerophospholipids	800.6297@23.96	38079.2
Glycerolipids	800.687@25.1	36683.4
Glycerophospholipids	802.6453@24.53	40302.3
Glycerolipids	805.7163@24.39	60589.2
Glycerolipids	807.7322@24.98	113958
Glycerolipids	809.7475@25.64	89746.8
Glycerophospholipids	812.6297@23.91	43861
	814.2068@21.58	492257
Glycerophospholipids	814.6462@24.46	92600.7
Glycerolipids	814.7022@25.69	24843.7
Glycerophospholipids	816.6608@25.1	84209.4
Glycerolipids	817.716@24.29	38933
Glycerolipids	819.7325@24.91	147324
Glycerolipids	821.7478@25.51	229822
Glycerolipids	823.7635@26.35	184687
Glycerophospholipids	824.6299@23.82	8353.87
Glycerolipids	824.6878@24.91	43210.2
Glycerolipids	826.6457@24.39	41086.9
Glycerophospholipids	828.6616@24.98	74630.5
Glycerolipids	828.7185@26.33	46473.9
Glycerolipids	830.6768@25.67	57998.8
Glycerolipids	833.7474@25.43	72771.8
Glycerophospholipids	834.4989@16.02	2559.88
Glycerolipids	835.7631@26.14	110422
Glycerolipids	837.7787@27.06	61264.9
Glycerophospholipids	838.6456@24.3	26818.3
Glycerolipids	838.7031@25.43	23652.5
Glycerolipids	840.6622@24.91	95077.3
Glycerolipids	840.7183@26.14	31146.5
Glycerophospholipids	841.7@22.87	10886.1
Glycerolipids	842.6771@25.52	154829
Glycerolipids	842.734@27.06	15350.8
Glycerolipids	844.6928@26.35	118068
	845.2853@23	29967.7
Glycerolipids	845.7474@25.34	70103.2
Glycerolipids	847.7636@25.91	218534
	849.2435@11.31	7171.23
Glycerolipids	849.7792@26.83	525620
Glycerolipids	851.7948@27.87	114976
Fatty Acyls	852.1624@21.58	4375.05
Glycerolipids	852.661@24.79	17533.9
Glycerolipids	852.7185@25.92	65152.5
Glycerolipids	854.6774@25.43	55952.6
Glycerolipids	854.7345@26.83	135651
Glycerolipids	856.6925@26.14	77274.7
prenol Lipids	858.2442@21.58	7454.35
Glycerolipids	858.708@27.06	38536.3
Glycerolipids	861.779@26.62	54548.3
Glycerophospholipids	862.6296@22.86	10530.1
Glycerolipids	863.7948@27.59	67960.8
Glycerolipids	865.8098@28.67	28557.9
Glycerolipids	866.6768@25.35	48334.9
Glycerolipids	868.6928@25.92	151940
Glycerolipids	870.7085@26.83	324969
Glycerolipids	871.7633@25.44	42310.8
Polyketides	872.2597@21.58	9502.1
Glycerolipids	872.7237@27.87	83912.2
Glycerolipids	873.7789@26.32	125827
	874.7797@26.32	49603.9
Glycerolipids	875.7948@27.34	376315
Glycerolipids	877.8105@28.41	529777
Glycerolipids	878.7344@26.32	38984.4
Glycerolipids	879.8258@29.46	69912
Glycerolipids	880.6924@25.93	16908.7
Glycerolipids	880.7501@27.34	109557
Glycerophospholipids	881.5623@1.48	2383.42
Glycerolipids	882.7081@26.61	40138.7
Glycerolipids	882.7658@28.41	140069
Glycerolipids	884.7237@27.6	55041.7
prenol Lipids	888.2257@22.4	515383
Glycerolipids	889.8101@28.15	28183.6
Glycerophospholipids	890.661@23.63	14635.9
	891.2245@22.4	2191.73
Glycerolipids	891.8257@29.2	31458.2
Glycerolipids	892.6928@25.44	32787.3
Glycerolipids	893.8411@30.23	17359.4
Glycerolipids	894.7085@26.33	95437.9
Glycerolipids	894.7648@28.15	9374.12
Glycerolipids	896.7242@27.34	275615
	897.7623@24.44	23495.2
	897.7643@24.44	23468.7
Glycerolipids	898.7396@28.41	396009
Glycerolipids	899.7944@26.79	68492.8
Glycerolipids	900.755@29.47	68672.5
Glycerolipids	901.8103@27.88	150350
Glycerolipids	903.826@28.95	142117
Glycerolipids	905.8419@29.96	264892
Glycerolipids	906.7653@27.88	46988.2
Glycerolipids	907.8514@30.92	40407.1
Glycerolipids	908.7812@28.95	47510.2
Glycerolipids	910.7972@29.96	69686.7
Glycerolipids	912.812@30.91	10197.4
Glycerolipids	917.8408@29.72	9602.11
Glycerophospholipids	918.6928@24.45	24323.4
Glycerolipids	918.7081@25.85	30308.2
Polyketides	919.3038@24	26468.9
Glycerolipids	919.8566@30.95	18143.6
Glycerolipids	920.7238@26.79	49829
Glycerolipids	922.7397@27.88	124987
	923.2622@14.55	6451.93
	923.7788@24.78	22947.9
Glycerolipids	924.7554@28.95	142320
Polyketides	926.1808@22.4	5670.67
Glycerolipids	929.8412@29.43	12851.2
Glycerolipids	931.8568@30.47	23103.7
Polyketides	932.2626@22.4	7887.05
sphingolipids	944.7086@24.78	22252.1
	946.213@23.28	2840.56
	946.2783@22.4	14263.7
	946.7238@25.32	7623.85
Polyketides	949.2777@22.4	3686.13
Glycerolipids	952.7864@30.48	22396.6
	962.2448@23.28	549953
	974.7551@26.81	6385.74
	993.3228@25.21	24667.6
	1000.1997@23.28	8516.03
Polyketides	1006.2811@23.28	9296.41
	1020.2971@23.28	17598.5
Polyketides	1023.2964@23.28	5217.92
	1036.2635@24.34	721515
	1053.29@24.34	396819
	1067.3416@26.74	20822.3
Fatty Acyls	1071.2997@20.33	5931.34
	1074.2184@24.34	10229.6
	1080.3004@24.34	14311.6
	1094.3155@24.34	26121.2
	1110.2814@25.68	7389.56
	1127.3087@25.69	734854
	1141.36@28.64	20815.2
	1148.2372@25.69	11230.1
Polyketides	1154.3187@25.69	16250.4
	1164.7404@2.18	2646.04
	1168.3349@25.68	31574
Polyketides	1184.3006@27.45	4373.42

## Sheet: Categories
Category	Feature	PROM G1-G5	PROM QC			Category		Percent	Percent W/UK
Fatty Acyls	100.0525@0.97	213.379	382.618			Fatty Acyls	1.02686e+06	0.0609731	0.0482178
Fatty Acyls	100.0526@4	11298.4	14377.5			Prenol Lipids	856763	0.0508731	0.0402307
	104.0736@1.03	11625.4	8671.63			Sphingolipids	44076.3	0.00261717	0.00206967
	105.058@0.98	216.336	360.829			Saccharolipids	13034.9	0.000773992	0.000612077
Fatty Acyls	110.0369@0.96	5698.37	15377.5			Glycerolipids	1.09952e+07	0.652879	0.5163
Fatty Acyls	110.1096@1.62	4663.54	2453.89			Sterol Lipids	84033.5	0.00498976	0.00394593
Fatty Acyls	120.0435@1.05	11206.8	22314.1			Glycerophospholipids	2.53308e+06	0.15041	0.118945
Fatty Acyls	128.0458@4	58521.6	74273.7			Polyketides	1.28808e+06	0.0764842	0.0604841
Fatty Acyls	128.0473@4	58780.2	74666.5			total	1.68412e+07
	129.0692@1.09	4522.67	8230.03
Fatty Acyls	129.1518@0.9	7295.36	8639.07			total2	2.12962e+07		1
	132.0699@1.06	16100	24970.6
Fatty Acyls	132.0939@1.89	9332.58	25995.3			unk	4.45507e+06		0.209195
Fatty Acyls	146.058@4	3617.75	4390.86
	148.016@1.39	8996.98	16758.9
Fatty Acyls	149.0317@1.06	24971	43884.9
	157.1581@1.08	2883.68	8727.42			Category		Percent	Percent W/UK
	165.0692@1.1	12598.3	21664.6			Fatty Acyls	1.70081e+06	0.0810099	0.185952
Fatty Acyls	172.0734@0.96	19806.4	65594.2			Prenol Lipids	1.80649e+06	0.0860438	0.0848269
	172.1006@1.06	212.397	330.049			Sphingolipids	66829.5	0.00318311	0.00313809
Fatty Acyls	188.1048@1.89	7936.71	21801.7			Saccharolipids	52603.9	0.00250554	0.0024701
Fatty Acyls	199.1939@1.41	11528	12605.2			Glycerolipids	1.12362e+07	0.535184	0.527615
	200.1072@1.1	9726.21	17999.2			Sterol Lipids	157793	0.00751572	0.00740943
	200.1079@1.07	526.464	920.501			Glycerophospholipids	2.58018e+06	0.122895	0.121156
Fatty Acyls	201.173@0.88	2677.49	9379.03			Polyketides	3.39412e+06	0.161663	0.159377
	206.0251@1.23	4111.46	4433.24			total	2.0995e+07
	206.0251@1.47	4985.14	4819.21
	206.0251@20.28	1359.48	4283.06			total total	3.01415e+07
	206.0255@17.12	1664.83	5409.3
Fatty Acyls	213.2093@1.66	4369.57	8029.82			other unk	9.1465e+06
	220.0773@17.13	4376.3	14397
	220.0773@13.82	3965.93	12326.7
	220.0773@22.4	2108.58	5953.85
	220.0774@21.58	3649.72	8987.5
	222.0563@1.9	5749.39	5715.95
	222.0566@1.23	4121.91	4387.14
	222.0566@1.47	5685.78	5644.75
	222.0566@2.65	2576.56	2815.54
Fatty Acyls	224.1363@1.1	36058.6	43495.8
Fatty Acyls	224.1427@1.1	19807.3	35406.1
Sphingolipids	227.2251@1.68	6885.83	12344
Fatty Acyls	241.2408@2	5001.65	9568.71
Fatty Acyls	254.1672@1.58	1639.02	3564.43
Fatty Acyls	255.2564@2.28	17547.7	16672.6
Fatty Acyls	256.2406@2.45	20676.5	57727.7
Fatty Acyls	257.2358@1.71	2713.17	4279.94
Fatty Acyls	257.2359@1.54	8277.65	12255.1
Fatty Acyls	258.1835@4	8618.97	10978.1
Fatty Acyls	264.2457@2.53	183558	207185
Fatty Acyls	266.2611@3.35	45896.8	77939.3
Fatty Acyls	269.2722@2.45	6737.04	11465.4
	272.1593@0.97	386.457	167.022
Sphingolipids	273.2672@1.23	2529.46	9514.27
	280.0439@1.9	5138.68	4779.69
	280.0439@10.36	4725.05	14828.7
	280.0441@1.47	5223.93	5032.11
	280.0441@20.28	6428.51	20397.4
	280.0441@22.4	1808.66	5262
	280.0443@17.12	3381.15	10883.3
	280.0443@13.82	4988.16	15801.9
	280.1024@1.03	329.346	309.953
Fatty Acyls	280.1436@1.06	6451.71	13733.6
Fatty Acyls	282.2563@2.45	18192.6	49872
	282.2876@1.11	1928.83	2169.82
Fatty Acyls	283.2874@2.94	2413.4	5149.95
Fatty Acyls	283.2875@3.23	2204.16	4281.22
Fatty Acyls	289.262@1.31	9886.07	25578.5
Saccharolipids	294.096@22.4	1215.11	3043.43
Saccharolipids	294.0965@17.13	1474.41	4744.8
Fatty Acyls	297.3035@3.36	12555.8	21231.9
Fatty Acyls	297.3036@3.96	6821.78	11656.9
Fatty Acyls	303.2542@2.53	3287.85	4115.85
Fatty Acyls	303.3047@1.05	2674.37	2684.36
Fatty Acyls	310.2877@3.35	29427.9	47715.2
Fatty Acyls	311.3189@4.08	4838.92	8972.6
Fatty Acyls	315.2048@0.97	3968.05	2780.81
Fatty Acyls	320.3082@4.86	13036.9	46159.2
Fatty Acyls	320.3085@4.64	91210.5	145987
Fatty Acyls	325.3349@4.84	9509.85	17951.5
Glycerolipids	330.2775@2.45	29991.8	92329.4
Fatty Acyls	336.194@1.89	4445.02	12210.1
Fatty Acyls	337.335@4.86	12827	45988.5
Fatty Acyls	339.35@6.32	2566.25	4908.99
	340.0109@20.28	2308.6	7132.87
	340.0111@17.12	3954.27	12591.7
Fatty Acyls	353.366@7.6	4923.09	8557.59
Fatty Acyls	353.3662@6.5	5528.99	9196.49
	354.0628@20.28	5345.96	17592
	354.0629@13.82	16666	53895.8
	354.0629@2.65	3402.38	3656.33
	354.063@22.4	5155.83	15096.2
	354.063@17.12	9329.35	30253.2
	354.0631@21.58	11100.5	32256.3
	354.0631@24.34	1308.97	3269.93
Fatty Acyls	356.274@2.45	4179.48	10529.3
Glycerolipids	358.3087@3.35	89035.2	159064
	362.3033@1.92	390.487	1518.93
Fatty Acyls	367.3816@7.79	2475.32	4025.61
Fatty Acyls	367.3817@8.61	9470.22	18054.8
	370.0942@2.65	8079.64	8496.1
	370.0943@3.9	3631.77	4125.76
Fatty Acyls	370.3089@4	54318.5	70142.4
	381.3974@9.14	5788.34	10554.9
Glycerophospholipids	386.1791@1.03	17034.6	15908.8
	393.3401@7.98	88905.8	113607
Fatty Acyls	408.2646@4	6640.02	8381.45
	412.1758@1.03	4384.28	4008.94
	414.0295@10.36	2515.42	7775.46
	414.0296@20.28	1988.87	6047.93
	414.0297@13.82	2620.28	8105.24
Fatty Acyls	414.2037@1.06	74930.7	147561
Fatty Acyls	426.2985@1.54	4789.98	21230.6
	428.0817@20.28	8227.08	26395.4
	428.0819@21.58	4203.71	11669.4
	428.0819@22.4	6548.74	19207.3
	428.082@17.13	17735.1	59149.8
	428.082@24.34	1278.75	3731.68
	428.0821@23.28	3213.18	9364.09
Sterol Lipids	430.3121@23.36	43184.6	40211.6
	440.2079@1.06	13769.4	27473.6
Sterol Lipids	444.3266@2.45	32655.9	92371.9
Fatty Acyls	452.1669@1.06	3392.09	6339.8
	452.2119@2.84	7597.68	8921.47
	470.3246@1.53	6989.27	30973.7
Prenol Lipids	472.3579@3.35	75009.5	121757
Sterol Lipids	482.2823@2.45	2597.01	6816.42
Glycerophospholipids	484.283@1.89	43518	125208
Sterol Lipids	484.3531@0.98	5205.44	17229.1
	488.0483@17.12	2226.78	6796.84
	488.0486@13.81	2924.23	9079.1
	502.1003@22.4	1873.87	5483.77
	502.1004@20.28	13765.8	45048
	502.1004@10.36	5875.39	18470.4
	502.1006@23.28	3060.97	8919.83
	502.1007@21.58	4994.1	14806.2
	502.1016@24.34	3175.11	8766.43
	505.3601@2.45	3387.76	9020.57
Polyketides	510.2795@1.89	9056.86	25010
	514.351@1.51	10569.5	46015.2
Polyketides	518.1319@10.36	37754.9	124927
Polyketides	521.1303@10.36	3844.21	11997.4
Glycerophospholipids	522.2387@1.89	1635.62	4575.32
	523.5693@17.11	4768.72	11080.1
Glycerophospholipids	530.2669@1.94	5561.67	1829.97
	530.3474@2.45	955.315	1845.56
	535.5695@20.52	1672.88	3605.48
	536.5284@12.47	5557.28	16123.3
	551.6009@19.81	25245.2	59799.1
	553.1688@2.65	2858.74	2980.97
	558.377@1.49	11318.7	48983
Polyketides	562.067@17.12	1585.26	4940.08
Polyketides	562.0671@20.28	1131.86	3194.45
	562.5439@2.53	22786.1	27522.2
	564.5594@15.19	7994.84	21109
	576.1193@21.58	6448.02	18813.8
	576.1193@13.81	9126.18	29400.1
	576.1194@22.4	1962.18	5527.11
	576.1196@24.33	1026	2611.28
Fatty Acyls	576.5121@28.41	11136.4	11750.7
Glycerolipids	578.5279@18.98	37721.9	137226
	579.1177@13.82	1355.62	4166.92
	579.6324@21.3	18719.4	44094.8
	592.1505@13.82	1868.91	5583.12
Glycerolipids	596.5383@18.97	21937.3	78154.3
Prenol Lipids	598.3841@1.05	3932.32	2272.18
	600.3109@2.08	503.652	493.833
Saccharolipids	602.4033@1.47	10345.4	44815.7
Glycerolipids	604.5434@29.96	6845.17	7557.88
Glycerophospholipids	606.3839@16.02	16098.2	21578.9
Glycerophospholipids	606.4628@16.24	3463.29	8600.7
Glycerolipids	606.5594@20.89	177500	219341
	607.6636@22.13	49158.6	116211
Polyketides	609.1772@13.82	212886	696953
Polyketides	614.1737@13.82	1922.93	6014.85
Sterol Lipids	617.3928@1.89	390.579	1163.88
	627.1875@3.9	6867.84	7620.05
Glycerophospholipids	634.4941@18.98	6997.85	24228.4
	635.6944@22.95	7465.63	16690
Glycerolipids	641.5964@20.89	18550.2	81615.5
	646.4292@1.46	8160.74	35917.1
Glycerophospholipids	646.452@21.33	234890	16185.1
Glycerophospholipids	648.5094@22.34	16126.3	13631.5
	650.1378@22.4	3185.6	8969.07
	650.1379@17.12	7809.84	24866.2
Glycerophospholipids	652.434@6.58	3647.42	5347.19
	653.1361@17.12	1466.23	4527.1
Glycerolipids	655.575@20.89	74808.4	57871.3
Glycerophospholipids	662.4467@16.03	701409	851125
	663.7258@23.87	9285.86	20885.9
	666.1693@17.12	1613.06	5074.04
Glycerolipids	668.5407@2.45	8835.42	68934.7
	674.6692@4.64	7799.03	11063.8
Glycerophospholipids	680.4132@21.33	16130	3301
Glycerolipids	682.5939@23.36	1.77139e+06	1.71173e+06
	683.196@17.12	389104	1.15606e+06
Glycerolipids	683.6066@21.76	90617.7	76822.8
	689.1913@17.12	1479.5	4798.6
	697.2482@21.11	56637.4	54691
Glycerolipids	698.5885@21.51	131072	118470
Glycerophospholipids	700.4025@16.02	31565.6	41304.8
	701.2066@5.77	6957.63	8320.68
Polyketides	704.125@17.12	940.952	2996.4
Glycerophospholipids	704.5358@21.77	57597.5	55261.4
Glycerophospholipids	706.4841@16.02	18718.5	24853.2
Glycerophospholipids	707.482@1.44	5629.06	25549.6
Glycerolipids	707.6066@21.53	23187	19848.1
Glycerolipids	709.6217@22.04	56211.4	52702
Glycerolipids	711.6378@22.54	59290.4	59730.6
Glycerophospholipids	716.5194@2.45	2314.24	11295.3
Glycerophospholipids	720.4997@16.02	22853.4	29741.3
Glycerophospholipids	720.5501@23.36	424869	406881
Polyketides	724.1565@20.28	5418.99	16639.3
Glycerolipids	724.6035@3.35	31650	90807.6
Glycerophospholipids	730.5509@22.03	28438.1	27461.9
Glycerophospholipids	732.5662@22.51	37489.6	33960.3
Glycerophospholipids	735.5356@16.02	4492.91	5809.69
Glycerophospholipids	736.5443@21.52	35685.6	34600.8
Glycerophospholipids	736.5445@23.36	59927.4	56694.2
Glycerolipids	737.6532@22.75	42821.3	42496.3
Glycerolipids	739.6692@23.35	106955	97215.4
Polyketides	740.1883@20.28	470615	1.17765e+06
Glycerophospholipids	749.515@16.02	7441.34	9518.35
Glycerophospholipids	751.5077@1.41	3413.86	16559.4
Glycerophospholipids	756.5674@22.27	7818.79	6927.48
Polyketides	757.2151@20.28	445590	1.11202e+06
Prenol Lipids	758.2157@20.28	254984	691244
Glycerophospholipids	758.5821@22.75	21243.3	20597.4
Glycerophospholipids	760.5982@23.21	31687.5	30750.1
Polyketides	763.2101@20.28	2718.11	8481.76
Glycerophospholipids	763.531@16.02	2168.38	2729.05
Sphingolipids	767.6267@3.35	8769.54	17046.5
Glycerolipids	767.7006@24.07	85172	82304.1
	771.2668@22.09	34087.3	33328.7
Glycerophospholipids	772.5985@23.08	10875.4	10485.1
Glycerophospholipids	774.6139@23.59	15239.5	14711.1
	775.225@8.29	6107.97	7552.06
Polyketides	778.1436@20.28	2220.69	6675.69
Sphingolipids	779.5611@16.02	3639.31	4884.59
Glycerolipids	779.7006@23.97	61152.8	55518.8
Glycerolipids	781.7161@24.53	64491.8	62638.6
Polyketides	784.2256@20.28	4044.5	11735.5
Glycerophospholipids	784.5985@23.03	14617.2	13839
Glycerophospholipids	786.614@23.52	37294.4	36775.7
Glycerophospholipids	788.6297@24.08	50265.7	49264.6
Glycerophospholipids	789.5469@16.02	3379.67	4298.28
Glycerophospholipids	790.4915@16.02	16283.3	21893.6
Glycerolipids	791.7006@23.91	70892.3	63839.4
Glycerolipids	793.7169@24.46	144742	139122
Glycerolipids	795.732@25.1	136188	135953
	798.241@20.28	1587.99	4203.45
Glycerolipids	798.6719@24.47	42224.2	39742.8
Glycerolipids	799.6166@2.45	1625.89	10589.5
Glycerophospholipids	800.6297@23.96	38079.2	37076.8
Glycerolipids	800.687@25.1	36683.4	35030.6
Glycerophospholipids	802.6453@24.53	40302.3	38509.5
Glycerolipids	805.7163@24.39	60589.2	56716.4
Glycerolipids	807.7322@24.98	113958	112834
Glycerolipids	809.7475@25.64	89746.8	84410
Glycerophospholipids	812.6297@23.91	43861	44460
	814.2068@21.58	492257	927049
Glycerophospholipids	814.6462@24.46	92600.7	88040.7
Glycerolipids	814.7022@25.69	24843.7	21855.4
Glycerophospholipids	816.6608@25.1	84209.4	83075.9
Glycerolipids	817.716@24.29	38933	35923.7
Glycerolipids	819.7325@24.91	147324	145257
Glycerolipids	821.7478@25.51	229822	220892
Glycerolipids	823.7635@26.35	184687	186361
Glycerophospholipids	824.6299@23.82	8353.87	7509.53
Glycerolipids	824.6878@24.91	43210.2	41733.4
Glycerophospholipids	826.6457@24.39	41086.9	38494.7
Glycerophospholipids	828.6616@24.98	74630.5	68972.3
Glycerolipids	828.7185@26.33	46473.9	45909.1
Glycerolipids	830.6768@25.67	57998.8	53779.8
Glycerolipids	833.7474@25.43	72771.8	73461.4
Glycerophospholipids	834.4989@16.02	2559.88	3288.32
Glycerolipids	835.7631@26.14	110422	112471
Glycerolipids	837.7787@27.06	61264.9	60385.8
Glycerophospholipids	838.6456@24.3	26818.3	25795.9
Glycerolipids	838.7031@25.43	23652.5	22301.2
Glycerolipids	840.6622@24.91	95077.3	93273.7
Glycerolipids	840.7183@26.14	31146.5	28052.2
Glycerophospholipids	841.7@22.87	10886.1	11349.1
Glycerolipids	842.6771@25.52	154829	145131
Glycerolipids	842.734@27.06	15350.8	15768.9
Glycerolipids	844.6928@26.35	118068	111272
	845.2853@23	29967.7	29649
Glycerolipids	845.7474@25.34	70103.2	68380.1
Glycerolipids	847.7636@25.91	218534	216712
	849.2435@11.31	7171.23	8842.93
Glycerolipids	849.7792@26.83	525620	527796
Glycerolipids	851.7948@27.87	114976	120586
Fatty Acyls	852.1624@21.58	4375.05	12139.4
Glycerolipids	852.661@24.79	17533.9	16523.5
Glycerolipids	852.7185@25.92	65152.5	63226.1
Glycerolipids	854.6774@25.43	55952.6	48713.7
Glycerolipids	854.7345@26.83	135651	132265
Glycerolipids	856.6925@26.14	77274.7	72674.4
prenol Lipids	858.2442@21.58	7454.35	19662
Glycerolipids	858.708@27.06	38536.3	37515.1
Glycerolipids	861.779@26.62	54548.3	54680.3
Glycerophospholipids	862.6296@22.86	10530.1	10276.4
Glycerolipids	863.7948@27.59	67960.8	66591.3
Glycerolipids	865.8098@28.67	28557.9	28831.2
Glycerolipids	866.6768@25.35	48334.9	46229.7
Glycerolipids	868.6928@25.92	151940	147659
Glycerolipids	870.7085@26.83	324969	311592
Glycerolipids	871.7633@25.44	42310.8	37793.3
Polyketides	872.2597@21.58	9502.1	24680.3
Glycerolipids	872.7237@27.87	83912.2	83791.2
Glycerolipids	873.7789@26.32	125827	126003
	874.7797@26.32	49603.9	53588.2
Glycerolipids	875.7948@27.34	376315	358561
Glycerolipids	877.8105@28.41	529777	540007
Glycerolipids	878.7344@26.32	38984.4	38343
Glycerolipids	879.8258@29.46	69912	67356.6
Glycerolipids	880.6924@25.93	16908.7	15664.4
Glycerolipids	880.7501@27.34	109557	104593
Glycerophospholipids	881.5623@1.48	2383.42	2195.26
Glycerolipids	882.7081@26.61	40138.7	39307.9
Glycerolipids	882.7658@28.41	140069	139930
Glycerolipids	884.7237@27.6	55041.7	50736.2
prenol Lipids	888.2257@22.4	515383	971558
Glycerolipids	889.8101@28.15	28183.6	29380.9
Glycerophospholipids	890.661@23.63	14635.9	13541.7
	891.2245@22.4	2191.73	5973.65
Glycerolipids	891.8257@29.2	31458.2	30921
Glycerolipids	892.6928@25.44	32787.3	31766.9
Glycerolipids	893.8411@30.23	17359.4	17768.7
Glycerolipids	894.7085@26.33	95437.9	90914.8
Glycerolipids	894.7648@28.15	9374.12	9348.36
Glycerolipids	896.7242@27.34	275615	261484
	897.7623@24.44	23495.2	23001
	897.7643@24.44	23468.7	20617.9
Glycerolipids	898.7396@28.41	396009	392639
Glycerolipids	899.7944@26.79	68492.8	68975.5
Glycerolipids	900.755@29.47	68672.5	66483.9
Glycerolipids	901.8103@27.88	150350	153760
Glycerolipids	903.826@28.95	142117	145947
Glycerolipids	905.8419@29.96	264892	272192
Glycerolipids	906.7653@27.88	46988.2	46210.9
Glycerolipids	907.8514@30.92	40407.1	41873.5
Glycerolipids	908.7812@28.95	47510.2	46389.4
Glycerolipids	910.7972@29.96	69686.7	68415.1
Glycerolipids	912.812@30.91	10197.4	9958.16
Glycerolipids	917.8408@29.72	9602.11	10453.8
Glycerophospholipids	918.6928@24.45	24323.4	24308.8
Glycerolipids	918.7081@25.85	30308.2	29510.1
Polyketides	919.3038@24	26468.9	26378.4
Glycerolipids	919.8566@30.95	18143.6	18367.7
Glycerolipids	920.7238@26.79	49829	47314.2
Glycerolipids	922.7397@27.88	124987	124117
	923.2622@14.55	6451.93	8033.02
	923.7788@24.78	22947.9	22946.1
Glycerolipids	924.7554@28.95	142320	140697
Polyketides	926.1808@22.4	5670.67	15759.7
Glycerolipids	929.8412@29.43	12851.2	12184.5
Glycerolipids	931.8568@30.47	23103.7	23318.7
Polyketides	932.2626@22.4	7887.05	20601.6
sphingolipids	944.7086@24.78	22252.1	23040.1
	946.213@23.28	2840.56	7554.72
	946.2783@22.4	14263.7	35608
	946.7238@25.32	7623.85	7030.84
Polyketides	949.2777@22.4	3686.13	8815.3
Glycerolipids	952.7864@30.48	22396.6	19305.5
	962.2448@23.28	549953	1.07685e+06
	974.7551@26.81	6385.74	5679.43
	993.3228@25.21	24667.6	24671
	1000.1997@23.28	8516.03	23855.5
Polyketides	1006.2811@23.28	9296.41	23855.9
	1020.2971@23.28	17598.5	42913.9
Polyketides	1023.2964@23.28	5217.92	12218.8
	1036.2635@24.34	721515	1.5481e+06
	1053.29@24.34	396819	810934
	1067.3416@26.74	20822.3	20692
Fatty Acyls	1071.2997@20.33	5931.34	7215.06
	1074.2184@24.34	10229.6	28997.4
	1080.3004@24.34	14311.6	36081.4
	1094.3155@24.34	26121.2	61921.1
	1110.2814@25.68	7389.56	20046.6
	1127.3087@25.69	734854	1.71935e+06
	1141.36@28.64	20815.2	20658.3
	1148.2372@25.69	11230.1	32748.9
Polyketides	1154.3187@25.69	16250.4	41101.3
	1164.7404@2.18	2646.04	2571.71
	1168.3349@25.68	31574	73791.3
Polyketides	1184.3006@27.45	4373.42	11471.7
