# Supplementary material for: Enhanced Outer Membrane Vesicle Production in Escherichia coli: from Metabolic Network Model to Designed Strain Lipidomic Profile
Source: Preprints.org preprint supplement (doi:10.20944/preprints202409.1980.v1), 2024-09-25
Supplement: Supplementary file 1 [file supplementary › Table 3.XLSX]

## Sheet: S3_Lipidomics_Fold_change
	MOLECULAR FEATURES		JC8031			ΔgmhA			ΔsgbE			ΔallD			ΔpoxB			QC										Fold Change
	[M+H]	Feature	JC8031-001	JC8031-002	JC8031-003	ΔgmhA-004	ΔgmhA-005	ΔgmhA-006	ΔsgbE-007	ΔsgbE-008	ΔsgbE-009	ΔallD-010	ΔallD-011	ΔallD-012	ΔpoxB-013	ΔpoxB-014	ΔpoxB-015	QC-001	QC-002	QC-003	QC-004	QC-005	QC-006	QC-007	QC-008	QC-009	CV in QCs (%)	ΔgmhA vs JC8031	ΔsgbE vs JC8031	ΔallD vs JC8031	ΔpoxB vs JC8031
	101.06	100,0525@0,97	261.875	353.902	160.234	372.581	191.39	192.003	285.488	186.579	145.942	214.012	182.428	75.7524	169.166	214.531	194.803	406.929	375.945	409.407	433.608	404.021	314.278	395.527	288.539	415.312	12.7931	-1.0265	-1.25566	-1.64342	-1.34142
	101.061	100,0526@4	10892.5	15663.7	8471.9	14422.6	14725.7	15069.5	11495.6	11727.5	11020.8	11909.3	11218	137.084	10996.9	11240.6	10484.8	14293.9	14696.8	14418.6	14856.8	15253.5	14004.7	13857.7	14007.2	14008.2	3.29044	1.26235	-1.0229	-1.50565	-1.07046
	105.082	104,0736@1,03	1985.23	18464.5	12310	13129.7	8802.77	8658.71	20454.5	19297.3	17642.7	12296.3	6578.78	9.68014	12535.3	10789.2	11427	9588.4	5105.42	10029.9	10039.3	7378.22	9023	8619.1	9193.98	9067.34	18.0052	-1.07089	1.75198	-1.73472	1.0608
	106.066	105,058@0,98	93.5794	177.455	146.113	521.67	468.623	275.801	239.218	138.215	241.92	162.688	269.829	85.9782	143.41	150.241	130.301	340.779	443.656	311.284	469.634	324.517	324.46	307.823	328.907	396.4	16.7694	3.03512	1.48473	1.24295	1.01631
	111.045	110,0369@0,96	7626.78	12555.6	4729.08	11233.3	5489.93	6041.24	9312.89	3538.8	3149.05	4082.37	2895.01	101.037	3513.67	6090.16	5116.65	15277.9	17564	15785.4	15608.8	15929.7	14413.7	14322.5	14599.9	14895.3	6.58178	-1.09431	-1.55689	-3.51936	-1.6923
	111.118	110,1096@1,62	5032.43	8682.06	3328.08	5606.24	4714.59	5077.87	5832.41	4794.36	4577.08	4071.73	6927.82	139.213	3807	5324.53	2037.71	2103.62	2659.32	2698.36	2874.93	2588.83	2381.26	2677.3	1876.97	2224.4	13.3677	-1.10675	-1.12094	-1.53002	-1.52585
	121.051	120,0435@1,05	459.543	6332.86	10421.3	5033.9	4518.17	3215.19	26414.8	27266.1	15771.2	15328.9	12006.3	130.579	21228.8	10110	9863.85	23570	17970.5	24819	25114.5	15442.3	23725.5	23509.4	23234.3	23441.7	14.8059	-1.34827	4.03471	1.59558	2.3936
	129.054	128,0458@4	55709.9	80502.7	43697.3	76920.1	74048	78568.7	60512.4	59666.7	57777.2	60558.8	59073.1	393.182	57748.5	57144	55504	73662.1	75979	75734.7	73188.5	79319.8	72152.4	71727.1	72854.7	73845	3.20171	1.27584	-1.01098	-1.49894	-1.05583
	129.055	128,0473@4	56352.6	81862.3	43758.9	76691.8	74410.4	78633	60525.3	59701.2	57703.5	60631.9	59100.3	628.185	58800.9	57346.4	55555.7	73652.3	75944	75970.3	75986	79432	72284.3	72045	72801.3	73883.1	3.1923	1.26246	-1.02273	-1.51191	-1.05982
	130.077	129,0692@1,09	921.639	5548.44	3587.94	2377.17	3227.88	2333.61	3722.69	4389.34	3888.62	4370.01	4275.99	183.661	16696.8	5004.19	7312.11	8077.95	6828.03	6534.78	9374.78	7679.43	7891.69	9562.01	9090.91	9030.64	13.4118	-1.26697	1.19314	-1.13912	2.88457
	130.16	129,1518@0,9	6126.73	8439.06	5590.9	9351.18	9598.09	8193.71	9396.35	6985.58	6813.51	7100.62	11234.1	20.9144	8060.96	6938.45	5580.27	8229.73	9349.22	9223.66	8486.59	9193.55	8378.32	8109.55	8068.81	8712.23	5.82118	1.3466	1.15076	-1.09812	1.02098
	133.078	132,0699@1,06	5419.49	24333.6	10805.1	14406.5	14211.6	10925	21775	17852.9	18986.6	20174.5	21592.1	155.205	22686.5	18614.4	19561.9	23895.6	23487.9	24195.7	26710	22693.3	25454.1	26710	25098.3	26490.7	5.96561	-1.02567	1.44519	1.03362	1.50063
	133.102	132,0939@1,89	7275.45	16027.1	8382.12	9666.69	7959.8	32792.4	10161.2	7182.63	8380.99	7797.2	5382.49	89.4864	6043.83	6540.16	6307.17	26284.1	26343.4	25989.2	26419.8	27135.8	25871.3	24486.6	25598.2	25829.1	2.77481	1.59127	-1.23168	-2.38784	-1.67722
	147.066	146,058@4	3632.62	4900.63	2565.93	4645.63	4748.72	5104.6	3597.03	3607.26	3349.92	3637.4	3655.58	185.89	3720.07	3559.51	3355.49	4249.32	4526.28	4407.87	4573.75	4505.28	4493.59	4028.08	4311.15	4422.43	3.901	1.30631	-1.05163	-1.48407	-1.04364
	149.024	148,016@1,39	8980.56	16448.8	5420.57	15645.9	7340.27	11921	10835.2	8067.52	11452.5	3585.6	8810.9	525.844	6746.32	11476.3	7697.4	15799.7	19494.2	20264	15511.1	15703.7	16679.5	15661.2	15097.6	16619.1	11.0326	1.13152	-1.0163	-2.38733	-1.1902
	150.04	149,0317@1,06	1472.57	16186.6	18655.3	10054.5	9728.88	5210.83	51644.8	55755	33787.5	46208.6	37221.2	86.1822	45868.1	18401.9	24282.2	46329.9	36425	47470.3	47208.6	31677.9	46745	46429.4	46216.7	46461.1	13.0222	-1.45292	3.88791	2.2998	2.43848
	158.166	157,1581@1,08	753.982	6094.9	3849.11	2256.4	2964.87	1439.07	3969.04	3350.25	3385.01	3327.43	4265.19	40.2625	3099.67	2728.56	1731.49	8542.15	8579.97	8775.32	9537.46	7553.74	9150.5	8851.35	8616.24	8940.04	6.20219	-1.60622	1.00059	-1.40157	-1.41513
	166.077	165,0692@1,1	3840.82	20833.7	11795.2	10146.1	11643.3	6848.15	15917	14874	16464.4	16933.5	16767	61.4117	15424.8	13747.7	13677.9	20094.4	22414.8	20390.9	24186	21088.3	20860.4	21402.3	21284.2	23259.5	6.26637	-1.27349	1.29574	-1.0802	1.17496
	173.081	172,0734@0,96	25359.8	44078.1	15857.5	43507.1	19036.6	17418.2	36022.8	12139.6	6963.82	13553.7	9897.48	851.142	12126.5	22184.9	18098.8	65175.7	71790.9	66996.7	67367.3	68814.5	61584.3	61555.2	63085.4	63977.7	5.26335	-1.0667	-1.54727	-3.50977	-1.62746
	173.108	172,1006@1,06	69.8704	312.973	140.492	255.998	205.542	196.956	300.218	209.716	269.154	243.689	203.143	9.34002	311.913	209.631	247.325	289.02	331.331	318.738	301.325	330.604	361.95	443.502	265.762	328.206	15.3986	1.25827	1.4887	-1.14723	1.46917
	189.113	188,1048@1,89	6516.47	13931.4	6868.07	8139.16	6901.67	27976.4	8637.45	5957.36	6715.18	6750.45	4956.11	70.1552	5145.25	5325.9	5159.65	21749.3	21997.5	21935.4	22649.1	23393.6	20807	21074.5	21013.2	21595.3	3.80109	1.57481	-1.28184	-2.31948	-1.74757
	200.202	199,1939@1,41	10755.1	15654.7	8593.58	15703.2	15328.6	15811	11811.5	10735.9	11699.9	11565.6	12327.4	234.096	11155.9	11489.7	10054	12692.9	12590.8	12884	13044.6	13627.2	12269.2	12050.4	12106.7	12181.2	4.13372	1.33824	-1.02208	-1.45079	-1.07045
	201.115	200,1072@1,1	3173.8	15039.1	9609.37	6326.57	9441.39	5787.23	11992.5	13301	11915.7	12587.8	13477.4	106.126	12569.5	10726.1	9839.53	18069.2	18368	17143.6	19085.3	16794.6	17594.6	19297.2	17839.7	17800.6	4.57169	-1.29075	1.33739	-1.06309	1.19095
	201.116	200,1079@1,07	389.078	878.823	251.045	495.405	509.201	478.655	650.919	531.558	723.254	638.315	520.708	13.9961	562.228	725.209	528.56	861.14	990.979	952.096	987.183	961.856	857.538	800.179	867.952	1005.58	8.06476	-1.02406	1.25464	-1.2949	1.19556
	202.181	201,173@0,88	673.914	574.218	595.284	1181.51	1055.06	920.633	12701.6	3718.25	6738.58	2435.83	4519.84	26.1531	2248.07	1046.25	1727.22	9384.63	9507.47	9220.28	9601.54	9644.01	9249.56	9443.17	9119.13	9241.48	1.95437	1.71269	12.5628	3.78744	2.72404
	207.033	206,0251@1,23	5260.06	4249.4	2061.55	3603.18	6645.71	4181.12	4515.19	2860.35	3355.36	2769.7	4905.21	2015.26	4676.93	4742.54	5830.38	4280.23	4013.44	4223.02	5505.38	3427.97	4961.48	3712.95	5827.74	3947	18.5028	1.24708	-1.07829	-1.1941	1.31794
	207.033	206,0251@1,47	6343.42	4272.6	2501.27	4547.44	8919.54	5224.46	5762.83	3163.43	3810.14	3531.88	6337.11	2891.28	5667.57	5313.04	6491.06	4537.98	4197.08	4787.77	4905.34	4082.81	5775.58	4251.42	6793.91	4041.03	19.0728	1.42495	-1.02991	-1.02798	1.33196
	207.033	206,0251@20,28	2358.4	2171.59	688.367	1471.42	387.98	2997.43	1616.36	1532.85	1297.46	1011.57	1085.33	322.508	939.887	1939.79	571.204	4187.52	4187.39	4487.03	4383.58	4592.37	4039.6	4162.85	4252.07	4255.11	4.05342	-1.07444	-1.17354	-2.15688	-1.51218
	207.033	206,0255@17,12	2869.28	2827.19	938.217	1694.09	486.829	3913.71	2075.88	1589.36	1726.74	1216.73	1417.42	265.086	1115.81	2182.71	653.447	5347.88	5426.98	5317.06	5647.28	6437.84	4888.67	5156.67	5344.41	5116.88	8.14185	-1.08861	-1.23047	-2.28842	-1.67883
	214.217	213,2093@1,66	4292.22	6475.31	3593.64	6495.42	4540.76	6577.55	5281.78	4068.27	4765.89	3150.65	3779.43	22.3342	4083.85	4926.98	3489.52	7990.48	7724.2	8226.44	8408.47	8744.8	7800.84	7591.24	7814.87	7967.04	4.58232	1.22648	-1.01737	-2.06564	-1.14886
	221.085	220,0773@17,13	7593.66	7286.15	2436.52	4770.25	1404.27	9520.37	5328.19	4196.92	4734.3	3584.04	3525.31	236.943	3002.57	6204.07	1820.93	14441.9	14657.6	14465.6	15159.4	15069.7	13897	14007.3	13539.8	14334.2	3.68277	-1.10331	-1.21438	-2.35715	-1.57028
	221.085	220,0773@13,82	6252.95	7110.71	2330.5	4375.16	2058.22	8880.25	4801.37	3916.29	4108.44	3196.99	2786.35	59.8376	3062.82	4856.07	1693	12238.5	12450.1	12231.2	12789.7	13234.8	12195.9	12209.3	11607.7	11983.4	3.78	-1.02485	-1.22361	-2.597	-1.63279
	221.085	220,0773@22,4	4175.7	3446.5	1025.79	2217.81	1503.34	3858.39	2577.45	2090.28	1977.07	1729.65	1836.22	264.571	1382.15	2828.59	715.176	5785.69	6019.04	5864.13	6526.61	6214.23	5835.21	5706.07	5919.68	5713.94	4.48571	-1.14096	-1.30147	-2.2577	-1.75561
	221.085	220,0774@21,58	5434.16	4700.19	2005.8	3316.45	2182.16	6995.44	4943.02	3774.71	3601.64	4102.92	3543.48	500.319	3556.82	3159.39	2929.28	9201.34	9521.3	5578.47	9993.17	11352.1	8933.98	8766.2	10569.4	6971.64	19.7369	1.02915	1.01476	-1.49019	-1.25864
	223.064	222,0563@1,9	7427.78	5166.78	2895.22	5071.17	11258.4	5207.97	6051.04	3985.73	4269.55	4572.77	6975.92	2841.49	7493.49	6201.67	6821.87	6056.82	5473.55	5299.42	6070.18	4454.39	6442.81	4871.53	7273.68	5501.18	14.87	1.39044	-1.08272	-1.07641	1.32455
	223.065	222,0566@1,23	5958.97	3421.4	2305.06	3303.36	6745.45	4112.76	5068.65	2997.14	3136.11	2646.13	5153.91	2110.64	5300.52	4198.5	5370.09	4723.93	3924.66	4165.5	4637.79	3445.02	5028.63	3855.49	5666.78	4036.48	15.6713	1.2119	-1.04316	-1.17907	1.27245
	223.065	222,0566@1,47	7955.95	4961.8	3006.81	4337.16	10644.2	5886.28	6003.41	3965.54	4042.67	3633.22	7483.25	3093.06	7160.23	5978.15	7134.91	5886.24	4710.9	5484.44	5623.93	4344.52	6464.99	5069.47	7859.61	5358.65	18.4088	1.3104	-1.13653	-1.1207	1.27308
	223.065	222,0566@2,65	3264.76	2399.31	1328.64	2225.57	5342.83	2560.13	2404	1822.51	2118.45	1835.28	3078.71	1464.06	3623.86	2699.8	2480.46	3015.15	2445.18	2597.35	3222.65	2132.08	3414.49	2488.44	3669.79	2354.7	18.8999	1.44844	-1.10209	-1.09637	1.25904
	225.144	224,1363@1,1	35958.5	50600.2	26537.4	45912.5	43558.9	45216.3	37883	35748.3	36212.4	38815.8	37275.5	73.7219	36057.3	36534.7	34493.8	43562.8	44170.1	44601.5	45198.3	45650.7	42472	42229.2	40914.7	42662.4	3.56475	1.19091	-1.02961	-1.48488	-1.05613
	225.151	224,1427@1,1	9052	32240	18181	15778.5	21610.4	10602.5	25397.1	23704.9	24263.9	23245.8	28153.9	8.89583	23144.2	20776.7	20949.3	33732.4	34584.2	34683.1	39126.4	31938.1	36218.8	36211.1	35695.8	36465.2	5.68231	-1.23924	1.2336	-1.15687	1.09075
	228.233	227,2251@1,68	6632.33	10415.9	5422.36	10412.9	7755.86	10610.2	8095.64	6055.88	7628.72	5040.22	5439.48	146.344	6076.18	8055.38	5500.24	12535.6	12422.9	12251.4	12165	13455.4	11951.6	12196.5	11964.3	12153.4	3.70684	1.28074	-1.03169	-2.11467	-1.1446
	242.249	241,2408@2	4924.11	7993.24	4268	6779.05	4774.94	7694.53	5556.63	4723.59	5187.21	3423.65	3963.47	115.199	5456.89	6063.37	4100.8	9547.88	9183.03	9024.23	9837.03	10209.1	9468.51	9274.97	9758.82	9814.82	3.91156	1.12005	-1.11107	-2.29067	-1.10014
	255.175	254,1672@1,58	3466.75	2110.43	681.013	575.221	2857.15	3850.02	1389.87	2297.42	1688.88	1180.48	719.28	61.8306	801.445	2503.78	401.746	3642.03	3633.38	3635.58	3739.75	3538.65	3494.09	3472.57	3420.53	3503.27	2.89307	1.16366	-1.16406	-3.19036	-1.68823
	256.264	255,2564@2,28	16020.6	22379.2	10884.7	20580.4	16618.9	18572.2	20251.8	13297.3	29345.6	13697.1	15226.8	410.895	12770.3	39896.7	13262.3	16088.1	17058.8	17172.6	17690.4	17888.8	15981.5	16018.1	16176.2	15978.7	4.68915	1.13163	1.27616	-1.68007	1.33773
	257.248	256,2406@2,45	16993.1	28611	25824.7	19571.4	25777.6	25856	15655.4	23030.3	32260.9	18492.3	23309.7	429.314	19085	18643.4	16607	56915	57293.9	59691.6	60192.9	62100.6	54493.3	55779.5	55486.4	57595.9	4.29601	-1.00314	-1.0068	-1.69137	-1.31459
	258.244	257,2358@1,71	2284.94	3948.54	2222.61	4062.66	3055.6	4160.6	3263.89	2603.41	2873.86	2063.06	2119.79	382.869	2589.59	2933.57	2132.54	4185.67	4359.28	4182.57	4828.81	4497.7	4379.35	3941.67	4085.29	4059.16	6.31432	1.33382	1.03371	-1.85208	-1.10455
	258.244	257,2359@1,54	7231.01	11796.2	8092.41	10527.1	8675.25	16042.9	8901.09	7029.2	9011.55	6288.02	7018.43	270.081	7164.41	10011	6106.04	11861.8	12583.7	12465.9	12988.5	13035.3	11961.1	11366.4	11655.6	12377.4	4.74417	1.29962	-1.08732	-1.99754	-1.16486
	259.191	258,1835@4	8275.37	11966.5	6456.35	11145.8	11020.5	11281.4	8948.46	8885.12	8403.36	9106.31	8488.45	75.9577	8691.45	8811.76	7727.77	10865	11496.9	11040.5	11038.9	11922.2	10529.8	10739.5	10358.7	10811.2	4.38078	1.25281	-1.01758	-1.51087	-1.05815
	265.254	264,2457@2,53	176469	248710	133695	242973	223750	242153	186728	175240	192194	186527	183247	1164.71	172653	219140	168726	206231	208359	211015	213124	218165	201898	199880	202127	203865	2.90955	1.2684	-1.00851	-1.50665	1.00294
	267.269	266,2611@3,35	45415.5	88181.4	31815.8	51194	50523.2	71536.6	44702.5	39037.9	46026.7	49536.8	36251.8	435.093	43294.9	46987.3	43513	77583.4	76464.1	78736.3	81405.2	84387.8	75692	75453.7	75297.8	76433.4	3.98074	1.0474	-1.27469	-1.91841	-1.23631
	270.28	269,2722@2,45	6051.78	9326.9	5279.09	9731.69	7368.31	11615.3	9858.95	5775.86	7067.37	4713.14	5628.04	150.852	6221.43	7001.37	5265.51	11781.4	11893.1	11461.5	12266.3	11872.8	11222.6	11196.3	10783.7	10710.8	4.63147	1.39005	1.09897	-1.9689	-1.11734
	273.167	272,1593@0,97	472.562	816.606	297.179	710.76	537.703	302.509	185.661	213.404	792.366	406.501	116.889	29.8666	139.682	199.351	575.814	166.899	170.995	188.747	184.5	133.773	149.913	136.875	193.494	178.004	13.2561	-1.02281	-1.33146	-2.86729	-1.734
	274.275	273,2672@1,23	3202.07	3012.74	2538.73	2054.53	1338.62	2336.07	4684.05	2104.93	2489.78	2026.14	2547.74	283.839	2129.36	2891.82	4301.45	8805.7	9535.91	11964.3	9490.19	10282.4	8992.2	8921.73	8658.61	8977.33	10.9859	-1.52788	1.06	-1.80199	1.06501
	281.052	280,0439@1,9	7368.33	4829.5	2291.78	4491.52	10599.4	5038.59	5219.85	3953.51	4170.34	3061.62	6506.67	2721.74	6327.11	4802.23	5697.93	4880.98	3950.34	4287.02	5749.08	3705.37	5650.01	4098.16	6230.34	4465.95	18.7998	1.38924	-1.08588	-1.17897	1.16133
	281.052	280,0439@10,36	5509.28	8151.89	3163.8	4809.75	2600.46	9699.98	5739.3	5188.57	5079.54	4542.73	3933.9	341.816	4122.82	5512.94	2479.04	14425.9	15192.6	15272.5	15591.8	16065.4	14005.1	14443.8	14220.7	14240.6	4.85432	1.01695	-1.05107	-1.90793	-1.38879
	281.052	280,0441@1,47	6564.4	4418.89	2628.81	4737.52	10777.4	5452.92	5315.95	4078.2	4367.17	3232.3	6590.79	2753.71	6521.71	5050.73	5868.43	5742.83	3916.72	4657.36	5845.19	3981.75	5399.86	4313.49	6638.5	4793.31	18.5133	1.54038	1.01096	-1.08232	1.28128
	281.052	280,0441@20,28	10931.1	10597.2	3779.07	6618.42	1864.4	13662.7	8471.72	6254.74	6610.19	5572.12	5690.46	639.563	4218.34	8905.57	2612.02	19730.1	20705.8	20583.3	21411.9	21604.8	19670.9	19776.6	19882.7	20210.9	3.58386	-1.14277	-1.1861	-2.12628	-1.60825
	281.052	280,0441@22,4	3943.31	3011.2	799.497	1783.85	342.438	3335.68	2128.13	1645.42	1782.56	1396.75	1521.83	1130.35	1190.24	2392.41	726.26	5017.76	5188.24	5421.73	5604.02	5528.25	5173.93	5291.03	5194.64	4938.4	4.2299	-1.41964	-1.39558	-1.91508	-1.79953
	281.052	280,0443@17,12	5753.04	5816.37	1773.21	3659.29	1140.99	7296.36	4070.61	3336.65	3536.36	2558.04	2819.13	470.309	2480.02	4595.65	1411.27	10738.5	10965.8	10708.2	11577.1	11723.9	10868.7	10310.1	10372.3	10684.7	4.4492	-1.103	-1.21922	-2.28177	-1.57214
	281.052	280,0443@13,82	7664.04	8581.51	3014.75	5652.5	2348.58	11214.7	6080.21	4849.94	5088.49	3900.46	3753.5	165.085	3654.58	6600.61	2253.47	15642.7	16291.5	15887.3	16681.4	17383.1	15117.1	14969.2	14971.8	15272.8	5.3312	-1.00232	-1.20237	-2.46325	-1.53976
	281.11	280,1024@1,03	195.829	621.847	300.894	538.694	376.917	481.469	483.985	309.085	377.642	244.318	235.791	14.732	260.554	290.038	208.39	279.857	339.116	348.072	245.087	277.438	272.954	408.67	332.141	286.242	16.3886	1.24899	1.04662	-2.26046	-1.47378
	281.151	280,1436@1,06	3471.05	10046	4350.46	5086.97	4700.24	3026.86	10172.1	6141.16	7506.67	8264.95	9749.72	62.1301	9144.26	7589.98	7463.19	12575.9	12403.9	14856.8	15938.1	11988.9	15140.9	13042.7	13079.5	14576.1	10.2553	-1.39437	1.33314	1.01171	1.35427
	283.264	282,2563@2,45	15044.5	24254.7	22057.5	18150.9	22362.2	22402.2	14281.5	20272.4	28849.3	16232	19839.6	525.185	17168.7	16717.8	14730	49848.4	50203.6	49149.9	49916.7	51490.2	49128.8	49464.3	50165.5	49480.3	1.45469	1.0254	1.03336	-1.67656	-1.26205
	283.296	282,2876@1,11	621.013	2733.89	1445.11	1898.02	2242.14	1453.83	2225.72	2450.62	2347.04	2497.13	2235.9	33.2848	2472.07	2022.96	2253.78	2178.47	1892.94	2109.45	2399.34	1796.85	2488.63	2068.73	2302.66	2291.31	10.5149	1.16541	1.4632	-1.00707	1.406
	284.295	283,2874@2,94	1897.97	2780.04	2078.83	3200.52	2445.96	3325.48	7103.22	1987.1	2193.83	1494.53	1672.3	148.507	1865.59	2373.08	1634.11	4978.11	5037.72	5143.9	5342.78	5768.83	5143.58	5090.07	4936.83	4907.76	5.18335	1.32783	1.67004	-2.03805	-1.15053
	284.295	283,2875@3,23	1717.65	2633.88	1547.84	3400.26	2355.91	2805.16	2737.62	2243.43	3124.38	1957.39	2226.9	390.446	1907.13	2863.67	1150.74	4383.5	4465.21	4323.18	4143.54	4498.76	3967.73	3931.63	4224.21	4593.23	5.43693	1.45123	1.37395	-1.28955	1.00376
	290.27	289,262@1,31	8627.44	18052.4	10963.5	13261.9	11477.4	6564.91	13152.9	9411.66	11752.2	5361.73	10736	46.3501	11130.7	7856.25	9895.88	25542.7	25883.8	26019.2	26303.4	26863.3	24826.9	24738.7	24669.7	25359	2.96745	-1.2025	-1.09694	-2.33171	-1.30331
	295.104	294,096@22,4	2364.84	1862.89	554.49	1087.41	1086.52	2205.79	1197.92	1438.38	976.877	1070.88	1056.91	637.017	646.136	1544.34	496.296	2804.38	3245.15	3044.2	3231.2	3205.09	3013.71	2844.21	3037.39	2965.52	5.27137	-1.0919	-1.32355	-1.72967	-1.77991
	295.104	294,0965@17,13	2376.75	2377.6	805.956	1655.79	944.154	3099.1	1807.74	1332.9	1517.32	1181.94	1235.12	222.635	1018.74	1999.87	540.479	4632.35	5007.17	4897.42	4766.1	5154.83	4585.07	4476.33	4496.29	4687.68	4.91996	1.02495	-1.19372	-2.10643	-1.56229
	298.311	297,3035@3,36	11843.5	16865.3	10033.8	18442.1	13609.1	21445.9	15190.3	11199.9	13692.3	9315.95	10356.7	258.579	12200.3	14464.3	9419.11	20894	21237.5	21215.3	21843.9	22407.9	21208.9	20830.9	20640.2	20808.5	2.66577	1.38083	1.03458	-1.94382	-1.07369
	298.312	297,3036@3,96	6126.06	9832.45	5586.39	9352.16	7730.07	11281	7929.19	6246.17	7542.85	5189.78	5820.67	124.398	6587.59	7858.24	5119.72	11429.5	11716.8	11733.9	12059.4	12291.4	11521	11296.9	11652.1	11210.7	2.99192	1.31647	1.00804	-1.93491	-1.10116
	304.262	303,2542@2,53	3253.9	4243.76	2368.42	4278.44	3936.44	4391.03	3398.31	3087.07	3558.52	3193.27	3301.89	91.0121	3213.6	4186.24	2815.93	4133.58	4208.89	4276.8	4219.22	4436.86	3850.78	4028.02	3919.51	3968.98	4.59953	1.2777	1.01802	-1.498	1.03544
	304.313	303,3047@1,05	672.202	3255.66	3132.71	3285.28	3178.29	2539.71	3359.87	3569.09	2904.05	2637.03	1880.83	26.1121	3470.06	2961.32	3243.29	2512.92	2235.16	2592.38	2910.43	1914.84	3233.94	2934.65	2917.7	2907.21	15.3128	1.27515	1.39267	-1.55383	1.37024
	311.296	310,2877@3,35	30342.8	53399	20600.4	33686.1	31570.4	46579.3	26196.9	25482.7	31865.6	31952.9	23251.6	363.833	27729.4	30052.3	28344.6	47607.6	48418.4	47389.7	49286.6	50070.7	46613.2	46649.7	47041.6	46359.6	2.69927	1.07182	-1.24893	-1.87773	-1.2115
	312.327	311,3189@4,08	4385.91	6502.09	4153.27	6955.78	4953.12	7652.95	7765.4	4062.86	5122.33	3850.26	3709.94	89.8359	4436.32	5525.48	3418.26	8938.14	9492.94	9075.58	9267.8	9512.1	8817.53	8528.26	8458.28	8662.74	4.39271	1.30055	1.12694	-1.96617	-1.12416
	316.213	315,2048@0,97	4929.13	1200.3	1030.76	1171.38	1001.41	1132.89	10214.9	6542.74	10215.8	4316.03	4693.23	18.147	3894.38	5880.11	3279.43	2674.29	2933.29	2861.53	3063.31	2694.82	2667.87	2551.39	2653.96	2926.86	6.11225	-2.16603	3.76715	1.26078	1.82312
	321.316	320,3082@4,86	12588.7	17530.2	7276.31	35317.7	16773.4	11630.2	11279.9	5689.22	18910.8	12672.4	8938.84	1959.83	6210.31	20731.3	8043.69	46745.1	46020.1	48110	47680.8	49069.5	45144.4	44272.6	43707.2	44682.9	4.03371	1.70399	-1.04223	-1.58649	-1.06889
	321.316	320,3085@4,64	75536.3	157433	45693.8	147757	66388.6	53555.3	102360	42455.5	217905	45381.7	58128.4	1385.12	42035.3	277264	34878.1	147084	147025	147591	149114	154685	141441	140097	142943	143904	3.05614	-1.04095	1.30165	-2.65658	1.27099
	326.343	325,3349@4,84	8979.41	13334.2	7674.52	13423.5	10137	17226	10775	8536.13	10426.7	7564.38	7970.94	128.156	8964.53	10620.1	6887.22	17335.2	17973.5	18314.5	18628.7	19208.4	17763.1	16770.9	17602.4	17966.3	3.98885	1.36009	-1.00842	-1.91453	-1.13283
	331.285	330,2775@2,45	24262.4	40184.1	38508.9	27807.7	38500.3	36247	22350.3	33903.9	48021	26493.4	33897.4	573.762	28212	27616.3	23299.1	89469.5	91668.6	96795.2	97733.9	101803	87280.4	86008.1	89759.8	90446.1	5.71972	-1.0039	1.01282	-1.68877	-1.30113
	337.202	336,194@1,89	3569.73	7608.33	3773.72	4542.46	3757.19	15919	4791.79	3203.83	3842.92	3774.85	2838.34	24.3753	3072.59	3001.18	2955.03	12214	12385.5	12033.7	12562.6	13223.1	11878.3	11678.7	11977.7	11937.1	3.81215	1.61978	-1.26298	-2.2526	-1.65601
	338.343	337,335@4,86	12440	16212.8	6340.54	35224.9	16918.7	11658.5	10259.9	7058.24	18766.9	12564.8	9449.25	1230.39	6482.78	20823.6	6973.57	45962.9	45456.8	47785.3	48225	48996.5	45066.8	43920.5	43748	44734.8	4.15996	1.82327	1.0312	-1.50545	-1.02081
	340.358	339,35@6,32	2265.86	3940.98	2004.48	3620.66	2710.12	4629.31	2729.63	2280.2	2802.69	1927.64	2196.51	159.919	2393.15	2943.69	1888.98	4918.85	4962.25	5143.06	5218.42	5086.18	4764.31	4660.76	4797.4	4629.7	4.30851	1.33475	-1.05105	-1.91671	-1.13639
	341.019	340,0109@20,28	3974.34	4020.35	1235.66	2577.71	775.2	4625.34	2548.09	2270.31	2522.84	1927.63	2016.42	268.196	1749.29	3183.65	934.038	7157.08	7007.21	7362.1	7322.43	7800.05	6877	6716.17	7055.79	6898.01	4.57035	-1.15694	-1.25733	-2.19131	-1.57327
	341.019	340,0111@17,12	6600.06	6775.72	2124.3	4274.09	1492.9	8646.22	4698.55	3930.04	4177.27	3262.52	3321.25	233.8	2815.77	5232.47	1729.08	12211.3	12367.9	12747.2	13676.3	13755.1	12187.4	12161	12261	11958.2	5.33376	-1.07541	-1.21039	-2.27355	-1.58531
	354.374	353,366@7,6	4162.17	7118.58	3882.85	6884.85	5228.38	9057.66	5447.51	4535.78	5386.66	4089.43	4081.23	20.0296	4591.47	5672.58	3687.19	8472.01	8526.57	8497.12	8759.93	9433.87	8331.27	8152.44	8307.03	8538.1	4.33168	1.39617	1.01361	-1.85132	-1.0869
	354.374	353,3662@6,5	5097.63	7504.14	4394.05	7788.97	6014.42	9942.76	6668.25	4964.46	5878.27	4189.31	4576.87	9.52006	4945.46	6413.71	4547	9290.59	9216.65	9324.08	9618.87	9607.03	8965.32	8722.93	8680.81	9342.09	3.72198	1.39718	1.03031	-1.93669	-1.0685
	355.071	354,0628@20,28	9587.44	9187.28	2959.39	6073.56	1728.08	11479.6	6899.36	5069.8	5856.75	4116.33	3721.49	357.623	3672.97	7496.71	1982.97	17365.2	17909.3	17813.7	18228	19040.1	16829.4	16521.7	17423.8	17197.2	4.31701	-1.12722	-1.21924	-2.65198	-1.65245
	355.071	354,0629@13,82	25461.7	28663.4	9704.95	18718.1	8051.55	37648.5	20343.7	16106.1	17704.5	13202.4	13126.5	122.12	12333.8	21536.8	7266.28	53106.2	53930.8	55149.4	56791.2	58380	51382.8	51467.7	52553.1	52301.2	4.50892	1.00921	-1.17867	-2.41314	-1.55165
	355.071	354,0629@2,65	4607.47	3423.23	1679.43	3030.62	6561.96	3577.94	2929.39	2688.71	2990.94	2321.07	3990.42	2025.06	4216.43	3847.11	3145.94	3885.06	3010.07	3518.2	4324.41	2875.87	4265.11	3083.38	4773.14	3171.69	18.6639	1.35637	-1.1279	-1.16476	1.15441
	355.071	354,063@22,4	8871.45	8463.09	2592.27	5104.24	1738.04	10663.5	6238.83	5024.74	5451.28	4781.39	4682.56	801.633	3381.73	7249.32	2293.35	14774.4	15460.2	15069.9	15925.5	16491.5	14347.8	14496.8	14614	14685.6	4.79493	-1.1383	-1.19216	-1.94113	-1.5418
	355.071	354,063@17,12	16229.9	15738.6	4913.98	10527.5	3155.04	20661.3	11408.2	9086.58	9630.22	7936.31	7928.43	91.2918	6296.51	12575.6	3760.74	29800.4	30947.7	30301.9	31772.3	33288	29232.6	28756.4	28805.3	29374.1	5.00733	-1.07392	-1.22432	-2.31151	-1.6296
	355.071	354,0631@21,58	18372.8	17495.7	6013.79	11786.9	4230.14	22852.6	12957.8	10299.8	11953.3	10063	9794.41	2049.91	7890.05	15025.4	5721.33	31627.4	32481.5	33104.6	33011.2	34604.7	31438	31212.8	31487.5	31339	3.54178	-1.07751	-1.18947	-1.9118	-1.46254
	355.071	354,0631@24,34	1817.36	2144	633.275	1261.37	698.434	2878.22	1367.12	1197.58	1484.67	1277.43	1318.14	554.863	769.136	1609.1	623.917	3439.6	3153.06	3133.89	3592.97	3528.55	3217.61	3071.95	3069.82	3221.93	6.08252	1.05297	-1.13465	-1.45841	-1.53045
	357.282	356,274@2,45	3614.09	5705.05	4869.4	4207.33	5059.12	5219.04	3275.12	4481.2	6384	3885.96	4841.34	90.6406	3950.55	3822.7	3286.62	10478.4	10408.2	10802.9	11285	11356	9695.95	9715.55	10584.8	10436.7	5.53264	1.02093	-1.00341	-1.60905	-1.28289
	359.317	358,3087@3,35	88948.6	174597	61413.4	98956.5	95975	139221	87319.4	74677	90566	94828.4	68659.3	595.214	84419.6	90735	84617.3	155248	157177	162608	167496	174974	153106	151455	152841	156672	4.9339	1.02829	-1.28665	-1.98046	-1.25094
	363.311	362,3033@1,92	238.35	231.315	438.585	1007.99	227.166	483.549	864.191	412.278	86.3982	348.162	236.989	75.3019	198.461	653.947	354.621	1578.61	1698.57	1505.21	1608.1	1560.55	1411.03	1413.47	1342.54	1552.28	7.38613	1.89232	1.50054	-1.37519	1.32896
	368.389	367,3816@7,79	2116.18	3576.11	1967.32	3530.6	2577.38	4365.64	2708.44	2212.02	2803.89	2105.01	1976.99	124.78	2189.37	2917.44	1958.69	4119.79	4046.8	4050.94	4045.09	4498.99	3773.71	3835.01	3870.09	3990.06	5.26713	1.36738	1.00845	-1.82078	-1.08409
	368.39	367,3817@8,61	8934.83	13483.7	7465.24	13360.4	9872.6	17730.8	10538.6	8481.29	10195.5	7758.19	7952.53	213.921	8854.62	10049.7	7161.37	18030.1	18077.3	18654.4	18715.2	19278.6	16918.7	17540	17533.8	17745.4	4.02135	1.37077	-1.02288	-1.87658	-1.14648
	371.102	370,0942@2,65	10633.5	7643.91	3998.6	6271.94	15990.9	8496.91	7882.97	6278.98	6793.34	5724.47	10247.9	4728.07	9997.29	8827.98	7677.88	8613.73	7725.27	8103.73	9622	6402.83	9710.15	7129.35	11211.9	7945.88	17.3743	1.38085	-1.06303	-1.07611	1.18976
	371.102	370,0943@3,9	4481.98	4046.87	1972.04	3220.67	7488.09	3909	2815.97	3191.97	3164.05	2866.46	4115.42	2430.04	4290.48	4378.21	2105.3	4520.77	3490.77	3950.99	4651.43	3117.49	5113.22	3365.04	5233.85	3688.31	18.8833	1.39205	-1.14489	-1.1157	1.02601
	371.317	370,3089@4	51734	76061.4	39933	72356.6	70499.9	71828.2	57357.7	54995.8	53038.9	55035.9	53760.4	524.445	54034	53103.8	50513.2	69483.4	71601.1	70682.9	70014.9	75662.4	68252.1	67925.9	67576	70082.6	3.50733	1.27995	-1.01412	-1.53428	-1.06392
	382.405	381,3974@9,14	5327.96	7853.31	4608.97	8089.9	6190.3	10806.1	6621.16	5073.27	6164.43	4853.12	4982.56	31.0387	5575.93	6178.61	4468.47	10159.9	10256.5	10940.8	10896.8	11517	10466	10265.3	10084.7	10407.4	4.45777	1.41012	1.00386	-1.80306	-1.09661
	387.187	386,1791@1,03	12538.8	35914.3	14965.8	24719.3	15313.8	20684.6	24632.7	18762.6	21449.4	18167.2	13234.5	112.174	11538.4	13141.7	10344.2	16417.8	16783.9	15976.6	16169.5	16659.8	15051.8	15544.9	15126.7	15447.9	4.0691	-1.04449	1.02248	-2.01241	-1.81071
	394.348	393,3401@7,98	85712.5	124512	66253.1	116676	112910	118666	90709.1	87466	89005.4	92876.7	89475.8	704.076	88075.1	87678.3	82865.2	112960	114781	114207	116690	121464	110393	110362	110099	111508	3.27828	1.25961	-1.0348	-1.51034	-1.06906
	409.272	408,2646@4	6453.84	9316.13	4737.62	8714.9	8598.9	8981.61	6875.23	6534.33	6280.98	6741.9	6818.82	147.737	6562.62	6607.04	6228.66	8361.04	8435.95	8567.44	8356.51	9006.88	8231.83	8130.45	7941.7	8401.22	3.55169	1.28223	-1.04149	-1.49598	-1.05718
	413.184	412,1758@1,03	3117.84	9114.14	3979.52	6283.76	3865.26	5426.63	6237.47	4762.82	5588.19	4584.53	3314.02	17.1392	3145.27	3642.71	2684.97	4150.69	3979.5	4051.3	4086.24	4166.96	4134.79	3747.13	4006.47	3757.4	3.95747	-1.04082	1.02325	-2.04802	-1.71135
	415.037	414,0295@10,36	3037.72	4463.43	1708.82	2461.25	1388.16	5204.51	3061.33	2661.76	2833.6	2146.34	2175.76	45.435	2254.17	2943.62	1345.47	7913.62	7816.77	7898.01	8238.63	8516.45	7475.54	7389.77	7235.4	7494.99	5.3963	-1.01723	-1.07635	-2.10873	-1.40755
	415.038	414,0296@20,28	3359.42	3405.67	1108.12	2045.24	734.455	4302.38	2562.46	2012.01	2113.81	1354.9	1677.88	169.896	1554.51	2599.23	833.083	5931.27	5952.96	6126.23	6239.96	6669.71	5853.3	5773.53	5886.15	5998.29	4.50569	-1.11171	-1.17716	-2.45832	-1.5788
	415.038	414,0297@13,82	4002.78	4158.37	1491.82	3059.23	1236.78	5877.1	3202.53	2543.1	2824.47	2153.36	2194.96	69.5475	1950.28	3283.58	1256.36	7864.25	8226.26	8243.59	8644.26	8789.53	7686.24	7669	7820.08	8003.96	4.98896	1.05388	-1.12636	-2.18499	-1.48731
	415.212	414,2037@1,06	86437.9	110973	41370.1	71766.3	55910.2	73150	98195.4	57116.4	75270.5	87989.5	109869	178.086	87356.8	90718.6	77658.7	147053	150279	150558	153289	155178	141099	143466	143042	144088	3.37543	-1.18899	-1.03556	-1.20574	1.071
	427.306	426,2985@1,54	213.863	336.515	182.175	288.806	248.877	354.275	4461.2	2723.33	1397.76	11485	1683.43	99.2988	23984.5	7941.52	16449.2	20696.4	21872.6	21891.4	22338.4	22477.4	20817.1	20138.6	20417.5	20425.5	4.2746	1.2176	11.7156	18.1116	66.0363
	429.09	428,0817@20,28	14199.1	13439.3	4241.45	9081.97	2707.79	17537.2	10289.8	7867.38	8793.72	6952.16	7284.25	593.483	5675.83	11551	3191.88	25987.5	26475.2	27018.4	27755.7	28711	25430.3	24945.6	25394.3	25840.5	4.66248	-1.08705	-1.18288	-2.1497	-1.5613
	429.09	428,0819@21,58	6603.21	7034.42	2329.32	4926.07	1855	8356.01	4628.15	4203.27	4560.05	3682.29	3647.93	683.167	2911.29	5672.45	1963.05	11345	11909.9	11587.2	12284.6	12565.5	11207.1	11115.9	11692.3	11317.1	4.28047	-1.05482	-1.19232	-1.99253	-1.51392
	429.09	428,0819@22,4	11070.1	10957.7	3270.58	6867.25	2512.61	13660.6	7636.86	6149.98	6913.69	5951.23	6357.31	946.289	4397	8854.28	2685.55	19368	19394.7	19218.8	19859.9	21144.7	18527.6	18352.2	18615.3	18384.1	4.67905	-1.098	-1.22211	-1.90862	-1.58742
	429.09	428,082@17,13	30443.7	29841.4	9435.68	19492	6851.73	38979.9	21558.7	16852.3	18167.8	14631.7	14737.4	305.395	12382.2	24553.2	7792.91	57619.1	59874.3	59969.3	61904.8	64056.4	56445.4	56702.1	57062.6	58714.4	4.35379	-1.06731	-1.23228	-2.34952	-1.55876
	429.09	428,082@24,34	2174.8	2099.76	644.36	1269.17	391.834	2564.83	1566.49	1251.82	1426.9	1088.87	1306.83	281.698	899.4	1768.46	445.996	3858.21	3644.17	3707.88	3928.68	4186.94	3658.25	3538.97	3499.15	3562.83	5.95767	-1.16401	-1.1587	-1.8372	-1.57969
	429.09	428,0821@23,28	5153.84	5525.04	1693.59	3256.4	1160.62	6936.51	3678.61	2910.63	3365.25	2995.76	3306.39	576.465	2064.81	4260.87	1312.9	9388.53	9131.44	9568.14	9756.06	9939.11	8969.76	8951.86	9280.32	9291.58	3.61821	-1.08975	-1.2429	-1.79869	-1.61974
	431.32	430,3121@23,36	41284.8	58286.2	31613.2	50150.2	53138.4	55634.7	36669.5	35906	40203.9	46307.5	44447.2	41455.2	38881.1	37849.4	35940.9	39211.5	45999.7	38408.5	40389	38293.6	38407.8	42002.5	41952.3	37239.2	6.79861	1.21145	-1.16319	1.00782	-1.16431
	441.216	440,2079@1,06	15957	19961.8	7859.67	13218	10786.8	13351	17911.7	10251.5	13586.6	16129.3	20141.8	72.2756	16050.9	17065.3	14197.2	27943.5	27851.2	27968.9	27609.9	29101.1	26636.6	27015.2	26398.2	26737.9	3.12169	-1.17194	-1.0486	-1.20458	1.08074
	445.334	444,3266@2,45	26920.8	42956	40046	32138.2	40421.8	40485.5	24965.7	36010.1	52549.4	28861.9	36069.1	257.931	31186	30278.2	26691.9	93375.9	92658.4	93191.9	94379.6	95920.2	90479.7	90767.9	90077.7	90496.2	2.20932	1.02841	1.03277	-1.68622	-1.24691
	453.175	452,1669@1,06	3754.57	5252.37	1948.04	3256.18	2635.75	3528.86	4560.43	2744.01	3460.37	3863.69	4761.89	62.4423	3776.28	4130.55	3145.94	6297.26	6597.75	6274.09	6609.6	6650.98	6249.52	6274.59	6249.04	5855.42	3.93369	-1.16285	-1.01767	-1.26093	1.00893
	453.22	452,2119@2,84	7861.07	11061.7	5727.15	9584.72	10062.4	10469.5	7062.31	6624.62	6578.79	8230	7911.94	21.1111	7737.83	7625.2	7406.78	9042.15	9070.33	9141.85	9035.25	9577.42	8582.24	8522.61	8910.31	8411.1	4.08638	1.22177	-1.21634	-1.52508	-1.08257
	471.332	470,3246@1,53	403.226	581.675	353.094	549.166	451.337	595.639	5857.28	3459.2	2069.07	16205.8	2013.64	63.6356	36916.6	11088.3	24231.4	31067.8	31234.2	31415.4	32304.5	33193.9	30051.9	29879.5	29585.7	30030	3.9271	1.19293	8.50941	13.6645	53.9884
	473.366	472,3579@3,35	77222.8	138932	52233.4	87121.5	81626.4	115875	67971.6	63794.9	79319.1	82038.9	57961.6	37.5185	71892.2	76079.3	73035.6	121830	123126	122659	122135	126692	120153	119543	120652	119023	1.91203	1.06049	-1.27147	-1.91654	-1.21439
	483.29	482,2823@2,45	2261.34	3467.17	3083.1	2684.35	3325.09	3133.29	2037.02	2743.91	4204.17	2352.51	2650.62	68.3343	2422.48	2407.64	2114.11	6943.78	6962.49	6942.27	6821.92	7348.24	6384.32	6742.82	6451.96	6749.98	4.2317	1.03758	1.01969	-1.73749	-1.26891
	485.291	484,283@1,89	33774	77331	38166.6	43661.8	36301.7	162081	46564.2	30855.9	35941.6	36620.4	26834.6	191.658	27924.7	29134.6	27387.3	124384	125895	127804	130719	134065	120697	119973	121219	122119	3.89152	1.6215	-1.31677	-2.34532	-1.76765
	485.361	484,3531@0,98	1767.65	499.189	289.429	652.993	625.655	372.249	17102	7613.13	17003	6300.01	9548.62	55.8599	6406.56	5624.63	4220.64	17384	17471.7	17741.7	17296.7	18687.6	16639.1	16212.4	16946.9	16681.8	4.22458	-1.54841	16.3199	6.22175	6.35763
	489.056	488,0483@17,12	3659.09	3699.17	1151.23	2593.06	913.985	4938.92	2781.29	2161.99	2284.79	1820.56	1650.98	156.981	1583.89	2964.92	1040.81	6772.53	6748.19	6913.54	7248.04	7394.56	6529.06	6345.38	6632.63	6587.65	4.99927	-1.00752	-1.17728	-2.34517	-1.52237
	489.057	488,0486@13,81	4409.61	5075.5	1805.27	3322.33	1419.01	6371	3598.84	2965.56	3144.2	2398.65	2327.92	87.293	2147.52	3545.45	1245.23	8838.68	9277.59	9036.94	9897.53	9596.09	8624.68	8638.61	8822.93	8978.86	4.78882	-1.01602	-1.16293	-2.34539	-1.62728
	503.108	502,1003@22,4	3253.92	2863.83	1014.36	1904.5	740.409	4018.04	2253.86	1922.11	2084.85	1561.75	1712.41	201.878	1275.4	2590.15	710.534	5270.33	5837.55	5306.05	5615.99	6127.67	5254.59	5026.46	5563.99	5351.26	6.18416	-1.07041	-1.13917	-2.05179	-1.55856
	503.108	502,1004@20,28	24191.6	23151.5	7264.28	15491	4455.94	29844.9	16896.3	12636.3	14865.9	11238	11922	559.016	9370.08	19022.2	5577.67	44190.5	46123.2	45195.6	45790.6	48808.6	44089.2	42705.5	43735.1	44793.9	3.90862	-1.09671	-1.22994	-2.30227	-1.60752
	503.108	502,1004@10,36	7184.28	10426.6	3886.96	5932.99	3387.92	12225.8	7073.29	6208.8	6522.82	5225.9	4799.38	114.3	5103.41	6722.57	3315.83	18561.3	18580.6	18745.1	19858.2	19871.3	17409.1	17760	17592.5	17855.1	4.97854	1.00227	-1.08548	-2.12019	-1.41977
	503.108	502,1006@23,28	5029.39	4774.47	1764.99	3038.77	1094.71	6338.32	3492.6	2940.55	3404.37	2898.54	3069.3	609.825	2036.4	4085.28	1337.1	8928.25	8822.88	9223.48	9376.33	9739.19	8663.55	8379.91	8454.08	8690.8	5.02621	-1.10476	-1.17599	-1.75881	-1.55104
	503.109	502,1007@21,58	8566.49	7911.45	2665.32	5534.78	1808.94	10407.5	6067.13	4584.55	5164.85	4449.8	4707.63	594.082	3395.77	6837.5	2215.73	14371.7	15457.7	14897.7	15487.3	16180.4	14157.3	13933.7	14575.7	14194.5	5.11226	-1.07842	-1.21033	-1.96311	-1.53773
	503.11	502,1016@24,34	5231.46	5116.79	1813.12	3301.42	1169.78	6454.81	3852.86	2949.81	3428.84	2935.59	2980.3	676.968	2129.43	4129.76	1455.7	8870.81	8926.47	8804.66	9191.2	9872.11	8334.34	8010.45	8407.29	8480.58	6.26075	-1.11307	-1.18862	-1.84463	-1.57635
	506.368	505,3601@2,45	2792.73	4529.57	4002.42	3506.63	4129.3	4342.76	2574.09	3624.86	5251.01	3090.95	3726.18	17.7318	3269.45	3075.25	2883.42	9140.76	8862.69	9204.3	9192.47	9443.64	8744.38	9145.84	8370.56	9080.48	3.50507	1.05775	1.01106	-1.6569	-1.2272
	511.287	510,2795@1,89	7406.85	15996.1	8082.49	9555.38	7769.08	31775	9793.77	6587.27	7498.49	7810.97	5654.54	41.6456	6031.36	6003.94	5845.97	25427	25085.9	25829.5	25578.6	26673.6	24047.1	24043.7	24097.9	24306.6	3.77463	1.55943	-1.31851	-2.33102	-1.76081
	515.359	514,351@1,51	667.194	828.851	620.475	820.005	962.161	888.454	7968.85	4597.89	2975.95	24128	2913.82	153.017	59169.3	15419.7	36428.6	46046.4	46534.3	46921.6	47789.6	49496	44383.2	43847.2	44292.7	44825.9	4.07305	1.2618	7.34352	12.8488	52.4529
	519.14	518,1319@10,36	46411.3	67447.1	25047.4	37740.9	19943.4	80207.2	46617.9	39287.4	42096.7	33583.8	31229	350.903	32828.2	44263.4	19269.1	123831	125270	126472	132087	138170	117851	118053	119233	123375	5.38825	-1.00736	-1.08518	-2.13164	-1.44152
	522.138	521,1303@10,36	4481.4	6910.62	2489.35	4110.43	2069.75	7784.87	4764.42	4044.79	4307.13	3568.66	3258.34	91.1194	3445.68	4351.89	1984.76	11841.6	12026.7	12000.6	12683.7	12977.8	11570.3	11590.9	11337.2	11947.5	4.41386	1.00603	-1.05833	-2.00653	-1.41902
	523.247	522,2387@1,89	1312.04	2723.76	1484.82	1928.51	1450.9	5601.68	1936.23	1256.31	1247.26	1296.19	1084.51	7.41855	1127.77	1055.99	1020.87	4447.4	4737.1	4627.85	4737.98	4912.63	4455.64	4317.96	4503.84	4437.44	4.16287	1.62683	-1.24344	-2.31169	-1.7227
	524.577	523,5693@17,11	4714.6	10939.6	5411.75	7722.47	5331.08	1137.68	5430.89	4741.8	6098.3	1711.25	5096.04	14.2065	4490.85	3666.06	5024.29	11060.6	11187.9	11262.4	11534.2	12197.3	10315.1	10977.5	10294.1	10891.8	5.29001	-1.48443	-1.29469	-3.08818	-1.59818
	531.275	530,2669@1,94	6194.44	13989.1	4136.9	6532.18	4841.94	7895.54	5975.64	4547.92	5516.49	4467.94	4834.17	7.86049	3805.35	7607.97	3071.66	1832.62	1859.02	1744	1935.56	2012.81	1763.43	1792.03	1718.06	1812.23	5.16716	-1.26211	-1.51623	-2.6123	-1.67901
	531.355	530,3474@2,45	942.411	1092.34	1025.93	1296.62	1458.96	1108.06	967.518	986.902	1318.2	711.66	972.636	197.171	760.517	769.663	721.147	1651.49	1866.3	1673.96	2157.62	1940.15	1864.97	1888.08	1834.92	1732.56	8.3269	1.26235	1.06925	-1.62675	-1.3595
	536.577	535,5695@20,52	977.578	1883.35	882.034	1201.76	1142.07	8656.54	1448.32	1400.25	1183.96	2628.95	855.336	51.701	832.376	1065.97	882.924	3459.97	3448.74	3646.97	3549.74	3869.73	3513.69	3725.81	3578.23	3656.48	3.75514	2.93895	1.07737	-1.05853	-1.34577
	537.536	536,5284@12,47	193.791	2322.52	330.389	9770.5	11921.3	3387.29	3509.35	5141.6	2563.98	1491.89	14490.5	527.846	24682.1	869.348	2156.75	15544.9	17019.8	15905.7	16538.7	17698.8	15597.8	15348.6	15732.8	15723.1	4.91764	8.80988	3.93962	5.79978	9.73344
	552.609	551,6009@19,81	25650.1	58884.9	28146.6	39277.3	28556.2	6448.52	29828.4	27037.2	33765.8	9147.95	24694.4	100.271	22856.4	17096.6	27187.1	59878.3	60603.9	60529.6	61145.8	64357.8	57488.9	57460.2	58105.7	58621.5	3.68488	-1.51694	-1.2433	-3.31977	-1.67831
	554.177	553,1688@2,65	3771.32	2830.68	1518.5	2311.84	5533.07	2771.77	2620.06	2299.41	2386.73	2194.56	3548.85	1592.71	3623.03	3256.84	2621.76	2873.37	2693.43	2809.45	3425.57	2268.15	3644.73	2473.6	3924.49	2715.95	18.7075	1.30739	-1.11145	-1.10692	1.17008
	559.385	558,377@1,49	770.505	1137.09	645.452	1052.47	965.814	1159.7	7607.12	4722.58	3092.07	24657	2977.62	150.149	66969.4	15690.5	38183.1	48934	49674.6	49717	50104.1	52645.1	47019.2	47985.6	47362	47405	3.65598	1.24478	6.04055	10.883	47.3329
	563.075	562,067@17,12	2583.81	2585.36	855.484	1888.29	611.552	3415.36	1949.71	1574.75	1689.2	1388.04	1322.4	56.4952	1081.66	2086.08	690.648	4775.05	4882.23	4876.57	5303.9	5449.87	4835.42	4705.03	4804.39	4828.29	5.18055	-1.0185	-1.15555	-2.17738	-1.56145
	563.075	562,0671@20,28	1883.2	1834.44	609.7	1336.08	494.049	2174.01	1393.88	1120.06	1102.22	1031.83	1141.25	27.1674	803.019	1495.48	531.559	3204.13	3275.53	3047.99	3275.46	3465.44	3088.61	3081.53	3048.65	3262.67	4.39911	-1.08071	-1.19667	-1.96675	-1.52906
	563.552	562,5439@2,53	21152.5	31117.7	15983.3	29712.8	26160.9	29503.1	23094.5	20461.1	25214.4	22857.7	21742.6	16.8859	20479.7	34094.3	20199.3	27476.5	27581.1	28144.7	29192	30226.4	26145.1	26100	26057.5	26776.4	5.3144	1.25088	1.00757	-1.52976	1.09552
	565.567	564,5594@15,19	1435.19	4637.59	1167.34	12943.9	15798.2	6361.86	4711.83	6394.53	4049	2545.17	20152.4	878.56	33159.6	2715.4	2971.98	21110.6	20808	21186.3	22160.9	23135.8	20522.6	20289.7	20334.8	20432	4.55126	4.84853	2.09325	3.25631	5.36551
	577.127	576,1193@21,58	10806.1	10467.4	3321.42	6727.32	2794.54	13371	7564.02	5804.98	6404.64	5896.56	6341.34	1151.63	4670.44	8688.32	2710.53	18514.2	18892.9	18917.2	19069.1	20697.8	17809.7	18383.6	18428.1	18611.8	4.24571	-1.07435	-1.24383	-1.83688	-1.53056
	577.127	576,1193@13,81	13896.7	15236.5	5295.11	10062.8	4281.62	20890.1	11390.2	8884.36	9462.81	7216.64	7328.7	259.724	6896.08	11756.7	4034.64	29202.7	29651.8	29713.3	30893	31869.4	27975.8	28339.2	28485	28470.4	4.3992	1.02342	-1.15775	-2.32544	-1.5175
	577.127	576,1194@22,4	3492.89	3311.11	1052.39	1891.75	615.628	3902.97	2246.82	1762.4	2102.9	1868.01	1854.42	436.92	1402.14	2572.6	919.735	5180.28	5609.85	5452.84	5626.38	6217.28	5332.33	5456.37	5479.54	5389.08	5.28689	-1.22558	-1.28538	-1.88885	-1.60516
	577.127	576,1196@24,33	1668.35	1533.64	521.362	1030.66	441.849	1958.26	1110.11	813	992.811	1165.62	1181.12	351.775	750.243	1391.77	479.406	2529.55	2543.09	2589.76	2711.02	2929.89	2572.49	2416.2	2516.77	2692.81	5.71859	-1.08528	-1.2769	-1.37978	-1.42036
	577.52	576,5121@28,41	10645.5	13412.7	8200.08	12639.4	13920.2	14104.5	10322	10123.4	11104.2	10132.6	10526.5	10576.7	11138.7	10189	10009.9	13774.5	12287.6	10835.9	10893	10445.7	12405.9	11390.1	12443.4	11280.4	8.98615	1.26058	-1.02246	-1.03273	-1.02938
	579.536	578,5279@18,98	31177	45593.6	36856.3	40322.6	60740.7	52818.4	28298.8	30491.8	45080.8	41081.9	39117.1	3042.81	44101.3	29450.6	37655.5	133596	137332	139461	142516	149250	130509	131875	134660	135840	4.25691	1.35427	-1.09392	-1.36502	-1.02176
	580.126	579,1177@13,82	1966.45	2305.07	807.158	1489.94	634.592	3071.91	1621.27	1340.2	1421.8	1148.74	1088.83	17.2441	1029.03	1839.22	552.884	4016.74	4166.91	4191.22	4458.43	4589.02	4029.31	3887.51	4068	4095.15	5.35442	1.02319	-1.15865	-2.25237	-1.48451
	580.64	579,6324@21,3	18559.4	44969.4	20766.3	27753.9	20581.4	5294.87	22149.2	20825.6	24928.7	7930.14	19519.8	122.511	15796.3	11598.7	19994.1	43647.1	44765.9	44805.2	44466.3	47559	42490	42210.6	43487.5	43421.5	3.60742	-1.57178	-1.24139	-3.05722	-1.77879
	593.158	592,1505@13,82	2843.77	3181.48	1087.27	2081.58	1018.34	4159.1	2095.63	1832.51	2002.73	1483.86	1492.54	56.9548	1414.39	2396.74	886.722	5566.58	5467.8	5582.5	5758.3	5899.44	5442.42	5333.53	5824.56	5372.94	3.6316	1.0206	-1.19924	-2.34477	-1.51399
	597.546	596,5383@18,97	18771.4	28715.9	24499.1	20097.2	32726.3	28958.5	14734	19081.6	24408	23210.6	23981.2	4760.62	22861.1	19821.8	22432.3	74707.2	78333.5	79759.1	80104.1	87100.5	74552.6	75729.5	76869.2	76233.4	5.00731	1.13608	-1.23638	-1.38562	-1.10552
	599.392	598,3841@1,05	6006.44	4594.45	2455.26	1370.2	1121.22	1172.62	6125.78	4801.75	6466.69	4727.05	4104.98	82.6639	4575.43	7999.58	3380.65	2184.75	2385.37	2424.38	2235.6	2395.27	2210.66	2330.09	2157.36	2126.16	4.96354	-3.56332	1.33226	-1.46456	1.22208
	601.319	600,3109@2,08	559.833	1478.28	411.593	512.19	506.953	649.675	590.654	405.251	513.731	401.189	395.367	20.0697	321.853	567.731	220.405	590.707	438.966	610.967	541.549	456.605	586.265	357.033	385.324	477.077	18.8185	-1.46793	-1.62271	-2.99978	-2.20696
	603.411	602,4033@1,47	865.735	1254.51	632.463	996.226	1093.28	1224.81	6346.13	3916.36	2802.15	21615.3	2680.15	192.773	64206.5	13482	33872.9	44611	44578.7	45448.4	45886.1	48632.6	43842.4	43051.3	43913.1	43378	3.79618	1.20402	4.74611	8.89608	40.5279
	605.551	604,5434@29,96	6449.46	7892.23	4633.69	8405.62	8167	8459.52	6908.47	6174.93	6698.98	6815.88	6088.67	6728.53	6626.78	5800.35	6827.42	8625.09	6931.8	7946.4	7470.96	8113.18	7117.76	7473.66	6938.2	7403.82	7.5521	1.31919	1.04253	1.03466	1.01471
	607.392	606,3839@16,02	15899.1	31814.2	13401.5	21552	17199.7	19803.4	17286.7	14395.7	17710.8	11842.1	15201.5	1524.51	14757.4	16433.4	12651.6	20417.6	21573.3	22829.6	22953	23777.3	21102.5	20517.4	21128.4	19910.9	6.12454	-1.04371	-1.23731	-2.13926	-1.39396
	607.471	606,4628@16,24	2707.99	3798.55	3604.19	3936.08	4785.98	8029.97	2231.8	2573.41	3254.22	3447.07	2938.53	784.946	3188.64	3638.54	3029.4	8194.4	7597.34	8459.94	8693.34	10662.5	8037.75	9315.53	7817.05	8628.49	10.7933	1.65686	-1.25452	-1.41004	-1.02578
	607.567	606,5594@20,89	191948	252252	150796	237816	237727	241134	165702	152699	174361	115100	122147	62629.4	192032	178381	187773	217730	223296	206576	219982	227038	220448	220552	225519	212924	2.89631	1.20451	-1.20747	-1.98414	-1.06595
	608.671	607,6636@22,13	48240.6	123249	55277.7	70590.8	50271.1	16829.6	56765.6	56004	66244	24174.9	50932.5	340.075	38343.4	27704.9	52410.2	116053	118410	117379	117607	124710	111193	112085	113442	115019	3.49136	-1.64693	-1.26676	-3.00564	-1.91432
	610.185	609,1772@13,82	331446	373273	119785	235448	91933.6	502309	261053	204811	223721	168202	155887	2423.6	156129	277293	89574.7	688923	700097	704952	723437	754047	669517	667928	679570	684106	3.98209	1.00629	-1.19565	-2.52519	-1.5765
	615.182	614,1737@13,82	2913.75	3264.33	1172.57	2150	955.26	4391.11	2337.68	1835.08	2035.69	1511.85	1483.02	64.4094	1439.13	2363.71	926.311	5986.62	6026.65	6132.16	6271.95	6420.22	5940.92	5718.17	5920.08	5716.84	3.88308	1.01982	-1.18397	-2.40273	-1.55433
	618.401	617,3928@1,89	196.208	432.59	165.654	191.508	176.938	495.423	3060.47	231.365	116.166	190.413	107.843	29.9761	80.6458	206.14	177.35	1084.18	1161.81	1154.75	1226.72	1340.56	1095.3	1089.62	1132.01	1189.98	7.02763	1.08738	4.28975	-2.4204	-1.71168
	628.195	627,1875@3,9	8452.3	7741.28	3893.33	6776.4	14360.3	7576.72	5249.54	5987.89	6059.37	5264.71	7260.59	4590.71	7956.18	7708.64	4139.61	7607.3	6547.05	7413.25	8585	6045.38	8905.39	6428.76	10064	6984.32	17.3934	1.42946	-1.16131	-1.17357	-1.01426
	635.502	634,4941@18,98	6097.6	8741.45	7116.55	9307.36	10099.1	11331.4	4861.11	5295.03	8610.37	6905.66	7404.67	1882.08	6052.7	4973.84	6288.85	24738.4	24708.4	24656.5	25826.6	25695	23302.8	21805.8	23471.9	23850	5.22489	1.4	-1.16994	-1.35592	-1.26798
	636.702	635,6944@22,95	6874.73	18889.4	7840.6	9862.52	7106.9	3931.67	8233.27	8918.6	9804.97	4972.58	7598.95	20.2269	5674.36	4307.54	7948.14	16401.1	16771	16705.8	17102.1	17857.3	16328.2	15941.7	16594.7	16508	3.25132	-1.6078	-1.24661	-2.66879	-1.87422
	642.604	641,5964@20,89	16458.6	19500.5	14333.7	29506.2	31615.9	28337	15080.3	12908	17756.3	16563.7	15685	7837.33	19507.8	15937.7	17225.8	78500	84211.8	81020.1	79345.7	86571.6	81627.9	79675.6	81759.3	81827.3	3.07371	1.77877	-1.09943	-1.25462	1.04729
	647.437	646,4292@1,46	689.162	990.959	519.364	944.935	893.261	921.661	4744.4	2786.46	2137.33	15805.9	2010.12	120.469	53517.8	9685.99	26643.2	35920.4	36496.1	36127.6	36314.5	39197	35303.4	34363.4	34779.3	34751.7	4.02725	1.25477	4.39566	8.15484	40.8491
	647.46	646,452@21,33	278547	518344	181045	301823	207739	340821	259386	208509	239882	190090	207010	10882.9	160587	297994	120695	15503.8	16554.6	16111.7	15354.8	16091	16602.9	15771.4	17187.7	16488.3	3.62065	-1.15	-1.3817	-2.39701	-1.6882
	649.517	648,5094@22,34	13893.9	20190.7	11754.9	20622.6	19315.5	15575.2	16250.4	16735.3	15473.6	17264.8	13342.4	16839.3	15653.6	14381.4	14600.5	14834.9	16171	8628.99	15802.5	13389.5	12608.6	16738.3	11260.5	13248.9	19.0878	1.21104	1.05715	1.03505	-1.02698
	651.146	650,1378@22,4	5338.56	5096.89	1604.35	3498.48	1278.78	6331.97	3930.23	3079.2	3252.54	2783.8	3108.98	478.376	2162.34	4311.88	1527.57	8861.24	9134.05	9148.17	9467.33	9778.1	8471.12	8417.65	8843.31	8600.68	5.10514	-1.08377	-1.17325	-1.88974	-1.50464
	651.146	650,1379@17,12	12973.1	12720.9	4139.45	8961.17	3150.84	17055.8	9529.81	7484.23	8263.87	6543.1	6406.61	268.887	5701.67	10577.5	3370.61	24726.1	25648	24719.6	25728.3	27055.4	23774.2	24467.3	23735.7	23941.6	4.42196	-1.02282	-1.18022	-2.25693	-1.51826
	653.442	652,434@6,58	4162.89	8715.37	2693	4020.77	3933.98	4700.66	3537.52	3193.49	3745.95	3347.33	3420.4	27.8539	2775.52	3970.5	2466.01	5180.47	5376.57	5395.25	5444.05	5964.89	5065.75	5190.08	5100.34	5407.32	5.08023	-1.2304	-1.48624	-2.29138	-1.69032
	654.144	653,1361@17,12	2459.09	2361.7	786.439	1563.36	616.783	3204.05	1769.45	1470.19	1620.39	1259.26	1236.97	38.0353	1048.92	1932.97	625.868	4482.93	4579.41	4656.6	4572.3	4979.83	4425.5	4352.13	4278.81	4416.38	4.57591	-1.04142	-1.15374	-2.21256	-1.55421
	656.583	655,575@20,89	62867	90864.7	52333.4	97413.8	87609.5	90888.8	53158.4	58284	109145	73506.5	74591.6	73253.5	67620	66062.1	64528	51852	79754.2	49978.3	53895.7	56637.6	59949.9	61042	51625.3	56107.1	15.5903	1.33896	1.07047	1.07418	-1.03963
	663.455	662,4467@16,03	667691	1.16725e+06	586319	986268	823603	915573	720166	658148	786224	604576	689563	5180.31	638890	682199	589486	842041	899093	845875	844708	940550	811304	810016	831070	835466	4.97992	1.12563	-1.1186	-1.86348	-1.2673
	664.734	663,7258@23,87	8260.28	22961.3	9004.96	12147.4	9078.02	6680.78	10006.3	10265.8	11292.8	7820.9	9251.03	88.6044	7134.06	5983.81	9311.8	20715.6	20612.4	21130.2	21526.5	21868.1	20286.2	20421.5	20827.6	20584.6	2.51543	-1.44149	-1.27441	-2.34413	-1.79345
	667.177	666,1693@17,12	2808.47	2551.61	826.883	1847.26	633.526	3456.99	1891.34	1588.02	1734.64	1385.39	1379.27	19.1492	1210.57	2205.05	657.74	4958.15	5107.76	5035.87	5507.47	5339.6	5105.13	4732.22	4777.95	5102.21	4.83093	-1.04196	-1.18661	-2.22248	-1.51888
	669.549	668,5407@2,45	5660.67	11225.2	17117.3	6077.68	9492.23	9550.21	4928.77	10296.1	21321.6	6271.27	10107.5	7.81879	7604.4	7142.59	5728.05	67522.9	70146.1	70735.2	73238.7	76979	65711.8	64421.5	65744.7	65912.2	6.06862	-1.35362	1.07479	-2.07506	-1.66071
	675.677	674,6692@4,64	3815.73	10028.9	1992.27	9208.36	2583.4	1631.15	6397.75	1512.15	25955.4	1601.79	2218.94	145.924	1450.06	47385.6	1058.09	10901.4	10719.4	11323.4	11538.5	12526.7	10650.8	10593.1	10531.2	10789.4	5.83048	-1.17984	2.13837	-3.99251	3.15047
	681.421	680,4132@21,33	17664	28873.7	12416	21540.6	16710	23195.7	17226.7	14653.8	16191.6	15139.6	14891.7	1219.57	13414.6	18071.3	10741.4	2501.93	3173.94	3733.83	2959.28	3509.17	3705.03	3217.67	3441.87	3466.25	11.8275	1.04228	-1.22636	-1.88647	-1.39611
	683.602	682,5939@23,36	1.63516e+06	2.10474e+06	1.20223e+06	2.22247e+06	2.18752e+06	2.21991e+06	1.66289e+06	1.60433e+06	1.65908e+06	1.79014e+06	1.70161e+06	1.69962e+06	1.69022e+06	1.54383e+06	1.64709e+06	1.72594e+06	1.74268e+06	1.67454e+06	1.66867e+06	1.62314e+06	1.73572e+06	1.73769e+06	1.75372e+06	1.7435e+06	2.63423	1.34151	-1.00321	1.05043	-1.01249
	684.204	683,196@17,12	674016	656765	199294	434259	139804	865387	482892	367154	411855	322943	319852	3934.7	273291	524382	160724	1.1557e+06	1.16645e+06	1.16443e+06	1.18153e+06	1.22409e+06	1.12458e+06	1.12062e+06	1.13141e+06	1.1357e+06	2.85651	-1.06296	-1.21252	-2.36587	-1.59649
	684.614	683,6066@21,76	67431.5	108854	66052.3	115808	123885	113505	88634.9	82592.8	86967.8	94484.6	89720.5	88373.8	87477.2	59605.2	85874.9	75204.6	73777.5	75396.2	70584.6	93198.5	73851.4	74002.3	75092.7	80297.5	8.64498	1.45746	1.06544	1.12479	-1.04027
	690.199	689,1913@17,12	2478.38	2370.1	772.559	1658.34	534.105	3221.56	1868.08	1386.36	1608.76	1172.83	1214.75	51.7794	1155.6	2056.19	643.184	4802.71	4862.31	4827.19	4869.1	5094.36	4669.88	4764.54	4404.74	4892.55	3.89185	-1.03824	-1.15583	-2.30431	-1.45812
	698.256	697,2482@21,11	50013.9	71105.5	35051.3	62080.9	63365.9	70584.6	60450	51409.8	62321.6	59569	55362.4	47919.5	54857.9	45918.4	59550.4	58970.8	63973.1	50469.7	62184	57202.6	55601	42617.7	44979.9	56220	13.3737	1.25524	1.11533	1.04277	1.02661
	699.596	698,5885@21,51	126253	169581	80436.5	165678	150741	149324	127199	109763	136699	145240	134521	134193	122512	103839	110106	119995	122014	111225	111904	120759	107583	130546	120810	121396	5.92464	1.23779	-1.00699	1.10015	-1.11834
	701.41	700,4025@16,02	30681.9	60729.6	28172.5	41909.7	35320.5	41145.5	35054.7	26864.8	34802.2	24346.6	29475.7	803.057	26133.8	35074.7	22968.6	40974.5	41925.9	42677	42698.2	44245.5	38879.3	40366.6	40374.1	39602	4.14911	-1.01021	-1.23637	-2.18917	-1.42062
	702.214	701,2066@5,77	7649.6	8418.13	4376.52	7509.1	13823.1	8750.41	4217.87	6764.66	6422.77	5819.65	7600.11	5479.17	7086.45	7855.55	2591.37	8304.76	7644.59	8753.42	9838.93	7116.42	9381.83	7056.02	9513.08	7277.06	13.1902	1.47145	-1.1746	-1.08177	-1.16602
	705.133	704,125@17,12	1627.43	1574.9	476.524	1026.07	239.588	2082.8	1113.52	892.01	1035.44	840.327	823.855	9.55383	711.561	1265.36	395.318	2924.25	3093.21	3066.75	2909.78	3306.88	2927.76	2971.5	2907.34	2860.13	4.64924	-1.09867	-1.20977	-2.19799	-1.5508
	705.544	704,5358@21,77	50356.6	65666.3	38077.2	71162.7	70164.4	77786.1	54069.8	52018.7	53995.5	59737.8	54349.9	55492.7	54003.7	54302.4	52777.9	58617.1	55919.2	54627.5	53793.6	55508.8	53343.9	56582.9	53805	55154.3	2.9917	1.42189	1.03883	1.10046	1.04532
	707.492	706,4841@16,02	18899.6	35435.9	15750	27822.2	20813.9	23806.5	20150.8	16261.8	21096.6	14462.2	17534.4	584.447	15794.1	18485.8	13879.8	24336.2	25108.7	24662.1	25775.2	26363.8	24292.4	23876.6	24506.2	24757.8	3.14859	1.03363	-1.21868	-2.15111	-1.45527
	708.49	707,482@1,44	508.315	767.341	506.818	732.621	759.548	787.049	3081.69	1766.81	1562.69	9925.1	1537.71	46.2683	38387.6	6220.44	17845.9	25545.4	25830.6	25776.1	26424.3	27664	24794.5	24621	24500.2	24789.8	4.02901	1.27868	3.5968	6.4568	35.0378
	708.614	707,6066@21,53	21830.1	26419.2	16398.4	29235.8	27967.7	32569.4	19540.1	19924.3	21339.1	22120.8	21858.5	21506.2	22633.3	22259.6	22202.7	20999.4	22343.8	18799.7	17904.6	23598.3	21697.9	16723.2	19457.4	17108.5	12.256	1.38865	-1.06322	1.01296	1.03787
	710.63	709,6217@22,04	57870.3	72805.5	42252	72205.8	74777	79389.3	50022.3	55520.3	49646.1	60699	41112.3	40031.4	51374.8	38434.7	57030.4	60927.8	60478.9	33361.4	58208.8	60080.1	44119	49748.2	63267.9	44125.7	19.6108	1.30906	-1.11431	-1.21915	-1.17766
	712.646	711,6378@22,54	37688.5	86560.6	50319.4	50321	77163.8	91414.1	41404.2	55954.8	66173.5	40939.7	59022.5	40282.9	59406.9	65585.5	67119.2	57442.2	34034.7	69411.3	68168	70577.4	62093.2	53125	60374.9	62349.2	18.7606	1.25394	-1.06749	-1.24474	1.10049
	717.527	716,5194@2,45	1710.69	2992.52	3964.91	1762.28	2713.52	2536.66	1307.9	2809.33	4882	1797.68	2599.1	131.855	1960.64	1958.11	1586.47	11136.3	11380	11526.2	11781.9	12137.6	10712.6	10862.3	10976.9	11143.4	4.0612	-1.2361	1.0382	-1.91407	-1.57453
	721.508	720,4997@16,02	22717.3	46573	19718.3	30938.1	25241.3	26365.3	23599.8	19567.1	24723.3	17008.6	23081	785.408	21120.2	22467.7	18895	28415	29796	30844.2	30237.5	33484.5	28358	28305.6	30029.4	28201.5	5.78297	-1.07831	-1.31107	-2.17758	-1.42453
	721.558	720,5501@23,36	372699	519588	283523	530839	518522	543145	396212	394147	400233	405963	413148	417258	403183	373162	401412	411619	428224	410669	399719	419005	381423	408210	403785	399277	3.26042	1.35439	1.01257	1.0515	1.00166
	725.164	724,1565@20,28	9143.24	9178.95	3046.17	6056.1	1745.08	11805.2	7087.42	4822.14	5706.82	4276.4	4253.28	254.651	4269.95	7385.31	2254.25	16465.2	16448.2	17042.4	17483.6	17572.2	15768.9	16074	16284.7	16614.8	3.69003	-1.08987	-1.21298	-2.43255	-1.53624
	725.611	724,6035@3,35	31932	82506.2	19618.4	30199.5	27079.5	55021.1	30274.4	21861.4	34406.7	33638.6	17720.4	15.9782	28093.5	32986.4	29395.6	89122.9	91984.8	92865.6	95250.6	102755	85646.6	85584.3	86810.7	87247.9	6.19908	-1.19374	-1.54903	-2.60938	-1.48169
	731.559	730,5509@22,03	25382.7	34293.9	19575.1	36308	35788.3	36445.2	29142.5	26635.6	26467.3	23797	28505.8	26238.9	26409.5	24437.1	27144.5	28893.3	27560.1	26174	27844.5	27940.7	27145.7	25500.8	27505	28593.3	3.93053	1.36958	1.03778	-1.00904	-1.01616
	733.574	732,5662@22,51	33799.6	46476.9	25550.7	39471.5	45710.9	47792.5	35864.4	33852.1	36120.9	38205.6	36471.5	35951.2	37496.5	34972.1	34608.2	36121.2	37929.7	36009.7	34005.7	36576.1	31904.9	33046.4	24641.1	35407.5	11.6616	1.25653	1.0001	1.04537	1.01181
	736.543	735,5356@16,02	4405.59	8615.34	3718.75	6263.92	4855.18	5480.41	4943.63	3908.04	5151.43	3528.54	4214.91	225.308	3945.31	4563.26	3574.09	6032.67	6074.21	5399.42	5803.33	6040.58	6036.32	5659.13	5842.8	5398.72	4.65611	-1.00844	-1.19543	-2.10067	-1.38543
	737.552	736,5443@21,52	35689.9	43671	27353.8	48291.7	47060.3	48328.9	22671	33006.2	33718.9	23334.3	36028.9	36660.1	35365.5	34030.8	30072.5	35503	39039.3	36674.5	33350.9	36980.2	25751.6	30809.7	36283.4	37014.2	11.8007	1.3464	-1.19373	-1.11134	-1.07285
	737.552	736,5445@23,36	57769.2	71531	42927.3	70112.1	74910.9	78925.7	57633.5	52167.4	57407.1	54076.3	58934.5	54485.5	58601.3	51698	57731.7	55661.6	61456.7	59979.4	59475.9	60980.6	52518.3	47242.5	59026.5	53906.2	8.38146	1.30031	-1.03002	-1.02825	-1.02497
	738.661	737,6532@22,75	35702.8	51942	29959.1	54020.6	53477.3	56015.5	42339.4	41166.9	41420.3	44331.1	41558.4	42106.4	39955.3	28840.9	39482.8	42522.5	43646.1	42782.2	38290.5	41974	44117.8	42979.8	41733.7	44420.2	4.28376	1.39037	1.06227	1.08836	-1.08612
	740.677	739,6692@23,35	95401.8	126539	70631.3	137539	143707	138547	93852.9	97949.8	91245.4	100787	93796.4	105577	105171	99768.9	103818	96127.5	100807	94193.6	94850.6	96836	101863	96667.6	99921.2	93672.1	3.05848	1.43483	-1.03365	1.02593	1.05532
	741.196	740,1883@20,28	811648	806271	255534	544584	172131	1.00213e+06	605540	465312	530083	375421	386193	7849.85	312787	611025	172727	1.16697e+06	1.18433e+06	1.18152e+06	1.19396e+06	1.2228e+06	1.15312e+06	1.15594e+06	1.16952e+06	1.17072e+06	1.81761	-1.08995	-1.17022	-2.43475	-1.70852
	750.523	749,515@16,02	7371.92	14832.1	6373.99	9525.53	8870.4	9280.23	7626.46	6848.43	7597.73	5490.47	7127.48	466.569	6537.64	8010.66	5660.52	9041.76	9761.77	9373.44	10228.8	11655.9	8577.57	9127.54	8925.62	8972.79	9.87513	-1.03258	-1.29472	-2.18411	-1.41413
	752.516	751,5077@1,41	271.445	473.245	330.916	411.37	552.729	603.212	1740.69	1113.39	796.992	5302.96	842.984	8.84333	24492.1	3436.25	10830.7	16869.8	16670.8	16712.6	16713.5	17753.2	16259.9	15953.7	15930	16170.6	3.43272	1.45714	3.39443	5.72216	36.0347
	757.575	756,5674@22,27	7361.35	10034.4	3405.93	10384.4	8499.93	9905.51	6979.59	7547.95	7662.79	7790.11	8369.69	8242.24	6851.68	7157.27	7089.03	8074.09	8372.52	7493.53	6636.26	8312.12	6423.86	5643.93	5329.54	6061.43	16.8729	1.38401	1.06676	1.17308	1.01424
	758.223	757,2151@20,28	760034	750034	226647	495629	125610	946792	559878	426684	492647	393372	402827	10710.1	311238	609396	172345	1.10506e+06	1.12112e+06	1.11515e+06	1.12845e+06	1.15241e+06	1.08587e+06	1.08997e+06	1.10313e+06	1.10702e+06	1.83098	-1.10758	-1.17408	-2.15231	-1.58897
	759.224	758,2157@20,28	448811	427302	124094	277207	68846.7	553562	321665	241917	280257	219496	227813	5686.24	175916	355518	96672.3	685717	696825	695602	701521	718916	673548	677785	684523	686758	1.98858	-1.11181	-1.1853	-2.20799	-1.59242
	759.59	758,5821@22,75	19124.2	28858.2	14045	24275.6	27785.6	27117.5	20374.7	17164.7	19786	20213.3	20446.5	20071	19962.8	18223.8	21199.9	21728.3	21182.6	19289.3	21866.7	20920.9	18935.2	19972.5	18297.3	23184	7.7113	1.27651	-1.08202	-1.02135	-1.04447
	761.606	760,5982@23,21	24395.4	33781.5	21737.5	41217.7	40968.2	40748.4	26136.7	30329.7	31963.1	29334.1	31577.5	32093.9	31514.7	29629.3	29885.1	33774.7	32867.7	31797.1	32735.9	32685.6	30709.4	33093.4	25903.9	23183.2	11.9849	1.53832	1.10655	1.16381	1.13908
	764.218	763,2101@20,28	5084.73	4623.23	1437.85	2647.18	1082.97	5262.42	3512.58	2685.05	2945.07	1970.26	2230.69	191.102	2080.1	3728.29	1290.09	8470.89	8626.28	8527.58	8522.72	9163.97	8070	8170.6	8416.75	8367.09	3.66708	-1.23945	-1.21909	-2.53772	-1.57017
	764.539	763,531@16,02	2279.56	4180.85	1770.19	2987.9	2681.28	2433.55	2038.5	1953.25	2055.46	1796.7	2155.6	57.0739	1995.49	2324.35	1815.95	2602.17	2675.38	2919.63	2974.23	3276.45	2491.3	2364.43	2582.53	2675.35	10.2737	-1.01578	-1.36106	-2.05284	-1.34141
	768.635	767,6267@3,35	9129.47	18834	5622.65	9086.27	8542.61	14790.1	8037.96	6831.69	9655.42	9589.04	5538.6	24.3289	8110.11	9175.6	8575.27	17169.5	17231	16899.9	17091.4	18276.4	16724.2	16602.5	16797.7	16625.7	3.02374	-1.036	-1.36946	-2.21662	-1.29872
	768.708	767,7006@24,07	76701.9	96401.1	60722.2	114911	101015	113883	86702.8	72542.3	78560.9	90866.3	76242.6	84724.9	75898.9	72944.6	75462.6	83097	91073.3	73202	68895.6	87276.9	83738.5	89466.5	80649.4	83338.1	8.82509	1.41049	1.01702	1.07702	-1.04244
	772.275	771,2668@22,09	32452.6	39840.4	21232.6	42095.7	41964.7	44670.5	31645.3	30530	31701.7	34743.1	33748.4	33806.1	32555.2	30877.7	29445.7	33247.8	34022.8	33711	33883.2	31747.2	31975.1	33477.8	34303.1	33589.9	2.66582	1.37642	1.00376	1.09379	-1.00696
	773.606	772,5985@23,08	9113.37	14145.8	7377.89	14086.3	13761.6	13324	10133.7	10568.7	11588	9837.72	9702.46	9661.64	10146.4	10321.8	9360.99	11890.2	10285.1	10043.3	11298.7	12496.2	9362.47	9224.31	9521.17	10244	11.0574	1.34386	1.05396	-1.04915	-1.02708
	775.622	774,6139@23,59	13601.8	17632.6	10967.2	20685.8	18023.4	17196.6	15667.5	12854.2	15693.1	16907.3	15136.2	13299.1	15511.9	12905	12511.5	14288	14995.3	14513.7	13198.6	15943.1	14339	15067.8	13628.1	16426.3	7.0005	1.32473	1.04771	1.07443	-1.03111
	776.233	775,225@8,29	5636.44	8743.33	4403.04	7167.73	10962.5	8643.16	3401.65	6666.42	5916.49	5487.48	6019.21	5280.83	5118.19	6404.83	1768.33	7444.24	7094.94	8869.92	9221.76	7084.83	7705.43	6391.64	7808.63	6347.13	13.1178	1.42542	-1.17506	-1.11886	-1.41316
	779.151	778,1436@20,28	4028.23	3526.48	1174.23	2475.93	864.701	4565.6	2631.63	2058.78	2442.14	1872.83	1885.34	117.594	1745.32	2944.81	976.731	6670.97	6678.93	6685.81	6628.05	7069.37	6428.67	6629.03	6451.63	6838.75	2.88809	-1.10406	-1.22382	-2.25219	-1.54035
	780.569	779,5611@16,02	4130.73	6926.75	3366.22	5272.18	3799.94	4484.85	3861.35	3118.93	4002.5	2740.84	3162.49	471.553	2971.99	3543.48	2735.91	4585.06	4919.85	5032.01	4978.08	5280.18	4608.1	5029.84	5027.1	4501.1	5.33294	-1.06393	-1.3133	-2.26258	-1.55909
	780.708	779,7006@23,97	59651	69719.2	41267	75572.3	72438.7	74443.6	62329.4	54579.4	59296	59508.2	55184.7	59894.2	59965.9	52123.2	61318.8	62780	59287.3	62366.8	44886.3	45571.1	59585.6	62858.4	56737	45596.2	14.1852	1.30367	1.03263	1.02315	1.01624
	782.724	781,7161@24,53	59093.7	76079.6	42320.7	80669.3	78753.8	78132.8	67548	61880.3	61672.4	64346.4	64931.5	58867.9	59935.1	55814.2	57330.8	65354	62475.8	65842.2	47955.4	61041.7	59847.1	64733.8	66821.5	69675.9	10.0179	1.33839	1.07666	1.06001	-1.0255
	785.233	784,2256@20,28	6999.82	6715.13	1977.91	5245.67	1826.86	8315.56	4878.6	3217.73	4232.34	3301.53	3339.03	266.574	3048.82	5385.5	1916.4	11872.3	11659.8	12004.9	11275.3	11813.3	11544.1	11323.7	12379.2	11746.8	2.91417	-1.01981	-1.27288	-2.27198	-1.51611
	785.606	784,5985@23,03	13690.1	19481.3	9371.96	18658.2	18243.5	18280	14298.4	13191.9	14013	14723.9	10716.8	14026.3	14553.9	12524.9	13483.2	12361.7	15157.2	13820.3	13396.2	14392	12985.6	14160.6	13876.3	14401.3	6.03031	1.29707	-1.02506	-1.07795	-1.04885
	787.622	786,614@23,52	30759.4	44439	25172.1	46684.7	49968.3	45670.2	38672.6	33942.9	34446.6	33857.7	38309.1	36128.8	35363.7	32712.9	33288.4	39325.9	36811	39178.3	37790.8	35534.1	33242.6	34678.8	38723.1	35696.7	5.82297	1.41798	1.06667	1.07896	1.00991
	789.638	788,6297@24,08	45111.8	59251.8	36536.5	59483	66540.6	61305.2	52108.2	45921.3	52366.4	49383.5	46549.7	47263.9	44438.3	43435.5	44289.2	47761	49644.9	52327.3	52118.6	54993.6	43135.4	45240.1	51887.3	46273.8	7.93783	1.32952	1.06739	1.0163	-1.06611
	790.555	789,5469@16,02	3368.67	6704.32	2947.1	4421.08	4162.34	4184.79	3350.03	3063.05	3523.25	2516.65	3283	235.691	2750.63	3511.32	2673.16	4438.32	4245.77	4464.26	4618.86	5105.79	3819.42	3950.47	4053.28	3988.32	9.41859	-1.01973	-1.31035	-2.15731	-1.45718
	791.499	790,4915@16,02	16195.3	32928	13841.4	21397.4	17918.4	20188.3	17525.5	14953.4	19263	12375.8	15538.5	277.025	13542.9	16425.9	11878.4	21548.9	21284.5	21634	22618.7	23881	21739	20846.7	21058.7	22431.2	4.3147	-1.05816	-1.2169	-2.23347	-1.50463
	792.708	791,7006@23,91	64517.2	80325.8	50175.5	90961.7	91743.5	91500.6	65278.8	61775.7	66041.2	74106.4	70480.7	68809.1	64347.9	62928.4	60392.4	54575.5	65159.7	56326.1	68220.9	56675.3	74414.2	68647.3	59266	71269.2	11.4252	1.40605	-1.00996	1.09424	-1.03916
	794.725	793,7169@24,46	130465	168076	102917	178257	174751	174207	144556	123924	145456	158033	129820	144588	134861	122139	139075	141297	152597	133399	130521	145683	145852	132088	144800	125862	6.42367	1.31325	1.03108	1.07718	-1.01359
	796.74	795,732@25,1	124353	159553	92448.4	184475	166119	168641	131757	132722	125978	133918	127963	126633	127079	118601	122581	138397	136952	132961	127616	132315	133954	133885	148862	138639	4.3577	1.37964	1.03747	1.03231	-1.02198
	799.249	798,241@20,28	2776.39	2658.71	859.286	1926.47	519.776	3338.4	1995.61	1403.08	1670.34	1321.91	1507.76	43.6173	1113.24	1995.04	690.264	3988.92	3906.85	4189.12	4462.69	4757.08	4084.5	4061.29	4212.05	4168.57	6.20114	-1.08812	-1.24173	-2.19066	-1.65705
	799.68	798,6719@24,47	38940.1	47958.7	29923.3	51331.6	56024.6	53580.9	40665.2	35964.1	41277.4	45350.4	40200.8	39676.3	36799.3	37369	38301.4	41508.6	41650.3	40048.6	39070.2	41266.4	37761.5	36914	38773.1	40693	4.30285	1.37763	1.00928	1.07195	-1.0387
	800.624	799,6166@2,45	1132.81	2075.04	3083.93	1168.73	1798.24	1856.23	906.022	1911.95	3820.39	1106.65	1778.29	8.0474	1338.36	1314.47	1089.17	10438.3	10693	10938.2	10681.4	11481	10132.4	10368.4	10366.1	10206.2	3.96875	-1.30448	1.05508	-2.17484	-1.6814
	801.638	800,6297@23,96	33175.8	48136.6	28075.2	48070.3	45140.6	39314.8	37566.7	36028.9	34730.1	38754.6	37903.4	38247.2	35928.7	35526.2	34589.3	38214.6	37932.6	37462.3	36267.8	38391.9	34472.9	35827.3	37057.6	38063.9	3.55206	1.21152	-1.0098	1.05044	-1.03153
	801.695	800,687@25,1	32489.4	43373.3	24326.8	45697.7	43467.9	45533.2	38134.6	36063.1	34581.5	35698	32391.5	36239.1	37109.4	32298.4	32847.4	35246	37519.5	33526.5	36893.6	34427.5	33121.4	34360.3	33836	36345	4.46667	1.34444	1.08573	1.04131	1.02062
	803.653	802,6453@24,53	36542.6	47157.7	27322.3	47431	46818.2	48181.5	41828.5	35060.1	41225.5	43747.9	37235.9	40024	41864.9	34872.2	35222.6	43989.1	38207.2	39003.8	37301.5	38120	39775.3	36104.9	36052.3	38031.4	6.20128	1.2829	1.06387	1.08994	1.00844
	806.724	805,7163@24,39	55474.2	74416.5	42552.8	73201.6	72511.5	77241.1	55939.7	56531.2	53504.6	64138.2	56243.2	60228.3	55057.1	54364.5	57433	61610.7	54386.8	58113.7	57631.8	51483.2	60841.1	59317.4	60342.8	46720.4	8.73623	1.29291	-1.03897	1.04736	-1.0335
	808.74	807,7322@24,98	105389	144635	74836.3	139903	129228	138470	108751	104387	113190	122605	105457	103768	106027	101113	111607	117036	119979	111314	105956	117570	105775	108343	115560	113977	4.64209	1.25469	1.00451	1.02145	-1.01918
	810.755	809,7475@25,64	78339.6	102649	66644.3	112804	109756	107159	83544.8	80518.9	90496.4	89020.5	91281.6	83844.3	91965.5	75793.3	82385.5	83179.7	91772.3	78870.1	85673.6	80390.1	85629.2	84528.2	85152	84494.4	4.31687	1.33148	1.02797	1.06668	1.01014
	813.638	812,6297@23,91	39704.8	56687.8	30466.6	57611.8	52871	57771.8	39251.1	40716.4	39113.3	38328.2	45401.1	36842.5	43210.3	36950.2	42988.2	46065.9	44735.3	46605.5	44873.2	43169.4	42737	41680.8	43420.2	46852.9	4.10088	1.32631	-1.06532	-1.05215	-1.03013
	815.215	814,2068@21,58	719129	780618	285709	587923	208743	922031	584262	490953	545718	460349	475317	68923.6	389324	623246	241610	919725	933898	926669	939493	950922	915665	913010	925533	918527	1.33595	-1.03884	-1.1015	-1.7773	-1.4236
	815.654	814,6462@24,46	82237.2	110096	61827.8	113823	121205	114963	87664.5	82299	85906.1	99982.2	85906.3	87732.6	86868.5	77861.2	90637.5	89177.3	90951.5	87062	92949.8	88039.4	80162.7	82534.1	85121.6	96367.6	5.75067	1.37705	1.00672	1.07657	1.00475
	815.71	814,7022@25,69	22441.5	32865.8	15119.8	29013.7	29767.6	28426.1	25118	22045.5	24846.9	25511.5	23329.3	25269.9	21317.2	22449.1	25133.2	22606.8	22475.5	20447.1	23848	22477.8	21311.3	22278.2	20917.5	20336.8	5.35326	1.23826	1.02248	1.0523	-1.02217
	817.669	816,6608@25,1	75699.3	113747	62891	105530	101786	114739	79141.2	75567.1	77736.5	79179.6	77989.9	82333.9	68509.4	73019.9	75269.9	81603.7	93662.5	90880.9	79931.3	80356.2	83104.3	88304.4	68976.6	80862.9	8.75775	1.27629	-1.08558	-1.05358	-1.16392
	818.724	817,716@24,29	36491.8	46844.8	27888.2	52189.4	49503.3	44356.1	39120	33167.9	34382.5	39608.1	33949.8	34521.1	37600.3	36015.3	38355.6	37807.1	38154.9	32713.7	30558.2	36212	37760.9	37630.5	38046.6	34429.8	7.66948	1.31309	-1.0427	-1.02911	1.00671
	820.74	819,7325@24,91	138188	177886	101941	187971	182221	187277	144046	123170	141527	150826	140533	127998	137684	132870	135718	154267	152090	132975	142448	143080	142989	142618	145334	151510	4.50476	1.33361	-1.02269	1.00321	-1.02891
	822.756	821,7478@25,51	208008	271604	156161	290756	277028	286421	219510	218095	214227	227059	217786	218323	217357	202827	222172	223658	221918	212343	204214	212075	226571	235204	226881	225161	4.32106	1.34357	1.02526	1.04309	1.01036
	824.771	823,7635@26,35	169314	218799	131123	242352	222896	237282	178773	162552	175230	186332	175254	169853	170940	162491	167110	190431	188296	179153	176648	180073	191987	187774	192057	190833	3.24311	1.35301	-1.00519	1.0235	-1.03735
	825.638	824,6299@23,82	6402.8	11461.1	5479.19	12419.9	10152.2	9929.05	7422.71	7158.06	8771.86	9415.16	8022.72	7568.85	7206.98	7237.61	6659.84	7366.14	7952.62	7534.17	8629.69	8387.41	7612.2	6552.55	5852.48	7698.48	11.485	1.39232	1.00041	1.07127	-1.10608
	825.696	824,6878@24,91	39780.7	52280.4	29722	51810.1	50921.5	55760	40653.5	40138.4	41080.2	43853.1	41681.4	40483.5	39819.9	38874.1	41293.9	44582.4	44130.2	39313.4	42082.7	41843.6	41350.1	40487.7	40077.8	41732.3	4.17546	1.30142	1.00073	1.03477	-1.01496
	827.654	826,6457@24,39	39710.4	43913.1	30558	51708.5	47476.8	56723.6	40325.9	32323.9	39370.6	43493.3	41517.1	39889.4	37734.4	38742.5	32815.5	41468.6	41638.7	40679.6	31953.9	41035.9	37919.8	32444.7	38738	40573.4	9.80873	1.36545	-1.01929	1.09387	-1.04473
	829.669	828,6616@24,98	66863.9	88723.5	54060.9	97216.4	89429.5	97668.6	62339.4	65699.2	70849.6	61739.2	74718.2	77397.4	69717.7	70962.6	72071.1	71416	70165.8	73360.8	69473.7	68600.6	64949.4	63013.8	68324.9	71446.1	4.73346	1.35615	-1.0541	1.02006	1.0148
	829.726	828,7185@26,33	45130.1	57393.2	31759.1	57529.9	55380.3	60891.5	44633.5	37804.8	44508.2	46280.5	44543.2	47589.9	42541.8	41673.2	39449.5	45900	47492.4	45651.8	43805.6	47941.9	42055.4	48766.5	46561	45006.9	4.58108	1.2943	-1.05779	1.03076	-1.08586
	831.685	830,6768@25,67	51604	69056	38180.6	70484.7	68290.7	70434.7	61094	51060.3	52467.1	57407.1	54727	61569.9	58838	53876	50892.6	54674.9	54730.5	52940.8	61455.2	54432.3	48601.3	50660.5	51889.7	54633.5	6.65885	1.31711	1.03639	1.09357	1.03
	834.755	833,7474@25,43	66267.2	85331.1	50793.1	90098.5	89909.2	94988.3	63143.8	67721.3	67696.4	72497.1	71077.9	70158.3	72820	63959.1	65116.2	73713.2	75356.5	78006.1	70385.7	69679.7	73216.6	75071.5	73332.8	72390.2	3.46676	1.35873	-1.01929	1.05604	-1.00246
	835.507	834,4989@16,02	2471.37	5031.9	2273.49	3656.75	2683.3	3222.79	2707.94	2287.79	2925.7	1974.02	2292.05	258.801	2155.13	2635.13	1822.12	3123.81	3409.09	3292.94	3427.13	3461.45	3145.95	3323.36	3073.72	3337.41	4.31242	-1.02237	-1.23422	-2.16067	-1.47855
	836.771	835,7631@26,14	103064	132374	74193.1	140239	133938	139355	104709	97707.3	106860	112460	105012	103285	103979	98970.7	100178	115551	110555	108147	105996	109099	115470	115534	116618	115270	3.56428	1.33556	-1.00115	1.03593	-1.02146
	838.787	837,7787@27,06	55564.9	71800.9	41326	77303.8	72729.8	76754.5	57880.8	59210.5	59981.5	66020.5	56817.2	55640.6	60204.9	53450.1	54287.2	61226.7	51546.7	63319.9	54642.5	60368.2	66099.4	61195.2	62024.8	63048.9	7.48675	1.34439	1.04968	1.05801	-1.00446
	839.653	838,6456@24,3	25579.3	33517.8	16725.5	34372	33641.5	30489.4	25959.3	22844.8	26890.7	24618.2	26825.9	25737.3	25613.3	23966.6	25493.1	27610.9	26558.3	24486.9	26027.7	27335.8	23566.7	25440.7	25643	25493.5	4.98407	1.29912	-1.00169	1.01792	-1.00999
	839.711	838,7031@25,43	21790.1	26947.5	16261.7	29368.6	30496.2	29541.9	22464.6	21674.7	21406	23956.1	22675.2	22556.2	22340.3	21473.7	21834.4	23090.9	22250.6	22579.7	22872.2	23672.6	22993.7	23002.7	19806.1	20442.6	5.83839	1.3755	1.0084	1.06443	1.00999
	841.67	840,6622@24,91	90766.2	109967	62972.1	114937	120056	111034	86858	89217.3	93257.1	100631	93402.1	90514.3	85409.4	87524.2	89613.5	92962.8	95560.3	96178.9	97028	96587.6	83835.9	89577.3	93693.2	94039.5	4.52229	1.31217	1.02134	1.07904	-1.00441
	841.726	840,7183@26,14	29245.8	36035.9	22700.2	39912.6	39053.8	39207.3	27636.9	29571.6	26224.5	31322.3	31028.1	31487	27915.2	27340.2	28515.8	24587.6	32484.3	26469.6	25018.9	31372.7	25058.4	29881.1	30356.8	27240.2	10.7431	1.34316	-1.05452	1.06655	-1.05026
	842.708	841,7@22,87	9739.2	14106.9	5450.63	13867.4	13885	11660.2	9675.57	10765.8	10095.2	10756.8	13751.4	10509.3	10062.9	9509.86	9454.72	10086.4	10794.8	9757.84	13461.4	9244.31	12725.2	10102.1	15474.1	10495.3	18.3031	1.34529	1.04232	1.19527	-1.00927
	843.685	842,6771@25,52	148582	195060	102588	200591	186696	189379	138742	136471	140789	148188	144088	148942	150235	144393	147690	146638	150319	143656	152889	145275	130555	138512	141810	156523	5.38522	1.29231	-1.07266	-1.01136	-1.00885
	843.742	842,734@27,06	15783.8	18444.4	10118.8	20275.3	19439.8	19363.8	15135.8	14465.3	15968.2	13870.5	13564.7	14477.4	12667.5	13168.7	13518.5	15840.9	15680.7	15787.2	15770.3	14831.6	16387.8	15319.3	15915.7	16386.1	3.07382	1.3322	1.02756	-1.05808	-1.12685
	845.701	844,6928@26,35	114054	150436	76935.5	152942	146917	145193	109430	104398	108355	117305	120594	109245	107895	102740	104585	115086	117016	109913	110112	112917	105563	104621	112942	113276	3.71996	1.30351	-1.05972	1.01675	-1.08313
	846.293	845,2853@23	27864.7	36634.5	19947.9	37023.9	37739.2	38510.7	28506.8	27799	26247.3	29460.4	27926.4	29803.7	28172.6	27147.8	26729.8	29459.5	30053.9	29358.3	29439.5	30559.5	29377	29387.5	28409.6	30795.8	2.42948	1.34136	-1.02294	1.03249	-1.02921
	846.755	845,7474@25,34	65076.3	84716.7	47822.4	88573.6	86230.3	86638.7	73368.1	62314.8	67291.2	62966.8	69349.4	67287.9	61548.5	64638.5	63725.5	73409.6	76224.2	69594.8	61079.5	67633.3	63349	61369	70548.3	72213.3	7.94328	1.32299	1.02712	1.01006	-1.04056
	848.771	847,7636@25,91	197499	253568	143029	281303	272147	271906	210887	201954	201359	227190	216137	196858	213114	187576	203486	219628	218927	205688	202378	206800	230438	228159	219109	219285	4.52847	1.38926	1.03384	1.07758	1.01697
	850.251	849,2435@11,31	5787.44	10599	5347.58	9081.13	11515.5	10573.3	4368.14	8704.04	6770.49	6354.66	7067.58	6984.66	5101.91	7268.3	2044.7	8843.48	8757.11	10723.5	11064.5	9555.69	8207.01	7377.52	7998.09	7059.43	15.7071	1.43416	-1.09532	-1.06503	-1.50774
	850.787	849,7792@26,83	484922	624028	358078	668054	640760	659463	508316	479808	498938	530522	490468	490002	496847	471950	482143	547863	531639	510720	495196	516951	535065	528716	546393	537624	3.27178	1.34168	1.01366	1.02997	-1.01109
	852.803	851,7948@27,87	106700	139021	77131.6	143125	137419	149640	112999	103011	112410	121449	98730.2	105243	109028	102635	106104	124472	124556	111859	115136	111157	129095	121179	128008	119810	5.51687	1.33245	1.01725	1.00796	-1.016
	853.17	852,1624@21,58	7301.27	6557.42	2415.52	4973.9	1957.7	8589.57	5373.7	4273.82	4674.21	3733.4	3990.42	718.852	3182.6	5577.81	2305.48	12115.6	12459.8	12313.4	12058.7	12531.4	11968.9	11840.7	12085.5	11880.4	2.02185	-1.04852	-1.13633	-1.92761	-1.47067
	853.669	852,661@24,79	15581.3	22097	11731.2	21332.9	21428.6	22482	16965.9	15415.1	16634.8	17357	17760.4	16695.7	15801.9	16176.9	15548.4	17039.1	15838.9	16846.4	16421.7	16522.5	15537.4	17277.2	16635.7	16592.9	3.31966	1.32046	-1.00803	1.04865	-1.0396
	853.726	852,7185@25,92	62046.2	78607.7	43946.5	82648.6	79246	82739.6	61445.8	58525.8	60701.4	64530.2	59895.6	64394.1	61063.9	58232.3	59263.4	64596	64954.8	59810.3	61426.6	64438.6	61605.9	63547.9	64144.4	64509.8	2.8765	1.32521	-1.02174	1.02286	-1.03383
	855.685	854,6774@25,43	52513	65845.2	37974.5	69999.5	66288	74395.5	55316.9	48767.4	52456.3	58053.8	54775.6	52364.4	54107.2	44665.8	51765.9	57494.6	45007.5	44072.8	55414.8	49581.9	42851	48898.4	50948.6	44153.6	10.7217	1.34766	1.00133	1.05668	-1.03849
	855.742	854,7345@26,83	124326	163733	92715.2	168790	166275	170822	127956	124318	128085	136239	127687	131135	127174	122414	123095	136597	135180	131163	128866	132578	127405	130711	133781	134102	2.26558	1.32858	-1.00109	1.03752	-1.02171
	857.7	856,6925@26,14	74405.1	96898.2	51087.7	95135	93281.6	92338.7	72057.5	71536.3	70735.2	83148.5	71158.4	77180.9	71856.6	69908.9	68392	75015	80683.3	71945.1	71860.7	76246.8	70880.1	61807.6	71192.7	74438.6	7.05312	1.26244	-1.03762	1.0409	-1.05821
	859.252	858,2442@21,58	12067.5	10678.8	3832.34	8335.77	3816.61	14457.8	8782.25	7144.07	7903.25	6924.41	6813.47	2610.2	5422.32	9207.12	3819.45	19699.4	19922.5	19599.4	19698.4	20298.8	18973.6	19346.6	19776.1	19642.9	1.85726	1.00119	-1.11536	-1.62579	-1.44066
	859.716	858,708@27,06	35358.9	46032.6	26039.3	47312.6	47670.4	49242.7	35927.5	35102.9	35774.6	37372.4	36411.7	35333.9	40179.5	34519.2	35766.3	37494.9	38773.3	41732.9	37668.2	37887	34190.6	35942.6	36280.1	37666.3	5.54419	1.3425	-1.00586	1.0157	1.02824
	862.787	861,779@26,62	48479.3	64377.2	37222.4	69136.2	65313.2	68514	55967.4	47762.2	50633.4	55189.6	53381.3	52350.5	51862.4	48764.2	49270.6	54813.2	54737.5	52364.7	50101.5	52846.2	56217.1	57310	55997.2	57735.1	4.57455	1.35238	1.02854	1.07224	-1.00121
	863.637	862,6296@22,86	9841.91	14154.3	6384.34	14959	12820	13238.1	9270.3	10294	10316.8	9526.4	8621.86	9240.16	10185.1	8678.06	10421.4	11095.6	10044.9	9380.95	9716.28	10273.2	10139.2	9573.2	11018.5	11245.7	6.74518	1.35011	-1.01672	-1.10925	-1.03743
	864.803	863,7948@27,59	60789.2	82646.7	46882.4	86139.7	84653.2	83434.8	65100.2	64359.3	64075	67704.6	63140.3	61755.8	64440.2	60104.3	64186	68037	66316.8	64841.5	62690.6	64129	70122.1	66956.4	68225	68003.7	3.51256	1.3358	1.0169	1.01199	-1.00841
	866.818	865,8098@28,67	26098.5	35632.9	18524.9	34780.4	36173.8	34823.9	28112.4	26525.7	26022	29321.6	28641.6	27764.9	26420.6	24562.3	24962.4	27747.3	29981.1	28926.5	26703.1	27126.7	29853.8	29310.5	30995.5	28836.5	4.88979	1.31801	1.00503	1.06818	-1.05676
	867.685	866,6768@25,35	44191.1	57747.2	32969.4	63460.3	59442.1	62370	45985.3	39531.3	47225.9	50000.5	44756.7	44129.1	46080.6	43573.8	43560.5	48486.5	48034	45248.8	46160.5	44536.5	42628	46137.6	47269.1	47566.6	4.04904	1.37333	-1.01631	1.02949	-1.01271
	869.701	868,6928@25,92	139437	180948	102451	191639	183362	188262	149041	137418	142041	151663	147945	146750	140217	134128	143806	150542	153679	145045	142866	148326	139618	145235	148111	155512	3.44664	1.33211	1.0134	1.05563	-1.01121
	871.716	870,7085@26,83	294222	389394	220402	404231	400733	406021	309550	296403	309193	332137	312961	308449	303793	290831	296220	319890	324215	311884	307528	311427	294265	305258	312003	317856	2.83571	1.33956	1.01231	1.05479	-1.01479
	872.771	871,7633@25,44	43714.9	51263.3	29380.4	50571.4	51296.3	49346.8	44569.4	44271.8	41845.3	40411.1	36343.8	38861.1	38338.1	39452	34996.2	32306.6	39794	38564.4	43655.5	40578	34110.1	33711.8	45594.7	31824.9	13.346	1.21596	1.05088	-1.07562	-1.1026
	873.268	872,2597@21,58	15332.8	14868	5151.16	10750.2	4474.84	19275.6	11202.8	9042	10291.5	7995.04	8401.61	923.453	7282	12438.1	5102.41	24145.3	24862.6	25274.9	25500.1	26837.4	23340.1	23913.9	24336.1	23912	4.3191	-1.02467	-1.15771	-2.04109	-1.42419
	873.732	872,7237@27,87	78196.3	101671	57815.2	101245	99991.3	110942	80645.2	81273	76591.5	77396.1	80320	83205.2	77706.6	77383.5	74301.3	84708.4	83938.2	80471.6	84252.1	83827.6	83615.6	81550	85824.8	85932.4	2.14613	1.31343	1.00348	1.01363	-1.03614
	874.787	873,7789@26,32	117774	151184	86092.5	160021	153911	161065	119702	113162	122414	127535	109693	117775	119379	113060	114635	131640	127810	126193	119164	113446	116570	130631	136683	131887	6.26536	1.33783	1.00064	-1.00013	-1.02298
	875.788	874,7797@26,32	47126	64162.6	34499.1	62416.2	61137.2	63437.1	41067.7	45941.8	41826	49112.9	49184.4	45666.6	46897.3	45953.8	45629.4	51615.2	52663.9	51355.6	51736.7	53353	54522.1	54817.3	56259.1	55970.5	3.51641	1.28262	-1.13158	-1.01267	-1.05277
	876.803	875,7948@27,34	336225	441218	262126	479279	467804	465576	358606	344483	353616	379634	352420	362398	364725	324546	352072	360247	356159	347380	333817	342048	380088	368405	374280	364620	4.25562	1.35889	1.01648	1.0528	1.00171
	878.818	877,8105@28,41	494077	637097	362890	657266	648435	667233	512187	480549	501153	531549	507945	495144	499965	470051	481115	535545	530564	522840	499885	508649	577117	563523	568760	553175	5.04057	1.32051	-1.00012	1.02716	-1.02959
	879.742	878,7344@26,32	36385.2	47362.9	26466	43985.4	48253.5	49587.4	37269.9	36562.1	36506.9	39578.1	37398.3	37751	36252.2	35791.7	35615.2	38813.3	39834.4	37703.3	37087.6	38221.9	38327.5	36829.9	38815.2	39453.8	2.63916	1.28682	1.00113	1.04095	-1.02373
	880.834	879,8258@29,46	62436.3	81120.5	47078.4	88326.3	90139.6	83584.7	67931.2	63588.7	65019.1	71031.1	64254.3	69802	66465.6	60002.8	67900	68601	66811.5	66513.9	62824.9	57991.9	70583.3	71291.5	71939.3	69652.6	6.70057	1.37462	1.03097	1.07581	1.01958
	881.7	880,6924@25,93	16310.6	19788.9	11748.9	20766.9	19274.7	19339.5	15072.9	16097.9	17133.6	16899.1	15997.2	16613.1	18143.8	14148.5	16294.5	14284.9	16631.9	15672.2	15906.8	16432.9	14440.9	15564.3	15474.8	16571.3	5.46086	1.24103	1.00953	1.03471	1.01543
	881.758	880,7501@27,34	98645.3	131196	75411.8	138628	135600	138081	104029	99573.6	102674	109112	103466	107141	101645	97758.3	100393	105566	106726	104039	101319	106093	104660	102565	105593	104776	1.65345	1.35071	1.00335	1.04739	-1.0182
	882.57	881,5623@1,48	2809.43	4849.87	2592.82	1171.83	839.042	1508	2870.25	2112.38	2616.27	2433.68	1952.45	69.6838	2709.85	4995.33	2220.45	2071.68	2324.77	2208.17	2239.31	2374.3	2018.7	2304.37	2126.49	2089.57	5.69829	-2.91348	-1.34916	-2.30084	-1.03289
	883.716	882,7081@26,61	36740.9	48917.4	26782.1	52233.9	49994.4	50474.9	36729	38608.9	38364.6	41170.3	35614	38211.8	36829.2	34812.8	36595.7	40127.1	40367.2	39336.6	37769.1	39243.9	38824.9	39376.5	38233	40492.5	2.37337	1.35808	1.01122	1.02273	-1.03883
	883.774	882,7658@28,41	129874	167780	96997.6	169537	172576	176972	130091	128951	133304	139739	134971	134765	133487	122507	129478	142111	141154	135667	134658	136502	141753	139791	144592	143146	2.51901	1.3153	-1.00588	1.03756	-1.02382
	885.732	884,7237@27,6	47967.9	66085	36902.4	65734.4	70100.5	67939.6	53786.7	51298.5	55353.4	53423.4	52693.8	49849.1	55662.8	49536.5	49290.9	48261.4	52521.8	49753.1	49944.5	51524.1	50111.7	49538.1	51985.8	52985.2	3.11421	1.3499	1.06282	1.03319	1.02342
	889.234	888,2257@22,4	757765	821889	286863	596500	213704	955875	613634	508248	560976	498643	517250	104146	393159	659528	242557	965572	968619	972868	972947	993569	969422	964809	965763	970453	0.90429	-1.05687	-1.10914	-1.66647	-1.44106
	890.818	889,8101@28,15	24981.1	31989.3	19588.6	36224.5	33456.4	37904.7	27728.5	24584	25633.5	29299.6	27689	25344.5	26683.6	26169.7	25476.9	30363.4	28449.7	28967.2	26557.8	28204.7	31034.6	29357.6	31619.4	29873.9	5.29279	1.40526	1.01812	1.07542	1.02314
	891.669	890,661@23,63	10559.4	20085	9478.55	17310.2	18096.5	22703.1	11168.2	14017.8	15124.8	18616.3	13058.1	11776.2	12007.4	11490.6	14047	14588.4	13800.5	11566.2	14534.9	14289.4	15962.4	11001.7	13174.9	12957	11.4991	1.44829	1.00468	1.08294	-1.06866
	892.232	891,2245@22,4	3650.11	3387.03	1282.7	2296.82	976.021	4383.68	2466.17	2121.14	2395.01	1956.88	2182.27	447.075	1565.25	2882.22	883.505	6000.55	6102.36	5990.52	6144.89	6629.07	5601.38	5636.97	5856.46	5800.62	5.20051	-1.08663	-1.19156	-1.81409	-1.56066
	892.834	891,8257@29,2	29156.1	35546.8	21190.9	40042.9	39865.1	38926	30168.3	29336.4	29888	31568.5	30241.8	28698.4	30029.4	28042.6	29171.8	31905.7	27092.9	30084.6	29337.1	29783.2	34576	33127.3	32078.3	30303.6	7.23824	1.3835	1.04074	1.05373	1.01572
	893.701	892,6928@25,44	29186.9	40085.9	22441.5	41862.1	40830.6	41149.5	31825.2	30778.4	29893	32883.5	31570.5	30869.9	31390	27794.4	29247.5	33447.8	33584.5	28236.5	32339	32991.2	29570.2	31148	31211.7	33373.1	5.94326	1.35031	1.00853	1.03936	-1.03712
	894.849	893,8411@30,23	16287.6	20852.3	11907.8	21307.5	21203.7	22504.9	16776.6	15870	16025.9	17155.2	16979.8	16239.4	15889.8	15388	16002.7	17648.3	17798.6	17530.8	17047.9	16373.4	19032.8	19153.5	17881.1	17451.6	4.94136	1.32557	-1.00771	1.02705	-1.03738
	895.716	894,7085@26,33	88558.9	113464	65054.8	117625	118218	122501	90419.3	87732.4	93197.1	96287.1	91656.9	90853.5	85327.7	84414	86260.3	92682.8	95527.5	88708.6	89386.5	93236.5	85839	88759.7	91350	92742.6	3.27529	1.34172	1.01599	1.04388	-1.04326
	895.773	894,7648@28,15	8878.54	11529.2	6399.34	11323	10704.4	11640.2	8626.95	8884.87	8631.35	9675.54	8798.15	9285.34	8999.37	8188.89	9046.68	9858.03	9737.03	8589.72	9081.04	9278.52	9444.68	9054.39	9543.07	9548.8	4.20545	1.25592	-1.02539	1.03551	-1.02181
	897.732	896,7242@27,34	248561	327868	190070	341638	338847	346656	263086	256563	259741	277834	264833	264232	261902	243099	249291	263938	271674	261151	259805	266641	251505	254664	262333	261647	2.28744	1.34004	1.01682	1.05271	-1.01618
	898.77	897,7623@24,44	18541.1	25576.4	13317.5	30821.2	31920.6	32383.5	21217.9	20829.7	21769.6	25833.6	23270.2	23272.7	21964.1	20155.2	21554.6	23659.4	21767.1	22811.6	21649.5	21056.1	25959.7	24907.6	21964.5	23233.3	7.06379	1.65623	1.11112	1.26015	1.10863
	898.77	897,7623@24,44	20567.1	26919.5	15828.1	27223.9	27262.8	27109.9	21618.9	21099.8	23327.7	23319.5	23054	23450.7	22436.4	20450.1	20950	23874.2	21951.8	23596.4	22580.9	20963.1	26287.7	26414.1	25146	24264	7.82311	1.28875	1.04314	1.10281	1.00824
	898.772	897,7643@24,44	19808.4	26794.4	16330.2	30630.8	28948.8	27443.1	24425.6	22727.2	23927.7	22093.4	22237.3	22778	21673	19923.4	22289.8	19875.1	18990.3	21600.3	19848.2	19924.9	23058.5	21000.3	20424.4	20838.8	5.79682	1.38278	1.12946	1.06635	1.01515
	899.747	898,7396@28,41	362107	482449	268014	488225	483841	502236	373512	362664	367217	390419	384245	383269	372525	357091	362326	394205	396925	387087	382870	387716	393240	391989	398734	400989	1.50396	1.32513	-1.00832	1.04077	-1.01889
	900.802	899,7944@26,79	66290.8	81927.3	43381.3	86550.9	82979.8	85831.5	62581.9	66779.3	64744.6	70960.1	62730.1	62967.7	66474	61351.9	61841.2	70084.3	70921.9	66630.6	63986.7	66996.5	69663	70626.7	71139.2	70730.5	3.63468	1.33279	1.01308	1.0264	-1.01019
	901.763	900,755@29,47	61188.2	81010.8	48478.6	86207.4	85322.6	87200.5	63229.3	64212.5	65336.4	68487.5	66401.4	67881.1	62358.8	61042.2	61729.6	67350.5	66837	65518.1	65609.4	65561	65885.7	66123.1	66632.5	68837.5	1.6369	1.3569	1.01102	1.06342	-1.02996
	902.818	901,8103@27,88	139570	177532	103053	188756	182264	191384	143467	140794	141641	151747	141174	139404	142679	134681	137111	154519	154553	149138	143848	146734	160520	158873	159589	156067	3.85666	1.33856	1.01368	1.02896	-1.01371
	904.834	903,826@28,95	130245	171800	96307.3	179416	174572	179450	135340	129949	135301	144914	135600	133480	131543	122461	131376	148084	145098	139199	135389	135916	155982	150925	152377	150557	5.14445	1.33911	1.00562	1.03927	-1.03366
	906.85	905,8419@29,96	246010	316477	181293	328079	326118	333204	258532	238216	251523	264250	253910	251683	247819	236929	239335	278213	267618	263589	252873	252416	293503	280074	282417	279025	5.13527	1.32754	1.00604	1.03504	-1.0272
	907.773	906,7653@27,88	43015	57286.3	31977.4	57216.4	58107.1	60141.7	44281	43682.9	43528	45661.4	44287.5	46033	44452.3	41604.6	43547.8	46823.7	46188.7	46878.8	42843.5	46865.3	45864.5	46507.8	46344	47581.3	2.93275	1.32648	-1.00598	1.028	-1.02063
	908.859	907,8514@30,92	37529.5	48770.3	28009.8	51739	51322.7	48756.9	39509.8	36594.9	36795.5	41711.4	38110.4	37669.3	36764.5	35247.8	37575.3	43358.1	41221.5	40570.9	40586.2	40777.7	43442	41215.1	42661.1	43029.2	2.92896	1.32813	-1.01248	1.02783	-1.04309
	909.789	908,7812@28,95	44363.4	56544.4	31150.2	58846.3	59780.1	60828.4	45603.6	44321.6	44503.3	48320.7	45864.1	45536.3	43958.5	40976.7	42055	47420.6	47725.8	44989.3	44386	46583.4	45319.3	47113	46814	47153.6	2.56127	1.35891	1.01795	1.05803	-1.03991
	911.805	910,7972@29,96	64442.9	83419.3	48424.4	87441	84890.3	87282.9	66240.6	63970.7	64918.6	69476	66438	67990.7	64157.6	62054.1	64154	70042.4	68972	66641.5	65299.5	67989.6	69232.6	68380.5	69000.5	70177	2.31739	1.32263	-1.00593	1.03881	-1.0311
	913.82	912,812@30,91	9311.37	11693.2	6755.19	12599.8	13044.1	12965.4	9761.05	9364.56	9965.27	10449	9855.03	9120.72	9550.08	9111.6	9414.58	10196.9	10443	10135.1	9645.62	10524.1	9710.01	9615.99	9705.36	9647.35	3.69062	1.39084	1.04795	1.05998	1.0114
	918.849	917,8408@29,72	9691.07	11591.2	6864.59	12623.2	12962.6	13163.4	9606.39	9377.21	7475.26	10310.5	9728.28	10050.2	9553.04	7609.18	3425.54	11046.5	10623.4	10198.3	9516.22	9443.74	11171.8	10783.1	10593.3	10708.1	5.90911	1.37668	-1.0638	1.069	-1.36717
	919.701	918,6928@24,45	21015.6	30010.3	14410	30938.7	29220.1	32214	20927.9	22412.8	21252.9	24787	25192.5	23747.2	23038	23274.6	22410.3	24130.5	24621.3	24408.7	23714.3	23398.1	24361.3	24409.1	25611.8	24123.8	2.54712	1.41165	-1.01304	1.1267	1.05023
	919.701	918,6928@24,45	21015.6	29714.6	14376.3	29337.6	27188.1	26899.7	24676	23334.9	24631	24836	25336.8	23829.8	21703	22965.1	22157.1	23487.7	21199.9	23930	21593.2	21615.7	23262.9	23832.9	23360.3	22723.4	4.59545	1.28137	1.11574	1.13664	1.0264
	919.716	918,7081@25,85	27721.6	37444.6	19112.7	38119.6	38010	36266.8	28467	30814.7	27185.1	28471.5	30112	29262.8	28314.8	27752.6	27567.2	30334.1	30493.2	29521.5	29389	30947	27114.4	28809.4	28439	30543.2	4.17952	1.33362	1.02596	1.04233	-1.0077
	920.312	919,3038@24	25315.2	30919.7	17824.7	33483	31713.9	33528.7	24269	24469.1	25168.4	26491.8	25635.8	25453	24728.3	23311.9	24721.1	26239.9	27002.5	26814.6	24699.7	26607.3	26501.7	26644.1	26786.5	26109.6	2.61068	1.33306	-1.00207	1.04754	-1.01784
	920.864	919,8566@30,95	16466.9	21406.7	12448.1	23337.8	22583.6	21948	17680.2	16442.3	17403.9	18522.9	16900.4	17906.1	16303.5	16281.3	16522.8	19006.3	18393.5	17615.2	17073.3	17327.9	19806.4	19014.8	18636.4	18436	4.83008	1.34871	1.02394	1.05977	-1.02472
	921.732	920,7238@26,79	46256.1	60386	34710	62706	60593.3	60757.6	46780.5	47319.7	43685	49400.9	47656.8	48517.2	47528.6	45796.8	45340.4	47448.4	49018.3	47143.4	48190.6	48582.2	43458.4	45901.1	47347.9	48737.9	3.67742	1.30212	-1.02589	1.02987	-1.01937
	923.748	922,7397@27,88	115926	152856	84715.3	152889	153084	158922	116130	120184	115252	123465	117287	122348	115656	112768	113329	124879	125487	119504	121814	123722	125609	124528	127689	123821	1.899	1.31513	-1.00549	1.02717	-1.03436
	924.27	923,2622@14,55	5562.53	9860.04	4758.6	8092.27	8642.48	10259.2	4733.3	7745.83	6281.4	5083.41	6703.31	6726.95	4011.21	6195.39	2123.11	7327.72	8034.2	10404.9	9782.69	9778.56	6969.88	6857.92	7088.41	6052.91	19.4632	1.33758	-1.07572	-1.09007	-1.63679
	924.787	923,7788@24,78	21818.6	27287.8	16104.4	27906.4	26651.7	28553.5	22096.6	20411.5	22666.4	23284.8	21775.4	21283.8	22728.6	20805.3	20843.3	25621.6	23974.3	21211.1	20030.6	21488.7	24491.2	23569.8	23763.7	22363.5	7.80112	1.27451	-1.00056	1.01738	-1.01295
	925.763	924,7554@28,95	130723	174172	96615.7	174144	179500	178315	135653	133706	132281	139986	137510	138344	129483	125688	128675	141606	142576	136771	138266	140523	143001	139265	144310	139952	1.71681	1.32489	1.00032	1.03569	-1.04602
	927.189	926,1808@22,4	9618.56	8471.98	2867.66	5667.63	2795.04	11314	7256.15	5304.54	5919.37	5086.71	5373.1	1228.38	4099.38	7290.7	2766.88	15925.7	15860.5	15938.4	16067.1	16508.8	15279.1	14830.8	15855.5	15571.8	3.06257	-1.05974	-1.1341	-1.79311	-1.48042
	930.849	929,8412@29,43	11554.3	14806.7	8796.18	15389.1	16592.1	16904.3	12878.2	11764.7	11724	13079.4	11511.6	12933.9	12094.4	10583.8	12155	12841.8	11391	11796.8	11393.7	12154	12512.3	13126.8	13032.3	11411.8	5.91098	1.39048	1.03441	1.06735	-1.0093
	932.865	931,8568@30,47	22946.1	29398	16322.5	30241.5	26467.9	27622.3	22549.4	17568.6	21908.1	23550.5	19238	22025.9	22616.7	21978.7	22121.2	24750.2	23386.7	22608.7	17949.3	23509.3	26886.3	22253	23455.7	25069.1	10.545	1.22813	-1.10706	-1.05944	-1.02923
	933.27	932,2626@22,4	13259.3	11955.8	4040.83	8523.37	3825.63	15519.9	9131.03	7255.41	8121.46	7570.32	7338.22	2072.07	5790.05	10024.1	3878.28	20742.6	20986.8	20608.9	20049.4	21307.9	20483.2	20047.9	20948.3	20239.7	2.13241	-1.04977	-1.19374	-1.7229	-1.48564
	945.716	944,7086@24,78	20862.4	25191.1	13898.7	28499.9	28215	27338.5	22093.5	20184.6	21459.4	23760.5	20722.3	21406.5	20603.8	19078.7	20467.2	24409.1	23805.4	23251.5	22354.9	21896.4	21659.7	23151.9	23429.9	23402.2	3.90716	1.40201	1.06314	1.09903	1.0033
	947.221	946,213@23,28	4778.39	4711.91	1487.91	3202.37	1336.18	5532.39	3108.35	2663.44	2871.76	2636.72	2833.57	544.798	1997.94	3619.44	1283.22	7450.84	7581.26	7766.74	7931.11	8226.14	7331.2	7136.46	7109.55	7459.16	4.86606	-1.09009	-1.2701	-1.82511	-1.59091
	947.286	946,2783@22,4	23756.3	21891.6	7490.8	15609.2	7068.21	28520.2	15964.4	13225.8	14811.4	12902.7	14059.6	2754.02	10421.2	18207.7	7272.85	34830.1	35595.9	36193.7	35742.6	38449.2	34678.7	33725	35730.7	35526.3	3.64407	-1.03791	-1.20766	-1.7882	-1.48012
	947.732	946,7238@25,32	6517.92	9028.06	5386.39	8400.24	9526.62	9605.22	6984.96	6681.8	6461.78	8219.64	8079.08	8571.11	6706.76	6646.66	7541.53	8881.58	6381.15	6934.46	6857.47	7359.67	7150.6	6117.07	6737.36	6858.24	11.1993	1.31529	-1.03993	1.1881	-1.00179
	950.286	949,2777@22,4	5969.03	5556.61	2008.14	4102.4	1992.9	7368.39	4173.32	3495.09	3763.93	3188.89	3591.99	783.994	2796.35	4640.17	1860.7	8763.87	8920.28	8789.98	8904.17	9631.43	8657.53	8360.91	8687.34	8622.2	3.95678	-1.00521	-1.18381	-1.78903	-1.45568
	953.794	952,7864@30,48	21728	27087.7	16138.7	25120.5	28951.9	29961.5	19186.9	21473.8	19701.8	22505	21779.3	22889.4	21848.5	15379.2	22196.9	12797.2	19194.6	22546.5	20929.6	22860.4	18382.8	14589.7	22776.6	19672.4	18.6243	1.29374	-1.07607	1.03417	-1.09305
	963.253	962,2448@23,28	837731	873643	297090	621807	212663	1.04878e+06	652476	533408	607363	528825	556909	100153	413883	710730	253845	1.06845e+06	1.07575e+06	1.08083e+06	1.08405e+06	1.10109e+06	1.06489e+06	1.06911e+06	1.07473e+06	1.07272e+06	1.01262	-1.06649	-1.12002	-1.69364	-1.45704
	975.763	974,7551@26,81	5522.2	7523.83	4064.78	8012.41	7973.44	8217.64	5838.25	5808.48	6349.91	6812.13	5786.7	6505.81	6017.18	5008.67	6344.71	6456.99	5695.59	5500.87	5951.25	5781.15	3160.32	6153.8	6203.13	6211.76	17.441	1.41452	1.05177	1.11653	1.01518
	994.331	993,3228@25,21	23101	29503.8	16795.3	30997.6	30593.2	31515.6	22360.2	22489.3	22515.1	24746.2	23629	23235.5	22790.6	23226.2	22515	24781.2	25350.4	24547.6	23963.9	24347.3	24253	24170.3	25504.9	25120.7	2.22786	1.34159	-1.03021	1.03185	-1.01267
	1001.21	1000,1997@23,28	14337.5	13017.1	4319.96	9264.05	3600.7	17234.1	9837.89	7714.06	9032.12	7760.64	8098.83	1904.84	6316.78	11249.2	4052.69	24335	24252.3	23937	24195.9	24028.3	23158.1	23464.7	23761.5	23566.6	1.67095	-1.05235	-1.19149	-1.78304	-1.46515
	1007.29	1006,2811@23,28	15270.3	14057.1	4813.1	10210.9	4134	18446.4	10759.1	8359.34	10045.8	8701.61	8830.11	2399.37	6797.35	11914.8	4706.76	23607.1	24172.5	23880.9	23109.4	24000	23669.5	23858.6	24782.1	23622.8	1.92534	-1.04114	-1.17063	-1.71293	-1.45781
	1021.3	1020,2971@23,28	28930.1	26506.1	9063.3	19228.3	8432.3	34551.4	20501.4	16167.7	18376.5	16220.2	17652.8	4496.78	12884.6	22649	8317.13	42297.4	43440.2	43602	43811.8	45714.3	41547.1	41643.8	42877.9	41290.6	3.2848	-1.03677	-1.17175	-1.681	-1.47089
	1024.3	1023,2964@23,28	8346.13	7749.12	2809.24	5765.83	2420.61	10140.8	5963.64	4912.09	5661.89	4798.56	5317.36	1357.18	3959.52	6466.36	2600.41	12273.2	12514.1	12115.6	12227.2	12856.4	11764.6	11930.9	12545.1	11742.4	3.07592	-1.0315	-1.14312	-1.64772	-1.45126
	1037.27	1036,2635@24,34	1.15923e+06	1.13829e+06	375210	795506	276921	1.40233e+06	872544	687416	805708	691192	708812	132669	513189	953882	309825	1.5287e+06	1.55591e+06	1.54732e+06	1.55727e+06	1.58794e+06	1.54217e+06	1.53562e+06	1.53742e+06	1.54052e+06	1.13542	-1.07999	-1.1298	-1.74383	-1.50416
	1054.3	1053,29@24,34	624099	624700	209636	444152	154174	761969	479756	379836	445949	383153	392860	71365.7	286240	521734	172655	799861	813843	810451	814782	828614	809525	807397	805808	808123	0.982038	-1.07215	-1.11711	-1.72111	-1.48724
	1068.35	1067,3416@26,74	18854	25464.6	14252.7	25973.4	25881.6	26930.6	19415.5	18874.6	18731.8	19999.8	19426.4	20079.6	19816.8	19489.4	19143.1	21301.9	21513.5	20358.2	19828.6	20755	21251.3	19831.4	20463	20925	2.99276	1.34512	-1.02717	1.01595	-1.00209
	1072.31	1071,2997@20,33	6230.35	8414.78	3835.58	6781.5	7493.86	8826.22	5108.05	7445.64	6667.65	4148.2	6796.85	5813.96	3638.6	4824.99	2943.93	6192.41	7544.16	8967.9	8151.73	9134.37	6447.63	6499.53	6320.14	5677.64	17.7041	1.25004	1.04008	-1.10273	-1.62005
	1075.23	1074,2184@24,34	17819.8	14969.2	5250.36	11175.8	4450.01	21013	12200.1	9334.27	11370.3	9262.66	9630.55	2255.28	6998.16	13181.5	4533.2	29285.2	29489	29430.4	28998.7	30329	27977.6	28304.1	28702.1	28460.8	2.49309	-1.03822	-1.15605	-1.79868	-1.53925
	1081.31	1080,3004@24,34	24237.4	20811.4	7378.24	16157.8	6476.71	27131.1	17323.7	13135.5	15530.9	13721.6	13247.1	3797.92	10656.6	18103.6	6964.61	36427.6	37698.9	35036.6	35179.2	37323.8	36036.3	35977.2	35102.5	35950.8	2.62446	-1.05348	-1.13997	-1.70402	-1.46753
	1095.32	1094,3155@24,34	42872	39159.5	13716.1	29367.5	13094.7	46868.2	31017.6	23914.7	29044.2	25426.6	24397.3	7001.35	19673.3	33487.6	12778	63290.6	64750.2	60714.5	62324.1	67188.1	60478	60119.8	57374.9	61049.3	4.6384	-1.07184	-1.14017	-1.68495	-1.45207
	1111.29	1110,2814@25,68	12179	11394.8	4029.49	7584.46	3345.33	14861.9	8164.86	7014.17	8056.66	6737.33	7416.71	1967.97	5145.62	9620.9	3324.27	20309.9	19902.6	20079.7	20918.6	22267.6	19062.5	18815.9	19664.4	19398	5.24206	-1.07024	-1.18797	-1.71215	-1.52582
	1128.32	1127,3087@25,69	1.23447e+06	1.14844e+06	373788	778121	272119	1.4785e+06	884147	693320	829380	686958	720967	137299	500587	986991	297729	1.69909e+06	1.7243e+06	1.72314e+06	1.72659e+06	1.7672e+06	1.70481e+06	1.70284e+06	1.72086e+06	1.70529e+06	1.21227	-1.09015	-1.14536	-1.78401	-1.5441
	1142.37	1141,36@28,64	18688.1	25570.8	13774	25702.8	25709	26026	19692.2	18767.6	19270.5	20704.6	20307.9	20624.1	19341.7	18826.7	19222.1	20947.5	21221.6	20499	19261.7	20899.9	21082.5	20815	21069.2	20128.6	3.00804	1.33438	-1.00524	1.0621	-1.01119
	1149.25	1148,2372@25,69	19705	16318	5647.56	11843.6	4882.11	22458.4	13502.2	10035.8	12945.4	10571.6	10733.9	2614.67	7879.36	14504.2	4810.54	32989	34005.9	32893	32401.9	34374.8	31466.2	31780.9	32071.9	32756.6	2.9493	-1.06346	-1.14218	-1.74207	-1.53234
	1155.33	1154,3187@25,69	26870.8	23697.4	8565.81	17814.9	7314.83	31715.8	19442.2	14843.1	18334.2	15461.5	15469.3	4094.05	11881.4	20673	7576.9	41646.1	41666.8	40186	39951.8	41287.2	41633.6	41017.6	41933.7	40589.2	1.73239	-1.04026	-1.1238	-1.68834	-1.47351
	1165.75	1164,7404@2,18	2594.52	5611.92	4178.41	2129.89	1799.74	2470.53	3037.73	1914.94	2458.58	2218.14	2153.66	211.804	2814.85	4146.81	1949.14	2261.27	2658.25	2721.43	2415.49	2894.04	2778.24	2247.89	2533.67	2635.08	8.77667	-1.93509	-1.67109	-2.70199	-1.38987
	1169.34	1168,3349@25,68	50017.8	46488.6	16500.8	35255.3	15440.3	60984.7	37180.3	30162	33898.5	30097.6	31116.7	8425.46	23081.4	39793.2	15167	73577.3	74775.5	74502.4	74270.1	77868	72239.2	71096	73359.9	72432.9	2.62751	-1.01188	-1.11622	-1.62274	-1.44804
	1185.31	1184,3006@27,45	7573.2	6689.34	2281.03	4491.66	1986	8568.95	4861.1	4067.21	4766.86	3956.01	4271.38	1118.73	3041.18	5917.95	2010.69	11381.6	11667.8	11501.9	11978.1	12896.2	10895.5	10438.8	11240.1	11245.3	6.03699	-1.09949	-1.20799	-1.7701	-1.5081

## Sheet: OF
Name	Class	Feature
PG(16:0/0:0)	Glycerophospholipids	484.283@1.89	1.6215	-1.31677	-2.34532	-1.76765
PG(16:0/0:0)	Glycerophospholipids	522.2387@1.89	1.62683	-1.24344	-2.31169	-1.7227
PG(20:5(5Z,8Z,11Z,14Z,17Z)/0:0)	Glycerophospholipids	530.2669@1.94	-1.26211	-1.51623	-2.6123	-1.67901
PG(15:0/12:0)	Glycerophospholipids	652.434@6.58	-1.2304	-1.48624	-2.29138	-1.69032
PG(15:0/14:0)	Glycerophospholipids	662.4467@16.03	1.12563	-1.1186	-1.86348	-1.2673
PG(14:1(9Z)/17:0)	Glycerophospholipids	706.4841@16.02	1.03363	-1.21868	-2.15111	-1.45527
PE(P-16:0/17:2(9Z,12Z))	Glycerophospholipids	707.482@1.44	1.27868	3.5968	6.4568	35.0378
PG(18:1(9Z)/14:0)	Glycerophospholipids	720.4997@16.02	-1.07831	-1.31107	-2.17758	-1.42453
PG	Glycerophospholipids	828.6616@24.98	1.35615	-1.0541	1.02006	1.0148

## Sheet: PE
PE(P-16:0/17:2(9Z,12Z))	27.8683	259.68	545.68	3403.78

## Sheet: byCATEGORY
Category	Feature	prom G1-G5			Category		Percent	Percent W/UK
Fatty Acyls	100.0525@0.97	213.379			Fatty Acyls	1.03456e+06	0.0614304	0.0485795
Fatty Acyls	100.0526@4	11298.4			Prenol Lipids	882194	0.0523832	0.0414249
	104.0736@1.03	11625.4			Sphingolipids	44076.3	0.00261717	0.00206967
	105.058@0.98	216.336			Saccharolipids	13034.9	0.000773992	0.000612077
Fatty Acyls	110.0369@0.96	5698.37			Glycerolipids	1.10603e+07	0.65674	0.519353
Fatty Acyls	110.1096@1.62	4663.54			Sterol Lipids	84033.5	0.00498976	0.00394593
Fatty Acyls	120.0435@1.05	11206.8			Glycerophospholipids	2.43492e+06	0.144581	0.114336
Fatty Acyls	128.0458@4	58521.6			Polyketides	1.28808e+06	0.0764842	0.0604841
Fatty Acyls	128.0473@4	58780.2			total	1.68412e+07
	129.0692@1.09	4522.67
Fatty Acyls	129.1518@0.9	7295.36			Other/Unknown	4.45507e+06		0.209195
	132.0699@1.06	16100
Prenol Lipids	132.0939@1.89	9332.58			total w UK	2.12962e+07
Fatty Acyls	146.058@4	3617.75
	148.016@1.39	8996.98
Fatty Acyls	149.0317@1.06	24971
	157.1581@1.08	2883.68
	165.0692@1.1	12598.3
Fatty Acyls	172.0734@0.96	19806.4
	172.1006@1.06	212.397
Fatty Acyls	188.1048@1.89	7936.71
Fatty Acyls	199.1939@1.41	11528
	200.1072@1.1	9726.21
	200.1079@1.07	526.464
Fatty Acyls	201.173@0.88	2677.49
	206.0251@1.23	4111.46
	206.0251@1.47	4985.14
	206.0251@20.28	1359.48
	206.0255@17.12	1664.83
Fatty Acyls	213.2093@1.66	4369.57
	220.0773@17.13	4376.3
	220.0773@13.82	3965.93
	220.0773@22.4	2108.58
	220.0774@21.58	3649.72
	222.0563@1.9	5749.39
	222.0566@1.23	4121.91
	222.0566@1.47	5685.78
	222.0566@2.65	2576.56
Fatty Acyls	224.1363@1.1	36058.6
Fatty Acyls	224.1427@1.1	19807.3
Sphingolipids	227.2251@1.68	6885.83
Fatty Acyls	241.2408@2	5001.65
Fatty Acyls	254.1672@1.58	1639.02
Fatty Acyls	255.2564@2.28	17547.7
Fatty Acyls	256.2406@2.45	20676.5
Fatty Acyls	257.2358@1.71	2713.17
Fatty Acyls	257.2359@1.54	8277.65
Fatty Acyls	258.1835@4	8618.97
Fatty Acyls	264.2457@2.53	183558
Fatty Acyls	266.2611@3.35	45896.8
Fatty Acyls	269.2722@2.45	6737.04
	272.1593@0.97	386.457
Sphingolipids	273.2672@1.23	2529.46
	280.0439@1.9	5138.68
	280.0439@10.36	4725.05
	280.0441@1.47	5223.93
	280.0441@20.28	6428.51
	280.0441@22.4	1808.66
	280.0443@17.12	3381.15
	280.0443@13.82	4988.16
	280.1024@1.03	329.346
Fatty Acyls	280.1436@1.06	6451.71
Fatty Acyls	282.2563@2.45	18192.6
	282.2876@1.11	1928.83
Fatty Acyls	283.2874@2.94	2413.4
Fatty Acyls	283.2875@3.23	2204.16
Fatty Acyls	289.262@1.31	9886.07
Saccharolipids	294.096@22.4	1215.11
Saccharolipids	294.0965@17.13	1474.41
Fatty Acyls	297.3035@3.36	12555.8
Fatty Acyls	297.3036@3.96	6821.78
Fatty Acyls	303.2542@2.53	3287.85
Fatty Acyls	303.3047@1.05	2674.37
Fatty Acyls	310.2877@3.35	29427.9
Fatty Acyls	311.3189@4.08	4838.92
Fatty Acyls	315.2048@0.97	3968.05
Fatty Acyls	320.3082@4.86	13036.9
Fatty Acyls	320.3085@4.64	91210.5
Fatty Acyls	325.3349@4.84	9509.85
Glycerolipids	330.2775@2.45	29991.8
Fatty Acyls	336.194@1.89	4445.02
Fatty Acyls	337.335@4.86	12827
Fatty Acyls	339.35@6.32	2566.25
	340.0109@20.28	2308.6
	340.0111@17.12	3954.27
Fatty Acyls	353.366@7.6	4923.09
Fatty Acyls	353.3662@6.5	5528.99
	354.0628@20.28	5345.96
	354.0629@13.82	16666
	354.0629@2.65	3402.38
	354.063@22.4	5155.83
	354.063@17.12	9329.35
	354.0631@21.58	11100.5
	354.0631@24.34	1308.97
Fatty Acyls	356.274@2.45	4179.48
Glycerolipids	358.3087@3.35	89035.2
	362.3033@1.92	390.487
Fatty Acyls	367.3816@7.79	2475.32
Fatty Acyls	367.3817@8.61	9470.22
	370.0942@2.65	8079.64
	370.0943@3.9	3631.77
Fatty Acyls	370.3089@4	54318.5
	381.3974@9.14	5788.34
Fatty Acyls	386.1791@1.03	17034.6
	393.3401@7.98	88905.8
Fatty Acyls	408.2646@4	6640.02
	412.1758@1.03	4384.28
	414.0295@10.36	2515.42
	414.0296@20.28	1988.87
	414.0297@13.82	2620.28
Fatty Acyls	414.2037@1.06	74930.7
Fatty Acyls	426.2985@1.54	4789.98
	428.0817@20.28	8227.08
	428.0819@21.58	4203.71
	428.0819@22.4	6548.74
	428.082@17.13	17735.1
	428.082@24.34	1278.75
	428.0821@23.28	3213.18
Sterol Lipids	430.3121@23.36	43184.6
	440.2079@1.06	13769.4
Sterol Lipids	444.3266@2.45	32655.9
Fatty Acyls	452.1669@1.06	3392.09
	452.2119@2.84	7597.68
	470.3246@1.53	6989.27
Prenol Lipids	472.3579@3.35	75009.5
Sterol Lipids	482.2823@2.45	2597.01
Glycerophospholipids	484.283@1.89	43518
Sterol Lipids	484.3531@0.98	5205.44
	488.0483@17.12	2226.78
	488.0486@13.81	2924.23
	502.1003@22.4	1873.87
	502.1004@20.28	13765.8
	502.1004@10.36	5875.39
	502.1006@23.28	3060.97
	502.1007@21.58	4994.1
	502.1016@24.34	3175.11
	505.3601@2.45	3387.76
Polyketides	510.2795@1.89	9056.86
	514.351@1.51	10569.5
Polyketides	518.1319@10.36	37754.9
Polyketides	521.1303@10.36	3844.21
Glycerophospholipids	522.2387@1.89	1635.62
	523.5693@17.11	4768.72
Glycerophospholipids	530.2669@1.94	5561.67
	530.3474@2.45	955.315
	535.5695@20.52	1672.88
	536.5284@12.47	5557.28
	551.6009@19.81	25245.2
	553.1688@2.65	2858.74
	558.377@1.49	11318.7
Polyketides	562.067@17.12	1585.26
Polyketides	562.0671@20.28	1131.86
	562.5439@2.53	22786.1
	564.5594@15.19	7994.84
	576.1193@21.58	6448.02
	576.1193@13.81	9126.18
	576.1194@22.4	1962.18
	576.1196@24.33	1026
Fatty Acyls	576.5121@28.41	11136.4
Glycerolipids	578.5279@18.98	37721.9
	579.1177@13.82	1355.62
	579.6324@21.3	18719.4
	592.1505@13.82	1868.91
Glycerolipids	596.5383@18.97	21937.3
Prenol Lipids	598.3841@1.05	3932.32
	600.3109@2.08	503.652
Saccharolipids	602.4033@1.47	10345.4
Glycerolipids	604.5434@29.96	6845.17
Prenol Lipids	606.3839@16.02	16098.2
Glycerophospholipids	606.4628@16.24	3463.29
Glycerolipids	606.5594@20.89	177500
	607.6636@22.13	49158.6
Polyketides	609.1772@13.82	212886
Polyketides	614.1737@13.82	1922.93
Sterol Lipids	617.3928@1.89	390.579
	627.1875@3.9	6867.84
Glycerophospholipids	634.4941@18.98	6997.85
	635.6944@22.95	7465.63
Glycerolipids	641.5964@20.89	18550.2
	646.4292@1.46	8160.74
Glycerophospholipids	646.452@21.33	234890
Glycerolipids	648.5094@22.34	16126.3
	650.1378@22.4	3185.6
	650.1379@17.12	7809.84
Glycerophospholipids	652.434@6.58	3647.42
	653.1361@17.12	1466.23
Glycerolipids	655.575@20.89	74808.4
Glycerophospholipids	662.4467@16.03	701409
	663.7258@23.87	9285.86
	666.1693@17.12	1613.06
Glycerolipids	668.5407@2.45	8835.42
	674.6692@4.64	7799.03
Glycerophospholipids	680.4132@21.33	16130
Glycerolipids	682.5939@23.36	1.77139e+06
	683.196@17.12	389104
Glycerolipids	683.6066@21.76	90617.7
	689.1913@17.12	1479.5
	697.2482@21.11	56637.4
Glycerolipids	698.5885@21.51	131072
Glycerophospholipids	700.4025@16.02	31565.6
	701.2066@5.77	6957.63
Polyketides	704.125@17.12	940.952
Glycerophospholipids	704.5358@21.77	57597.5
Glycerophospholipids	706.4841@16.02	18718.5
Glycerophospholipids	707.482@1.44	5629.06
Glycerolipids	707.6066@21.53	23187
Glycerolipids	709.6217@22.04	56211.4
Glycerolipids	711.6378@22.54	59290.4
Glycerophospholipids	716.5194@2.45	2314.24
Glycerophospholipids	720.4997@16.02	22853.4
Glycerophospholipids	720.5501@23.36	424869
Polyketides	724.1565@20.28	5418.99
Glycerolipids	724.6035@3.35	31650
Glycerophospholipids	730.5509@22.03	28438.1
Glycerophospholipids	732.5662@22.51	37489.6
Glycerophospholipids	735.5356@16.02	4492.91
Glycerophospholipids	736.5443@21.52	35685.6
Glycerophospholipids	736.5445@23.36	59927.4
Glycerolipids	737.6532@22.75	42821.3
Glycerolipids	739.6692@23.35	106955
Polyketides	740.1883@20.28	470615
Glycerophospholipids	749.515@16.02	7441.34
Glycerophospholipids	751.5077@1.41	3413.86
Glycerolipids	756.5674@22.27	7818.79
Polyketides	757.2151@20.28	445590
Prenol Lipids	758.2157@20.28	254984
Glycerophospholipids	758.5821@22.75	21243.3
Glycerophospholipids	760.5982@23.21	31687.5
Polyketides	763.2101@20.28	2718.11
Glycerophospholipids	763.531@16.02	2168.38
Sphingolipids	767.6267@3.35	8769.54
Glycerolipids	767.7006@24.07	85172
	771.2668@22.09	34087.3
Glycerophospholipids	772.5985@23.08	10875.4
Glycerophospholipids	774.6139@23.59	15239.5
	775.225@8.29	6107.97
Polyketides	778.1436@20.28	2220.69
Sphingolipids	779.5611@16.02	3639.31
Glycerolipids	779.7006@23.97	61152.8
Glycerolipids	781.7161@24.53	64491.8
Polyketides	784.2256@20.28	4044.5
Glycerophospholipids	784.5985@23.03	14617.2
Glycerophospholipids	786.614@23.52	37294.4
Glycerophospholipids	788.6297@24.08	50265.7
Glycerophospholipids	789.5469@16.02	3379.67
Glycerophospholipids	790.4915@16.02	16283.3
Glycerolipids	791.7006@23.91	70892.3
Glycerolipids	793.7169@24.46	144742
Glycerolipids	795.732@25.1	136188
	798.241@20.28	1587.99
Glycerolipids	798.6719@24.47	42224.2
Glycerolipids	799.6166@2.45	1625.89
Glycerophospholipids	800.6297@23.96	38079.2
Glycerolipids	800.687@25.1	36683.4
Glycerophospholipids	802.6453@24.53	40302.3
Glycerolipids	805.7163@24.39	60589.2
Glycerolipids	807.7322@24.98	113958
Glycerolipids	809.7475@25.64	89746.8
Glycerophospholipids	812.6297@23.91	43861
	814.2068@21.58	492257
Glycerophospholipids	814.6462@24.46	92600.7
Glycerolipids	814.7022@25.69	24843.7
Glycerophospholipids	816.6608@25.1	84209.4
Glycerolipids	817.716@24.29	38933
Glycerolipids	819.7325@24.91	147324
Glycerolipids	821.7478@25.51	229822
Glycerolipids	823.7635@26.35	184687
Glycerophospholipids	824.6299@23.82	8353.87
Glycerolipids	824.6878@24.91	43210.2
Glycerolipids	826.6457@24.39	41086.9
Glycerophospholipids	828.6616@24.98	74630.5
Glycerolipids	828.7185@26.33	46473.9
Glycerolipids	830.6768@25.67	57998.8
Glycerolipids	833.7474@25.43	72771.8
Glycerophospholipids	834.4989@16.02	2559.88
Glycerolipids	835.7631@26.14	110422
Glycerolipids	837.7787@27.06	61264.9
Glycerophospholipids	838.6456@24.3	26818.3
Glycerolipids	838.7031@25.43	23652.5
Glycerolipids	840.6622@24.91	95077.3
Glycerolipids	840.7183@26.14	31146.5
Glycerophospholipids	841.7@22.87	10886.1
Glycerolipids	842.6771@25.52	154829
Glycerolipids	842.734@27.06	15350.8
Glycerolipids	844.6928@26.35	118068
	845.2853@23	29967.7
Glycerolipids	845.7474@25.34	70103.2
Glycerolipids	847.7636@25.91	218534
	849.2435@11.31	7171.23
Glycerolipids	849.7792@26.83	525620
Glycerolipids	851.7948@27.87	114976
Fatty Acyls	852.1624@21.58	4375.05
Glycerolipids	852.661@24.79	17533.9
Glycerolipids	852.7185@25.92	65152.5
Glycerolipids	854.6774@25.43	55952.6
Glycerolipids	854.7345@26.83	135651
Glycerolipids	856.6925@26.14	77274.7
prenol Lipids	858.2442@21.58	7454.35
Glycerolipids	858.708@27.06	38536.3
Glycerolipids	861.779@26.62	54548.3
Glycerophospholipids	862.6296@22.86	10530.1
Glycerolipids	863.7948@27.59	67960.8
Glycerolipids	865.8098@28.67	28557.9
Glycerolipids	866.6768@25.35	48334.9
Glycerolipids	868.6928@25.92	151940
Glycerolipids	870.7085@26.83	324969
Glycerolipids	871.7633@25.44	42310.8
Polyketides	872.2597@21.58	9502.1
Glycerolipids	872.7237@27.87	83912.2
Glycerolipids	873.7789@26.32	125827
	874.7797@26.32	49603.9
Glycerolipids	875.7948@27.34	376315
Glycerolipids	877.8105@28.41	529777
Glycerolipids	878.7344@26.32	38984.4
Glycerolipids	879.8258@29.46	69912
Glycerolipids	880.6924@25.93	16908.7
Glycerolipids	880.7501@27.34	109557
Glycerophospholipids	881.5623@1.48	2383.42
Glycerolipids	882.7081@26.61	40138.7
Glycerolipids	882.7658@28.41	140069
Glycerolipids	884.7237@27.6	55041.7
prenol Lipids	888.2257@22.4	515383
Glycerolipids	889.8101@28.15	28183.6
Glycerophospholipids	890.661@23.63	14635.9
	891.2245@22.4	2191.73
Glycerolipids	891.8257@29.2	31458.2
Glycerolipids	892.6928@25.44	32787.3
Glycerolipids	893.8411@30.23	17359.4
Glycerolipids	894.7085@26.33	95437.9
Glycerolipids	894.7648@28.15	9374.12
Glycerolipids	896.7242@27.34	275615
	897.7623@24.44	23495.2
	897.7643@24.44	23468.7
Glycerolipids	898.7396@28.41	396009
Glycerolipids	899.7944@26.79	68492.8
Glycerolipids	900.755@29.47	68672.5
Glycerolipids	901.8103@27.88	150350
Glycerolipids	903.826@28.95	142117
Glycerolipids	905.8419@29.96	264892
Glycerolipids	906.7653@27.88	46988.2
Glycerolipids	907.8514@30.92	40407.1
Glycerolipids	908.7812@28.95	47510.2
Glycerolipids	910.7972@29.96	69686.7
Glycerolipids	912.812@30.91	10197.4
Glycerolipids	917.8408@29.72	9602.11
Glycerophospholipids	918.6928@24.45	24323.4
Glycerolipids	918.7081@25.85	30308.2
Polyketides	919.3038@24	26468.9
Glycerolipids	919.8566@30.95	18143.6
Glycerolipids	920.7238@26.79	49829
Glycerolipids	922.7397@27.88	124987
	923.2622@14.55	6451.93
	923.7788@24.78	22947.9
Glycerolipids	924.7554@28.95	142320
Polyketides	926.1808@22.4	5670.67
Glycerolipids	929.8412@29.43	12851.2
Glycerolipids	931.8568@30.47	23103.7
Polyketides	932.2626@22.4	7887.05
sphingolipids	944.7086@24.78	22252.1
	946.213@23.28	2840.56
	946.2783@22.4	14263.7
	946.7238@25.32	7623.85
Polyketides	949.2777@22.4	3686.13
Glycerolipids	952.7864@30.48	22396.6
	962.2448@23.28	549953
	974.7551@26.81	6385.74
	993.3228@25.21	24667.6
	1000.1997@23.28	8516.03
Polyketides	1006.2811@23.28	9296.41
	1020.2971@23.28	17598.5
Polyketides	1023.2964@23.28	5217.92
	1036.2635@24.34	721515
	1053.29@24.34	396819
	1067.3416@26.74	20822.3
Fatty Acyls	1071.2997@20.33	5931.34
	1074.2184@24.34	10229.6
	1080.3004@24.34	14311.6
	1094.3155@24.34	26121.2
	1110.2814@25.68	7389.56
	1127.3087@25.69	734854
	1141.36@28.64	20815.2
	1148.2372@25.69	11230.1
Polyketides	1154.3187@25.69	16250.4
	1164.7404@2.18	2646.04
	1168.3349@25.68	31574
Polyketides	1184.3006@27.45	4373.42

## Sheet: Categories
Category	Feature	PROM G1-G5	PROM QC			Category		Percent	Percent W/UK
Fatty Acyls	100.0525@0.97	213.379	382.618			Fatty Acyls	1.02686e+06	0.0609731	0.0482178
Fatty Acyls	100.0526@4	11298.4	14377.5			Prenol Lipids	856763	0.0508731	0.0402307
	104.0736@1.03	11625.4	8671.63			Sphingolipids	44076.3	0.00261717	0.00206967
	105.058@0.98	216.336	360.829			Saccharolipids	13034.9	0.000773992	0.000612077
Fatty Acyls	110.0369@0.96	5698.37	15377.5			Glycerolipids	1.09952e+07	0.652879	0.5163
Fatty Acyls	110.1096@1.62	4663.54	2453.89			Sterol Lipids	84033.5	0.00498976	0.00394593
Fatty Acyls	120.0435@1.05	11206.8	22314.1			Glycerophospholipids	2.53308e+06	0.15041	0.118945
Fatty Acyls	128.0458@4	58521.6	74273.7			Polyketides	1.28808e+06	0.0764842	0.0604841
Fatty Acyls	128.0473@4	58780.2	74666.5			total	1.68412e+07
	129.0692@1.09	4522.67	8230.03
Fatty Acyls	129.1518@0.9	7295.36	8639.07			total2	2.12962e+07		1
	132.0699@1.06	16100	24970.6
Fatty Acyls	132.0939@1.89	9332.58	25995.3			unk	4.45507e+06		0.209195
Fatty Acyls	146.058@4	3617.75	4390.86
	148.016@1.39	8996.98	16758.9
Fatty Acyls	149.0317@1.06	24971	43884.9
	157.1581@1.08	2883.68	8727.42			Category		Percent	Percent W/UK
	165.0692@1.1	12598.3	21664.6			Fatty Acyls	1.70081e+06	0.0810099	0.185952
Fatty Acyls	172.0734@0.96	19806.4	65594.2			Prenol Lipids	1.80649e+06	0.0860438	0.0848269
	172.1006@1.06	212.397	330.049			Sphingolipids	66829.5	0.00318311	0.00313809
Fatty Acyls	188.1048@1.89	7936.71	21801.7			Saccharolipids	52603.9	0.00250554	0.0024701
Fatty Acyls	199.1939@1.41	11528	12605.2			Glycerolipids	1.12362e+07	0.535184	0.527615
	200.1072@1.1	9726.21	17999.2			Sterol Lipids	157793	0.00751572	0.00740943
	200.1079@1.07	526.464	920.501			Glycerophospholipids	2.58018e+06	0.122895	0.121156
Fatty Acyls	201.173@0.88	2677.49	9379.03			Polyketides	3.39412e+06	0.161663	0.159377
	206.0251@1.23	4111.46	4433.24			total	2.0995e+07
	206.0251@1.47	4985.14	4819.21
	206.0251@20.28	1359.48	4283.06			total total	3.01415e+07
	206.0255@17.12	1664.83	5409.3
Fatty Acyls	213.2093@1.66	4369.57	8029.82			other unk	9.1465e+06
	220.0773@17.13	4376.3	14397
	220.0773@13.82	3965.93	12326.7
	220.0773@22.4	2108.58	5953.85
	220.0774@21.58	3649.72	8987.5
	222.0563@1.9	5749.39	5715.95
	222.0566@1.23	4121.91	4387.14
	222.0566@1.47	5685.78	5644.75
	222.0566@2.65	2576.56	2815.54
Fatty Acyls	224.1363@1.1	36058.6	43495.8
Fatty Acyls	224.1427@1.1	19807.3	35406.1
Sphingolipids	227.2251@1.68	6885.83	12344
Fatty Acyls	241.2408@2	5001.65	9568.71
Fatty Acyls	254.1672@1.58	1639.02	3564.43
Fatty Acyls	255.2564@2.28	17547.7	16672.6
Fatty Acyls	256.2406@2.45	20676.5	57727.7
Fatty Acyls	257.2358@1.71	2713.17	4279.94
Fatty Acyls	257.2359@1.54	8277.65	12255.1
Fatty Acyls	258.1835@4	8618.97	10978.1
Fatty Acyls	264.2457@2.53	183558	207185
Fatty Acyls	266.2611@3.35	45896.8	77939.3
Fatty Acyls	269.2722@2.45	6737.04	11465.4
	272.1593@0.97	386.457	167.022
Sphingolipids	273.2672@1.23	2529.46	9514.27
	280.0439@1.9	5138.68	4779.69
	280.0439@10.36	4725.05	14828.7
	280.0441@1.47	5223.93	5032.11
	280.0441@20.28	6428.51	20397.4
	280.0441@22.4	1808.66	5262
	280.0443@17.12	3381.15	10883.3
	280.0443@13.82	4988.16	15801.9
	280.1024@1.03	329.346	309.953
Fatty Acyls	280.1436@1.06	6451.71	13733.6
Fatty Acyls	282.2563@2.45	18192.6	49872
	282.2876@1.11	1928.83	2169.82
Fatty Acyls	283.2874@2.94	2413.4	5149.95
Fatty Acyls	283.2875@3.23	2204.16	4281.22
Fatty Acyls	289.262@1.31	9886.07	25578.5
Saccharolipids	294.096@22.4	1215.11	3043.43
Saccharolipids	294.0965@17.13	1474.41	4744.8
Fatty Acyls	297.3035@3.36	12555.8	21231.9
Fatty Acyls	297.3036@3.96	6821.78	11656.9
Fatty Acyls	303.2542@2.53	3287.85	4115.85
Fatty Acyls	303.3047@1.05	2674.37	2684.36
Fatty Acyls	310.2877@3.35	29427.9	47715.2
Fatty Acyls	311.3189@4.08	4838.92	8972.6
Fatty Acyls	315.2048@0.97	3968.05	2780.81
Fatty Acyls	320.3082@4.86	13036.9	46159.2
Fatty Acyls	320.3085@4.64	91210.5	145987
Fatty Acyls	325.3349@4.84	9509.85	17951.5
Glycerolipids	330.2775@2.45	29991.8	92329.4
Fatty Acyls	336.194@1.89	4445.02	12210.1
Fatty Acyls	337.335@4.86	12827	45988.5
Fatty Acyls	339.35@6.32	2566.25	4908.99
	340.0109@20.28	2308.6	7132.87
	340.0111@17.12	3954.27	12591.7
Fatty Acyls	353.366@7.6	4923.09	8557.59
Fatty Acyls	353.3662@6.5	5528.99	9196.49
	354.0628@20.28	5345.96	17592
	354.0629@13.82	16666	53895.8
	354.0629@2.65	3402.38	3656.33
	354.063@22.4	5155.83	15096.2
	354.063@17.12	9329.35	30253.2
	354.0631@21.58	11100.5	32256.3
	354.0631@24.34	1308.97	3269.93
Fatty Acyls	356.274@2.45	4179.48	10529.3
Glycerolipids	358.3087@3.35	89035.2	159064
	362.3033@1.92	390.487	1518.93
Fatty Acyls	367.3816@7.79	2475.32	4025.61
Fatty Acyls	367.3817@8.61	9470.22	18054.8
	370.0942@2.65	8079.64	8496.1
	370.0943@3.9	3631.77	4125.76
Fatty Acyls	370.3089@4	54318.5	70142.4
	381.3974@9.14	5788.34	10554.9
Glycerophospholipids	386.1791@1.03	17034.6	15908.8
	393.3401@7.98	88905.8	113607
Fatty Acyls	408.2646@4	6640.02	8381.45
	412.1758@1.03	4384.28	4008.94
	414.0295@10.36	2515.42	7775.46
	414.0296@20.28	1988.87	6047.93
	414.0297@13.82	2620.28	8105.24
Fatty Acyls	414.2037@1.06	74930.7	147561
Fatty Acyls	426.2985@1.54	4789.98	21230.6
	428.0817@20.28	8227.08	26395.4
	428.0819@21.58	4203.71	11669.4
	428.0819@22.4	6548.74	19207.3
	428.082@17.13	17735.1	59149.8
	428.082@24.34	1278.75	3731.68
	428.0821@23.28	3213.18	9364.09
Sterol Lipids	430.3121@23.36	43184.6	40211.6
	440.2079@1.06	13769.4	27473.6
Sterol Lipids	444.3266@2.45	32655.9	92371.9
Fatty Acyls	452.1669@1.06	3392.09	6339.8
	452.2119@2.84	7597.68	8921.47
	470.3246@1.53	6989.27	30973.7
Prenol Lipids	472.3579@3.35	75009.5	121757
Sterol Lipids	482.2823@2.45	2597.01	6816.42
Glycerophospholipids	484.283@1.89	43518	125208
Sterol Lipids	484.3531@0.98	5205.44	17229.1
	488.0483@17.12	2226.78	6796.84
	488.0486@13.81	2924.23	9079.1
	502.1003@22.4	1873.87	5483.77
	502.1004@20.28	13765.8	45048
	502.1004@10.36	5875.39	18470.4
	502.1006@23.28	3060.97	8919.83
	502.1007@21.58	4994.1	14806.2
	502.1016@24.34	3175.11	8766.43
	505.3601@2.45	3387.76	9020.57
Polyketides	510.2795@1.89	9056.86	25010
	514.351@1.51	10569.5	46015.2
Polyketides	518.1319@10.36	37754.9	124927
Polyketides	521.1303@10.36	3844.21	11997.4
Glycerophospholipids	522.2387@1.89	1635.62	4575.32
	523.5693@17.11	4768.72	11080.1
Glycerophospholipids	530.2669@1.94	5561.67	1829.97
	530.3474@2.45	955.315	1845.56
	535.5695@20.52	1672.88	3605.48
	536.5284@12.47	5557.28	16123.3
	551.6009@19.81	25245.2	59799.1
	553.1688@2.65	2858.74	2980.97
	558.377@1.49	11318.7	48983
Polyketides	562.067@17.12	1585.26	4940.08
Polyketides	562.0671@20.28	1131.86	3194.45
	562.5439@2.53	22786.1	27522.2
	564.5594@15.19	7994.84	21109
	576.1193@21.58	6448.02	18813.8
	576.1193@13.81	9126.18	29400.1
	576.1194@22.4	1962.18	5527.11
	576.1196@24.33	1026	2611.28
Fatty Acyls	576.5121@28.41	11136.4	11750.7
Glycerolipids	578.5279@18.98	37721.9	137226
	579.1177@13.82	1355.62	4166.92
	579.6324@21.3	18719.4	44094.8
	592.1505@13.82	1868.91	5583.12
Glycerolipids	596.5383@18.97	21937.3	78154.3
Prenol Lipids	598.3841@1.05	3932.32	2272.18
	600.3109@2.08	503.652	493.833
Saccharolipids	602.4033@1.47	10345.4	44815.7
Glycerolipids	604.5434@29.96	6845.17	7557.88
Glycerophospholipids	606.3839@16.02	16098.2	21578.9
Glycerophospholipids	606.4628@16.24	3463.29	8600.7
Glycerolipids	606.5594@20.89	177500	219341
	607.6636@22.13	49158.6	116211
Polyketides	609.1772@13.82	212886	696953
Polyketides	614.1737@13.82	1922.93	6014.85
Sterol Lipids	617.3928@1.89	390.579	1163.88
	627.1875@3.9	6867.84	7620.05
Glycerophospholipids	634.4941@18.98	6997.85	24228.4
	635.6944@22.95	7465.63	16690
Glycerolipids	641.5964@20.89	18550.2	81615.5
	646.4292@1.46	8160.74	35917.1
Glycerophospholipids	646.452@21.33	234890	16185.1
Glycerophospholipids	648.5094@22.34	16126.3	13631.5
	650.1378@22.4	3185.6	8969.07
	650.1379@17.12	7809.84	24866.2
Glycerophospholipids	652.434@6.58	3647.42	5347.19
	653.1361@17.12	1466.23	4527.1
Glycerolipids	655.575@20.89	74808.4	57871.3
Glycerophospholipids	662.4467@16.03	701409	851125
	663.7258@23.87	9285.86	20885.9
	666.1693@17.12	1613.06	5074.04
Glycerolipids	668.5407@2.45	8835.42	68934.7
	674.6692@4.64	7799.03	11063.8
Glycerophospholipids	680.4132@21.33	16130	3301
Glycerolipids	682.5939@23.36	1.77139e+06	1.71173e+06
	683.196@17.12	389104	1.15606e+06
Glycerolipids	683.6066@21.76	90617.7	76822.8
	689.1913@17.12	1479.5	4798.6
	697.2482@21.11	56637.4	54691
Glycerolipids	698.5885@21.51	131072	118470
Glycerophospholipids	700.4025@16.02	31565.6	41304.8
	701.2066@5.77	6957.63	8320.68
Polyketides	704.125@17.12	940.952	2996.4
Glycerophospholipids	704.5358@21.77	57597.5	55261.4
Glycerophospholipids	706.4841@16.02	18718.5	24853.2
Glycerophospholipids	707.482@1.44	5629.06	25549.6
Glycerolipids	707.6066@21.53	23187	19848.1
Glycerolipids	709.6217@22.04	56211.4	52702
Glycerolipids	711.6378@22.54	59290.4	59730.6
Glycerophospholipids	716.5194@2.45	2314.24	11295.3
Glycerophospholipids	720.4997@16.02	22853.4	29741.3
Glycerophospholipids	720.5501@23.36	424869	406881
Polyketides	724.1565@20.28	5418.99	16639.3
Glycerolipids	724.6035@3.35	31650	90807.6
Glycerophospholipids	730.5509@22.03	28438.1	27461.9
Glycerophospholipids	732.5662@22.51	37489.6	33960.3
Glycerophospholipids	735.5356@16.02	4492.91	5809.69
Glycerophospholipids	736.5443@21.52	35685.6	34600.8
Glycerophospholipids	736.5445@23.36	59927.4	56694.2
Glycerolipids	737.6532@22.75	42821.3	42496.3
Glycerolipids	739.6692@23.35	106955	97215.4
Polyketides	740.1883@20.28	470615	1.17765e+06
Glycerophospholipids	749.515@16.02	7441.34	9518.35
Glycerophospholipids	751.5077@1.41	3413.86	16559.4
Glycerophospholipids	756.5674@22.27	7818.79	6927.48
Polyketides	757.2151@20.28	445590	1.11202e+06
Prenol Lipids	758.2157@20.28	254984	691244
Glycerophospholipids	758.5821@22.75	21243.3	20597.4
Glycerophospholipids	760.5982@23.21	31687.5	30750.1
Polyketides	763.2101@20.28	2718.11	8481.76
Glycerophospholipids	763.531@16.02	2168.38	2729.05
Sphingolipids	767.6267@3.35	8769.54	17046.5
Glycerolipids	767.7006@24.07	85172	82304.1
	771.2668@22.09	34087.3	33328.7
Glycerophospholipids	772.5985@23.08	10875.4	10485.1
Glycerophospholipids	774.6139@23.59	15239.5	14711.1
	775.225@8.29	6107.97	7552.06
Polyketides	778.1436@20.28	2220.69	6675.69
Sphingolipids	779.5611@16.02	3639.31	4884.59
Glycerolipids	779.7006@23.97	61152.8	55518.8
Glycerolipids	781.7161@24.53	64491.8	62638.6
Polyketides	784.2256@20.28	4044.5	11735.5
Glycerophospholipids	784.5985@23.03	14617.2	13839
Glycerophospholipids	786.614@23.52	37294.4	36775.7
Glycerophospholipids	788.6297@24.08	50265.7	49264.6
Glycerophospholipids	789.5469@16.02	3379.67	4298.28
Glycerophospholipids	790.4915@16.02	16283.3	21893.6
Glycerolipids	791.7006@23.91	70892.3	63839.4
Glycerolipids	793.7169@24.46	144742	139122
Glycerolipids	795.732@25.1	136188	135953
	798.241@20.28	1587.99	4203.45
Glycerolipids	798.6719@24.47	42224.2	39742.8
Glycerolipids	799.6166@2.45	1625.89	10589.5
Glycerophospholipids	800.6297@23.96	38079.2	37076.8
Glycerolipids	800.687@25.1	36683.4	35030.6
Glycerophospholipids	802.6453@24.53	40302.3	38509.5
Glycerolipids	805.7163@24.39	60589.2	56716.4
Glycerolipids	807.7322@24.98	113958	112834
Glycerolipids	809.7475@25.64	89746.8	84410
Glycerophospholipids	812.6297@23.91	43861	44460
	814.2068@21.58	492257	927049
Glycerophospholipids	814.6462@24.46	92600.7	88040.7
Glycerolipids	814.7022@25.69	24843.7	21855.4
Glycerophospholipids	816.6608@25.1	84209.4	83075.9
Glycerolipids	817.716@24.29	38933	35923.7
Glycerolipids	819.7325@24.91	147324	145257
Glycerolipids	821.7478@25.51	229822	220892
Glycerolipids	823.7635@26.35	184687	186361
Glycerophospholipids	824.6299@23.82	8353.87	7509.53
Glycerolipids	824.6878@24.91	43210.2	41733.4
Glycerophospholipids	826.6457@24.39	41086.9	38494.7
Glycerophospholipids	828.6616@24.98	74630.5	68972.3
Glycerolipids	828.7185@26.33	46473.9	45909.1
Glycerolipids	830.6768@25.67	57998.8	53779.8
Glycerolipids	833.7474@25.43	72771.8	73461.4
Glycerophospholipids	834.4989@16.02	2559.88	3288.32
Glycerolipids	835.7631@26.14	110422	112471
Glycerolipids	837.7787@27.06	61264.9	60385.8
Glycerophospholipids	838.6456@24.3	26818.3	25795.9
Glycerolipids	838.7031@25.43	23652.5	22301.2
Glycerolipids	840.6622@24.91	95077.3	93273.7
Glycerolipids	840.7183@26.14	31146.5	28052.2
Glycerophospholipids	841.7@22.87	10886.1	11349.1
Glycerolipids	842.6771@25.52	154829	145131
Glycerolipids	842.734@27.06	15350.8	15768.9
Glycerolipids	844.6928@26.35	118068	111272
	845.2853@23	29967.7	29649
Glycerolipids	845.7474@25.34	70103.2	68380.1
Glycerolipids	847.7636@25.91	218534	216712
	849.2435@11.31	7171.23	8842.93
Glycerolipids	849.7792@26.83	525620	527796
Glycerolipids	851.7948@27.87	114976	120586
Fatty Acyls	852.1624@21.58	4375.05	12139.4
Glycerolipids	852.661@24.79	17533.9	16523.5
Glycerolipids	852.7185@25.92	65152.5	63226.1
Glycerolipids	854.6774@25.43	55952.6	48713.7
Glycerolipids	854.7345@26.83	135651	132265
Glycerolipids	856.6925@26.14	77274.7	72674.4
prenol Lipids	858.2442@21.58	7454.35	19662
Glycerolipids	858.708@27.06	38536.3	37515.1
Glycerolipids	861.779@26.62	54548.3	54680.3
Glycerophospholipids	862.6296@22.86	10530.1	10276.4
Glycerolipids	863.7948@27.59	67960.8	66591.3
Glycerolipids	865.8098@28.67	28557.9	28831.2
Glycerolipids	866.6768@25.35	48334.9	46229.7
Glycerolipids	868.6928@25.92	151940	147659
Glycerolipids	870.7085@26.83	324969	311592
Glycerolipids	871.7633@25.44	42310.8	37793.3
Polyketides	872.2597@21.58	9502.1	24680.3
Glycerolipids	872.7237@27.87	83912.2	83791.2
Glycerolipids	873.7789@26.32	125827	126003
	874.7797@26.32	49603.9	53588.2
Glycerolipids	875.7948@27.34	376315	358561
Glycerolipids	877.8105@28.41	529777	540007
Glycerolipids	878.7344@26.32	38984.4	38343
Glycerolipids	879.8258@29.46	69912	67356.6
Glycerolipids	880.6924@25.93	16908.7	15664.4
Glycerolipids	880.7501@27.34	109557	104593
Glycerophospholipids	881.5623@1.48	2383.42	2195.26
Glycerolipids	882.7081@26.61	40138.7	39307.9
Glycerolipids	882.7658@28.41	140069	139930
Glycerolipids	884.7237@27.6	55041.7	50736.2
prenol Lipids	888.2257@22.4	515383	971558
Glycerolipids	889.8101@28.15	28183.6	29380.9
Glycerophospholipids	890.661@23.63	14635.9	13541.7
	891.2245@22.4	2191.73	5973.65
Glycerolipids	891.8257@29.2	31458.2	30921
Glycerolipids	892.6928@25.44	32787.3	31766.9
Glycerolipids	893.8411@30.23	17359.4	17768.7
Glycerolipids	894.7085@26.33	95437.9	90914.8
Glycerolipids	894.7648@28.15	9374.12	9348.36
Glycerolipids	896.7242@27.34	275615	261484
	897.7623@24.44	23495.2	23001
	897.7643@24.44	23468.7	20617.9
Glycerolipids	898.7396@28.41	396009	392639
Glycerolipids	899.7944@26.79	68492.8	68975.5
Glycerolipids	900.755@29.47	68672.5	66483.9
Glycerolipids	901.8103@27.88	150350	153760
Glycerolipids	903.826@28.95	142117	145947
Glycerolipids	905.8419@29.96	264892	272192
Glycerolipids	906.7653@27.88	46988.2	46210.9
Glycerolipids	907.8514@30.92	40407.1	41873.5
Glycerolipids	908.7812@28.95	47510.2	46389.4
Glycerolipids	910.7972@29.96	69686.7	68415.1
Glycerolipids	912.812@30.91	10197.4	9958.16
Glycerolipids	917.8408@29.72	9602.11	10453.8
Glycerophospholipids	918.6928@24.45	24323.4	24308.8
Glycerolipids	918.7081@25.85	30308.2	29510.1
Polyketides	919.3038@24	26468.9	26378.4
Glycerolipids	919.8566@30.95	18143.6	18367.7
Glycerolipids	920.7238@26.79	49829	47314.2
Glycerolipids	922.7397@27.88	124987	124117
	923.2622@14.55	6451.93	8033.02
	923.7788@24.78	22947.9	22946.1
Glycerolipids	924.7554@28.95	142320	140697
Polyketides	926.1808@22.4	5670.67	15759.7
Glycerolipids	929.8412@29.43	12851.2	12184.5
Glycerolipids	931.8568@30.47	23103.7	23318.7
Polyketides	932.2626@22.4	7887.05	20601.6
sphingolipids	944.7086@24.78	22252.1	23040.1
	946.213@23.28	2840.56	7554.72
	946.2783@22.4	14263.7	35608
	946.7238@25.32	7623.85	7030.84
Polyketides	949.2777@22.4	3686.13	8815.3
Glycerolipids	952.7864@30.48	22396.6	19305.5
	962.2448@23.28	549953	1.07685e+06
	974.7551@26.81	6385.74	5679.43
	993.3228@25.21	24667.6	24671
	1000.1997@23.28	8516.03	23855.5
Polyketides	1006.2811@23.28	9296.41	23855.9
	1020.2971@23.28	17598.5	42913.9
Polyketides	1023.2964@23.28	5217.92	12218.8
	1036.2635@24.34	721515	1.5481e+06
	1053.29@24.34	396819	810934
	1067.3416@26.74	20822.3	20692
Fatty Acyls	1071.2997@20.33	5931.34	7215.06
	1074.2184@24.34	10229.6	28997.4
	1080.3004@24.34	14311.6	36081.4
	1094.3155@24.34	26121.2	61921.1
	1110.2814@25.68	7389.56	20046.6
	1127.3087@25.69	734854	1.71935e+06
	1141.36@28.64	20815.2	20658.3
	1148.2372@25.69	11230.1	32748.9
Polyketides	1154.3187@25.69	16250.4	41101.3
	1164.7404@2.18	2646.04	2571.71
	1168.3349@25.68	31574	73791.3
Polyketides	1184.3006@27.45	4373.42	11471.7
